# Supplementary material
Source: PubMed Central journal article supplement (PMC4567955)
Supplement: NIHMS687603-supplement-01.pdf [file NIHMS687603-supplement-01.pdf]

## SUPPLEMENTAL INFORMATION

### Identification of Genes Expressed in Hyperpigmented Skin using Meta-Analysis of Microarray Datasets

Lanlan Yin<sup>1</sup>, Sergio G. Coelho<sup>1</sup>, Julio C. Valencia<sup>1</sup>, Dominik Ebsen<sup>1</sup>, Andre Mahns<sup>2</sup>, Christoph Smuda<sup>2</sup>, Sharon A. Miller<sup>3</sup>, Janusz Z. Beer<sup>3</sup>, Ludger Kolbe<sup>2</sup> and Vincent J. Hearing<sup>1</sup>

<sup>1</sup> Laboratory of Cell Biology, National Cancer Institute, National Institutes of Health, Bethesda, MD 20892 USA; <sup>2</sup> R&D Skin Research, Beiersdorf AG, Hamburg 20245 Germany; <sup>3</sup> Center for Devices and Radiological Health, Food and Drug Administration, Silver Spring, MD 20993, USA

## SUPPLEMENTAL MATERIALS AND METHODS

### Microarray Studies Included in the Meta-Analysis and Selection of Subsets used

#### Dataset 1: Repetitive UV (UV) dataset [GSE21429]

Six subjects with type II–III skin were irradiated 5 times a week for 2 weeks with UVA, UVB or UVA & UVB (termed SSR) at suberythemal doses (0.4 MED in week 1 and 0.5 MED in week 2) that produce comparable levels of visible skin tanning (Miyamura *et al.*, 2007). Skin biopsy specimens were taken from each subject on the treated and untreated areas. Microarray data are stored in the GEO database (GSE21429) (Choi *et al.*, 2010). For the meta-analysis, we used the paired comparison of SSR vs. CTL.

#### Dataset 2: Long-Lasting Pigmentation (LLP) dataset [GSE56754]

Seven subjects with type II–III skin were treated with SSR, UVA or UVB repeatedly for 2 weeks, as noted for the repetitive UV study noted above. Biopsies from each of the subjects of the UV-exposed areas and the corresponding control area were taken in the 3<sup>rd</sup> week, 7 days after irradiation (t1). One week later, a 1.5 MED SSR challenge was applied to the UV-exposed areas and the control area, and biopsy samples were taken immediately after the UV challenge (t2) and 4 days after the UV challenge (t3). In addition, in order to study the LLP effect, biopsy specimens of the UV-exposed, the UV-challenged (cha) and the corresponding control (CTL) areas were evaluated 4 months (t4) after the UV exposure regimen. Microarray data are stored in the GEO database (GSE56754) and are being reported separately (Coelho *et al.*, 2015a; Coelho *et al.*, 2015b). Common differentially expressed genes in response to SSR at all 4 time points identified by raw p value were loaded into the Mfuzz package. Twelve clusters were obtained by that analysis, and the time course pattern represented by cluster 7 was particularly interesting. Many genes important to pigmentation, such as SILV, TYR, DCT and KITLG (Figure S1), were found in cluster 7 and were up-regulated at the first time point (t1=day14) and then gradually returned towards the baseline (t2=day21). But 4 days after the UV challenge (t3=day25), their expression levels increased dramatically, and then returned to the baseline level at the last time

point (t4=4months). The peak expression level of those genes in cluster 7 was located at time point 3 (day25). Therefore, for the meta-analysis, we used the paired samples of SSR vs. CTL from the 7 subjects at the third time point (t3).

### **Dataset 3: Post-Inflammatory Hyperpigmentation (PIH) dataset [GSE56803]**

A suction blister model was developed to study the gene expression pattern during the process of PIH. Fourteen subjects with type II–III skin were treated by the creation of suction blisters (SB), and samples from the treated areas and the corresponding control areas (from the same subjects) were taken 1 week (t1), 2 weeks (t2), 4 weeks (t3), 6 weeks (t4) and 16 weeks (t5) after treatment. For the meta-analysis we used paired samples from 14 subjects at the selected time point. Microarray data are stored in the GEO database (GSE56803) and will be reported separately (Ebsen et al., in preparation). There were mixed effects of inflammation and hyperpigmentation immediately after creation of the suction blister. The inflammation gradually reduced but the hyperpigmentation persisted. In order to identify the appropriate time point to investigate the hyperpigmentation with the lowest inflammation effect, IPA pathway analyses were applied to the dataset. Figure S2A shows the expression alteration of genes related to inflammation of the skin component. Seven out of those 8 genes were significantly altered ( $p < 0.05$  & fold change  $> 1.2$ ) at the first time point (t1=1week), which indicated that the inflammation effect was quite strong at that time (green = significantly down-regulated and red = significantly up-regulated). In contrast, at time point 4 (t4=6weeks), 7 of the 8 inflammation genes tested had returned to their normal baseline expression level, which indicated that only a minor inflammation impact remained at that time. Figure S2B shows the expression changes of genes related to melanocyte development and the pigmentation signaling pathways. Quite a few genes in this pathway had a significant change in their expression level at time point 1 (=1week), while the most important genes involved in pigmentation, such as TYR, TYRP1, SCF and PI3K, were still up-regulated at time point 4 (=6weeks). This suggested that there was still a moderate pigment effect at time point 4 but little or no inflammatory component. Therefore, for the meta-analysis, we used the paired samples of SB vs. CTL from the 14 subjects at the 4th time point (=6weeks).

### **Dataset 4: Age Spot (AS) dataset [GSE57103]**

Subjects of phototypes I or II (all female, age = 53-70) with various sizes and colors of age spots were recruited for the study. Four mm whole skin punch biopsies were taken from age spots on the forearm of each subject and from a perilesional control area in the vicinity of each age spot. Microarray data are stored in the GEO database (GSE57103) and will be reported separately (Choi et al., in preparation). For the meta-analysis, we used the paired samples of age spot vs. the perilesional control area from 9 subjects.

### **Dataset 5: Ethnic Skin (ES) dataset [GSE54638]**

Subjects in each of 3 racial/ethnic groups (Africans, Asians and Caucasians) were recruited. Four mm skin biopsies were taken from the forearm of each subject for microarray analysis. Microarray data are stored in the GEO database (GSE54638) and have been reported separately (Yin et al., 2014). For the meta-analysis, we used 9 African samples vs. 9 Caucasian samples.

### Microarray Data Preprocessing

All raw microarray data files contain the processed signal intensities from Agilent image processing software: Feature Extraction. Before preprocessing, the data distribution of 5 individual datasets and the chip quality of each individual study were explored by PCA analyses, density plots, box plots and MA plots. After log base 2 transformation of the intensities, quantile-normalization was performed on the dataset using the Bioconductor R-Project package LinearModels for Microarray Data (LIMMA) (Smyth *et al.*, 2005), which enabled comparison of samples. The R package of SVA was used to adjust the microarray data from several batches (different processing dates) to remove unwanted non-biological variations. To condense a microarray data object, values for within-array replicate probes were replaced with their averages. The preprocessed intensities of 41,000 probes were finally loaded into a statistical analysis program. In order to reduce the false positive rate, a gene filtering step was incorporated into the analysis program. Probes with intensities higher than 64 (higher than 5 after log<sub>2</sub> scaled) in at least one experimental group in any of the individual studies were selected. Probes with small variations (IQR<0.2) across all samples in all 5 datasets were excluded from the meta-analysis. Finally, 27,761 probes were selected for further study.

### Statistical Analysis

In this meta-analysis, we were interested in the alteration of gene expression levels before and after treatment or between two biological conditions. The effect size of each gene was represented by log fold change between control samples and hyperpigmented samples. First, we computed the effect size and the standard error of the effect size for each gene in each individual study, and then assessed the consistency of the effect across all 5 studies by calculating  $I^2$ , and a summary effect and its level of significance.

A paired t test was applied to the UV, LLP, PIH and AS datasets to compare expression levels of hyperpigmented samples and control samples for each gene. The resulting mean of difference between the paired samples was used as the treatment effect for the meta-analysis. An unpaired t test was employed to test differences between African skin specimens and Caucasian skin specimens. The resulting difference between means of the two groups was used as the treatment effect for the meta-analysis. After the test on individual studies, a random-effect model was employed to calculate the corresponding summary effect (weighted mean of individual effect  $M^*$ ), the variance of the summary effect (within study variance plus between study variance) and the standard error of the summary effect (square root of variance  $SE_{M^*}$ ) (Borenstein *et al.*, 2009). The statistical significance of a change in gene expression was tested by computing the p value corresponding to z statistics, where the z score= $M^*/SE_{M^*}$ . All meta-analysis was performed in R using the meta package (Schwarzer, 2012). False discovery rate adjustment was performed by the Benjamini&Hochberg method (Hochberg and Benjamini, 1990). To balance the false positive rate and the false negative rate, we applied the following criteria for the selection of differential genes (meta-genes) for further bioinformatics analysis.

- 1) meta-analysis  $p < 0.05$
- 2) summarized effect (absolute value of fold change)  $> 1.2$
- 3) Intensity filtering, which has been done before statistical analysis
  - $\log_2(\text{intensity}) > 5$  in at least one biological group in 5 datasets
  - the inter quartile range (IQR)  $> 0.2$

### **Bioinformatics Analysis**

The curated website of color genes (<http://www.espcr.org/micemut/>) provides information on pigment genes that have been described in mice and in their human and zebrafish homologues. We compared the meta-genes with the 171 currently cloned color genes. Also, we compared the meta-gene list with proteins known to occur in human melanosomes (pigment granules) at various stages of maturation, identified by tandem mass spectrometry (Chi *et al.*, 2006) ([http://pir.georgetown.edu/cgi-bin/textsearch\\_iprox.pl?data=mnt](http://pir.georgetown.edu/cgi-bin/textsearch_iprox.pl?data=mnt)).

To identify functional relationships in differentially expressed genes, the R package GOstats (Falcon and Gentleman, 2007) based on the Gene Ontology database was used. To identify key regulators of hyperpigmentation, meta-genes were loaded into IPA (Ingenuity pathway analysis), which can identify the cascade of upstream transcriptional regulators and enzymes, and thereby explain the observed gene expression changes in our meta dataset.

Additionally, we did cluster analysis using the R package Mfuzz package (Futschik, 2012), which enabled us to group genes by alteration patterns, that is, group genes which increase or decrease consistently in the 5 different datasets. Before clustering, standardization of the expression values of each gene is performed, so that the average expression value for each gene is zero and the standard deviation is one. We were interested in identifying genes that share the same alteration pattern among different biological processes.

Furthermore, we tested the classification ability of our top 50 meta-genes by clustering analysis and PCA analysis. GEO microarray database was searched for testing dataset. All meta-genes were ranked by absolute values of fold change. The Top 50 genes were selected for classification test. Sample distances were calculated by the Euclidean method and sample clustering was performed by the Ward.D method.

### **Immunohistochemistry**

Specimens from 6 subjects of 2 different racial/ethnic groups (Caucasian – S29, S30, S31; African Americans – S32, S36, S38) were used to validate expression patterns using immunohistochemistry. Those 6 subjects were part of a larger cohort approved by the Research Involving Human Subjects Committee of the US Food and Drug Administration which adhered to the Helsinki Guidelines and were previously characterized (Tadokoro *et al.*, 2003; Tadokoro *et al.*, 2005).

Paraffin-embedded skin biopsies were examined for expression of various target proteins using indirect immunofluorescence. Primary antibodies used were: TRIM63 antibody PA5-22112 from Pierce (Rockford, IL) and QPCT antibody HPA008406 from Sigma (St. Louis, MO). After incubation with each primary antibody in the presence of 5% goat serum overnight at 4°C, sections were incubated with an appropriate secondary antibody, Alexa Fluor<sup>®</sup> 594 goat anti-rabbit IgG (H+L), (1:500 dilution; Molecular Probes, Inc., Eugene, OR) in 5% serum for 1 hr at room temperature. Nuclei were counterstained with DAPI (Vector, Burlingame, CA). Fluorescence was observed and photographed using a Leica DMRB/DMLD microscope with a 3CCD 3-chip color video camera (Dage-MTI, Michigan City, IN), and images were processed using AxioVision software (Carl Zeiss MicroImaging GmbH, Frederick, MD).

### **Statistical Language and Packages**

The statistical analysis was carried out in the R language version 3.1.1 ([www.r-project.org](http://www.r-project.org)), and packages were from the Bioconductor project ([www.bioconductor.org](http://www.bioconductor.org)).

## SUPPLEMENTARY REFERENCES

- Borenstein M, Hedges LV, Higgins JPT, Rothstein HR: Introduction to Meta-Analysis 1 ed. (Wiley, 2009).
- Chi A, Valencia JC, Hu ZZ et al. (2006) Proteomic and bioinformatic characterization of the biogenesis and function of melanosomes. *J Proteome Res* 5:3135-44
- Choi W, Miyamura Y, Wolber R et al. (2010) Regulation of human skin pigmentation in situ by repetitive UV exposure - Molecular characterization of responses to UVA and/or UVB. *J Invest Dermatol* 130:1685-96
- Coelho SG, Yin L, Ebsen D et al. (2015a) Photobiological implications of melanin photoprotection after UVB-induced tanning of human skin but not UVA-induced tanning. *Pigment Cell Melanoma Res* 28:210-6
- Coelho SG, Yin L, Valencia JC et al. (2015b) UV exposure modulates hemidesmosome plasticity contributing to long-term pigmentation in human skin. *J Pathol* 236:17-29
- Falcon S, Gentleman R (2007) Using GOstats to test gene lists for GO term association. *Bioinformatics* 23:257-8
- Futschik M: Mfuzz: Soft clustering of time series gene expression data. 2012).
- Miyamura Y, Coelho SG, Wolber R et al. (2007) Regulation of human skin pigmentation and responses to ultraviolet radiation. *Pigment Cell Res* 20:2-13
- Schwarzer G: Meta-Analysis with R 2012).
- Smyth GK, Michaud J, Scott HS (2005) Use of within-array replicate spots for assessing differential expression in microarray experiments. *Bioinformatics* 21:2067-75
- Tadokoro T, Kobayashi N, Zmudzka BZ et al. (2003) UV-induced DNA damage and melanin content in human skin differing in racial/ethnic origin and photosensitivity. *FASEB J* 17:1177-9
- Tadokoro T, Yamaguchi Y, Batzer J et al. (2005) Mechanisms of skin tanning in different racial/ethnic groups in response to ultraviolet radiation. *J Invest Dermatol* 124:1326-32
- Yin L, Coelho SG, Ebsen D et al. (2014) Epidermal gene expression and ethnic pigmentation variations among individuals of Asian, European and African ancestry. *Exp Dermatol* 23:731-5

**SUPPLEMENTAL FIGURES****Figure S1.** Time course plots of TYR, SILV, KITLG and DCT in the LLP dataset.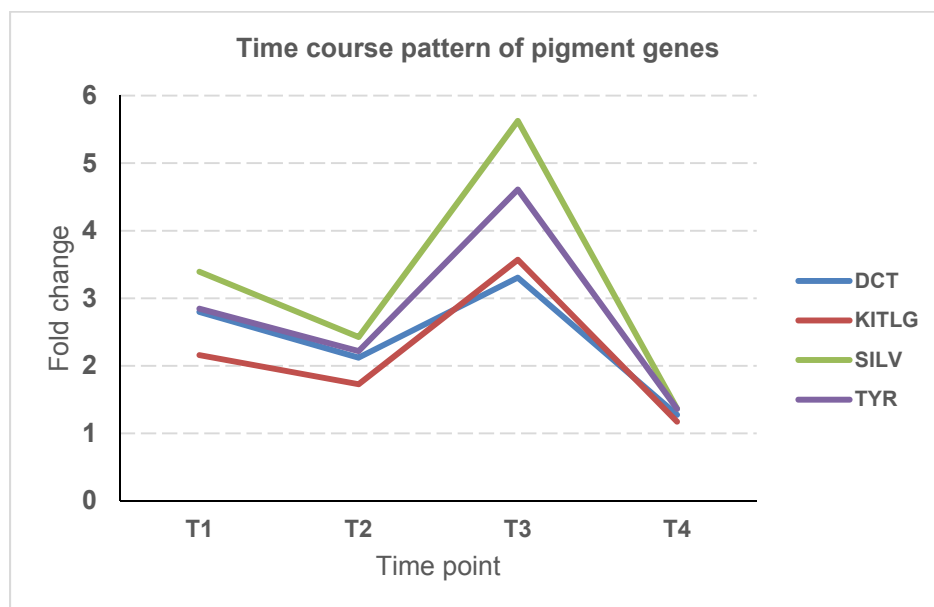

**Figure S2.** Expression changes of genes in the PIH dataset. Up-regulated and down-regulated genes were displayed in red and green. White genes were not significantly changed. **A)** genes related to inflammation of the skin; **B)** genes related to melanocyte development and pigmentation signaling.

A)

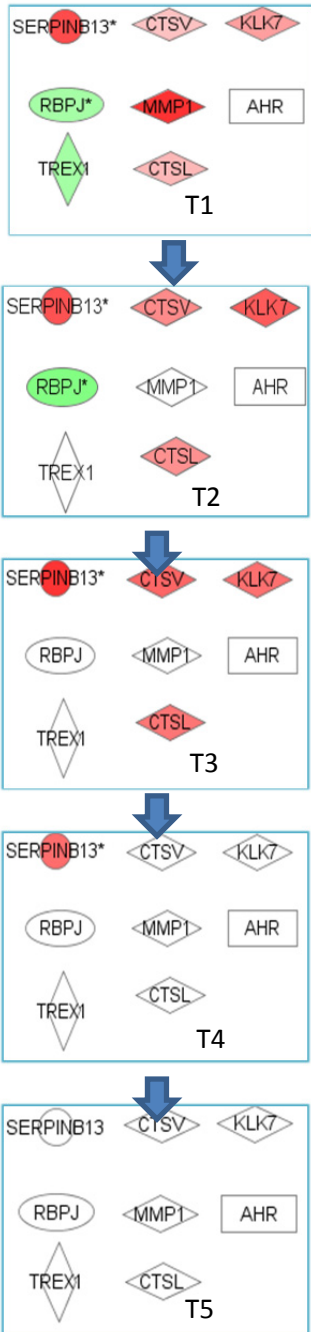

B)

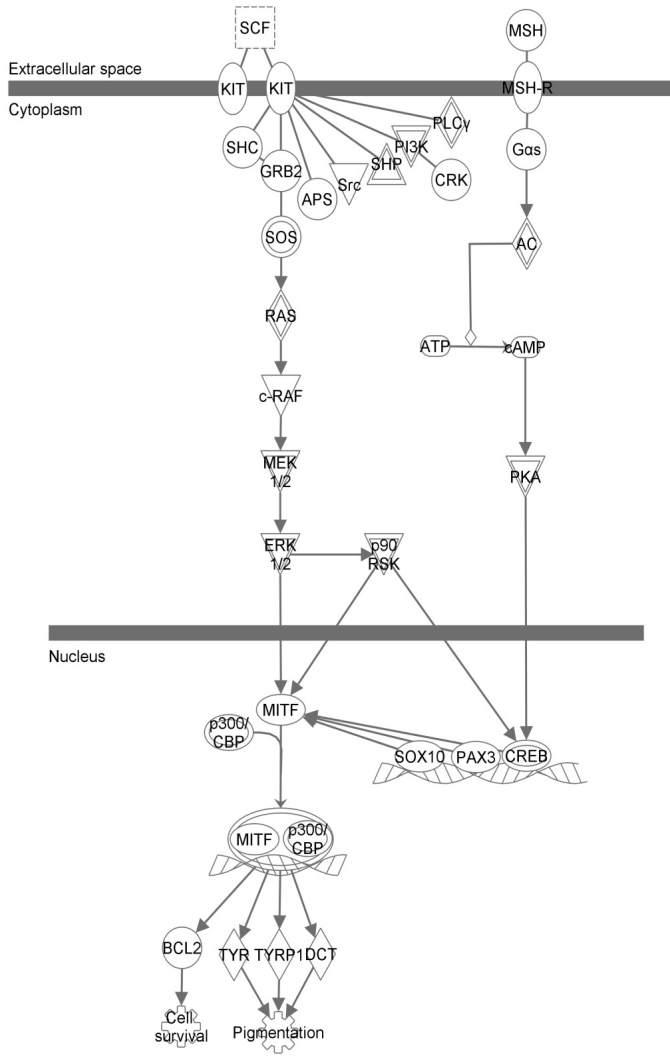

© 2000-2014 QIAGEN. All rights reserved.

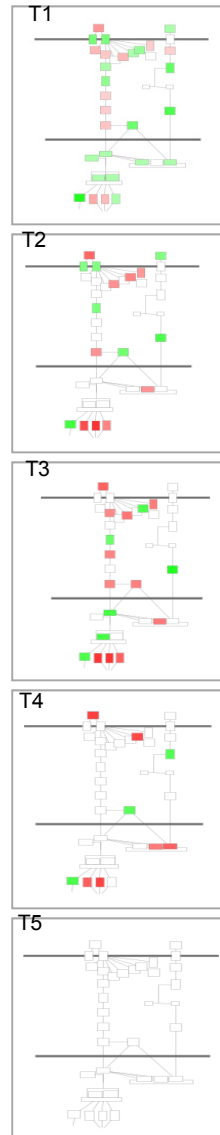



**Figure S3.** Distribution of  $I^2$  statistics computed for all probes selected (27,761 probes). Among the 27,761 probes, 5,427 probes had no inconsistency ( $I^2=0$ ), while 6,200 probes have high heterogeneity ( $I^2>0.75$ ). Among probes with some heterogeneity, the distribution of  $I^2$  is roughly flat. A similar distribution was observed in meta-gene probes. The diversity of  $I^2$  values is to be expected since heterogeneity is likely to arise through different hyperpigmentation models.

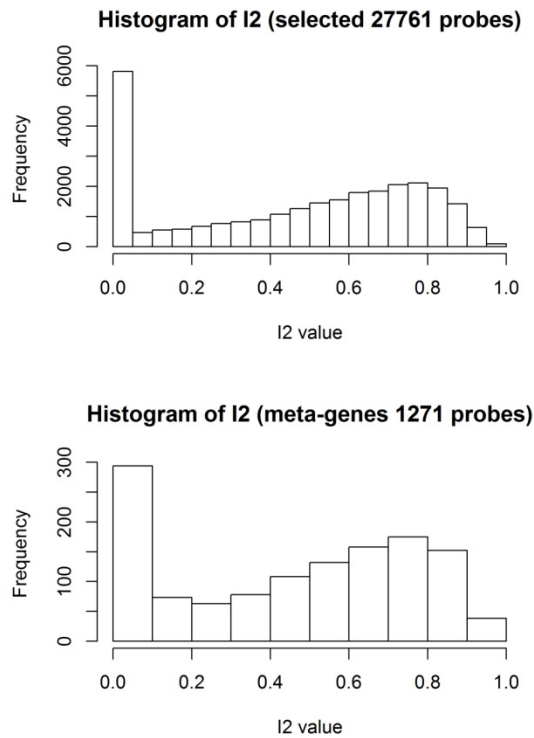

**Figure S4.** Forest plots of SOX2 and MYB, which were not identified as significant in any individual study but were significant in the meta-analysis.

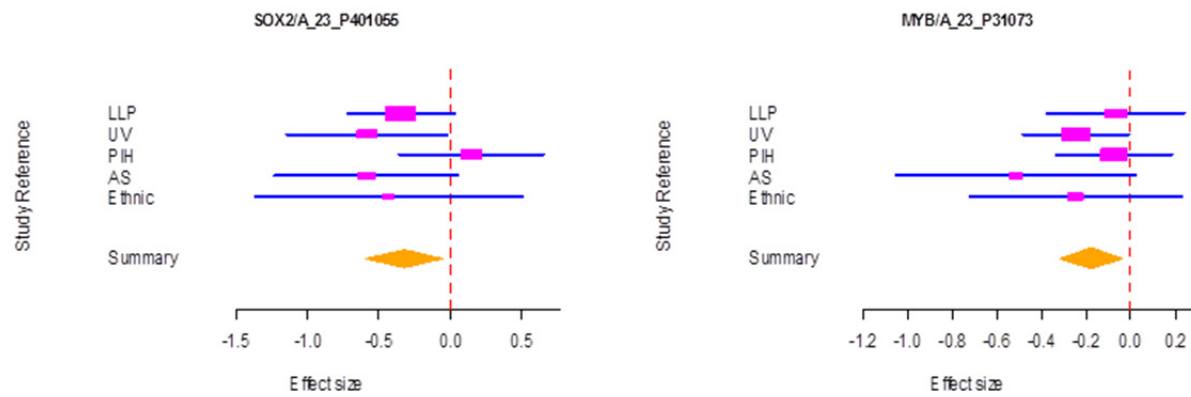

**Figure S5.** **A)** 40 gene alteration pattern clustered by the Mfuzz package. **B)** standardized (left) and unstandardized (right) gene alteration patterns of cluster 26; expression changes were measured by log fold change.

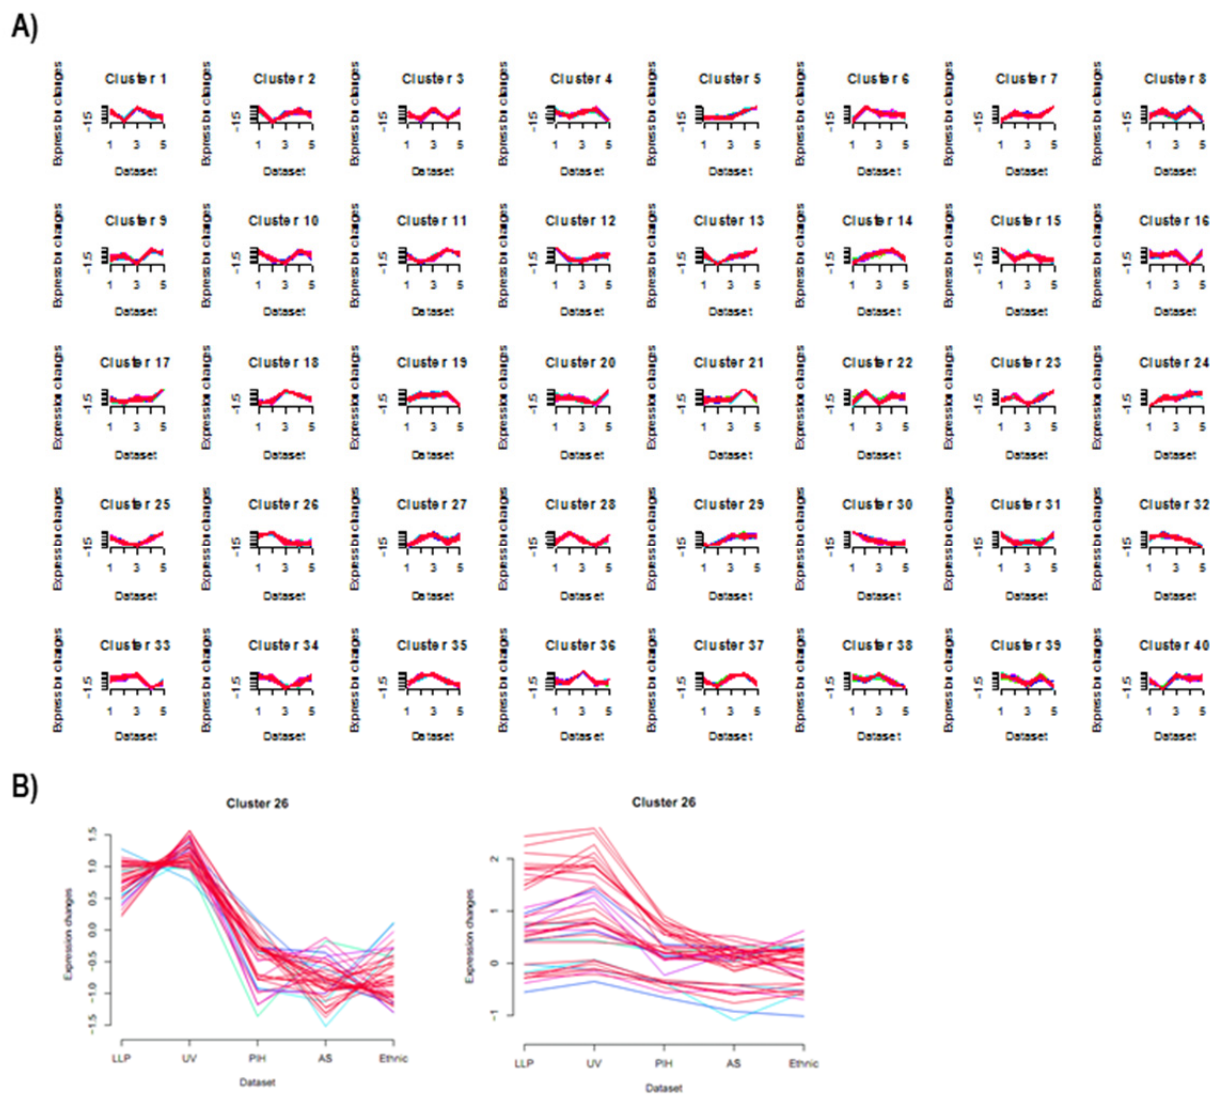

**Figure S6.** Clustering (left) and PCA analysis (right) results of 10 vitiligo and normal skin samples using the top 50 meta-genes.

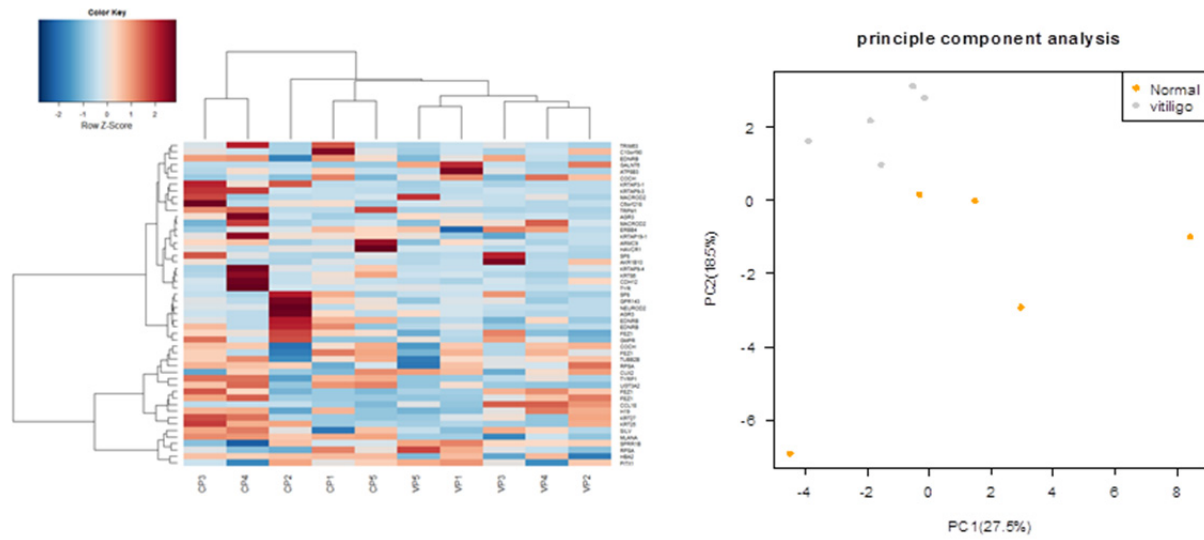

## SUPPLEMENTAL TABLES

**Table S1.** Summary of datasets used for the meta-analysis.

| Study         | GEO accession number | experimental model                        | Comparison  | Sample size | Notes          |
|---------------|----------------------|-------------------------------------------|-------------|-------------|----------------|
| Choi et al.   | GSE21429             | repetitive UV (UV)                        | SSR vs. CTL | 6 pairs     |                |
| Choi et al.   | GSE57103             | Age spot (AS)                             | AS vs. CTL  | 9 pairs     |                |
| Ebsen et al.  | GSE56803             | Post-inflammatory hyperpigmentation (PIH) | SB vs. CTL  | 14 pairs    | 4th time point |
| Coelho et al. | GSE56754             | Long lasting pigmentation (LLP)           | SSR vs. CTL | 7 pairs     | 3rd time point |
| Yin et al.    | GSE54638             | Ethnic skin (ES)                          | AF vs. CA   | 9 vs. 9     |                |

**Table S2.** Data file information

| DataSet | FileName                                          | Condition | Status       | Batch      | SubjectID |
|---------|---------------------------------------------------|-----------|--------------|------------|-----------|
| Agespot | US91803681_251485050054_S01_GE1_105_Dec08_1_1.txt | control   | Control      | 05.01.2010 | 199       |
| Agespot | US91803681_251485053419_S01_GE1_105_Dec08_1_3.txt | control   | Control      | 05.01.2010 | 371       |
| Agespot | US91803681_251485053421_S01_GE1_105_Dec08_1_2.txt | control   | Control      | 05.01.2010 | 1735      |
| Agespot | US91803681_251485053418_S01_GE1_105_Dec08_1_3.txt | control   | Control      | 05.01.2010 | 3296      |
| Agespot | US91803681_251485053418_S01_GE1_105_Dec08_1_1.txt | control   | Control      | 05.01.2010 | 4236      |
| Agespot | US91803681_251485050054_S01_GE1_105_Dec08_1_3.txt | control   | Control      | 05.01.2010 | 5112      |
| Agespot | US91803681_251485053421_S01_GE1_105_Dec08_1_3.txt | control   | Control      | 05.01.2010 | 5711      |
| Agespot | US91803681_251485053419_S01_GE1_105_Dec08_1_2.txt | control   | Control      | 05.01.2010 | 8188      |
| Agespot | US91803681_251485054379_S01_GE1_105_Dec08_1_4.txt | control   | Control      | 26.01.2010 | 12166     |
| Agespot | US91803681_251485053420_S01_GE1_105_Dec08_1_2.txt | agespot   | Hyperpigment | 05.01.2010 | 199       |
| Agespot | US91803681_251485053419_S01_GE1_105_Dec08_1_1.txt | agespot   | Hyperpigment | 05.01.2010 | 371       |
| Agespot | US91803681_251485053419_S01_GE1_105_Dec08_1_4.txt | agespot   | Hyperpigment | 05.01.2010 | 1735      |
| Agespot | US91803681_251485053420_S01_GE1_105_Dec08_1_1.txt | agespot   | Hyperpigment | 05.01.2010 | 3296      |
| Agespot | US91803681_251485053420_S01_GE1_105_Dec08_1_4.txt | agespot   | Hyperpigment | 05.01.2010 | 4236      |
| Agespot | US91803681_251485053418_S01_GE1_105_Dec08_1_2.txt | agespot   | Hyperpigment | 05.01.2010 | 5112      |
| Agespot | US91803681_251485053421_S01_GE1_105_Dec08_1_1.txt | agespot   | Hyperpigment | 05.01.2010 | 5711      |
| Agespot | US91803681_251485053418_S01_GE1_105_Dec08_1_4.txt | agespot   | Hyperpigment | 05.01.2010 | 8188      |
| Agespot | US91803681_251485054376_S01_GE1_105_Dec08_1_3.txt | agespot   | Hyperpigment | 26.01.2010 | 12166     |
| Ethnic  | US91803681_251485074076_S01_GE1_105_Dec08_1_2.txt | control   | Control      | 04.07.2012 | 1         |
| Ethnic  | US91803681_251485074081_S01_GE1_105_Dec08_1_3.txt | control   | Control      | 04.07.2012 | 2         |
| Ethnic  | US91803681_251485074080_S01_GE1_105_Dec08_1_3.txt | control   | Control      | 04.07.2012 | 3         |
| Ethnic  | US91803681_251485074076_S01_GE1_105_Dec08_1_1.txt | control   | Control      | 04.07.2012 | 4         |
| Ethnic  | US91803681_251485074078_S01_GE1_105_Dec08_1_4.txt | control   | Control      | 04.07.2012 | 5         |
| Ethnic  | US91803681_251485074077_S01_GE1_105_Dec08_1_2.txt | control   | Control      | 04.07.2012 | 6         |
| Ethnic  | US91803681_251485074078_S01_GE1_105_Dec08_1_2.txt | control   | Control      | 04.07.2012 | 8         |
| Ethnic  | US91803681_251485074079_S01_GE1_105_Dec08_1_3.txt | control   | Control      | 04.07.2012 | 9         |
| Ethnic  | US91803681_251485074049_S01_GE1_105_Dec08_1_4.txt | control   | Control      | 04.07.2012 | 10        |
| Ethnic  | US91803681_251485074077_S01_GE1_105_Dec08_1_1.txt | African   | Hyperpigment | 04.07.2012 | 1         |
| Ethnic  | US91803681_251485074078_S01_GE1_105_Dec08_1_3.txt | African   | Hyperpigment | 04.07.2012 | 2         |
| Ethnic  | US91803681_251485074076_S01_GE1_105_Dec08_1_4.txt | African   | Hyperpigment | 04.07.2012 | 4         |
| Ethnic  | US91803681_251485074049_S01_GE1_105_Dec08_1_3.txt | African   | Hyperpigment | 04.07.2012 | 5         |
| Ethnic  | US91803681_251485074077_S01_GE1_105_Dec08_1_3.txt | African   | Hyperpigment | 04.07.2012 | 6         |
| Ethnic  | US91803681_251485074079_S01_GE1_105_Dec08_1_1.txt | African   | Hyperpigment | 04.07.2012 | 7         |
| Ethnic  | US91803681_251485074078_S01_GE1_105_Dec08_1_1.txt | African   | Hyperpigment | 04.07.2012 | 8         |
| Ethnic  | US91803681_251485074080_S01_GE1_105_Dec08_1_2.txt | African   | Hyperpigment | 04.07.2012 | 9         |
| Ethnic  | US91803681_251485074079_S01_GE1_105_Dec08_1_2.txt | African   | Hyperpigment | 04.07.2012 | 10        |
| LLP     | US91803681_251485071174_S01_GE1_105_Dec08_1_4.txt | control   | Control      | 12.01.2012 | 4371      |
| LLP     | US91803681_251485071193_S01_GE1_105_Dec08_1_4.txt | control   | Control      | 18.01.2012 | 6382      |
| LLP     | US91803681_251485070861_S01_GE1_105_Dec08_1_1.txt | control   | Control      | 10.01.2012 | 8194      |
| LLP     | US91803681_251485070987_S01_GE1_105_Dec08_1_1.txt | control   | Control      | 09.01.2012 | 14064     |
| LLP     | US91803681_251485070863_S01_GE1_105_Dec08_1_1.txt | control   | Control      | 10.01.2012 | 16531     |
| LLP     | US91803681_251485071194_S01_GE1_105_Dec08_1_4.txt | control   | Control      | 18.01.2012 | 19107     |
| LLP     | US91803681_251485070989_S01_GE1_105_Dec08_1_1.txt | control   | Control      | 09.01.2012 | 19181     |

|     |                                                   |         |              |            |       |
|-----|---------------------------------------------------|---------|--------------|------------|-------|
| LLP | US91803681_251485070865_S01_GE1_105_Dec08_1_2.txt | LLP     | Hyperpigment | 12.01.2012 | 4371  |
| LLP | US91803681_251485071194_S01_GE1_105_Dec08_1_2.txt | LLP     | Hyperpigment | 18.01.2012 | 6382  |
| LLP | US91803681_251485070860_S01_GE1_105_Dec08_1_1.txt | LLP     | Hyperpigment | 10.01.2012 | 8194  |
| LLP | US91803681_251485071193_S01_GE1_105_Dec08_1_2.txt | LLP     | Hyperpigment | 18.01.2012 | 14064 |
| LLP | US91803681_251485070860_S01_GE1_105_Dec08_1_2.txt | LLP     | Hyperpigment | 10.01.2012 | 16531 |
| LLP | US91803681_251485070866_S01_GE1_105_Dec08_1_2.txt | LLP     | Hyperpigment | 12.01.2012 | 19107 |
| LLP | US91803681_251485070990_S01_GE1_105_Dec08_1_4.txt | LLP     | Hyperpigment | 09.01.2012 | 19181 |
| PIH | US91803681_251485060946_S01_GE1_105_Dec08_1_4.txt | control | Control      | 23.08.2010 | 4436  |
| PIH | US91803681_251485060184_S01_GE1_105_Dec08_1_4.txt | control | Control      | 19.08.2010 | 6665  |
| PIH | US91803681_251485061000_S01_GE1_105_Dec08_1_3.txt | control | Control      | 24.08.2010 | 7614  |
| PIH | US91803681_251485059476_S01_GE1_105_Dec08_1_4.txt | control | Control      | 23.08.2010 | 12565 |
| PIH | US91803681_251485059476_S01_GE1_105_Dec08_1_3.txt | control | Control      | 23.08.2010 | 13466 |
| PIH | US91803681_251485060184_S01_GE1_105_Dec08_1_3.txt | control | Control      | 19.08.2010 | 17061 |
| PIH | US91803681_251485060999_S01_GE1_105_Dec08_1_2.txt | control | Control      | 24.08.2010 | 18740 |
| PIH | US91803681_251485064932_S01_GE1_105_Dec08_1_4.txt | control | Control      | 16.11.2010 | P25   |
| PIH | US91803681_251485064845_S01_GE1_105_Dec08_1_1.txt | control | Control      | 16.11.2010 | P26   |
| PIH | US91803681_251485064933_S01_GE1_105_Dec08_1_4.txt | control | Control      | 16.11.2010 | P27   |
| PIH | US91803681_251485064845_S01_GE1_105_Dec08_1_2.txt | control | Control      | 16.11.2010 | P28   |
| PIH | US91803681_251485064934_S01_GE1_105_Dec08_1_4.txt | control | Control      | 16.11.2010 | P29   |
| PIH | US91803681_251485064934_S01_GE1_105_Dec08_1_2.txt | control | Control      | 16.11.2010 | P30   |
| PIH | US91803681_251485064845_S01_GE1_105_Dec08_1_3.txt | control | Control      | 16.11.2010 | P31   |
| PIH | US91803681_251485059476_S01_GE1_105_Dec08_1_2.txt | PIH     | Hyperpigment | 23.08.2010 | 4436  |
| PIH | US91803681_251485059473_S01_GE1_105_Dec08_1_1.txt | PIH     | Hyperpigment | 19.08.2010 | 6665  |
| PIH | US91803681_251485060998_S01_GE1_105_Dec08_1_4.txt | PIH     | Hyperpigment | 24.08.2010 | 7614  |
| PIH | US91803681_251485062172_S01_GE1_105_Dec08_1_1.txt | PIH     | Hyperpigment | 23.08.2010 | 12565 |
| PIH | US91803681_251485062172_S01_GE1_105_Dec08_1_4.txt | PIH     | Hyperpigment | 23.08.2010 | 13466 |
| PIH | US91803681_251485060185_S01_GE1_105_Dec08_1_1.txt | PIH     | Hyperpigment | 19.08.2010 | 17061 |
| PIH | US91803681_251485061019_S01_GE1_105_Dec08_1_2.txt | PIH     | Hyperpigment | 24.08.2010 | 18740 |
| PIH | US91803681_251485064933_S01_GE1_105_Dec08_1_2.txt | PIH     | Hyperpigment | 16.11.2010 | P25   |
| PIH | US91803681_251485064932_S01_GE1_105_Dec08_1_2.txt | PIH     | Hyperpigment | 16.11.2010 | P26   |
| PIH | US91803681_251485064934_S01_GE1_105_Dec08_1_1.txt | PIH     | Hyperpigment | 16.11.2010 | P27   |
| PIH | US91803681_251485064845_S01_GE1_105_Dec08_1_4.txt | PIH     | Hyperpigment | 16.11.2010 | P28   |
| PIH | US91803681_251485064932_S01_GE1_105_Dec08_1_3.txt | PIH     | Hyperpigment | 16.11.2010 | P29   |
| PIH | US91803681_251485064932_S01_GE1_105_Dec08_1_1.txt | PIH     | Hyperpigment | 16.11.2010 | P30   |
| PIH | US91803681_251485064934_S01_GE1_105_Dec08_1_3.txt | PIH     | Hyperpigment | 16.11.2010 | P31   |
| UV  | GSM535685.txt                                     | control | Control      | GEO data   | P2    |
| UV  | GSM535687.txt                                     | control | Control      | GEO data   | P20   |
| UV  | GSM535688.txt                                     | control | Control      | GEO data   | P21   |
| UV  | GSM535689.txt                                     | control | Control      | GEO data   | P22   |
| UV  | GSM535690.txt                                     | control | Control      | GEO data   | P23   |
| UV  | GSM535686.txt                                     | control | Control      | GEO data   | P3    |
| UV  | GSM535691.txt                                     | UV      | Hyperpigment | GEO data   | P2    |
| UV  | GSM535693.txt                                     | UV      | Hyperpigment | GEO data   | P20   |
| UV  | GSM535694.txt                                     | UV      | Hyperpigment | GEO data   | P21   |
| UV  | GSM535695.txt                                     | UV      | Hyperpigment | GEO data   | P22   |
| UV  | GSM535696.txt                                     | UV      | Hyperpigment | GEO data   | P23   |
| UV  | GSM535692.txt                                     | UV      | Hyperpigment | GEO data   | P3    |

**Table S3. Complete list of 1,271 differentially expressed genes identified by meta analysis.**

Please see the separate Excel file provided as Suppl Info for these data.

**Table S4.** Meta-genes that were not significantly different in any of the individual datasets.

118 probes showing a significant p value in the meta-analysis but not in any individual study, include:

\* Enriched GO terms (see Tables S7a, S7b and S7c) for further information

| ProbeID      | Fold change | P value  | Primary Accession | UniGeneID | Gene Symbol | GeneName                                                                                        | Note*                                                                                                                                                                                                                                                                                                                                                                                          |
|--------------|-------------|----------|-------------------|-----------|-------------|-------------------------------------------------------------------------------------------------|------------------------------------------------------------------------------------------------------------------------------------------------------------------------------------------------------------------------------------------------------------------------------------------------------------------------------------------------------------------------------------------------|
| A_24_P351283 | 1.28        | 6.28E-04 | NM_018000         | Hs.709755 | MREG        | melanoregulin                                                                                   | color gene; GO: 0008544 GO: 0021700 GO: 0030154 GO: 0030318 GO: 0032501 GO: 0048066 GO: 0048731; GO: 0016020 GO: 0044459 GO: 0071944                                                                                                                                                                                                                                                           |
| A_23_P401055 | -1.25       | 1.72E-02 | NM_003106         | Hs.518438 | SOX2        | SRY (sex determining region Y)-box 2                                                            | color gene; GO: 0050678 GO:2000026                                                                                                                                                                                                                                                                                                                                                             |
| A_23_P2674   | 1.22        | 4.55E-02 | NM_002272         | Hs.654610 | KRT4        | keratin 4                                                                                       | color gene; GO: 0050678; GO: 0045095 GO: 0045111                                                                                                                                                                                                                                                                                                                                               |
| A_24_P925505 | 1.47        | 1.19E-04 | S67044            |           | CD36        | CD36 molecule (thrombospondin receptor)                                                         | melanosomal protein; GO: 0000302 GO: 0001952 GO: 0002684 GO: 0006952 GO: 0006955 GO: 0007166 GO: 0007599 GO: 0010033 GO: 0010646 GO: 0023052 GO: 0030154 GO: 0030155 GO: 0030168 GO: 0031589 GO: 0032101 GO: 0032655 GO: 0042060 GO: 0048584 GO: 0050817 GO: 0051094 GO: 0051240 GO: 0051707 GO: 0070887; GO: 0038023 GO:0060086; GO: 0005887 GO: 0016020 GO: 0031224 GO: 0044459 GO: 0071944; |
| A_23_P206920 | -1.28       | 5.79E-03 | NM_001040114      | Hs.460109 | MYH11       | myosin, heavy chain 11, smooth muscle                                                           | melanosomal protein; GO: 0006935 GO: 0007399 GO: 0009605 GO: 0040011 GO: 0072358                                                                                                                                                                                                                                                                                                               |
| A_23_P203558 | -1.62       | 1.42E-02 | NM_000518         | Hs.523443 | HBB         | hemoglobin, beta                                                                                | GO: 0000302 GO: 0006952 GO: 0007167 GO: 0007599 GO: 0009605 GO: 0010033 GO: 0010646 GO: 0030154 GO: 0032502 GO: 0042060 GO: 0048731 GO: 0050817 GO: 0051240 GO: 0070887; GO: 0005576 GO: 0005833                                                                                                                                                                                               |
| A_23_P151915 | 1.27        | 3.49E-02 | ENST00000267857   | Hs.194710 | GCNT3       | glucosaminyl (N-acetyl) transferase 3, mucin type                                               | GO: 0002250                                                                                                                                                                                                                                                                                                                                                                                    |
| A_24_P911788 | -1.23       | 7.72E-03 | BC020226          |           | HLA-DOB     | major histocompatibility complex, class II, DO beta                                             | GO: 0002253 GO: 0002429 GO: 0002504 GO: 0002684 GO: 0002694 GO: 0002764 GO: 0006952 GO: 0006955 GO: 0031295 GO: 0034341 GO: 0050852 GO: 0050863 GO: 0050867 GO: 0051251 GO: 0060333 GO: 0071345; GO:0032395 GO: 0038023; GO: 0000323 GO: 0005765 GO: 0010008 GO: 0042613 GO: 0044437                                                                                                           |
| A_24_P393740 | -1.23       | 3.35E-02 | NM_001465         | Hs.370503 | FYB         | FYN binding protein (FYB-120/130)                                                               | GO: 0002253 GO: 0002429 GO: 0002684 GO: 0002764 GO: 0006955 GO: 0007154 GO: 0007166 GO: 0023052 GO: 0048584 GO: 0050852                                                                                                                                                                                                                                                                        |
| A_24_P416489 | -1.34       | 5.82E-03 | U39657            | Hs.463978 | MAP2K6      | mitogen-activated protein kinase kinase 6                                                       | GO: 0002253 GO: 0002684 GO: 0002764 GO: 0006952 GO: 0006955 GO: 0007166 GO: 0048584 GO: 0051094                                                                                                                                                                                                                                                                                                |
| A_23_P152620 | -1.23       | 2.65E-04 | NM_172088         | Hs.54673  | TNFSF13     | tumor necrosis factor (ligand) superfamily, member 13                                           | GO: 0005576 GO: 0005615                                                                                                                                                                                                                                                                                                                                                                        |
| A_23_P218442 | -1.25       | 1.99E-02 | NM_002483         | Hs.466814 | CEACAM6     | carcinoembryonic antigen-related cell adhesion molecule 6 (non-specific cross reacting antigen) | GO: 0005887                                                                                                                                                                                                                                                                                                                                                                                    |
| A_23_P434809 | 1.32        | 3.38E-02 | NM_002964         | Hs.416073 | S100A8      | S100 calcium binding protein A8                                                                 | GO: 0006935 GO: 0006954 GO: 0042060 GO: 0051707                                                                                                                                                                                                                                                                                                                                                |
| A_23_P208167 | -1.29       | 1.89E-04 | NM_002030         | Hs.445466 | FPR3        | formyl peptide receptor 3                                                                       | GO: 0006935 GO: 0009605 GO: 0040011                                                                                                                                                                                                                                                                                                                                                            |
| A_32_P70158  | -1.28       | 2.30E-02 | NM_006864         | Hs.631592 | LILRB3      | leukocyte immunoglobulin-like receptor, subfamily B                                             | GO: 0006952                                                                                                                                                                                                                                                                                                                                                                                    |

|              |       |          |           |           |         |                                                                                                |                                                                                                                                                                                                 |
|--------------|-------|----------|-----------|-----------|---------|------------------------------------------------------------------------------------------------|-------------------------------------------------------------------------------------------------------------------------------------------------------------------------------------------------|
|              |       |          |           |           |         | (with TM and ITIM domains), member 3                                                           |                                                                                                                                                                                                 |
| A_24_P304071 | -1.21 | 1.16E-02 | NM_001547 | Hs.437609 | IFIT2   | interferon-induced protein with tetratricopeptide repeats 2                                    | GO: 0006952 GO: 0006955 GO: 0007166 GO: 0051707 GO: 0070887                                                                                                                                     |
| A_23_P153958 | -1.21 | 1.37E-02 | NM_002193 | Hs.1735   | INHBB   | inhibin, beta B                                                                                | GO: 0006952 GO: 0007167 GO: 0009605 GO: 0010033 GO: 0010646 GO: 0030154 GO: 0032502 GO: 0048731 GO: 0051240 GO: 0070887                                                                         |
| A_23_P153964 | -1.25 | 1.20E-03 | NM_002193 | Hs.1735   | INHBB   | inhibin, beta B                                                                                | GO: 0006952 GO: 0007167 GO: 0009605 GO: 0010033 GO: 0010646 GO: 0030154 GO: 0032502 GO: 0048731 GO: 0051240 GO: 0070887; GO: 0005576                                                            |
| A_23_P36397  | 1.27  | 1.26E-02 | NM_000785 | Hs.524528 | CYP27B1 | cytochrome P450, family 27, subfamily B, polypeptide 1                                         | GO: 0006952 GO: 0008544 GO: 0030216 GO: 0032101 GO: 0034341 GO: 0042592 GO: 0050801 GO: 0051094 GO: 0051707 GO: 2000026                                                                         |
| A_24_P229936 | -1.21 | 4.71E-02 | U18288    | Hs.701991 | CIITA   | class II, major histocompatibility complex, transactivator                                     | GO: 0006952 GO: 0034341 GO: 0060333 GO: 0071345                                                                                                                                                 |
| A_24_P367752 | 1.22  | 1.57E-03 | BC012888  | Hs.222055 | NDST1   | N-deacetylase/N-sulfotransferase (heparan glucosaminyl) 1                                      | GO: 0006954 GO: 0007167                                                                                                                                                                         |
| A_23_P435394 | -1.21 | 3.55E-03 | NM_000958 | Hs.199248 | PTGER4  | prostaglandin E receptor 4 (subtype EP4)                                                       | GO: 0006955 GO: 0007154 GO: 0007166 GO: 0032501; GO: 0038023 GO0060086;                                                                                                                         |
| A_23_P121665 | 1.36  | 2.05E-02 | NM_020777 | Hs.479099 | SORCS2  | sortilin-related VPS10 domain containing receptor 2                                            | GO: 0007154 GO: 0007166 GO: 0023052; GO: 0038023 GO0060086; GO: 0016020 GO: 0031224                                                                                                             |
| A_23_P11874  | 1.22  | 1.70E-03 | NM_003953 | Hs.493919 | MPZL1   | myelin protein zero-like 1                                                                     | GO: 0007154 GO: 0007167 GO: 0023052                                                                                                                                                             |
| A_23_P139912 | -1.27 | 8.71E-03 | NM_002178 | Hs.274313 | IGFBP6  | insulin-like growth factor binding protein 6                                                   | GO: 0007154; GO: 0005576 GO: 0005615                                                                                                                                                            |
| A_23_P344694 | 1.23  | 2.25E-02 | BC014505  | Hs.709178 | MLLT4   | myeloid/lymphoid or mixed-lineage leukemia (trithorax homolog, Drosophila); translocated to, 4 | GO: 0007155                                                                                                                                                                                     |
| A_24_P943180 | 1.21  | 3.00E-03 | AK074160  | Hs.656032 | CDH23   | cadherin-like 23                                                                               | GO: 0007155 GO: 0042592 GO: 0050801                                                                                                                                                             |
| A_24_P62169  | -1.21 | 8.18E-03 | NM_130436 | Hs.368240 | DYRK1A  | dual-specificity tyrosine-(Y)-phosphorylation regulated kinase 1A                              | GO: 0007399                                                                                                                                                                                     |
| A_23_P214681 | 1.26  | 3.56E-04 | NM_006238 | Hs.696032 | PPARD   | peroxisome proliferator-activated receptor delta                                               | GO: 0007399 GO: 0008284 GO: 0008544 GO: 0010646 GO: 0021700 GO: 0031589 GO: 0040011 GO: 0042060 GO: 0042592 GO: 0048584 GO: 0050678 GO: 0050801 GO: 0051094 GO: 0070887; GO: 0038023 GO0060086; |
| A_23_P29096  | -1.25 | 3.32E-02 | NM_002606 | Hs.473927 | PDE9A   | phosphodiesterase 9A                                                                           | GO: 0007599 GO: 0030168 GO: 0042060 GO: 0050817                                                                                                                                                 |
| A_24_P75190  | -1.59 | 9.83E-03 | NM_000519 | Hs.699280 | HBD     | hemoglobin, delta                                                                              | GO: 0007599 GO: 0050817; GO: 0005833                                                                                                                                                            |
| A_23_P20022  | 1.24  | 4.40E-03 | NM_013332 | Hs.710088 | HIG2    | hypoxia-inducible protein 2                                                                    | GO: 0008284; GO: 0005615                                                                                                                                                                        |
| A_23_P38537  | 1.22  | 1.83E-02 | NM_005557 | Hs.655160 | KRT16   | keratin 16 (focal non-epidermolytic palmoplantar keratoderma)                                  | GO: 0008544; GO: 0045111                                                                                                                                                                        |
| A_24_P247820 | 1.20  | 3.40E-04 | AK074633  |           | ELF5    | E74-like factor 5 (ets domain transcription factor)                                            | GO: 0030154 GO: 0032501 GO: 0032502 GO: 0048731                                                                                                                                                 |
| A_23_P64828  | 1.35  | 6.28E-04 | NM_002534 | Hs.524760 | OAS1    | 2',5'-oligoadenylate synthetase 1, 40/46kDa                                                    | GO: 0034341 GO: 0051707 GO: 0060333                                                                                                                                                             |
| A_23_P302568 | 1.32  | 2.07E-03 | NM_003459 | Hs.467981 | SLC30A3 | solute carrier family 30 (zinc transporter), member 3                                          | GO: 0042592 GO: 0050801                                                                                                                                                                         |



|              |       |          |                 |           |           |                                                                                                             |                         |
|--------------|-------|----------|-----------------|-----------|-----------|-------------------------------------------------------------------------------------------------------------|-------------------------|
| A_23_P77980  | 1.25  | 8.70E-04 | NM_000342       | Hs.443948 | SLC4A1    | solute carrier family 4, anion exchanger, member 1 (erythrocyte membrane protein band 3, Diego blood group) | GO: 0042592 GO: 0050801 |
| A_24_P230570 | -1.23 | 2.91E-02 | NM_004118       | Hs.516971 | FOXS1     | forkhead box S1                                                                                             | GO: 0043069 GO: 0051240 |
| A_23_P89665  | 1.55  | 7.22E-03 | NM_002279       | Hs.32950  | KRT33B    | keratin 33B                                                                                                 | GO: 0045111             |
| A_24_P302506 | -1.22 | 3.88E-04 | AB032989        | Hs.709892 | AMIGO1    | adhesion molecule with Ig-like domain 1                                                                     | GO: 0050801 GO: 0051094 |
| A_23_P209116 | 1.31  | 1.26E-04 | AB002454        | Hs.106242 | CYP4F3    | cytochrome P450, family 4, subfamily F, polypeptide 3                                                       | GO: 0070887             |
| A_23_P104073 | 1.28  | 1.57E-02 | NM_002960       | Hs.557609 | S100A3    | S100 calcium binding protein A3                                                                             |                         |
| A_23_P117302 | 1.21  | 4.47E-02 | AF354444        | Hs.650087 |           |                                                                                                             |                         |
| A_23_P118894 | -1.31 | 1.18E-02 | NM_024320       | Hs.368260 | ATAD4     | ATPase family, AAA domain containing 4                                                                      |                         |
| A_23_P133438 | -1.21 | 4.44E-04 | NM_019018       | Hs.591751 | FAM105A   | family with sequence similarity 105, member A                                                               |                         |
| A_23_P139166 | -1.31 | 2.87E-02 | CB959193        | Hs.97644  |           |                                                                                                             |                         |
| A_23_P142756 | -1.22 | 6.34E-03 | NM_017759       | Hs.445036 | FLJ20309  | hypothetical protein FLJ20309                                                                               |                         |
| A_23_P150343 | -1.35 | 1.31E-02 | NM_003063       | Hs.334629 | SLN       | sarcolipin                                                                                                  |                         |
| A_23_P15798  | 1.27  | 3.84E-03 | NM_031854       | Hs.572443 | KRTAP4-12 | keratin associated protein 4-12                                                                             |                         |
| A_23_P163475 | 1.24  | 1.78E-03 | NM_207380       | Hs.32433  | C15orf52  | chromosome 15 open reading frame 52                                                                         |                         |
| A_23_P170608 | -1.20 | 4.73E-04 | NM_022117       | Hs.136164 | TSPYL2    | TSPY-like 2                                                                                                 |                         |
| A_23_P207939 | -1.23 | 5.92E-03 | NM_181482       | Hs.149363 | C18orf1   | chromosome 18 open reading frame 1                                                                          |                         |
| A_23_P216199 | -1.21 | 7.14E-03 | NM_024607       | Hs.458513 | PPP1R3B   | protein phosphatase 1, regulatory (inhibitor) subunit 3B                                                    |                         |
| A_23_P26367  | 1.23  | 2.51E-02 | AK022393        | Hs.661121 | FLJ12331  | ribosomal protein S2 pseudogene                                                                             |                         |
| A_23_P2904   | 1.24  | 1.14E-02 | AK000041        | Hs.675410 | C14orf113 | chromosome 14 open reading frame 113                                                                        |                         |
| A_23_P302550 | -1.26 | 2.98E-02 | NM_130782       | Hs.440890 | RGS18     | regulator of G-protein signaling 18                                                                         |                         |
| A_23_P319050 | 1.21  | 4.19E-02 | BC006408        | Hs.656558 | ZNF493    | zinc finger protein 493                                                                                     |                         |
| A_23_P340148 | -1.23 | 1.30E-02 | NM_021998       | Hs.326801 | ZNF711    | zinc finger protein 711                                                                                     |                         |
| A_23_P343826 | 1.20  | 1.61E-03 | NM_033449       | Hs.591257 | FCHSD1    | FCH and double SH3 domains 1                                                                                |                         |
| A_23_P347027 | 1.22  | 2.56E-03 | NM_018667       | Hs.368421 | SMPD3     | sphingomyelin phosphodiesterase 3, neutral membrane (neutral sphingomyelinase II)                           |                         |
| A_23_P352484 | -1.27 | 3.03E-02 | NM_152721       | Hs.569915 | DOK6      | docking protein 6                                                                                           |                         |
| A_23_P37505  | -1.25 | 1.26E-02 | NM_130810       | Hs.126403 | DYX1C1    | dyslexia susceptibility 1 candidate 1                                                                       |                         |
| A_23_P396934 | 1.47  | 3.50E-04 | ENST00000309447 | Hs.4280   | KIAA1239  | KIAA1239                                                                                                    |                         |
| A_23_P402765 | 1.27  | 1.52E-02 | NM_198060       | Hs.268788 | NRAP      | nebulin-related anchoring                                                                                   |                         |

|              |       |          |              |           |           |                                                         |  |
|--------------|-------|----------|--------------|-----------|-----------|---------------------------------------------------------|--|
|              |       |          |              |           |           | protein                                                 |  |
| A_23_P43979  | 1.25  | 2.95E-02 | M87790       | Hs.449585 |           |                                                         |  |
| A_23_P717    | 1.22  | 1.71E-04 | NM_018252    | Hs.445386 | TMEM206   | transmembrane protein 206                               |  |
| A_23_P77697  | 1.22  | 2.33E-02 | AK131087     |           | POL3S     | polymerase 3                                            |  |
| A_23_P87727  | -1.26 | 4.13E-03 | NM_033328    | Hs.131288 | CAPZA3    | capping protein (actin filament) muscle Z-line, alpha 3 |  |
| A_24_P126246 | 1.21  | 1.73E-02 |              |           |           |                                                         |  |
| A_24_P128741 | -1.21 | 2.85E-03 | THC2558699   |           |           |                                                         |  |
| A_24_P165205 | -1.29 | 8.10E-03 | NM_024848    | Hs.709528 | MORN1     | MORN repeat containing 1                                |  |
| A_24_P168398 | -1.29 | 4.18E-04 | NM_003451    | Hs.172979 | ZNF177    | zinc finger protein 177                                 |  |
| A_24_P169092 | -1.23 | 6.76E-04 | NM_032427    | Hs.428214 | MAML2     | mastermind-like 2 (Drosophila)                          |  |
| A_24_P178723 | 1.23  | 1.05E-02 |              |           |           |                                                         |  |
| A_24_P194755 | -1.25 | 2.83E-02 | NM_032853    | Hs.515016 | MUM1      | melanoma associated antigen (mutated) 1                 |  |
| A_24_P247303 | -1.31 | 2.55E-02 |              |           |           |                                                         |  |
| A_24_P273360 | 1.26  | 4.34E-03 | AF234262     |           |           |                                                         |  |
| A_24_P282083 | 1.22  | 7.71E-03 | AK097085     | Hs.660415 |           |                                                         |  |
| A_24_P320727 | -1.35 | 8.33E-03 | NM_152748    | Hs.208093 | KIAA1324L | KIAA1324-like                                           |  |
| A_24_P331918 | -1.24 | 5.22E-03 | NM_001848    | Hs.474053 | COL6A1    | collagen, type VI, alpha 1                              |  |
| A_24_P381029 | 1.28  | 3.68E-02 | NM_006541    | Hs.42644  | GLRX3     | glutaredoxin 3                                          |  |
| A_24_P411561 | -1.23 | 3.46E-02 | NM_032782    | Hs.710500 | HAVCR2    | hepatitis A virus cellular receptor 2                   |  |
| A_24_P535380 | 1.22  | 2.41E-03 | AK025323     | Hs.671557 |           |                                                         |  |
| A_24_P569791 | 1.22  | 3.08E-02 | AI682237     | Hs.439122 |           |                                                         |  |
| A_24_P601511 | 1.28  | 1.15E-02 | AK090762     | Hs.531632 |           |                                                         |  |
| A_24_P60680  | 1.26  | 5.50E-04 | NM_013941    | Hs.631997 | OR10C1    | olfactory receptor, family 10, subfamily C, member 1    |  |
| A_24_P686965 | 1.25  | 3.20E-02 | NM_001103161 | Hs.591522 | SH2D5     | SH2 domain containing 5                                 |  |
| A_24_P705167 | 1.23  | 3.50E-02 |              |           |           |                                                         |  |
| A_24_P77904  | -1.20 | 1.25E-02 | NM_018951    | Hs.592166 | HOXA10    | homeobox A10                                            |  |
| A_24_P79529  | -1.20 | 4.99E-02 | NM_001080848 | Hs.522810 | CSAG2     | CSAG family, member 2                                   |  |
| A_24_P822704 | 1.22  | 1.34E-02 | NM_001005209 | Hs.446664 | TMEM198   | transmembrane protein 198                               |  |
| A_24_P867702 | 1.24  | 3.26E-02 |              |           |           |                                                         |  |
| A_24_P892612 | -1.31 | 4.85E-03 | AL833309     | Hs.622596 |           |                                                         |  |
| A_24_P896765 | -1.23 | 2.20E-02 | THC2667205   |           |           |                                                         |  |
| A_24_P928765 | 1.20  | 4.54E-03 | BC032716     | Hs.698373 |           |                                                         |  |
| A_24_P932981 | 1.27  | 4.37E-02 | BC015987     | Hs.709396 |           |                                                         |  |
| A_24_P934832 | -1.31 | 2.39E-02 | N34499       | Hs.655670 |           |                                                         |  |
| A_32_P12504  | 1.20  | 1.03E-03 | BC024745     |           |           |                                                         |  |
| A_32_P129810 | 1.21  | 1.95E-03 | AK098511     | Hs.633049 |           |                                                         |  |
| A_32_P14762  | -1.45 | 8.02E-03 | NM_0010805   | Hs.671212 | OOEP      | oocyte expressed protein                                |  |

|              |       |          | 07              |           |           | homolog (dog)                                |  |
|--------------|-------|----------|-----------------|-----------|-----------|----------------------------------------------|--|
| A_32_P164477 | -1.21 | 4.23E-03 | AI379175        | Hs.493819 |           |                                              |  |
| A_32_P176902 | -1.27 | 3.39E-02 |                 |           |           |                                              |  |
| A_32_P178724 | 1.24  | 8.63E-04 |                 |           |           |                                              |  |
| A_32_P191120 | 1.22  | 1.42E-03 | THC2744687      |           |           |                                              |  |
| A_32_P213661 | -1.24 | 9.58E-03 | NM_144974       | Hs.170849 | CCDC122   | coiled-coil domain containing 122            |  |
| A_32_P220591 | 1.36  | 1.69E-02 | THC2732746      |           |           |                                              |  |
| A_32_P22654  | -1.55 | 9.14E-03 | NM_000032       | Hs.522666 | ALAS2     | aminolevulinate, delta-, synthase 2          |  |
| A_32_P233735 | 1.32  | 6.79E-03 | NM_020704       | Hs.489988 | FAM40B    | family with sequence similarity 40, member B |  |
| A_32_P24382  | 1.21  | 4.90E-02 | BC063625        | Hs.406714 | KRTAP2-4  | keratin associated protein 2-4               |  |
| A_32_P25065  | 1.30  | 1.88E-02 |                 |           |           |                                              |  |
| A_32_P25243  | 1.26  | 1.07E-02 | THC2656826      |           |           |                                              |  |
| A_32_P30238  | -1.28 | 7.35E-03 | THC2719486      |           |           |                                              |  |
| A_32_P32116  | 1.27  | 2.31E-02 | ENST00000357816 | Hs.528335 | FAM123A   | family with sequence similarity 123A         |  |
| A_32_P3572   | -1.21 | 3.71E-02 | XM_001130623    | Hs.116176 | LOC645733 | similar to hCG1812929                        |  |
| A_32_P49764  | -1.23 | 2.75E-04 | CX788817        | Hs.120377 |           |                                              |  |
| A_32_P53212  | -1.24 | 3.05E-02 | AA045093        | Hs.130438 |           |                                              |  |
| A_32_P60709  | 1.21  | 4.20E-03 | THC2663783      |           |           |                                              |  |
| A_32_P94631  | 1.26  | 7.44E-03 | THC2659561      |           |           |                                              |  |

**Table S5.** Common genes in the meta-gene list and the cloned color gene list

| ID        | Symbol  | Entrez Gene Name                                                        | Location            | Type(s)                    |
|-----------|---------|-------------------------------------------------------------------------|---------------------|----------------------------|
| Hs.150749 | BCL2    | B-cell CLL/lymphoma 2                                                   | Cytoplasm           | transporter                |
| Hs.82002  | EDNRB   | endothelin receptor type B                                              | Plasma Membrane     | G-protein coupled receptor |
| Hs.101915 | ELOVL4  | ELOVL fatty acid elongase 4                                             | Cytoplasm           | enzyme                     |
| Hs.533683 | FGFR2   | fibroblast growth factor receptor 2                                     | Plasma Membrane     | kinase                     |
| Hs.524134 | GATA3   | GATA binding protein 3                                                  | Nucleus             | transcription regulator    |
| Hs.269782 | GNAQ    | guanine nucleotide binding protein (G protein), q polypeptide           | Plasma Membrane     | enzyme                     |
| Hs.74124  | GPR143  | G protein-coupled receptor 143                                          | Plasma Membrane     | G-protein coupled receptor |
| Hs.404568 | HPS1    | Hermansky-Pudlak syndrome 1                                             | Cytoplasm           | other                      |
| Hs.654610 | KRT4    | keratin 4                                                               | Cytoplasm           | other                      |
| Hs.513829 | MC1R    | melanocortin 1 receptor (alpha melanocyte stimulating hormone receptor) | Plasma Membrane     | G-protein coupled receptor |
| Hs.709755 | MREG    | melanoregulin                                                           | Cytoplasm           | other                      |
| Hs.21213  | MYO5A   | myosin VA (heavy chain 12, myosin)                                      | Cytoplasm           | enzyme                     |
| Hs.226780 | OSTM1   | osteopetrosis associated transmembrane protein 1                        | Cytoplasm           | other                      |
| Hs.42146  | PAX3    | paired box 3                                                            | Nucleus             | transcription regulator    |
| Hs.570855 | PDGFC   | platelet derived growth factor C                                        | Extracellular Space | growth factor              |
| Hs.278962 | SLC45A2 | solute carrier family 45, member 2                                      | Plasma Membrane     | other                      |
| Hs.518438 | SOX2    | SRY (sex determining region Y)-box 2                                    | Nucleus             | transcription regulator    |
| Hs.146196 | TBX15   | T-box 15                                                                | Nucleus             | transcription regulator    |
| Hs.701968 | TIMP3   | TIMP metalloproteinase inhibitor 3                                      | Extracellular Space | other                      |
| Hs.503555 | TYR     | tyrosinase                                                              | Cytoplasm           | enzyme                     |
| Hs.270279 | TYRP1   | tyrosinase-related protein 1                                            | Cytoplasm           | enzyme                     |
| Hs.370422 | VLDLR   | very low density lipoprotein receptor                                   | Plasma Membrane     | transporter                |

**Table S6.** Meta-genes that occur in the human melanosome proteomics database

| Protein AC | Gene Symbol | Group                                                         | Protein.Name                                                                                                                                                                                                                                                  |
|------------|-------------|---------------------------------------------------------------|---------------------------------------------------------------------------------------------------------------------------------------------------------------------------------------------------------------------------------------------------------------|
| P16671     | CD36        | Platelet                                                      | Platelet glycoprotein 4 (Platelet glycoprotein IV) (GPIV) (Glycoprotein IIIb) (GPIIIB) (Leukocyte differentiation antigen CD36) (CD36 antigen) (PAS IV) (PAS-4 protein) (Platelet collagen receptor) (Fatty acid translocase) (FAT) (Thrombospondin receptor) |
| P51795     | CLCN5       | Skmel28_stage1                                                | Chloride channel protein 5 (ClC-5)                                                                                                                                                                                                                            |
| Q9ULM6     | CNOT6       | MNT1_stage4; unique_latestage                                 | CCR4-NOT transcription complex subunit 6 (EC 3.1.-.-) (Cytoplasmic deadenylase) (Carbon catabolite repressor protein 4 homolog) (CCR4 carbon catabolite repression 4-like)                                                                                    |
| P50416     | CPT1A       | MNT1_stage2; Platelet                                         | Carnitine O-palmitoyltransferase I, liver isoform (EC 2.3.1.21) (CPT I) (CPTI-L) (Carnitine palmitoyltransferase 1A)                                                                                                                                          |
| Q9H3G5     | CPVL        | MNT1_stage1; MNT1_stage2; MNT1_stage4; commonMNT1; uniqueMNT1 | Probable serine carboxypeptidase CPVL precursor (EC 3.4.16.-) (Carboxypeptidase, vitellogenic-like) (Vitellogenic carboxypeptidase-like protein) (VCP-like protein) (HVLp)                                                                                    |
| P04080     | CYTB        | MNT1_stage4; unique_latestage                                 | Cystatin B (Liver thiol proteinase inhibitor) (CPI-B) (Stefin B)                                                                                                                                                                                              |
| P24530     | EDNRB       | MNT1_stage1; MNT1_stage2; Skmel28_stage1; commonB             | Endothelin B receptor precursor (ET-B) (Endothelin receptor Non- selective type)                                                                                                                                                                              |
| Q13642     | FHL1        | MNT1_stage1                                                   | Four and a half LIM domains protein 1 (FHL-1) (Skeletal muscle LIM- protein 1) (SLIM 1) (SLIM)                                                                                                                                                                |
| P50148     | GNAQ        | MNT1_stage2; Skmel28_stage2; commonA                          | Guanine nucleotide-binding protein G(q) subunit alpha (Guanine nucleotide-binding protein alpha-q)                                                                                                                                                            |
| O14964     | HGS         | MNT1_stage2                                                   | Hepatocyte growth factor-regulated tyrosine kinase substrate (Protein pp110) (Hrs)                                                                                                                                                                            |
| P05362     | ICAM1       | Skmel28_stage1; Skmel28_stage2; commonSkmel28; uniqueSkmel28  | Intercellular adhesion molecule 1 precursor (ICAM-1) (Major group rhinovirus receptor) (CD54 antigen)                                                                                                                                                         |
| O95373     | IPO7        | MNT1_stage4; Skmel28_stage2                                   | Importin-7 (Imp7) (Ran-binding protein 7) (RanBP7)                                                                                                                                                                                                            |
| P35749     | MYH11       | MNT1_stage1; MNT1_stage2; MNT1_stage4; Skmel28_stage1;        | Myosin-11 (Myosin heavy chain, smooth muscle isoform) (SMMHC)                                                                                                                                                                                                 |

|        |       |                                                                                                                                                                                            |                                                                                                                                                                                                     |
|--------|-------|--------------------------------------------------------------------------------------------------------------------------------------------------------------------------------------------|-----------------------------------------------------------------------------------------------------------------------------------------------------------------------------------------------------|
|        |       | Skmel28_stage2;<br>commonA;<br>commonB;<br>commonMNT1;<br>commonSkmel28;<br>common_all_stage;<br>common_early_stage                                                                        |                                                                                                                                                                                                     |
| Q9Y4I1 | MYO5A | MNT1_stage2;<br>MNT1_stage4                                                                                                                                                                | Myosin-5A (Myosin Va) (Dilute myosin heavy chain, non-muscle) (Myosin heavy chain 12) (Myoxin)                                                                                                      |
| Q86WC4 | OSTM1 | MNT1_stage1;<br>MNT1_stage2;<br>Skmel28_stage1;<br>commonB                                                                                                                                 | Osteopetrosis-associated transmembrane protein 1 precursor                                                                                                                                          |
| P11217 | PYGM  | Skmel28_stage1;<br>Skmel28_stage2;<br>commonSkmel28;<br>uniqueSkmel28                                                                                                                      | Glycogen phosphorylase, muscle form (EC 2.4.1.1) (Myophosphorylase)                                                                                                                                 |
| Q16769 | QPCT  | Skmel28_stage1                                                                                                                                                                             | Glutaminyl-peptide cyclotransferase precursor (EC 2.3.2.5) (QC) (Glutaminyl-tRNA cyclotransferase) (Glutaminyl cyclase)                                                                             |
| Q13637 | RAB32 | GTPase;<br>MNT1_stage1;<br>MNT1_stage2;<br>Skmel28_stage2;<br>commonA                                                                                                                      | Ras-related protein Rab-32                                                                                                                                                                          |
| Q96D15 | RCN3  | Skmel28_stage1                                                                                                                                                                             | Reticulocalbin-3 precursor (EF-hand calcium-binding protein RLP49)                                                                                                                                  |
| O94804 | STK10 | MNT1_stage4;<br>unique_latestage                                                                                                                                                           | Serine/threonine-protein kinase 10 (EC 2.7.11.1) (Lymphocyte-oriented kinase)                                                                                                                       |
| P35625 | TIMP3 | Skmel28_stage1;<br>Skmel28_stage2;<br>commonSkmel28;<br>uniqueSkmel28                                                                                                                      | Metalloproteinase inhibitor 3 precursor (TIMP-3) (Tissue inhibitor of metalloproteinases 3) (Protein MIG-5)                                                                                         |
| O14773 | TPP1  | MNT1_stage1;<br>MNT1_stage2;<br>MNT1_stage4; NG;<br>Skmel28_stage1;<br>Skmel28_stage2;<br>commonA;<br>commonB;<br>commonMNT1;<br>commonSkmel28;<br>common_all_stage;<br>common_early_stage | Tripeptidyl-peptidase 1 precursor (EC 3.4.14.9) (Tripeptidyl-peptidase I) (TPP-I) (Tripeptidyl aminopeptidase) (Lysosomal pepstatin insensitive protease) (LPIC) (Growth-inhibiting gene 1 protein) |
| P17643 | TYRP1 | MNT1_stage1;<br>MNT1_stage2;<br>MNT1_stage4;<br>commonMNT1;<br>uniqueMNT1                                                                                                                  | 5,6-dihydroxyindole-2-carboxylic acid oxidase precursor (EC 1.14.18.-) (DHICA oxidase) (Tyrosinase-related protein 1) (TRP-1) (TRP1) (TRP) (Catalase B) (Glycoprotein 75) (Melanoma antigen gp75)   |

**Table S7a.** Enriched Biological processes identified by the meta-gene analysis

| GOBPID             | Pvalue   | Odds Ratio | Term                                                                                      | Involved_Gene                                                                                                                       |
|--------------------|----------|------------|-------------------------------------------------------------------------------------------|-------------------------------------------------------------------------------------------------------------------------------------|
| <b>GO: 0002504</b> | 6.77E-18 | 76.43      | antigen processing and presentation of peptide or polysaccharide antigen via MHC class II | HLA-DQB1,HLA-DRB3,THBS1,HLA-DPB1,HLA-DOA,HLA-DOB,HLA-DQA1,HLA-DPA1,HLA-DRB5,HLA-DQA2,HLA-DMA,CD74,HLA-DRB1,HLA-DRB4,HLA-DMB,HLA-DRA |
| <b>GO: 0002604</b> | 3.94E-04 | 18.77      | regulation of dendritic cell antigen processing and presentation                          | THBS1,CCR7,NOD2,CD74                                                                                                                |
| <b>GO: 0042438</b> | 6.81E-04 | 15.01      | melanin biosynthetic process                                                              | SILV,SLC45A2,TYR,TYRP1                                                                                                              |
| <b>GO: 0018149</b> | 2.15E-05 | 8.88       | peptide cross-linking                                                                     | SPRR1B,CSTA,THBS1,SPRR1A,SPRR3,TGM1,ANXA1,F13A1                                                                                     |
| <b>GO:2000107</b>  | 9.16E-04 | 8.54       | negative regulation of leukocyte apoptosis                                                | CCL5,CXCL12,CCR7,NOD2,CD74                                                                                                          |
| <b>GO: 0048066</b> | 3.45E-06 | 8.22       | developmental pigmentation                                                                | MREG,BCL2L11,HPS1,SLC45A2,EDNRB,TYR,GPR143,TYRP1,FOXD1,GNAQ                                                                         |
| <b>GO: 0060333</b> | 4.48E-11 | 7.75       | interferon-gamma-mediated signaling pathway                                               | HLA-DQB1,HSP90AB1,HLA-DRB3,ICAM1,HLA-DPB1,HLA-DOA,HLA-DOB,HLA-DQA1,HLA-                                                             |

|                    |          |      |                                                                    |                                                                                                                                                                                                                                                                  |
|--------------------|----------|------|--------------------------------------------------------------------|------------------------------------------------------------------------------------------------------------------------------------------------------------------------------------------------------------------------------------------------------------------|
|                    |          |      |                                                                    | DPA1,HLA-DRB5,CIIITA,HLA-A,IRF1,HLA-DQA2,HLA-DMA,PTAFR,OAS1,HLA-DRB1,HLA-DRB4,HLA-DMB,HLA-DRA                                                                                                                                                                    |
| <b>GO: 0031295</b> | 3.72E-09 | 7.02 | T cell costimulation                                               | CD86,HLA-DQB1,PIK3R1,HLA-DRB3,HLA-DPB1,HLA-DOA,HLA-DOB,HLA-DQA1,HLA-DPA1,HLA-DRB5,CCR7,VAV1,HLA-DQA2,HLA-DMA,HLA-DRB1,HLA-DRB4,HLA-DMB,HLA-DRA                                                                                                                   |
| <b>GO: 0030318</b> | 8.12E-04 | 6.64 | melanocyte differentiation                                         | MREG,HPS1,EDNRB,TYRP1,FOXD1,GNAQ                                                                                                                                                                                                                                 |
| <b>GO: 0034341</b> | 9.83E-11 | 6.15 | response to interferon-gamma                                       | HLA-DQB1,HSP90AB1,HLA-DRB3,CCL5,ICAM1,HLA-DPB1,TLR3,HLA-DOA,HLA-DOB,HLA-DQA1,HLA-DPA1,HLA-DRB5,CIIITA,CYP27B1,HLA-A,IRF1,HLA-DQA2,HLA-DMA,PTAFR,OAS1,HLA-DRB1,HLA-DRB4,HLA-DMB,HLA-DRA                                                                           |
| <b>GO: 0032655</b> | 7.69E-04 | 5.49 | regulation of interleukin-12 production                            | CD36,THBS1,TLR3,CCR7,IRF1,NOD2,CD40                                                                                                                                                                                                                              |
| <b>GO: 0050852</b> | 8.12E-08 | 5.18 | T cell receptor signaling pathway                                  | SKAP1,FYB,PTPRC,HLA-DQB1,PIK3R1,HLA-DRB3,HLA-DPB1,HLA-DOA,HLA-DOB,HLA-DQA1,HLA-DPA1,HLA-DRB5,HLA-DQA2,HLA-DMA,GATA3,HLA-DRB1,HLA-DRB4,HLA-DMB,HLA-DRA                                                                                                            |
| <b>GO: 0001952</b> | 6.50E-04 | 4.86 | regulation of cell-matrix adhesion                                 | CD36,ROCK1,EFNA5,CDK6,THBS1,PLAU,CCR7,ACVR L1                                                                                                                                                                                                                    |
| <b>GO: 0002429</b> | 6.35E-08 | 4.53 | immune response-activating cell surface receptor signaling pathway | SKAP1,FYB,PTPRC,HLA-DQB1,PIK3R1,HLA-DRB3,VAV3,PRKCB1,BCL2,HLA-DPB1,HLA-DOA,HLA-DOB,HLA-DQA1,HLA-DPA1,HLA-DRB5,HLA-DQA2,HLA-DMA,GATA3,HLA-DRB1,HLA-DRB4,HLA-DMB,HLA-DRA                                                                                           |
| <b>GO: 0002685</b> | 2.21E-04 | 4.16 | regulation of leukocyte migration                                  | HMOX1,BDKRB1,CCL5,ICAM1,CXCL12,THBS1,CCR7,NOD2,CD74,VEGFA,STK10                                                                                                                                                                                                  |
| <b>GO: 0051251</b> | 5.03E-08 | 3.60 | positive regulation of lymphocyte activation                       | CD86,PTPRC,HLA-DQB1,PIK3R1,HLA-DRB3,TNFSF13,CCL5,VAV3,HPS1,BCL2,HLA-DPB1,HLA-DOA,HLA-DOB,HLA-DQA1,HLA-DPA1,HLA-DRB5,CCR7,VAV1,NOD2,HLA-DQA2,HLA-DMA,IL6ST,CD40,CD74,GATA3,HLA-DRB1,HLA-DRB4,HLA-DMB,HLA-DRA                                                      |
| <b>GO: 0071345</b> | 3.34E-10 | 3.60 | cellular response to cytokine stimulus                             | KLF2,PTPRC,LIFR,HLA-DQB1,CHI3L1,HSP90AB1,HLA-DRB3,CCL5,ICAM1,LRP8,CXCL12,EGR1,HLA-DPB1,TLR3,HLA-DOA,STAT4,HLA-DOB,HLA-DQA1,HLA-DPA1,HLA-DRB5,CIIITA,TNFRSF11A,HLA-A,IRF1,HLA-DQA2,HLA-DMA,VLDLR,IFI27,IL6ST,PTAFR,DUOX1,SLIT3,KLF6,CD74,IL2RB,HLA-DRB1,HLA-DRB4, |
| <b>GO: 0050867</b> | 4.67E-08 | 3.44 | positive regulation of cell activation                             | CD86,PTPRC,HLA-DQB1,PIK3R1,HLA-DRB3,TNFSF13,CCL5,VAV3,HPS1,THBS1,BCL2,PLEK,HLA-DPB1,HLA-DOA,HLA-DOB,HLA-DQA1,HLA-DPA1,HLA-DRB5,CCR7,VAV1,NOD2,HLA-DQA2,HLA-DMA,IL6ST,CD40,CD74,GATA3,HLA-DRB1,HLA-DRB4,HLA-DMB,HLA-DRA                                           |
| <b>GO: 0030216</b> | 9.64E-04 | 3.40 | keratinocyte differentiation                                       | WNT16,SPRR1B,CSTA,SPRR1A,CYP27B1,LCE3C,SPR R3,TGM1,ANXA1,RP1-21018.1,FLG                                                                                                                                                                                         |
| <b>GO: 0002764</b> | 3.17E-07 | 3.26 | immune response-regulating signaling pathway                       | SKAP1,CD86,FYB,PTPRC,HLA-DQB1,PIK3R1,HLA-DRB3,VAV3,PRKCB1,MAP2K6,BCL2,HLA-DPB1,TLR3,HLA-DOA,HLA-DOB,HLA-DQA1,HLA-DPA1,HLA-DRB5,RPS6KA2,NOD2,HLA-DQA2,HLA-DMA,CD40,GATA3,TNFAIP3,HLA-DRB1,HLA-DRB4,HLA-DMB,HLA-DRA                                                |
| <b>GO: 0050863</b> | 4.29E-06 | 3.02 | regulation of T cell activation                                    | CD86,PTPRC,HLA-DQB1,PIK3R1,HLA-DRB3,CCL5,HLA-DPB1,HLA-DOA,HLA-DOB,HLA-DQA1,HLA-DPA1,HLA-DRB5,CCR7,FOXJ1,VAV1,NOD2,HLA-DQA2,HLA-DMA,LAX1,IL6ST,CD74,GATA3,HLA-DRB1,HLA-DRB4,HLA-DMB,HLA-DRA                                                                       |
| <b>GO: 0021700</b> | 1.76E-04 | 3.02 | developmental maturation                                           | MREG,KLF2,BARX2,BTK,PCSK4,SCLT1,PPARD,EDN RB,CCR7,ERBB4,NEUROD2,CNTN2,VEGFA,FARP2,MAP1B,ACVRL1,GNAQ                                                                                                                                                              |
| <b>GO: 0000302</b> | 7.72E-04 | 2.94 | response to reactive oxygen species                                | CD36,KLF2,HMOX1,FBLN5,BMP7,SDC1,HBB,HBA2,ERBB4,UCP2,RHOB,DUOX1,ANXA1,SLC8A1                                                                                                                                                                                      |

|                    |          |      |                                              |                                                                                                                                                                                                                                                                 |
|--------------------|----------|------|----------------------------------------------|-----------------------------------------------------------------------------------------------------------------------------------------------------------------------------------------------------------------------------------------------------------------|
| <b>GO: 0002694</b> | 3.52E-07 | 2.86 | regulation of leukocyte activation           | CD86,HMOX1,PTPRC,HLA-DQB1,PTPRE, PIK3R1, HLA-DRB3, TNFSF13,CCL5, VAV3,HPS1,THBS1,BCL2,HLA-DPB1,HLA-DOA,HLA-DOB,HLA-DQA1,HLA-DPA1,HLA-DRB5, CCR7,FOXJ1,VAV1,NOD2,HLA-DQA2, HLA-DMA , LAX1, IL6ST,CD40, CD74,GATA3,TNFAIP3, HLA-DRB1,HLA-DRB4, HLA-DMB,HLA-DRA    |
| <b>GO: 0050678</b> | 6.68E-05 | 2.86 | regulation of epithelial cell proliferation  | SERPINF1,NR4A1,FOXP2,ECM1,CDK6,FGFR2,CDKN1B,THBS1,PPARD,NFIB,CDKN2B,KRT4,KGFLP1,TGFA,SOX2,NOD2,ERBB4,VEGFA,OSR2,GATA3,ACVRL1                                                                                                                                    |
| <b>GO: 0002253</b> | 7.96E-07 | 2.85 | activation of immune response                | SKAP1,CD86,FYB,PTPRC,C1R,C2,HLA-DQB1,SERPING1,PIK3R1,HSP90AB1,HLA-DRB3,VAV3,PRKCB1,MAP2K6,BCL2,CLU,HLA-DPB1,TLR3,HLA-DOA,HLA-DOB,HLA-DQA1,HLA-DPA1,HLA-DRB5,RPS6KA2,NOD2,HLA-DQA2,HLA-DMA,GATA3,TNFAIP3,HLA-DRB1,HLA-DRB4,HLA-DMB,HLA-DRA                       |
| <b>GO: 0008544</b> | 1.67E-05 | 2.71 | epidermis development                        | MREG,CALML5,KRTAP5-9,BARX2,SNAI1,WNT16,KRT9,KRT25,SPRR1B,CSTA,FGFR2,PPARD,HPSE,SPRR1A,CYP27B1,KGFLP1,KRT16,KLK7,LCE3C,FABP5,SPRR3,TGM1,LAMA3,ANXA1,KRT71,RP1-21O18.1,FLG                                                                                        |
| <b>GO: 0002250</b> | 5.80E-04 | 2.69 | adaptive immune response                     | PTPRC,C1R,C2,SERPING1,GCNT3,TNFSF13,ICAM1,CLU,FOXJ1,TNFRSF11A,NOD2,IL6ST,CD40,CD74,VEGFA,TNFAIP3,CD8A                                                                                                                                                           |
| <b>GO: 0030155</b> | 3.07E-04 | 2.46 | regulation of cell adhesion                  | CD36,PDE3B,ROCK1,NRG1,CCL5,ICAM1,VWC2,EFNA5,CDK6,VAV3,THBS1,PLAU,PRSS2,CCR7,NUAK1,VAV1,CYR61,VEGFA,TESC,LAMA3,PSCDBP,ACVRL1                                                                                                                                     |
| <b>GO: 0031589</b> | 9.04E-04 | 2.42 | cell-substrate adhesion                      | CD36,ITGBL1,ITGB8,ROCK1,FBLN5,BCL2L11,VWC2,EFNA5,CDK6,THBS1,AXL,PPARD,PLAU,HPSE,CCR7,FREM1,CYR61,CNTN2,ACVRL1                                                                                                                                                   |
| <b>GO: 0042060</b> | 3.17E-08 | 2.34 | wound healing                                | CD36,FMOD,PDE3B,HMOX1,APBB1IP,NRG1,SERPING1,PIK3R1,ADRB2,DOCK11,SDC1,TFPI,KIF3B,LRP8,VAV3,HPS1,HBB,SCARB1,SLC7A8,THBS1,PRKCB1,AXL,PLEK,TMPRSS6,F2R,PPARD,CLU,PLAU,ENTPD1,HPSE,GP6,PDE9A,PTGIR,INA,CD84,TSPAN8,KGFLP1,TGFA,P2RY1,VAV1,TIMP3,IRF1,PRKAR2B,S100A8, |
| <b>GO: 0032101</b> | 1.19E-04 | 2.34 | regulation of response to external stimulus  | SERPINF1,CD36,SERPING1,ADRB2,CCL5,CXCL12,THBS1,PLEK,TMPRSS6,F2R,PLAU,HPSE,TLR3,PLA2G2A,PLXNA4,CCR7,CYP27B1,TSPAN8,KLK8,TNFRSF11A,CALCRL,NOD2,IL6ST,CD74,VEGFA,GATA3,ANXA1,TNFAIP3                                                                               |
| <b>GO: 0002684</b> | 6.66E-07 | 2.33 | positive regulation of immune system process | SKAP1,CD86,CD36,HMOX1,FYB,PTPRC,C1R,BDKRB1,C2,HLA-DQB1,SERPING1,PIK3R1,HSP90AB1,HLA-DRB3,TNFSF13,CCL5,ICAM1,VAV3,HPS1,CXCL12,THBS1,PRKCB1,MAP2K6,BCL2,CLU,HLA-DPB1,TLR3,HLA-DOA,HLA-DOB,HLA-DQA1,HLA-DPA1,HLA-DRB5,RPS6KA2,CCR7,FOXJ1,VAV1,NOD2,HLA-DQA2,HLA-DM |
| <b>GO: 0006952</b> | 3.42E-07 | 2.28 | defense response                             | CD86,CD36,SPON2,PTPRC,C1R,TBKBP1,C2,HLA-DQB1,HSP90AB1,HLA-DRB3,ICAM1,INHBB,CD8B,CREBBP,MAP2K6,SOC56,BCL2,SP140,EGR1,CLU,IFIT2,HLA-DPB1,TYROBP,RNASE6,HLA-DOA,HLA-DOB,HLA-DQA1,HLA-DPA1,HLA-DRB5,CIITA,RPS6KA2,CD84,CYP27B1,LILRB3,CD207,CX3CR1,HLA-A,IRF1,HLA-D |
| <b>GO: 0006955</b> | 1.65E-08 | 2.19 | immune response                              | SKAP1,IGSF6,CD86,CD36,CD70,HMOX1,SPON2,FYB,TBKBP1,HLA-DQB1,PIK3R1,HSP90AB1,HLA-DRB3,PTGER4,CCL5,CD8B,PRG4,CREBBP,ICAM3,VAV3,MR1,ZEB1,CXCL12,LCP1,THBS1,PRKCB1,MAP2K6,BCL2,EGR1,IFIT2,HLA-DPB1,CCL13,TYROBP,TLR3,HLA-DOA,BDKRB2,HLA-DOB,HLA-DQA1,HLA-DPA1,HLA-DR |
| <b>GO: 0030168</b> | 9.04E-04 | 2.16 | platelet activation                          | CD36,PDE3B,SERPING1,PIK3R1,LRP8,VAV3,THBS1,PRKCB1,AXL,PLEK,F2R,CLU,GP6,PDE9A,PTGIR,P2RY1,VAV1,RHOB,CD40,KCNMB4,VEGFA,SLC8A1,GNAQ,F13A1                                                                                                                          |

|                    |          |      |                                                         |                                                                                                                                                                                                                                                                  |
|--------------------|----------|------|---------------------------------------------------------|------------------------------------------------------------------------------------------------------------------------------------------------------------------------------------------------------------------------------------------------------------------|
| <b>GO: 0006954</b> | 9.14E-05 | 2.10 | inflammatory response                                   | SERPINF1,HMOX1,BDKRB1,SERPING1,ADRB2,CCL5,XCR1,THBS1,AXL,F2R,AIF1,CYSLTR1,CCL13,ALOX5AP,TLR3,NDST1,BDKRB2,CXCL2,PLA2G2A,LY75,CCR7,CCL3,TNFRSF11A,CALCRL,NOD2,S100A8,IL6ST,PTAFR,CCL18,CD40,LY86,GATA3,ANXA1,TNFAIP3,CXCL3,LTC4S,BLNK                             |
| <b>GO: 0070887</b> | 1.19E-09 | 2.08 | cellular response to chemical stimulus                  | SMOX,PAPSS2,CD36,CYP4B1,PDE3B,KLF2,HMOX1,PTPRC,NR4A1,LIFR,WNT16,HLA-DQB1,CHI3L1,PTPRE,PIK3R1,HSP90AB1,HLA-DRB3,LTK,FBLN5,CCL5,ICAM1,INHBB,BMP7,REST,EFNA5,LRP8,ZEB1,FGFR2,CXCL12,HBB,CDKN1B,CAB39L,THBS1,CYP4F3,CYP26B1,EGR1,AIF1,PPARD,CLU,CDKN2B,IFIT2,HLA-DP  |
| <b>GO: 0007155</b> | 2.59E-05 | 2.00 | cell adhesion                                           | ANXA9,PGM5,CRNN,SPON2,TMEM49,BARX2,DSG2,CDH12,MPZL2,TNXB,DLG5,MFAP4,ICAM3,CXCL12,SCARB1,SSPN,SIGLEC10,PLEK,PCDHB2,COL4A6,CDH23,FBLIM1,ENTPD1,CNTN3,RPSA,MLLT4,BOC,COL2A1,CD33,LAMB4,ADAM23,CD84,CLCA2,CX3CR1,ALCAM,CLDN8,TTYH1,RHOB,TPBG,PCDHB4,HNT,CELSR3,AMI   |
| <b>GO: 0051240</b> | 4.06E-04 | 1.97 | positive regulation of multicellular organismal process | ZBTB16,ACVR2B,CD36,RGS2,HMOX1,NRG1,ADRB2,CCL5,ICAM1,INHBB,BMP7,GDNF,FGFR2,THBS1,F2R,NIPBL,AIF1,CYSLTR1,HPSE,TLR3,CCR7,P2RY1,TNFRSF11A,NOD2,ERBB4,IL6ST,CD40,CD74,VEGFA,OSR2,GATA3,LIPG,FOXD1,FOXS1,TBXAS1                                                        |
| <b>GO: 0007599</b> | 8.95E-05 | 1.96 | hemostasis                                              | CD36,PDE3B,APBB1IP,SERPING1,PIK3R1,DOCK11,TFPI,KIF3B,LRP8,VA V3,HPS1,HBB,SLC7A8,THBS1,PRKCB1,AXL,PLEK,TMPPRSS6,F2R,CLU,PLAU,ENTPD1,HPSE,GP6,PDE9A,PTGIR,CD84,TSPAN8,P2RY1,VAV1,IRF1,PRKAR2B,RHOB,HBG1,CD40,KCNMB4,VEGFA,GATA3,PRKAR1B,HBD,SLC8A1,FLI1,GNAQ,F13A1 |
| <b>GO: 0006935</b> | 8.22E-05 | 1.91 | chemotaxis                                              | SPON2,PTPRC,NR4A1,ROCK1,HSP90AB1,CSNK2A2,CCL5,BMP7,EFNA5,GDNF,XCR1,CXCL12,THBS1,MYH11,FPR3,NFIB,CYSLTR1,PLAU,BOC,CCL13,TYROBP,EDNRB,CXCL2,RPS6KA2,PLXNA4,CCR7,CCL3,TNFRSF11A,CX3CR1,ALCAM,SEMA6D,NOD2,S100A8,CYR61,RHOB,PTAFR,CCL18,SLIT3,CNTN2,CD74,VEGFA,TUBB  |
| <b>GO: 0050817</b> | 1.79E-04 | 1.91 | coagulation                                             | CD36,PDE3B,APBB1IP,SERPING1,PIK3R1,DOCK11,TFPI,KIF3B,LRP8,VA V3,HPS1,HBB,SLC7A8,THBS1,PRKCB1,AXL,PLEK,TMPPRSS6,F2R,CLU,PLAU,ENTPD1,HPSE,GP6,PDE9A,PTGIR,CD84,TSPAN8,P2RY1,VAV1,IRF1,PRKAR2B,RHOB,HBG1,CD40,KCNMB4,VEGFA,GATA3,PRKAR1B,HBD,SLC8A1,GNAQ,F13A1      |
| <b>GO: 0048584</b> | 2.19E-06 | 1.90 | positive regulation of response to stimulus             | SKAP1,ACVR2B,CD86,MSX1,CD36,SEMA4C,HMOX1,FYB,PTPRC,C1R,TCF7L2,C2,WNT16,HLA-DQB1,SERPING1,PIK3R1,ADRB2,HSP90AB1,HLA-DRB3,TNFSF13,CCL5,BMP7,ECM1,TNFRSF10B,HIPK2,VAV3,FGFR2,CXCL12,THBS1,PRKCB1,MAP2K6,BCL2,F2R,PPARD,CLU,CDKN2B,RSPO1,ITSN1,HPSE,HLA-DPB1,TLR3,H  |
| <b>GO: 0043069</b> | 1.59E-04 | 1.89 | negative regulation of programmed cell death            | MSX1,TERT,HMOX1,TCF7L2,ROCK1,SNAI1,LIFR,NR G1,CCL5,BMP7,TSC22D1,GDNF,HIPK2,SORT1,FGFR2,CXCL12,CDKN1B,THBS1,BCL2,AXL,F2R,AIF1,CLU,ITSN1,CLN8,TAF9B,CCR7,PIM1,TGFA,CX3CR1,NOD2,ERBB4,CYR61,MAPK8IP2,IL6ST,HTATIP2,CD74,VEGFA,GATA3,ARNT2,ANXA1,TNFAIP3,IL2RB,FOXS1 |
| <b>GO: 0007166</b> | 2.58E-07 | 1.87 | cell surface receptor linked signaling pathway          | SKAP1,APC2,IGSF6,CD36,ITGBL1,RGS2,RGS11,RASD1,SORCS2,FYB,ITGB8,PTPRC,TCF7L2,BDKRB1,WNT16,HLA-DQB1,STK4,HSP90AB1,HLA-DRB3,PFTK1,PTGER4,CSNK2A2,CCL5,ICAM1,LEPR,TNFRSF10B,SDC1,SOX7,XCR1,LRP8,PARD3,CXCL12,SCARB1,PRKCB1,MAP2K6,BCL2,PLEK,TBL1XR1,F2R,RSPO1,IFIT2  |
| <b>GO: 0010033</b> | 5.03E-08 | 1.85 | response to organic substance                           | SERPINF1,CPT1A,ACVR2B,CD36,PDE3B,KLF2,HMOX1,PTPRC,TCF7L2,NR4A1,BDKRB1,LIFR,HLA-DQB1,CHI3L1,PTPRE,PIK3R1,HSP90AB1,HLA-DRB3,CCL5,ICAM1,INHBB,BMP7,REST,EFNA5,SDC1,XCR1,LRP8,PFKFB2,SORT1,ZEB1,FGFR2,CXCL12,CC                                                      |



|                    |          |      |                                                    |                                                                                                                                                                                                                                                                                                                                                                                                                                                                                                                               |
|--------------------|----------|------|----------------------------------------------------|-------------------------------------------------------------------------------------------------------------------------------------------------------------------------------------------------------------------------------------------------------------------------------------------------------------------------------------------------------------------------------------------------------------------------------------------------------------------------------------------------------------------------------|
|                    |          |      |                                                    | ND1,SCARB1,CDKN1B,CAB39L,THBS1,BCL2,BCHE,F2R,EGR1,AI                                                                                                                                                                                                                                                                                                                                                                                                                                                                          |
| <b>GO: 0008284</b> | 3.20E-04 | 1.83 | positive regulation of cell proliferation          | CD86,CRIP2,HMOX1,PTPRC,NR4A1,LIFR,FOXP2,NRG1,ADRB2,TNFSF13,CCL5,ECM1,TSC22D1,CDK6,HIPK2,HIG2,VAV3,FGFR2,CCND1,CDKN1B,BCL2,F2R,EGR1,AIF1,PPARD,CLU,HPSE,ATF3,HOXC10,KGFLP1,TGFA,E2F3,TNFRSF11A,CALCRL,NOD2,ERBB4,CYR61,IL6ST,CD40,PDGFC,CD74,VEGFA,OSR2,PGF,ARNT                                                                                                                                                                                                                                                               |
| <b>GO: 0051707</b> | 9.43E-04 | 1.80 | response to other organism                         | CD86,CD36,PTPRC,BDKRB1,CCL5,ICAM1,BCL2L11,CD8B,CDK6,CXCL12,SCARB1,BCL2,F2R,CLU,IFIT2,TLR3,CXCL2,PLA2G2A,CYP27B1,TNFRSF11A,CD207,CX3CR1,HLA-A,IL28A,NOD2,VLDLR,S100A8,PTAFR,CD40,OAS1,DCN,WFDC12,GATA3,DEFA6,MAOB,TNFAIP3,HCK,LTC4S,CD8A                                                                                                                                                                                                                                                                                       |
| <b>GO: 0009605</b> | 3.99E-05 | 1.76 | response to external stimulus                      | HMOX1,SPON2,PTPRC,NR4A1,ROCK1,FOXP2,NEURL,WIP1,HSP90AB1,LTK,CSNK2A2,ICAM1,INHBB,BMP7,EFNA5,GDNF,TNFRSF10B,XCR1,ZEB1,CCND1,MYH11,BCL2,FPR3,AXL,BCHE,AIF1,CTSB,NFIB,CDKN2B,CYSLTR1,PSPH,BOC,CCL13,TYROBP,EDNRB,CXCL2,RPS6KA2,CCL3,P2RY1,TIMP3,CX3CR1,ALCAM,IRF1,SERPINF1,ZBTB16,ACVR2B,CD86,CD36,HMOX1,TCF7L2,SNAI1,NRG1,ADRB2,CCL5,BMP7,VWC2,ECM1,GDNF,ZEB1,FGFR2,THBS1,MAP2K6,PPARD,CLU,CDKN2B,USP2,BOC,PLA2G2A,CYP27B1,CX3CR1,HEYL,CYR61,NEUROD2,IL6ST,RHOB,CD74,VEGFA,OSR2,GATA3,TESC,SOX5,AMIGO1,CDON,FOXO1,MAP1B          |
| <b>GO: 0051094</b> | 9.89E-04 | 1.75 | positive regulation of developmental process       | SLC9A7,HMOX1,PTPRC,BDKRB1,SLC4A11,ADRB2,MTL5,MAL,XCR1,CXCL12,SLC7A8,BCL2,F2R,PPARD,CDH23,CYSLTR1,CCL13,EDNRB,SLC30A3,BDKRB2,CCR7,CYP27B1,KLK8,CCL3,TGFA,P2RY1,PYGM,STEAP2,MAPK8IP2,IL6ST,GJC3,CNTN2,KCNMB4,SLC4A1,CD52,ANPEP,AMIGO1,SLC8A1,CNIH2,TBXAS1,NFASC,ACVR2B,MSX1,CSF1R,FMOD,PDE3B,MPZL1,NR4A1,KIDINS220,LIFR,NRG1,AKAP13,PTPRE,PIK3R1,ADRB2,LTK,CILP,INHBB,BCL2L11,BMP7,VWC2,ROR2,CD8B,EFNA5,HIPK2,VAV3,SORT1,FGFR2,CDKN1B,CAB39L,THBS1,AXL,EGR1,CDKN2B,ID1,ITSN1,GP6,NDST1,BDKRB2,GREM2,RPS6KA2,TGFA,VAV1,ERBB4,PRK |
| <b>GO: 0050801</b> | 9.74E-04 | 1.74 | ion homeostasis                                    | PAPSS2,ANKRD2,MREG,CD86,CRIP2,FMOD,SPI1,PDE3B,RPL3L,KLF2,CALML5,KRTAP5-9,BARX2,SNAI1,ELF5,ADRB2,TNFSF13,ICAM1,INHBB,BCL2L11,KRT9,KRT25,SPRR1B,SDC1,CSTA,SORT1,HP1,CCND1,CDKN1B,LCP1,GJB2,FANCA,PAX3,PLEK,L3MBTL,LPCAT1,F2R,CTSB,CDKN2B,FHL1,USP2,NPR3,RPSA,HPS                                                                                                                                                                                                                                                                |
| <b>GO: 0007167</b> | 2.36E-04 | 1.71 | enzyme linked receptor protein signaling pathway   | SERPINF1,ACVR2B,MSX1,CHM,HMOX1,ITGB8,TCF7L2,NR4A1,WNT16,NRG1,MRE11A,CCL5,BMP7,BCOR,ECM1,REST,VAV3,FGFR2,THBS1,MYH11,TMPRSS6,NIPBL,EGR1,CSPG4,PLAU,ID1,BSS5,TNNT2,FOXJ1,TGFA,PLXDC1,CALCRL,CX3CR1,TNFAIP2,ERBB4,HEYL,VLDLR,CYR61,RHOB,HTATIP2,VEGFA,GATA3,PGF,AN                                                                                                                                                                                                                                                               |
| <b>GO: 0048731</b> | 3.97E-05 | 1.70 | system development                                 | SERPINF1,ZBTB16,ACVR2B,CD86,SPI1,HMOX1,TCF7L2,SNAI1,FOXP2,NRG1,ADRB2,LTK,TNFSF13,CCL5,BMP7,VWC2,BCOR,ECM1,REST,GDNF,CDK6,ZEB1,FGFR2,CDKN1B,THBS1,L3MBTL,NIPBL,EGR1,NFIB,CDKN2B,USP2,ID1,HPSE,BOC,EDNRB,TLR3,PLXNA4,FOXJ1,CYP27B1,KLK8,KGFLP1,SOX2,CX3CR1,SSH1,SLC9A7,TERT,SPI1,PDE3B,KLF2,HMOX1,PTPRC,TCF7L2,BDKRB1,SLC4A11,ADRB2,MRE11A,CCL5,ICAM1,BCL2L11,MTL5,CREBBP,TXNDC13,EFNA5,CDK6,MAL,XCR1,CXCL12,SCARB1,SLC7A8,BCL2,AXL,F2R,PPARD,CDH23,CYSLTR1,CCL13,EDNRB,SLC30A3,BDKRB2,MYLIP,PIF1,CCR7,CYP27B1,KLK8,KGFLP1,CCL3 |
| <b>GO: 0072358</b> | 9.81E-04 | 1.69 | cardiovascular system development                  | HMOX1,SPON2,PTPRC,NR4A1,BDKRB1,SYNE2,ROCK1,SNAI1,NEURL,PIK3R1,HSP90AB1,CSNK2A2,CCL5,ICAM1,BMP7,ROR2,EFNA5,GDNF,XCR1,LRP8,VAV3,CXCL12,SCARB1,SLC7A8,THBS1,MYH11,FPR3,AXL,F2R,AIF1,PPARD,NFIB,CYSLTR1,PLAU,ID1,BOC,CCL13,                                                                                                                                                                                                                                                                                                       |
| <b>GO:2000026</b>  | 3.54E-04 | 1.65 | regulation of multicellular organismal development |                                                                                                                                                                                                                                                                                                                                                                                                                                                                                                                               |
| <b>GO: 0042592</b> | 1.48E-04 | 1.64 | homeostatic process                                |                                                                                                                                                                                                                                                                                                                                                                                                                                                                                                                               |
| <b>GO: 0040011</b> | 9.83E-05 | 1.64 | locomotion                                         |                                                                                                                                                                                                                                                                                                                                                                                                                                                                                                                               |

|                    |          |      |                                  |                                                                                                                                                                                                                                                                                         |
|--------------------|----------|------|----------------------------------|-----------------------------------------------------------------------------------------------------------------------------------------------------------------------------------------------------------------------------------------------------------------------------------------|
|                    |          |      |                                  | GP6,TYROBP,EDNRB,CXCL2,RPS6KA2,PLXNA4,CC                                                                                                                                                                                                                                                |
| <b>GO: 0010646</b> | 8.01E-04 | 1.51 | regulation of cell communication | APC2,CPT1A,ACVR2B,MSX1,CD36,SEMA4C,RGS2,PD<br>E3B,CPLX3,RGS11,HMOX1,PTPRC,TCF7L2,SNAI1,WN<br>T16,PTPRE,STK4,ADRB2,CILP,CCL5,INHBB,BMP7,V<br>WC2,ECM1,REST,EFNA5,GDNF,TNFRSF10B,HIPK2,PF<br>KFB2,FGFR2,THBS1,PRKCB1,SOCS6,PLEK,CYP26B1,<br>BCH,E,F2R,EGR1,PPARD,CDKN2B,RSPO1,ITSN1,HP    |
| <b>GO: 0023052</b> | 4.89E-07 | 1.50 | signaling                        | SKAP1,APC2,CPT1A,PGDS,IGSF6,ACVR2B,CD86,MSX<br>1,CSF1R,CD36,FIBCD1,ITGBL1,SEMA4C,RHO,FMOD<br>,RGS2,TRIM63,PDE3B,CPLX3,CRABP1,RGS11,RASD1,<br>MPZL1,CD70,HMOX1,SORCS2,FYB,CENTB5,ITGB8,P<br>TPRC,CALML5,APBB1IP,TCF7L2,NR4A1,BDKRB1,RO<br>CK1,KIDINS220,SNAI1,LIFR,WNT16,NRG1,HLA-D      |
| <b>GO: 0030154</b> | 6.08E-05 | 1.47 | cell differentiation             | SERPINF1,ZBTB16,MREG,ACVR2B,CD86,MSX1,CD36,<br>SEMA4C,RGS2,SPI1,KLF2,UPK1A,SPON2,PTPRC,HLX,<br>TCF7L2,SEMA4G,ROCK1,BARX2,SNAI1,LIFR,WNT16,<br>ELF5,NRG1,BTK,NEURL,NDRG4,HSP90AB1,LTK,CSN<br>K2A2,CCL5,INHBB,BMP7,VWC2,SPRR1B,MTL5,PCSK<br>4,REST,EFNA5,GDNF,CDK6,SDC1,HIPK2,CSTA,MA     |
| <b>GO: 0007154</b> | 2.46E-05 | 1.46 | cell communication               | SKAP1,PGDS,IGSF6,CD86,CSF1R,FIBCD1,ITGBL1,RH<br>OU,FMOD,TRIM63,CRABP1,RASD1,MPZL1,CD70,SOR<br>CS2,FYB,CENTB5,ITGB8,CALML5,APBB1IP,NR4A1,B<br>DKRB1,ROCK1,KIDINS220,FRAS1,LIFR,NRG1,HLA-<br>DQB1,<br>BTK,AKAP13,IGFBP6,WIP1,PIK3R1,HSP90AB1,HLA-<br>DRB3,PFTK1,PTGER4,LTK,CSNK2A2,TENC1  |
| <b>GO: 0007399</b> | 8.52E-04 | 1.45 | nervous system development       | SERPINF1,ZBTB16,MSX1,SEMA4C,SPON2,PTPRC,TCF<br>7L2,SEMA4G,ROCK1,LIFR,FOXP2,WNT16,NRG1,NEU<br>RL,HSP90AB1,LTK,CSNK2A2,CCL5,BMP7,VWC2,RES<br>T,EFNA5,GDNF,CDK6,HIPK2,MAL,SCLT1,LRP8,TSPA<br>N2,PAR3,ZEB1,FGFR2,MYH11,BCL2,AXL,DYRK1A,<br>PCDHB2,NIPBL,PPARD,CLU,NFIB,CNTN3,GJB1,CLN8      |
| <b>GO: 0032502</b> | 3.22E-05 | 1.44 | developmental process            | PAPSS2,ANKRD2,MSX1,CSF1R,TERT,CHM,CRIP2,SE<br>MA4C,RHO,FMOD,RGS2,SPI1,PDE3B,CRABP1,RPL3<br>L,UPK1A,SPON2,ITGB8,PTPRC,CALML5,NEK1,HLX,S<br>EMA4G,NR4A1,ROCK1,KRTAP5-9,<br>LIFR,FOXP2,WNT16,ELF5,NEURL,NDRG4,STK4,HSP9<br>0AB1,LTK,CSNK2A2,MRE11A,MPZL2,TNFSF13,ICAM<br>1,INHBB,SHROOM1,  |
| <b>GO: 0032501</b> | 3.40E-04 | 1.35 | multicellular organismal process | SERPINF1,PAPSS2,ANKRD2,BEST1,MREG,CD86,MSX<br>1,CSF1R,CHM,CRIP2,SEMA4C,FMOD,SPI1,CPLX3,CR<br>ABP1,RPL3L,KLF2,SPON2,ITGB8,PTPRC,CALML5,HL<br>X,TCF7L2,SEMA4G,NR4A1,SLC15A1,BDKRB1,TRPM1<br>,ROCK1,KRTAP5-<br>9,BARX2,SNAI1,LIFR,FOXP2,WNT16,ELF5,NEURL,N<br>DRG4,HSP90AB1,PTGER4,LTK,CSN |

**Table S7b.** Enriched cellular components identified by the meta-gene analysis

| GOCCID      | Pvalue   | Odds Ratio | Term                         | Involved_Gene                                                                                                                                                 |
|-------------|----------|------------|------------------------------|---------------------------------------------------------------------------------------------------------------------------------------------------------------|
| GO: 0042613 | 2.39E-20 | Inf        | MHC class II protein complex | HLA-DQB1,HLA-DRB3,HLA-DPB1,HLA-DOA,HLA-<br>DOB,HLA-DQA1,HLA-DPA1,HLA-DRB5,HLA-<br>DQA2,HLA-DMA,CD74,HLA-DRB1,HLA-DRB4,HLA-<br>DMB,HLA-DRA                     |
| GO: 0033162 | 0.000359 | 19.24      | melanosome membrane          | SLC45A2,TYR,GPR143,TYRP1                                                                                                                                      |
| GO: 0005833 | 0.000107 | 16.06      | hemoglobin complex           | HBB,HBA2,CYB5R3,HBG1,HBD                                                                                                                                      |
| GO: 0001533 | 0.000163 | 9.64       | cornified envelope           | SPRR1B,CSTA,SPRR1A,TGM1,ANXA1,RP1-21O18.1                                                                                                                     |
| GO: 0045095 | 0.000443 | 4.12       | keratin filament             | KRTAP5-9,KRTAP1-1,KRTAP2-4,KRT9,KRTAP4-<br>12,KRT4,KRT74,KRTAP4-4,KRT71,KRT77                                                                                 |
| GO: 0005765 | 1.23E-05 | 3.65       | lysosomal membrane           | HLA-DQB1,HLA-DRB3,SORT1,HPSE,HLA-DPB1,HLA-<br>DOA,HLA-DOB,HLA-DQA1,HLA-DPA1,HLA-<br>DRB5,HLA-DQA2,HLA-DMA,GPR143,LAPTM5,HLA-<br>DRB1,HLA-DRB4,HLA-DMB,HLA-DRA |
| GO: 0044437 | 2.05E-05 | 3.03       | vacuolar part                | TMEM49,HLA-DQB1,WIP1,HLA-<br>DRB3,SORT1,HPSE,HLA-DPB1,HLA-DOA,HLA-                                                                                            |

|             |          |      |                                    |                                                                                                                                                                                                                                                                                                                                                                                                                                                                                                                                 |
|-------------|----------|------|------------------------------------|---------------------------------------------------------------------------------------------------------------------------------------------------------------------------------------------------------------------------------------------------------------------------------------------------------------------------------------------------------------------------------------------------------------------------------------------------------------------------------------------------------------------------------|
| GO: 0045111 | 9.17E-05 | 2.87 | intermediate filament cytoskeleton | DOB,HLA-DQA1,HLA-DPA1,HLA-DRB5,HLA-DQA2,HLA-DMA,GPR143,LAPTM5,HLA-DRB1,HLA-DRB4,TPP1,HLA-DMB,ATG9B,HLA-DRA<br>KRTAP5-9,PTPRE,KRTAP1-1,KRTAP19-1,KRTAP2-4,KRT9,KRT25,KRTAP4-12,KRT4,INA,KRT74,KRT16,KRTAP4-4,TACC1,PCDHB4,KRT33B,KRT71,FLG,KRT77,KRT28<br>SLC9A7,HLA-DQB1,WIP1,HLA-DRB3, SORT1, SILV,HLA-DPB1,TLR3,HLA-DOA,HLA-DOB,HLA-DQA1,HLA-DPA1,HLA-DRB5,CLCN5,CD1A,HLA-A,HLA-DQA2,HLA-DMA,STEAP2,RHOB,CD1C,HGS,SNX10, TYRP1,HLA-DRB1,HLA-DRB4,HLA-DMB,HLA-DRA                                                              |
| GO: 0010008 | 9.16E-05 | 2.37 | endosome membrane                  | HLA-DQB1,ADRB2,HLA-DRB3, SORT1,HPS1,USP6,CTSB,HPSE,HLA-DPB1,HLA-DOA,HLA-DOB,HLA-DQA1,HLA-DPA1,HLA-DRB5,TYR,ANXA11,TSPAN8,PPT2,HLA-DQA2,HLA-DMA,GPR143,CTSS,CD74,LAPTM5,HLA-DRB1,HLA-DRB4,TPP1,HLA-DMB,HLA-DRA                                                                                                                                                                                                                                                                                                                   |
| GO: 0000323 | 8.29E-05 | 2.35 | lytic vacuole                      | PTPRH,APC2,FCER1A,BEST1,IGSF6,MREG,SLC5A3,PGM5,ACVR2B,CD86,CSF1R,CD36,PAR3B,ITGBL1,RHOU,RGS2,TM7SF2,RGS11,MPZL1,CD70,UPK1A,HMOX1,ITGB8,PTPRC,APBB1IP,SLC15A1,BDKRB1,SYNE2,TRPM1,LIFR,CSF2RA,NRG1,HLA-DQB1,PLA2R1,SLC4A11,ADRB2,HSP90AB1,HLA-DRB3,LTK,CGN,TSPAN                                                                                                                                                                                                                                                                  |
| GO: 0044459 | 2.19E-11 | 1.93 | plasma membrane part               | PTPRH,FCER1A,IGSF6,SLC5A3,ACVR2B,CSF1R,CD36,ITGBL1,TM7SF2,MPZL1,CD70,ITGB8,PTPRC,SLC15A1,BDKRB1,TRPM1,LIFR,CSF2RA,PLA2R1,ADRB2,HLA-DRB3,LTK,TSPAN9,SLC16A6,ICAM1,ROR2,ABCC2,CD8B,ICAM3,SDC1,MAL,XCR1,HPS1,SCARB1,SSPN,SLC7A8,AXL,PCDHB2,F2R,CEACAM6,CSPG4,CYSLT                                                                                                                                                                                                                                                                 |
| GO: 0005887 | 1.32E-07 | 1.87 | integral to plasma membrane        | SERPINF1,FIBCD1,FMOD,CD70,HMOX1,C2,WNT16,NRG1,CHI3L1,SERPINF1,IGFBP6,PLA2R1,FBLN5,CILP,TNFSF13,CCL5,ICAM1,BMP7,TNXXB,VWC2,SMPDL3B,FAM3B,IL1F9,TFPI,HIG2,CXCL12,THBS1,BCHE,CLU,CTSB,RSPO1,PLAU,OVOS2,CCL13,PRSS2,CXCL2,PLA2G2A,GREM2,KLK8,KGFLP1,CCL3,TGFA,PRSS1,SKAP1,PTPRH,APC2,FCER1A,BEST1,IGSF6,MREG,SLC5A3,PGM5,ACVR2B,CD86,SC4MOL,CSF1R,CD36,LYNX1,PAR3B,ITGBL1,SEMA4C,RHOU,RGS2,TM7SF2,CPLX3,RGS11,RASD1,MPZL1,CD70,UPK1A,HMOX1,ITGB8,PTPRC,APBB1IP,SLC15A1,BDKRB1,SYNE2,TRPM1,PRSS21,TMEM49,FRAS1,LIFR,WNT16,CSF2RA,NRG |
| GO: 0005615 | 3.97E-05 | 1.80 | extracellular space                | SERPINF1,SCUBE2,HTRA3,METRNL,PRSS27,LYNX1,FIBCD1,CRIP2,ITGBL1,FMOD,CD70,HMOX1,SPON2,C1R,LIFR,C2,WNT16,CSF2RA,NRG1,CHI3L1,SERPINF1,IGFBP6,KRTAP1-1,PLA2R1,PRSS23,FBLN5,CILP,TNFSF13,CCL5,ICAM1,INHBB,BMP7,TNXXB,GPLD1,VWC2,CD8B,PRG4,ECM1,SMPDL3B,LEPR,MFAP4,FAM3                                                                                                                                                                                                                                                                |
| GO: 0071944 | 8.67E-12 | 1.73 | cell periphery                     | PTPRH,FCER1A,CPT1A,BEST1,IGSF6,SLC5A3,PIK3IP1,ACVR2B,CD86,SC4MOL,SLC9A7,CSF1R,CD36,LYNX1,FIBCD1,ITGBL1,SEMA4C,TM7SF2,PDE3B,MPZL1,CD70,UPK1A,SORCS2,ITGB8,PTPRC,SEMA4G,MPEG1,SLC15A1,BDKRB1,SYNE2,TRPM1,PRSS21,TMEM49,CD302,KIDINS220,FRAS1,LIFR,ARV1,CSF2RA,NRG                                                                                                                                                                                                                                                                 |
| GO: 0005576 | 1.12E-05 | 1.56 | extracellular region               | SKAP1,PTPRH,APC2,FCER1A,CPT1A,BEST1,IGSF6,MREG,SLC5A3,PIK3IP1,PGM5,ACVR2B,CD86,SC4MOL,SLC9A7,CSF1R,FKBP5,CD36,LYNX1,FIBCD1,PAR3B,ITGBL1,SEMA4C,CYP4B1,RHOU,RGS2,CRNN,TM7SF2,PDE3B,CPLX3,RGS11,RASD1,MPZL1,CD70,UPK1A,HMOX1,SORCS2,ITGB8,PTPRC,APBB1IP,SEMA4G,M                                                                                                                                                                                                                                                                  |
| GO: 0031224 | 8.8E-07  | 1.46 | intrinsic to membrane              |                                                                                                                                                                                                                                                                                                                                                                                                                                                                                                                                 |
| GO: 0016020 | 4.51E-07 | 1.45 | membrane                           |                                                                                                                                                                                                                                                                                                                                                                                                                                                                                                                                 |

**Table S7c.** Enriched molecular functions identified by the meta-gene analysis

| GOMFID      | Pvalue   | Odds Ratio | Term                           | Involved Gene                                                                                                                                                                                                                                                                                                                                             |
|-------------|----------|------------|--------------------------------|-----------------------------------------------------------------------------------------------------------------------------------------------------------------------------------------------------------------------------------------------------------------------------------------------------------------------------------------------------------|
| GO: 0032395 | 7.54E-14 | Inf        | MHC class II receptor activity | HLA-DQB1,HLA-DRB3,HLA-DOA,HLA-DOB,HLA-DQA1,HLA-DPA1,HLA-DQA2,HLA-DRB1,HLA-DRB4,HLA-DRA<br>PTPRH,ANXA9,IGSF6,ACVR2B,CD86,CSF1R,CD36,SORCS2,PTPRC,NR4A1,BDKRB1,LIFR,CSF2RA,HLA-DQB1,PTPRE,ADRB2,HLA-DRB3,PTGER4,LTK,ICAM1,ROR2,CD8B,LEPR,XCR1,LRP8,SORT1,MR1,FGFR2,SCARB1,FPR3,AXL,F2R,PPARD,CYSLTR1,NPR3,GP6,EDNRB,TLR3,HLA-DOA,BDKRB2,HLA-DOB,HLA-DQA1,HL |
| GO: 0038023 | 1.84E-05 | 1.76       | signaling receptor activity    | PTPRH,ANXA9,IGSF6,ACVR2B,CD86,CSF1R,CD36,RGS2,TRIM63,RGS11,HMOX1,SORCS2,PTPRC,NR4A1,BDKRB1,LIFR,CSF2RA,HLA-DQB1,AKAP13,PTPRE,ADRB2,HLA-DRB3,PTGER4,LTK,ICAM1,ROR2,CD8B,ECM1,LEPR,CREBBP,XCR1,LRP8,SORT1,MR1,FGFR2,CXCL12,SCARB1,CDKN1B,FPR3,AXL,F2R,PPARD,CSPG4                                                                                           |
| GO: 0060089 | 1.33E-06 | 1.75       | molecular transducer activity  |                                                                                                                                                                                                                                                                                                                                                           |

**Table S8a.** Top 10 activated upstream regulators identified by the meta-gene analysis

| Upstream Regulator | Fold Change | Molecule Type           | Predicted Activation State | Activation z-score | p-value of overlap |
|--------------------|-------------|-------------------------|----------------------------|--------------------|--------------------|
| MITF               | 1.214       | transcription regulator | Activated                  | 2.660              | 5.47E-09           |
| EGFR               | -1.034      | kinase                  | Activated                  | 2.220              | 1.55E-08           |
| SMAD7              | -1.051      | transcription regulator | Activated                  | 2.417              | 1.07E-04           |
| ERBB2              | -1.019      | kinase                  | Activated                  | 2.037              | 1.24E-04           |
| ERBB3              | -1.027      | kinase                  | Activated                  | 2.094              | 4.19E-04           |
| FAS                | -1.063      | transmembrane receptor  | Activated                  | 2.123              | 6.35E-04           |
| SCD                | 1.416       | enzyme                  | Activated                  | 2.784              | 2.84E-03           |
| Sod                |             | group                   | Activated                  | 2.000              | 3.14E-03           |
| SREBF1             | 1.112       | transcription regulator | Activated                  | 2.228              | 5.29E-03           |
| SOX11              |             | transcription regulator | Activated                  | 2.219              | 8.48E-03           |

**Table S8b.** Top 10 inhibited upstream regulators identified by the meta-gene analysis

| Upstream Regulator | Fold Change | Molecule Type              | Predicted Activation State | Activation z-score | p-value of overlap |
|--------------------|-------------|----------------------------|----------------------------|--------------------|--------------------|
| TNF                | -1.178      | cytokine                   | Inhibited                  | -2.764             | 3.10E-11           |
| IFNG               |             | cytokine                   | Inhibited                  | -2.439             | 3.19E-10           |
| AGT                | -1.220      | growth factor              | Inhibited                  | -2.157             | 5.51E-10           |
| IL27               | -1.104      | cytokine                   | Inhibited                  | -2.938             | 3.73E-08           |
| IL1B               | -1.197      | cytokine                   | Inhibited                  | -3.910             | 6.20E-08           |
| IL13               |             | cytokine                   | Inhibited                  | -2.112             | 9.57E-08           |
| CHITA              | -1.514      | transcription regulator    | Inhibited                  | -2.452             | 2.10E-07           |
| EBI3               |             | cytokine                   | Inhibited                  | -2.744             | 3.63E-07           |
| TLR4               | -1.364      | transmembrane receptor     | Inhibited                  | -3.002             | 4.66E-07           |
| F2R                | -1.242      | G-protein coupled receptor | Inhibited                  | -2.676             | 9.72E-07           |

**Table S9.** Gene Probes included in cluster 26

| <b>ID</b>    | <b>Symbol</b> | <b>Entrez Gene Name</b>                                                 | <b>Location</b>     | <b>Type(s)</b>             | <b>Drug(s)</b>                    |
|--------------|---------------|-------------------------------------------------------------------------|---------------------|----------------------------|-----------------------------------|
| A_23_P209731 | ARMC9         | armadillo repeat containing 9                                           | Other               | other                      |                                   |
| A_23_P209735 | ARMC9         | armadillo repeat containing 9                                           | Other               | other                      |                                   |
| A_23_P83579  | ARNT2         | aryl-hydrocarbon receptor nuclear translocator 2                        | Nucleus             | transcription regulator    |                                   |
| A_23_P104996 | BEST1         | bestrophin 1                                                            | Plasma Membrane     | ion channel                |                                   |
| A_24_P100277 | CYB5R3        | cytochrome b5 reductase 3                                               | Cytoplasm           | enzyme                     |                                   |
| A_23_P2831   | EDNRB         | endothelin receptor type B                                              | Plasma Membrane     | G-protein coupled receptor | bosentan, sitaxsentan, atrasentan |
| A_23_P348636 | FOXJ1         | forkhead box J1                                                         | Nucleus             | transcription regulator    |                                   |
| A_32_P19294  | GLT1D1        | glycosyltransferase 1 domain containing 1                               | Extracellular Space | enzyme                     |                                   |
| A_24_P277657 | GMPR          | guanosine monophosphate reductase                                       | Cytoplasm           | enzyme                     |                                   |
| A_23_P45560  | GPR143        | G protein-coupled receptor 143                                          | Plasma Membrane     | G-protein coupled receptor |                                   |
| A_23_P217704 | GYG2          | glycogenin 2                                                            | Cytoplasm           | enzyme                     |                                   |
| A_23_P388200 | KDEL2         | KDEL (Lys-Asp-Glu-Leu) containing 2                                     | Other               | other                      |                                   |
| A_23_P302595 | LINC00518     | long intergenic non-protein coding RNA 518                              | Other               | other                      |                                   |
| A_32_P219581 | LOC440934     | uncharacterized LOC440934                                               | Other               | other                      |                                   |
| A_23_P14853  | LTK           | leukocyte receptor tyrosine kinase                                      | Plasma Membrane     | kinase                     | pazopanib                         |
| A_23_P334173 | LY75          | lymphocyte antigen 75                                                   | Plasma Membrane     | transmembrane receptor     |                                   |
| A_23_P329271 | MC1R          | melanocortin 1 receptor (alpha melanocyte stimulating hormone receptor) | Plasma Membrane     | G-protein coupled receptor |                                   |
| A_24_P165205 | MORN1         | MORN repeat containing 1                                                | Other               | other                      |                                   |
| A_23_P502706 | PAX3          | paired box 3                                                            | Nucleus             | transcription regulator    |                                   |
| A_23_P76992  | PGF           | placental growth factor                                                 | Extracellular Space | growth factor              | aflibercept                       |
| A_23_P2233   | PMEL          | premelanosome protein                                                   | Plasma Membrane     | enzyme                     |                                   |
| A_23_P312851 | PMEL          | premelanosome protein                                                   | Plasma Membrane     | enzyme                     |                                   |
| A_24_P347411 | POSTN         | periostin, osteoblast specific factor                                   | Extracellular Space | other                      |                                   |
| A_23_P335920 | RPS6KA2       | ribosomal protein S6 kinase, 90kDa, polypeptide 2                       | Nucleus             | kinase                     |                                   |
| A_24_P232158 | SCARA3        | scavenger receptor class A, member 3                                    | Plasma Membrane     | transmembrane receptor     |                                   |
| A_23_P203900 | SCARB1        | scavenger receptor class B, member 1                                    | Plasma Membrane     | transporter                |                                   |
| A_24_P925186 | SOX5          | SRY (sex determining region Y)-box 5                                    | Nucleus             | transcription regulator    |                                   |
| A_24_P25354  | TACC1         | transforming, acidic coiled-coil containing protein 1                   | Nucleus             | other                      |                                   |
| A_23_P428326 | TBC1D16       | TBC1 domain family, member 16                                           | Extracellular Space | other                      |                                   |
| A_23_P114983 | TRIM63        | tripartite motif containing 63, E3 ubiquitin protein ligase             | Nucleus             | enzyme                     |                                   |
| A_23_P129225 | TRPM1         | transient receptor potential cation channel, subfamily M, member 1      | Plasma Membrane     | ion channel                |                                   |
| A_24_P314477 | TUBB2B        | tubulin, beta 2B class IIB                                              | Cytoplasm           | other                      | brentuximab vedotin, cabazitaxel  |
| A_32_P194062 | TYR           | tyrosinase                                                              | Cytoplasm           | enzyme                     | hydroquinone, azelaic acid        |
| A_23_P94403  | TYRP1         | tyrosinase-related protein 1                                            | Cytoplasm           | enzyme                     |                                   |

| ProbeID      | Fold change |       |       |       |        | P value  |          |          |
|--------------|-------------|-------|-------|-------|--------|----------|----------|----------|
|              | LLP         | UV    | PIH   | AS    | Ethnic | LLP      | UV       | PIH      |
| A_23_P55270  | 22.32       | 6.39  | 1.01  | -1.10 | 9.98   | 3.57E-04 | 4.04E-04 | 9.58E-01 |
| A_23_P15786  | 2.28        | 1.03  | 7.77  | 9.84  | 4.85   | 4.36E-01 | 9.48E-01 | 2.12E-02 |
| A_24_P23546  | -7.56       | -1.19 | -2.42 | -3.68 | -2.16  | 2.87E-04 | 3.64E-01 | 1.02E-03 |
| A_23_P94403  | 6.42        | 6.69  | 1.77  | 1.06  | 1.20   | 7.94E-05 | 6.14E-05 | 2.81E-04 |
| A_23_P312851 | 5.38        | 5.97  | 1.87  | 1.16  | -1.02  | 1.56E-04 | 1.80E-04 | 2.99E-05 |
| A_32_P25295  | -3.58       | -1.03 | -2.74 | -2.38 | -3.11  | 4.62E-02 | 8.90E-01 | 1.14E-04 |
| A_23_P2233   | 4.76        | 5.63  | 1.76  | 1.23  | -1.04  | 7.06E-05 | 2.28E-04 | 1.14E-05 |
| A_23_P42811  | -1.62       | -1.58 | -3.85 | -3.26 | -1.36  | 1.86E-01 | 8.57E-02 | 2.45E-05 |
| A_24_P271696 | -3.68       | -2.33 | -2.81 | 1.28  | -2.20  | 8.66E-03 | 2.42E-03 | 2.28E-05 |
| A_32_P156237 | 1.92        | -1.17 | 3.16  | 1.99  | 4.36   | 7.82E-02 | 2.45E-01 | 1.85E-04 |
| A_24_P184803 | -2.35       | -2.60 | -1.24 | -4.21 | -1.11  | 2.06E-01 | 6.43E-03 | 4.62E-01 |
| A_32_P183765 | -2.48       | -1.73 | -2.55 | -1.48 | -2.55  | 7.43E-02 | 1.25E-02 | 7.58E-04 |
| A_23_P302595 | 3.49        | 3.26  | 1.68  | 1.35  | 1.07   | 4.81E-03 | 1.36E-03 | 2.25E-02 |
| A_24_P151005 | 3.08        | 1.01  | 5.40  | 1.43  | 1.45   | 1.50E-01 | 9.80E-01 | 3.08E-03 |
| A_23_P22398  | -4.17       | -3.69 | -1.10 | -1.21 | -1.41  | 1.51E-04 | 1.12E-03 | 2.03E-01 |
| A_23_P45560  | 3.00        | 3.63  | 1.66  | 1.15  | 1.20   | 5.79E-04 | 1.00E-03 | 4.17E-04 |
| A_32_P31144  | 7.23        | 2.47  | 1.39  | 1.47  | -1.05  | 3.02E-03 | 6.35E-02 | 1.42E-01 |
| A_24_P142305 | -1.08       | -1.27 | -1.96 | -2.53 | -1.78  | 8.75E-01 | 6.14E-01 | 9.19E-02 |
| A_23_P79108  | 1.78        | -1.27 | 1.41  | 4.01  | 3.39   | 1.62E-01 | 3.88E-01 | 8.56E-02 |
| A_32_P165047 | 3.73        | 3.64  | 1.59  | 1.09  | 1.01   | 1.42E-04 | 9.54E-05 | 4.54E-04 |
| A_23_P26457  | 1.04        | -1.60 | -1.78 | -2.72 | -1.76  | 9.37E-01 | 3.12E-01 | 1.38E-01 |
| A_32_P194062 | 4.32        | 4.04  | 1.53  | 1.03  | -1.23  | 1.96E-04 | 2.12E-04 | 1.04E-03 |
| A_24_P367247 | 2.80        | 1.31  | 1.45  | 2.88  | 1.41   | 2.71E-02 | 4.18E-01 | 2.21E-01 |
| A_23_P2831   | 3.51        | 3.59  | 1.57  | -1.12 | 1.15   | 8.65E-05 | 1.03E-04 | 3.22E-04 |
| A_32_P191441 | 2.25        | 3.56  | -1.09 | 1.42  | 2.14   | 1.51E-02 | 7.22E-04 | 6.25E-01 |
| A_23_P129225 | 3.57        | 3.69  | 1.55  | 1.08  | -1.10  | 4.40E-04 | 6.15E-04 | 2.27E-02 |
| A_24_P196878 | 1.33        | 1.36  | 1.52  | 2.57  | 3.13   | 3.34E-01 | 1.08E-01 | 1.01E-01 |
| A_24_P184799 | -2.28       | -2.51 | 1.13  | -3.32 | -1.10  | 2.46E-01 | 1.48E-02 | 7.56E-01 |
| A_23_P93641  | 2.57        | 1.20  | 2.04  | 2.15  | 1.67   | 4.77E-02 | 4.90E-01 | 2.93E-03 |
| A_23_P209735 | 2.80        | 4.82  | 1.20  | 1.12  | 1.37   | 3.50E-03 | 2.94E-03 | 1.60E-02 |
| A_23_P159406 | 1.73        | 1.05  | 1.38  | 3.58  | 1.78   | 2.33E-01 | 8.14E-01 | 1.09E-01 |
| A_23_P347610 | 2.14        | 1.26  | 1.04  | 3.05  | 2.07   | 5.31E-02 | 3.14E-01 | 8.54E-01 |
| A_24_P129341 | 2.63        | 1.22  | 1.92  | 2.16  | 1.83   | 4.89E-02 | 3.96E-01 | 1.28E-02 |
| A_32_P10936  | 1.04        | 1.02  | -1.79 | -2.02 | -5.16  | 8.83E-01 | 9.41E-01 | 2.46E-02 |
| A_23_P114983 | 2.66        | 4.33  | 1.46  | 1.25  | -1.25  | 4.99E-03 | 5.21E-04 | 4.61E-04 |
| A_24_P277657 | 2.85        | 3.91  | 1.48  | -1.04 | 1.03   | 1.29E-03 | 6.29E-04 | 5.18E-03 |
| A_24_P363711 | -1.64       | -1.91 | -3.93 | -1.03 | -1.21  | 2.43E-01 | 8.84E-02 | 4.57E-04 |
| A_32_P61298  | -2.32       | -1.29 | -1.30 | -1.59 | -2.97  | 2.66E-02 | 2.49E-01 | 2.86E-02 |
| A_23_P84063  | -2.06       | -3.47 | -1.72 | 1.14  | -1.35  | 3.76E-03 | 8.19E-04 | 1.10E-02 |
| A_24_P251950 | -3.13       | -1.92 | -1.87 | -1.11 | -1.55  | 2.91E-02 | 1.29E-02 | 2.96E-03 |
| A_23_P37856  | 1.04        | -1.59 | -1.75 | -2.54 | 1.08   | 9.44E-01 | 3.57E-01 | 1.76E-01 |
| A_24_P314477 | 1.84        | 2.77  | 1.46  | 1.43  | 1.18   | 1.61E-02 | 8.50E-04 | 6.88E-02 |
| A_32_P189781 | 4.51        | 1.58  | 1.57  | 1.45  | 1.19   | 9.82E-03 | 1.16E-01 | 4.38E-02 |
| A_24_P367242 | 2.12        | 1.35  | -1.02 | 2.76  | 1.71   | 2.81E-02 | 4.00E-01 | 9.22E-01 |
| A_23_P204133 | 1.11        | 1.39  | 2.08  | 2.01  | 1.87   | 5.43E-01 | 4.42E-02 | 1.89E-05 |
| A_23_P51767  | -2.12       | -1.96 | -1.59 | -1.31 | -1.28  | 2.48E-02 | 3.11E-03 | 3.03E-03 |

|              |       |       |       |       |       |          |          |          |
|--------------|-------|-------|-------|-------|-------|----------|----------|----------|
| A_24_P565390 | 1.41  | 1.64  | 1.60  | 2.08  | 1.68  | 2.37E-01 | 2.18E-02 | 1.89E-02 |
| A_24_P307964 | -1.97 | -2.18 | -1.63 | -1.64 | -1.06 | 1.07E-01 | 4.29E-02 | 3.67E-02 |
| A_23_P52499  | -3.14 | -2.16 | -1.43 | 1.07  | -1.76 | 1.97E-02 | 9.20E-03 | 4.27E-02 |
| A_23_P259049 | 4.27  | 1.72  | 1.66  | 1.16  | 1.10  | 4.97E-03 | 5.23E-02 | 1.97E-02 |
| A_23_P373017 | 2.25  | 1.91  | 1.00  | 2.02  | 1.48  | 7.22E-03 | 3.76E-03 | 9.90E-01 |
| A_23_P115202 | 1.40  | 1.15  | 1.37  | 2.86  | 1.76  | 2.14E-01 | 6.23E-01 | 4.20E-02 |
| A_23_P38603  | 2.77  | 1.24  | 3.02  | 1.44  | 1.26  | 1.67E-01 | 6.05E-01 | 1.79E-02 |
| A_23_P379147 | 2.13  | 1.00  | 1.03  | 2.45  | 2.15  | 3.15E-02 | 9.80E-01 | 9.12E-01 |
| A_23_P36531  | -2.46 | -1.27 | -1.26 | -1.89 | -2.49 | 6.65E-02 | 3.18E-01 | 1.88E-01 |
| A_23_P209731 | 3.26  | 2.91  | 1.24  | 1.19  | -1.22 | 1.32E-03 | 1.77E-04 | 4.15E-02 |
| A_23_P22422  | 1.39  | 2.80  | 1.21  | 2.36  | -1.03 | 1.83E-02 | 2.19E-04 | 1.62E-01 |
| A_23_P64161  | -2.49 | -1.00 | -1.50 | -3.40 | -1.05 | 1.63E-02 | 9.66E-01 | 8.98E-03 |
| A_23_P115478 | 1.57  | 1.06  | 2.08  | 2.21  | 1.36  | 2.07E-02 | 8.03E-01 | 2.40E-03 |
| A_32_P219279 | 2.04  | 1.55  | 1.21  | 1.06  | 3.63  | 7.37E-03 | 1.11E-02 | 3.87E-01 |
| A_32_P71858  | 2.12  | 1.17  | 1.16  | 2.49  | 1.70  | 8.53E-04 | 1.69E-01 | 3.56E-01 |
| A_23_P74012  | 1.43  | 1.33  | 1.41  | 2.47  | 1.37  | 4.75E-01 | 4.72E-01 | 9.37E-02 |
| A_23_P412577 | 2.13  | 1.56  | 1.98  | -1.11 | 2.03  | 1.85E-02 | 8.28E-02 | 8.55E-05 |
| A_23_P203558 | 1.04  | -1.56 | -1.66 | -2.11 | -1.46 | 9.49E-01 | 2.81E-01 | 2.36E-01 |
| A_23_P134347 | -2.29 | -1.89 | -1.08 | -1.63 | -1.68 | 7.77E-03 | 1.66E-02 | 3.71E-01 |
| A_23_P114883 | -1.16 | -2.29 | -1.17 | -1.47 | -2.64 | 5.61E-01 | 3.90E-03 | 2.36E-01 |
| A_23_P258769 | -2.16 | -1.93 | 1.04  | -1.10 | -2.77 | 3.56E-03 | 5.12E-03 | 4.80E-01 |
| A_23_P417100 | 1.65  | 1.85  | 2.43  | 1.75  | -1.28 | 3.25E-01 | 6.87E-02 | 3.48E-02 |
| A_24_P732106 | 1.20  | 1.43  | 1.10  | 2.32  | 2.87  | 4.89E-01 | 3.53E-01 | 4.64E-01 |
| A_23_P503010 | 1.57  | 1.69  | -1.24 | 2.51  | 2.08  | 2.17E-01 | 6.49E-02 | 2.99E-01 |
| A_24_P7642   | 2.27  | 1.02  | 1.39  | 2.11  | 1.78  | 1.87E-02 | 9.21E-01 | 3.36E-03 |
| A_24_P272515 | 2.01  | 1.08  | 1.63  | 2.06  | 1.62  | 2.00E-02 | 6.08E-01 | 5.91E-04 |
| A_24_P246626 | -1.81 | -1.71 | 1.14  | -1.55 | -2.81 | 2.21E-03 | 3.41E-02 | 1.51E-01 |
| A_24_P916853 | 1.75  | 1.62  | 1.99  | 1.05  | 1.79  | 3.95E-02 | 1.10E-01 | 3.67E-05 |
| A_24_P75190  | -1.06 | -1.61 | -1.79 | -1.78 | -1.43 | 9.14E-01 | 2.94E-01 | 1.47E-01 |
| A_23_P117882 | -1.88 | 1.37  | -2.33 | -1.61 | -1.90 | 1.44E-02 | 8.88E-02 | 5.92E-08 |
| A_23_P405295 | 2.07  | 1.16  | -1.13 | 1.60  | 3.82  | 3.63E-02 | 2.92E-01 | 3.58E-01 |
| A_24_P281497 | 1.97  | -1.14 | -1.02 | 1.71  | 4.10  | 1.04E-02 | 7.69E-01 | 9.07E-01 |
| A_23_P8108   | -2.63 | -1.88 | -1.04 | -1.30 | -1.66 | 5.34E-03 | 2.30E-03 | 5.32E-01 |
| A_23_P31006  | -2.19 | -1.85 | -1.10 | -1.36 | -1.76 | 4.43E-03 | 3.29E-03 | 1.73E-01 |
| A_23_P109988 | -2.13 | -2.09 | -1.24 | -1.30 | -1.35 | 4.88E-03 | 2.27E-03 | 8.18E-02 |
| A_24_P826858 | -1.57 | -1.15 | -1.26 | -1.77 | -2.90 | 1.54E-01 | 3.66E-01 | 1.41E-01 |
| A_23_P62709  | 2.09  | -1.08 | 1.04  | 1.75  | 3.38  | 2.99E-02 | 7.17E-01 | 6.96E-01 |
| A_32_P215100 | 3.08  | 1.11  | 1.14  | 1.17  | 2.15  | 4.79E-04 | 4.74E-01 | 4.06E-01 |
| A_23_P63032  | -1.85 | -1.53 | -1.38 | -1.38 | -2.05 | 2.79E-02 | 5.31E-02 | 1.76E-02 |
| A_23_P99044  | 1.92  | 1.15  | 3.82  | 3.73  | 1.32  | 3.70E-01 | 7.24E-02 | 8.32E-03 |
| A_23_P360605 | 1.91  | 1.29  | 1.50  | 1.33  | 2.11  | 5.77E-03 | 7.33E-02 | 1.62E-02 |
| A_32_P22654  | -1.08 | -1.43 | -2.10 | -1.66 | -1.46 | 8.69E-01 | 5.64E-01 | 1.20E-01 |
| A_23_P104996 | 2.09  | 2.57  | 1.06  | 1.04  | 1.54  | 3.83E-03 | 5.03E-04 | 4.64E-01 |
| A_23_P160214 | 1.67  | 1.40  | 1.21  | 2.50  | 1.23  | 1.13E-01 | 9.94E-02 | 2.34E-01 |
| A_23_P89665  | 1.88  | 1.00  | 2.13  | 1.68  | 1.92  | 2.48E-01 | 9.89E-01 | 7.30E-02 |
| A_32_P50973  | -1.69 | -1.46 | -1.58 | -1.54 | -1.32 | 2.95E-03 | 1.46E-02 | 1.12E-02 |
| A_23_P82886  | -1.30 | -1.63 | -2.78 | -1.21 | 1.14  | 5.12E-01 | 1.24E-01 | 3.46E-04 |



|              |       |       |       |       |       |          |          |          |
|--------------|-------|-------|-------|-------|-------|----------|----------|----------|
| A_24_P124879 | 1.48  | 1.31  | 1.54  | 1.73  | 1.34  | 1.73E-01 | 3.11E-01 | 2.96E-02 |
| A_23_P61637  | 1.61  | 1.02  | 1.50  | 2.20  | 2.07  | 2.30E-01 | 8.95E-01 | 7.72E-03 |
| A_23_P250444 | 1.45  | 2.04  | 1.53  | 1.41  | 1.10  | 7.44E-02 | 2.65E-03 | 1.10E-03 |
| A_32_P128586 | 1.92  | 1.90  | 1.11  | 1.57  | 1.30  | 2.22E-03 | 1.07E-03 | 2.90E-01 |
| A_32_P158786 | 1.55  | 1.23  | 1.31  | 1.70  | 1.68  | 1.52E-01 | 2.94E-01 | 8.29E-02 |
| A_23_P77493  | 2.24  | 1.48  | 1.41  | 1.38  | 1.30  | 1.79E-04 | 4.40E-03 | 2.01E-04 |
| A_24_P799048 | 3.36  | 1.06  | 1.54  | 1.36  | 1.13  | 2.64E-04 | 4.94E-01 | 1.04E-02 |
| A_32_P89352  | -2.62 | -2.31 | -1.14 | -1.04 | -1.15 | 4.55E-04 | 3.85E-03 | 4.93E-01 |
| A_24_P166443 | -2.24 | -1.81 | 1.02  | -1.34 | -1.71 | 4.80E-03 | 9.13E-03 | 7.10E-01 |
| A_23_P68436  | 1.83  | -1.10 | 1.59  | 1.69  | 2.45  | 1.99E-01 | 7.14E-01 | 1.39E-02 |
| A_32_P27657  | 2.15  | 1.32  | -1.10 | 2.18  | 1.67  | 3.26E-02 | 2.61E-01 | 5.39E-01 |
| A_32_P19294  | -1.47 | -1.27 | -1.57 | -1.89 | -2.02 | 4.09E-02 | 6.58E-02 | 2.52E-02 |
| A_23_P42302  | -2.70 | -1.83 | -1.05 | -1.24 | -1.59 | 9.79E-03 | 2.74E-02 | 6.88E-01 |
| A_32_P84369  | -1.73 | -1.07 | -1.75 | -1.04 | -3.38 | 1.19E-01 | 8.44E-01 | 2.95E-03 |
| A_24_P402222 | -1.99 | -1.85 | 1.03  | -1.45 | -1.67 | 8.47E-03 | 2.38E-03 | 7.32E-01 |
| A_23_P125451 | -1.62 | -2.50 | -1.10 | -1.37 | -1.29 | 2.65E-02 | 2.86E-04 | 3.65E-01 |
| A_23_P33384  | -1.89 | -2.22 | 1.05  | 1.01  | -2.42 | 4.92E-02 | 6.00E-03 | 5.49E-01 |
| A_23_P63167  | -2.76 | -1.70 | -1.16 | -1.23 | -1.49 | 5.14E-03 | 4.52E-03 | 4.56E-02 |
| A_23_P16915  | 2.67  | 1.83  | 1.33  | -1.20 | 1.53  | 8.21E-04 | 1.26E-04 | 1.79E-03 |
| A_24_P231104 | -1.09 | -1.21 | -1.68 | -2.33 | -1.01 | 7.21E-01 | 7.26E-01 | 8.21E-02 |
| A_23_P42969  | -1.73 | -1.33 | -1.04 | -2.42 | -1.42 | 4.00E-02 | 2.10E-03 | 6.58E-01 |
| A_23_P252388 | -1.66 | -1.10 | -1.42 | 1.01  | -3.51 | 1.51E-01 | 4.24E-01 | 6.88E-02 |
| A_32_P58215  | -2.09 | -2.18 | -1.20 | -1.15 | -1.24 | 1.91E-02 | 9.44E-04 | 2.22E-01 |
| A_32_P379379 | 1.38  | 1.57  | 1.12  | 1.93  | 1.77  | 1.82E-01 | 2.24E-02 | 2.65E-01 |
| A_24_P257416 | -1.15 | -2.04 | -1.57 | -1.13 | -1.31 | 6.86E-01 | 1.82E-02 | 2.87E-02 |
| A_23_P361940 | -1.77 | -1.39 | -1.26 | -1.22 | -1.95 | 3.56E-02 | 3.75E-01 | 4.84E-01 |
| A_24_P239676 | -2.09 | -1.36 | -1.30 | -1.65 | -2.36 | 4.32E-02 | 5.07E-02 | 1.62E-01 |
| A_23_P126266 | -3.18 | -1.25 | -1.21 | -1.68 | -1.32 | 2.23E-02 | 3.97E-01 | 3.46E-01 |
| A_23_P158976 | 2.49  | 1.85  | 1.18  | 1.32  | 1.23  | 6.76E-03 | 8.12E-03 | 2.35E-01 |
| A_32_P111394 | 1.42  | 2.11  | 1.79  | 1.27  | -1.17 | 2.69E-01 | 9.41E-04 | 3.98E-03 |
| A_24_P219474 | 3.69  | 1.87  | 1.09  | 1.28  | -1.09 | 5.16E-03 | 1.03E-02 | 6.61E-01 |
| A_23_P44569  | 3.17  | 1.69  | 1.17  | 1.23  | 1.09  | 1.22E-03 | 1.20E-02 | 2.18E-01 |
| A_23_P398947 | 1.93  | 1.65  | 1.03  | 1.87  | 1.23  | 2.25E-02 | 2.35E-02 | 8.62E-01 |
| A_24_P238499 | 2.46  | 1.50  | 1.16  | 1.55  | 1.55  | 1.77E-02 | 2.01E-02 | 2.73E-01 |
| A_23_P34644  | -1.71 | -1.99 | 1.14  | -1.36 | -1.87 | 8.60E-03 | 3.06E-03 | 1.28E-01 |
| A_32_P84373  | -1.78 | -1.21 | -1.74 | -1.05 | -2.03 | 6.14E-02 | 5.31E-01 | 6.11E-04 |
| A_23_P54770  | -2.28 | -1.67 | -1.11 | 1.11  | -2.38 | 1.14E-02 | 4.02E-03 | 2.70E-01 |
| A_23_P217277 | 1.68  | 1.81  | -1.01 | 1.29  | 1.97  | 9.00E-02 | 7.49E-03 | 9.37E-01 |
| A_24_P746314 | 1.87  | 2.23  | 1.04  | 1.25  | 1.36  | 1.23E-03 | 1.08E-03 | 7.34E-01 |
| A_24_P71468  | 2.53  | 1.82  | 1.30  | -1.19 | 1.57  | 9.79E-04 | 3.23E-05 | 1.02E-04 |
| A_24_P370472 | -1.93 | -1.81 | -1.01 | -1.23 | -1.82 | 9.06E-03 | 3.64E-03 | 8.90E-01 |
| A_24_P132383 | -1.20 | -1.45 | -1.48 | -1.71 | -1.13 | 3.51E-01 | 6.11E-04 | 4.21E-02 |
| A_23_P427014 | -1.51 | -1.58 | -1.27 | 1.01  | -3.41 | 1.66E-01 | 1.09E-02 | 3.93E-02 |
| A_32_P427222 | -1.64 | -1.32 | -1.57 | -1.17 | -1.73 | 6.52E-03 | 8.74E-02 | 9.84E-02 |
| A_23_P59877  | 1.44  | 1.01  | 1.37  | 1.90  | 1.79  | 1.64E-01 | 9.67E-01 | 1.13E-02 |
| A_32_P121549 | 2.51  | 1.65  | 1.51  | 1.04  | 1.02  | 1.50E-03 | 9.76E-02 | 6.76E-02 |
| A_24_P418998 | -1.13 | 1.67  | 1.14  | 1.35  | 3.74  | 4.71E-01 | 3.93E-02 | 2.99E-01 |

|              |       |       |       |       |       |          |          |          |
|--------------|-------|-------|-------|-------|-------|----------|----------|----------|
| A_24_P852756 | -2.51 | -1.97 | 1.04  | -1.05 | -1.67 | 1.25E-02 | 1.72E-03 | 6.58E-01 |
| A_23_P311901 | 1.63  | 1.04  | 1.27  | 2.11  | 1.46  | 2.95E-02 | 8.53E-01 | 1.32E-01 |
| A_23_P125717 | -1.52 | -1.10 | -1.19 | -1.62 | -2.62 | 9.70E-02 | 3.29E-01 | 3.53E-01 |
| A_24_P114124 | -1.63 | -1.48 | -1.28 | -1.27 | -1.62 | 4.56E-02 | 1.01E-01 | 2.71E-01 |
| A_24_P343233 | -2.05 | -1.82 | -1.05 | -1.29 | -1.51 | 3.94E-03 | 1.82E-03 | 3.70E-01 |
| A_23_P78092  | -1.62 | -2.32 | -1.01 | -1.39 | -1.35 | 2.74E-02 | 9.82E-04 | 9.11E-01 |
| A_32_P741851 | 1.44  | 1.09  | 1.19  | 1.42  | 3.28  | 1.95E-01 | 4.44E-01 | 2.54E-01 |
| A_24_P332647 | 1.64  | 1.30  | 1.56  | 1.51  | 1.42  | 6.40E-02 | 2.44E-01 | 1.35E-02 |
| A_24_P52168  | -2.14 | -1.89 | -1.24 | -1.19 | -1.22 | 1.21E-02 | 5.92E-03 | 1.10E-01 |
| A_23_P396934 | 2.50  | 1.23  | 1.30  | 1.54  | 1.53  | 5.36E-02 | 4.91E-01 | 2.03E-01 |
| A_24_P231546 | 1.27  | 1.30  | 1.05  | 3.22  | 1.32  | 2.28E-02 | 1.54E-02 | 4.72E-01 |
| A_23_P111583 | 1.71  | 1.21  | 1.08  | 1.59  | 2.56  | 9.51E-02 | 1.30E-01 | 6.39E-01 |
| A_23_P402670 | -2.37 | -1.68 | -1.03 | -1.62 | -1.26 | 1.41E-02 | 1.94E-02 | 8.06E-01 |
| A_23_P258151 | -1.24 | -2.09 | -1.07 | -1.25 | -2.19 | 2.97E-01 | 2.13E-03 | 5.72E-01 |
| A_24_P925505 | 1.83  | 1.31  | 1.42  | 1.45  | 1.81  | 9.25E-02 | 1.62E-01 | 2.01E-01 |
| A_23_P166269 | -2.24 | -1.20 | -2.00 | -1.10 | -1.58 | 6.09E-02 | 6.81E-02 | 4.52E-03 |
| A_23_P14853  | 1.94  | 2.67  | 1.29  | 1.24  | -1.25 | 4.78E-03 | 4.93E-04 | 6.30E-02 |
| A_32_P34167  | -1.19 | 1.36  | 1.15  | 1.95  | 2.65  | 5.84E-01 | 3.36E-01 | 4.63E-01 |
| A_23_P74547  | -1.38 | -2.01 | -1.04 | -1.29 | -1.79 | 2.87E-01 | 2.87E-04 | 6.39E-01 |
| A_23_P103765 | -1.92 | -1.53 | 1.00  | -1.59 | -1.63 | 2.01E-02 | 5.08E-03 | 9.50E-01 |
| A_24_P673063 | 1.50  | 1.04  | 1.39  | 1.94  | 1.51  | 1.13E-01 | 8.00E-01 | 3.13E-03 |
| A_24_P243528 | -1.63 | -1.76 | 1.05  | -1.61 | -1.61 | 8.15E-03 | 1.70E-02 | 5.77E-01 |
| A_32_P114914 | 1.37  | 1.49  | -1.08 | 1.36  | 2.74  | 8.66E-02 | 7.63E-03 | 5.57E-01 |
| A_23_P145336 | -2.03 | -1.78 | 1.03  | -1.42 | -1.43 | 1.01E-02 | 5.30E-03 | 7.60E-01 |
| A_23_P73097  | 1.79  | 1.02  | 1.16  | 1.74  | 2.25  | 1.19E-01 | 9.09E-01 | 3.62E-01 |
| A_24_P576191 | -1.32 | -2.21 | -1.10 | -1.67 | -1.07 | 1.88E-01 | 9.74E-03 | 6.70E-01 |
| A_23_P4400   | 1.22  | 1.34  | 1.89  | 1.20  | 1.77  | 5.36E-01 | 1.45E-01 | 2.16E-02 |
| A_32_P204676 | 1.53  | 1.06  | 1.49  | 1.82  | 1.42  | 9.54E-02 | 7.07E-01 | 1.34E-03 |
| A_24_P871940 | 1.64  | 1.95  | 1.59  | 1.32  | -1.15 | 1.78E-02 | 3.10E-02 | 3.03E-02 |
| A_24_P927756 | -1.36 | -1.35 | -1.25 | -1.24 | -3.41 | 1.47E-01 | 1.57E-01 | 5.31E-02 |
| A_23_P343398 | -2.12 | -1.70 | -1.43 | 1.44  | -1.45 | 1.23E-02 | 7.13E-02 | 1.02E-01 |
| A_24_P152845 | 1.38  | 1.15  | 1.04  | 2.24  | 1.88  | 4.76E-01 | 5.73E-01 | 8.61E-01 |
| A_23_P90626  | -1.95 | -1.57 | -1.09 | -1.33 | -1.69 | 1.67E-02 | 4.88E-03 | 4.16E-01 |
| A_32_P106615 | -1.43 | -2.82 | -1.02 | -1.56 | 1.25  | 1.26E-01 | 9.39E-04 | 8.99E-01 |
| A_23_P67339  | -1.49 | -1.60 | -1.12 | -1.54 | -1.69 | 2.92E-02 | 8.42E-03 | 9.33E-02 |
| A_23_P90470  | 1.43  | 1.14  | 1.24  | 1.45  | 2.35  | 1.69E-01 | 6.13E-01 | 1.68E-01 |
| A_32_P212471 | 3.21  | 1.40  | 1.37  | 1.20  | -1.10 | 9.83E-04 | 9.70E-02 | 1.47E-02 |
| A_24_P935986 | -1.39 | -2.28 | -1.20 | -1.35 | -1.18 | 1.73E-01 | 6.24E-04 | 1.06E-01 |
| A_32_P14762  | -1.47 | -1.73 | -1.23 | -1.04 | -1.42 | 2.76E-01 | 6.02E-02 | 5.28E-01 |
| A_23_P252175 | 1.07  | 1.14  | 1.23  | 2.00  | 2.85  | 6.95E-01 | 4.38E-01 | 2.83E-01 |
| A_23_P12549  | -1.43 | -2.15 | -1.13 | -1.30 | -1.31 | 4.81E-02 | 2.86E-03 | 3.90E-01 |
| A_24_P84340  | 1.52  | 1.10  | 1.57  | 1.66  | 1.71  | 5.71E-02 | 3.78E-01 | 2.21E-02 |
| A_32_P158181 | -1.83 | -2.07 | -1.32 | -1.34 | 1.22  | 3.48E-02 | 1.90E-03 | 9.75E-02 |
| A_23_P42784  | -1.88 | -1.01 | -1.72 | -1.47 | 1.13  | 2.73E-02 | 9.81E-01 | 3.29E-02 |
| A_23_P215913 | -1.33 | -1.21 | -1.02 | -2.18 | -1.71 | 2.16E-01 | 1.28E-01 | 8.46E-01 |
| A_23_P404785 | 1.97  | 1.15  | 1.47  | 1.15  | 1.76  | 1.26E-03 | 1.01E-01 | 3.33E-04 |
| A_23_P77908  | 2.59  | 1.22  | 1.96  | 1.03  | -1.09 | 4.24E-03 | 9.23E-02 | 4.94E-04 |

|              |       |       |       |       |       |          |          |          |
|--------------|-------|-------|-------|-------|-------|----------|----------|----------|
| A_32_P212886 | 2.14  | -1.06 | 1.45  | 1.68  | 1.46  | 2.81E-02 | 7.41E-01 | 8.40E-03 |
| A_23_P102731 | 1.55  | 1.24  | 1.13  | 1.56  | 2.09  | 1.17E-01 | 5.95E-02 | 1.65E-01 |
| A_23_P217326 | 1.07  | -1.14 | -1.39 | -1.99 | -2.30 | 6.22E-01 | 7.78E-02 | 1.59E-02 |
| A_24_P288836 | -1.98 | -1.72 | -1.08 | -1.23 | -1.59 | 2.41E-02 | 3.28E-03 | 2.27E-01 |
| A_23_P259901 | 1.08  | 1.28  | 1.82  | 1.86  | 1.27  | 7.59E-01 | 5.82E-02 | 2.14E-03 |
| A_24_P270424 | -1.61 | -1.55 | -2.34 | 1.27  | -1.32 | 2.44E-02 | 7.87E-02 | 4.11E-04 |
| A_32_P29083  | -1.33 | -1.20 | -2.20 | 1.07  | -2.07 | 2.21E-01 | 1.64E-01 | 2.66E-04 |
| A_23_P39790  | -2.48 | -1.72 | 1.00  | -1.16 | -1.61 | 2.40E-02 | 1.06E-02 | 9.92E-01 |
| A_24_P642758 | -1.04 | 1.43  | 1.21  | 1.55  | 2.87  | 7.57E-01 | 1.13E-01 | 2.68E-01 |
| A_23_P70095  | -1.95 | -1.82 | -1.06 | -1.36 | -1.26 | 8.03E-03 | 2.69E-02 | 4.66E-01 |
| A_23_P166087 | -1.67 | -1.79 | -1.07 | -1.42 | -1.40 | 2.06E-02 | 2.20E-03 | 3.83E-01 |
| A_23_P160286 | -1.37 | 1.00  | -1.56 | -2.19 | -1.40 | 3.55E-01 | 9.92E-01 | 3.32E-02 |
| A_23_P104493 | -1.62 | -2.17 | -1.45 | 1.04  | -1.37 | 1.14E-01 | 1.39E-02 | 3.14E-03 |
| A_24_P216654 | 1.33  | 1.30  | 2.55  | -1.59 | 1.61  | 4.08E-01 | 1.34E-01 | 8.89E-03 |
| A_24_P935330 | -1.81 | -1.92 | -1.26 | -1.12 | -1.25 | 2.84E-02 | 2.85E-03 | 3.95E-02 |
| A_23_P35444  | 1.27  | 1.00  | 2.11  | 1.88  | 1.10  | 4.40E-01 | 9.76E-01 | 3.45E-04 |
| A_24_P919283 | 1.16  | 2.09  | 1.03  | 1.73  | 1.48  | 1.64E-01 | 2.52E-03 | 6.12E-01 |
| A_32_P49552  | -1.65 | -1.08 | -1.51 | -1.11 | -2.87 | 1.40E-01 | 7.18E-01 | 1.03E-01 |
| A_23_P135164 | 1.05  | 1.64  | 2.02  | 1.06  | 1.52  | 7.48E-01 | 2.90E-03 | 1.19E-04 |
| A_23_P3681   | 1.15  | 1.01  | 2.06  | 1.63  | 1.47  | 6.45E-01 | 8.79E-01 | 4.10E-04 |
| A_24_P822692 | -1.28 | -1.49 | -1.39 | -1.20 | -2.07 | 5.84E-01 | 3.85E-02 | 3.17E-02 |
| A_24_P91991  | 2.20  | 1.60  | 1.15  | 1.65  | -1.01 | 2.53E-02 | 1.58E-01 | 5.00E-01 |
| A_24_P206343 | -1.99 | -1.51 | -1.12 | 1.04  | -1.90 | 3.93E-02 | 6.86E-03 | 6.30E-01 |
| A_23_P351667 | 2.13  | 1.46  | 1.20  | 2.35  | -1.28 | 4.15E-02 | 2.35E-02 | 1.78E-01 |
| A_23_P159986 | 1.25  | 1.47  | 1.47  | 1.76  | 1.39  | 1.61E-01 | 3.08E-02 | 9.83E-02 |
| A_24_P92267  | 2.29  | -1.05 | 1.11  | 1.46  | 2.12  | 5.37E-02 | 8.51E-01 | 6.74E-01 |
| A_24_P365526 | -1.83 | -1.46 | 1.00  | -1.30 | -1.72 | 1.58E-03 | 2.06E-04 | 9.95E-01 |
| A_23_P10506  | -2.73 | -1.43 | -1.13 | -1.36 | -1.20 | 2.89E-03 | 1.18E-03 | 1.23E-01 |
| A_32_P163858 | 1.69  | 1.75  | 1.10  | 1.15  | 1.60  | 1.19E-02 | 2.67E-02 | 5.09E-01 |
| A_23_P29953  | -1.38 | -1.51 | -1.18 | -1.40 | -1.07 | 2.44E-01 | 5.22E-03 | 4.12E-01 |
| A_24_P354800 | -1.66 | -1.86 | -1.01 | -1.36 | -1.38 | 1.43E-02 | 1.91E-03 | 8.79E-01 |
| A_23_P85800  | -1.82 | -1.71 | -1.12 | 1.02  | -1.75 | 3.25E-02 | 5.06E-03 | 2.45E-01 |
| A_23_P311346 | 2.08  | -1.06 | 1.03  | 1.54  | 1.90  | 4.46E-02 | 7.85E-01 | 9.00E-01 |
| A_23_P380754 | 2.08  | 1.37  | -1.14 | 1.43  | 1.95  | 4.40E-02 | 2.57E-01 | 5.39E-01 |
| A_23_P39871  | 1.68  | -1.00 | 1.15  | 1.40  | 2.57  | 9.81E-02 | 9.93E-01 | 2.96E-01 |
| A_23_P42306  | -1.91 | -1.67 | -1.02 | -1.10 | -1.62 | 1.60E-04 | 4.41E-03 | 7.44E-01 |
| A_23_P21907  | -2.42 | -1.52 | -1.19 | -1.33 | -1.08 | 5.13E-03 | 7.35E-04 | 1.39E-01 |
| A_23_P144980 | -1.64 | -1.45 | -1.14 | -1.72 | -1.53 | 5.63E-02 | 1.46E-01 | 3.48E-01 |
| A_23_P302654 | 2.17  | 1.37  | 1.37  | -1.07 | 1.64  | 2.75E-03 | 3.05E-02 | 1.04E-02 |
| A_24_P40626  | -1.71 | -1.10 | -1.63 | -1.71 | 1.25  | 2.41E-02 | 6.48E-01 | 3.38E-02 |
| A_23_P352950 | 1.58  | 1.46  | 1.21  | 1.71  | 1.18  | 4.80E-03 | 2.56E-03 | 2.24E-02 |
| A_23_P24260  | -1.32 | -1.67 | 1.11  | -1.63 | -1.75 | 2.36E-01 | 5.02E-03 | 4.41E-01 |
| A_32_P34920  | -1.31 | -1.44 | -1.53 | -1.34 | -1.29 | 3.50E-01 | 3.66E-02 | 3.24E-02 |
| A_23_P377957 | -1.58 | -1.28 | 1.00  | -1.55 | -1.73 | 3.99E-03 | 9.27E-02 | 9.78E-01 |
| A_23_P30913  | -1.75 | -1.91 | 1.09  | -1.23 | -1.50 | 8.38E-04 | 3.90E-03 | 1.08E-01 |
| A_32_P223173 | 1.99  | -1.02 | 1.05  | 1.73  | 1.55  | 2.72E-02 | 9.47E-01 | 7.16E-01 |
| A_23_P45099  | -2.04 | -1.91 | 1.01  | -1.21 | -1.27 | 6.04E-03 | 9.74E-03 | 9.06E-01 |

|              |       |       |       |       |       |          |          |          |
|--------------|-------|-------|-------|-------|-------|----------|----------|----------|
| A_23_P26976  | -2.15 | -1.63 | -1.13 | -1.10 | -1.39 | 5.01E-03 | 1.22E-03 | 2.46E-01 |
| A_23_P110791 | -2.45 | -1.47 | 1.00  | -1.16 | -1.53 | 3.32E-03 | 2.67E-03 | 9.94E-01 |
| A_23_P112798 | -1.32 | -1.17 | -1.17 | -1.80 | -1.81 | 1.14E-01 | 5.10E-02 | 1.54E-01 |
| A_23_P502706 | 1.59  | 2.47  | -1.17 | 1.16  | 1.23  | 1.21E-02 | 3.48E-03 | 5.45E-01 |
| A_32_P107876 | 1.04  | 1.23  | 1.42  | 2.21  | 1.37  | 6.70E-01 | 5.50E-02 | 2.34E-04 |
| A_24_P303480 | 2.50  | 1.58  | 1.18  | 1.02  | 1.27  | 1.56E-03 | 6.28E-03 | 3.12E-02 |
| A_24_P666035 | -1.44 | -1.30 | -1.19 | -1.24 | -2.22 | 3.66E-02 | 1.44E-01 | 1.90E-02 |
| A_23_P3014   | -1.75 | -1.77 | -1.17 | -1.22 | -1.21 | 3.39E-02 | 9.03E-03 | 2.96E-01 |
| A_24_P381499 | -1.36 | -1.47 | -1.08 | -1.70 | -1.61 | 1.40E-01 | 1.47E-01 | 5.90E-01 |
| A_24_P350786 | 1.51  | 1.20  | 1.11  | 1.38  | 2.07  | 1.30E-01 | 4.34E-01 | 5.45E-01 |
| A_32_P181443 | -1.84 | -1.32 | -1.16 | -1.14 | -2.12 | 1.42E-01 | 2.23E-01 | 3.70E-01 |
| A_23_P131834 | 1.20  | 1.48  | -1.04 | 1.62  | 2.30  | 4.34E-01 | 5.39E-02 | 8.74E-01 |
| A_23_P27994  | -1.87 | -1.64 | -1.12 | -1.02 | -1.60 | 1.08E-02 | 4.05E-03 | 1.42E-01 |
| A_32_P87697  | -1.76 | -2.00 | 1.01  | -1.23 | -1.39 | 2.05E-02 | 8.02E-03 | 8.91E-01 |
| A_23_P127727 | -1.49 | -1.40 | -1.56 | -1.05 | -1.39 | 5.94E-02 | 1.56E-01 | 1.25E-02 |
| A_24_P170454 | 1.82  | 1.15  | 1.06  | 1.62  | 1.57  | 8.83E-03 | 3.62E-01 | 3.67E-01 |
| A_23_P160881 | -1.79 | -1.98 | -1.10 | -1.12 | -1.23 | 4.22E-02 | 1.21E-02 | 6.01E-01 |
| A_32_P214665 | 1.16  | 1.23  | 2.32  | 1.27  | 1.21  | 5.15E-01 | 2.96E-01 | 9.44E-04 |
| A_23_P53137  | -1.28 | -1.56 | -2.31 | -1.03 | -1.64 | 5.83E-01 | 3.79E-01 | 3.63E-02 |
| A_23_P217704 | 1.68  | 1.71  | 1.08  | 1.03  | 1.38  | 6.15E-02 | 1.27E-02 | 7.72E-01 |
| A_23_P42975  | -1.14 | -1.81 | -1.06 | -1.45 | -1.83 | 6.24E-01 | 5.27E-02 | 7.55E-01 |
| A_23_P17955  | 1.38  | 1.21  | 1.62  | -1.10 | 2.38  | 3.98E-02 | 5.17E-01 | 1.12E-02 |
| A_24_P75994  | -1.20 | -1.54 | -1.08 | 1.05  | -3.05 | 4.13E-01 | 1.25E-03 | 6.29E-01 |
| A_23_P151895 | -1.24 | -1.32 | -1.31 | -1.88 | -1.09 | 3.58E-01 | 3.16E-01 | 5.42E-02 |
| A_24_P175707 | 1.39  | 1.24  | 1.46  | 1.30  | 1.76  | 2.58E-01 | 2.99E-01 | 1.58E-02 |
| A_23_P254212 | 1.09  | 1.63  | -1.13 | 1.89  | 1.08  | 7.79E-01 | 8.16E-03 | 7.01E-01 |
| A_23_P324706 | -1.59 | -1.13 | -1.64 | -1.05 | -1.87 | 1.06E-01 | 4.85E-01 | 1.44E-04 |
| A_23_P164057 | -1.41 | -1.12 | -1.08 | -1.94 | -1.45 | 2.53E-01 | 7.09E-01 | 5.19E-01 |
| A_23_P161352 | 2.40  | 1.82  | 1.22  | -1.06 | 1.10  | 2.68E-03 | 4.17E-04 | 4.41E-02 |
| A_23_P58557  | -1.02 | -1.57 | -1.30 | -1.73 | -1.06 | 9.55E-01 | 1.17E-01 | 3.00E-01 |
| A_24_P339126 | 1.71  | 1.10  | 1.22  | 2.76  | -1.00 | 1.52E-01 | 6.41E-01 | 3.79E-01 |
| A_32_P220463 | 1.77  | 1.79  | 1.84  | 1.17  | -1.73 | 5.91E-03 | 1.87E-02 | 4.81E-03 |
| A_23_P21495  | -2.86 | -1.85 | 1.02  | -1.03 | -1.38 | 8.93E-03 | 1.17E-02 | 8.03E-01 |
| A_24_P879740 | -1.76 | -1.56 | -1.03 | -1.51 | -1.30 | 3.70E-02 | 1.45E-02 | 7.88E-01 |
| A_24_P380628 | -1.14 | -1.36 | -1.19 | -1.58 | -1.73 | 3.31E-01 | 7.18E-03 | 1.04E-01 |
| A_24_P16337  | -1.39 | -1.11 | -1.75 | -1.25 | -1.60 | 4.45E-01 | 6.98E-01 | 3.88E-02 |
| A_23_P117851 | 1.72  | -1.25 | 1.27  | 1.34  | 2.18  | 1.16E-01 | 4.49E-01 | 1.84E-01 |
| A_23_P388168 | -1.30 | -1.44 | -1.33 | -1.60 | 1.01  | 3.57E-01 | 1.77E-02 | 8.35E-02 |
| A_23_P416468 | 1.81  | -1.23 | 1.27  | 1.56  | 1.42  | 1.48E-01 | 6.16E-01 | 1.93E-01 |
| A_23_P202361 | 1.44  | 1.14  | 1.20  | 1.61  | 1.63  | 1.29E-01 | 2.79E-01 | 3.70E-01 |
| A_24_P33895  | -1.36 | -1.73 | -1.02 | 1.08  | -2.65 | 6.15E-02 | 4.11E-03 | 8.76E-01 |
| A_24_P546043 | 1.21  | -1.11 | 1.30  | 1.82  | 1.78  | 5.46E-01 | 6.41E-01 | 7.25E-02 |
| A_24_P345866 | 1.30  | 1.06  | 1.46  | 1.49  | 1.47  | 3.39E-01 | 7.72E-01 | 4.07E-02 |
| A_24_P63290  | 1.42  | -1.10 | 1.37  | 1.71  | 1.76  | 3.65E-02 | 5.14E-01 | 1.35E-01 |
| A_24_P845223 | -2.06 | -1.74 | -1.09 | -1.28 | 1.17  | 2.14E-02 | 1.89E-03 | 2.46E-01 |
| A_23_P103617 | 1.68  | -1.13 | 1.13  | 1.79  | 1.78  | 1.16E-01 | 5.30E-01 | 3.59E-01 |
| A_23_P210158 | 2.15  | 1.18  | -1.12 | 2.00  | 1.20  | 1.05E-02 | 1.32E-01 | 4.29E-01 |

|              |       |       |       |       |       |          |          |          |
|--------------|-------|-------|-------|-------|-------|----------|----------|----------|
| A_23_P46356  | -1.62 | -2.15 | -1.24 | 1.05  | -1.17 | 4.37E-02 | 5.59E-04 | 5.04E-02 |
| A_32_P188193 | -1.01 | 1.18  | 1.03  | 1.91  | 2.53  | 9.15E-01 | 3.09E-01 | 8.18E-01 |
| A_23_P257542 | -1.88 | -1.38 | -1.36 | -1.03 | -1.45 | 4.83E-02 | 9.53E-03 | 1.18E-01 |
| A_23_P119634 | 1.25  | 1.06  | 1.34  | 2.46  | 1.42  | 4.71E-01 | 4.40E-01 | 1.47E-01 |
| A_23_P143334 | -1.64 | -1.58 | -1.24 | -1.16 | -1.44 | 2.13E-02 | 1.27E-02 | 4.88E-02 |
| A_24_P50245  | -1.78 | -1.68 | 1.07  | -1.20 | -1.54 | 1.47E-03 | 1.02E-02 | 4.19E-01 |
| A_24_P930796 | -1.65 | -1.35 | -1.26 | -1.50 | -1.07 | 9.59E-02 | 3.14E-02 | 2.79E-01 |
| A_23_P105144 | 1.18  | 1.54  | 1.21  | 1.51  | 1.43  | 2.13E-01 | 1.23E-03 | 5.60E-02 |
| A_23_P106629 | -1.48 | -1.54 | -1.42 | -1.37 | -1.06 | 1.29E-01 | 2.69E-02 | 8.14E-02 |
| A_24_P924752 | 2.06  | -1.11 | -1.01 | 1.42  | 1.82  | 3.58E-02 | 7.62E-01 | 9.58E-01 |
| A_23_P118122 | 1.31  | 1.27  | 1.11  | 1.79  | 1.92  | 1.61E-01 | 9.85E-02 | 3.61E-01 |
| A_24_P85243  | -1.51 | -1.36 | -1.29 | -1.02 | -2.44 | 2.45E-02 | 1.61E-02 | 1.52E-01 |
| A_32_P31832  | 1.15  | 1.63  | 1.22  | 1.33  | 1.48  | 4.29E-01 | 4.00E-03 | 9.14E-02 |
| A_23_P109488 | -1.31 | -1.18 | -1.21 | -1.20 | -2.59 | 8.81E-02 | 1.71E-01 | 6.71E-02 |
| A_23_P51136  | -1.21 | -1.56 | -1.12 | -1.11 | -2.38 | 5.40E-02 | 3.04E-04 | 2.90E-01 |
| A_23_P86283  | -1.61 | -1.55 | 1.03  | -1.35 | -1.62 | 2.75E-02 | 5.59E-02 | 6.70E-01 |
| A_24_P367454 | 1.54  | 1.57  | 1.11  | 1.32  | -1.05 | 2.49E-02 | 3.48E-02 | 5.82E-01 |
| A_23_P202013 | -1.32 | -1.24 | -1.16 | -2.19 | -1.11 | 4.45E-01 | 2.66E-01 | 2.83E-01 |
| A_32_P231415 | 1.27  | 1.88  | 1.17  | 1.13  | 1.49  | 4.12E-01 | 1.19E-02 | 3.33E-01 |
| A_23_P148584 | 1.07  | -1.38 | -1.31 | -1.88 | -1.31 | 8.05E-01 | 2.44E-01 | 3.68E-01 |
| A_23_P159335 | -1.42 | -1.44 | -1.28 | 1.14  | -2.02 | 5.68E-03 | 4.93E-02 | 4.38E-02 |
| A_23_P401700 | -1.25 | -1.98 | -1.17 | -1.17 | -1.26 | 2.14E-01 | 1.56E-05 | 3.27E-01 |
| A_23_P208182 | -1.45 | -1.78 | 1.00  | -1.37 | -1.38 | 7.85E-02 | 6.49E-03 | 9.93E-01 |
| A_23_P96556  | 1.70  | 1.03  | 1.86  | 1.27  | 1.26  | 2.81E-02 | 7.87E-01 | 2.00E-03 |
| A_32_P187320 | 1.39  | 1.10  | 1.31  | 1.38  | 2.10  | 2.12E-01 | 7.80E-01 | 7.06E-02 |
| A_23_P329271 | 1.63  | 1.82  | 1.15  | 1.19  | 1.16  | 1.83E-03 | 1.12E-03 | 7.99E-02 |
| A_23_P151805 | -1.39 | -1.13 | -1.24 | -1.65 | -1.50 | 1.95E-01 | 3.73E-01 | 2.33E-02 |
| A_24_P232158 | -1.30 | -1.11 | -1.47 | -1.42 | -1.61 | 1.52E-01 | 4.91E-01 | 1.01E-02 |
| A_23_P501232 | 2.16  | 1.36  | 1.32  | 1.16  | 1.05  | 8.52E-05 | 2.77E-02 | 3.87E-04 |
| A_23_P416711 | 2.51  | 1.77  | 1.12  | 1.11  | 1.04  | 4.97E-03 | 1.02E-01 | 4.03E-01 |
| A_24_P322474 | -1.64 | -1.58 | -1.09 | -1.10 | -1.61 | 1.89E-03 | 1.01E-03 | 2.14E-01 |
| A_23_P22013  | -1.63 | -1.11 | -1.34 | -1.40 | -1.37 | 6.03E-02 | 5.98E-01 | 1.30E-01 |
| A_23_P113777 | -1.63 | 1.03  | -1.28 | -1.73 | -1.17 | 7.96E-02 | 8.97E-01 | 9.37E-02 |
| A_32_P113322 | -1.69 | -1.21 | -1.23 | -1.38 | -1.71 | 5.74E-02 | 2.21E-01 | 1.85E-01 |
| A_32_P159176 | 1.01  | 1.49  | -1.05 | 1.59  | 2.12  | 9.04E-01 | 4.72E-03 | 4.87E-01 |
| A_23_P372946 | 1.41  | 1.58  | -1.06 | 1.43  | 1.62  | 1.19E-01 | 2.42E-02 | 7.34E-01 |
| A_23_P1682   | 1.11  | 1.40  | 1.04  | 1.85  | 1.57  | 6.28E-01 | 6.22E-02 | 6.44E-01 |
| A_24_P307395 | -1.26 | -1.25 | -1.11 | -2.29 | -1.30 | 5.98E-01 | 6.42E-02 | 6.53E-01 |
| A_23_P400041 | -1.06 | 1.82  | 1.29  | 1.31  | 2.23  | 6.09E-01 | 8.38E-02 | 1.60E-01 |
| A_23_P348524 | 1.61  | 1.20  | -1.23 | 1.61  | 1.98  | 5.65E-02 | 1.67E-01 | 2.15E-01 |
| A_23_P360209 | -1.35 | -1.70 | -1.05 | -1.25 | -1.67 | 1.66E-01 | 3.89E-03 | 5.53E-01 |
| A_23_P67042  | 1.33  | 1.12  | 1.18  | 1.82  | 1.45  | 1.25E-01 | 2.76E-01 | 1.86E-01 |
| A_23_P60146  | -1.60 | -1.42 | -1.24 | -1.84 | 1.03  | 1.60E-01 | 1.33E-01 | 1.16E-01 |
| A_23_P200138 | -2.22 | -1.50 | -1.18 | 1.07  | -1.47 | 1.01E-02 | 5.59E-03 | 1.11E-01 |
| A_24_P29733  | -1.39 | -1.81 | 1.03  | -1.58 | -1.20 | 4.64E-02 | 1.93E-02 | 8.41E-01 |
| A_32_P139367 | -1.02 | -1.89 | -1.21 | -1.07 | -2.04 | 9.53E-01 | 3.24E-02 | 3.38E-01 |
| A_23_P421423 | -1.79 | -1.90 | -1.14 | -1.01 | -1.17 | 8.35E-03 | 1.31E-03 | 1.41E-01 |

|              |       |       |       |       |       |          |          |          |
|--------------|-------|-------|-------|-------|-------|----------|----------|----------|
| A_24_P119665 | -1.38 | -1.56 | -1.18 | -1.13 | -1.84 | 1.84E-01 | 4.71E-02 | 2.26E-01 |
| A_23_P121665 | 1.60  | 1.00  | 1.09  | 1.45  | 2.14  | 1.16E-01 | 9.94E-01 | 7.43E-01 |
| A_24_P348006 | -1.24 | -1.45 | 1.04  | -1.69 | -1.52 | 3.91E-01 | 1.53E-02 | 8.11E-01 |
| A_32_P220591 | 1.33  | 1.43  | 1.46  | 1.31  | 1.20  | 3.48E-01 | 1.62E-01 | 2.53E-01 |
| A_24_P59387  | -1.03 | 1.30  | 1.12  | 1.99  | 1.75  | 7.70E-01 | 9.97E-03 | 3.78E-01 |
| A_24_P153568 | -1.48 | -1.89 | -1.16 | -1.30 | -1.07 | 4.84E-02 | 5.16E-03 | 1.91E-01 |
| A_23_P303286 | 1.01  | -1.26 | -1.92 | -1.13 | -1.67 | 9.76E-01 | 3.51E-01 | 7.72E-03 |
| A_23_P66095  | 1.63  | 1.58  | 1.38  | 1.13  | -1.30 | 2.32E-02 | 9.93E-04 | 2.25E-01 |
| A_24_P253100 | -1.16 | -1.43 | -1.60 | -1.24 | -1.37 | 5.71E-01 | 5.54E-02 | 4.24E-03 |
| A_23_P158318 | -1.30 | -1.09 | -1.44 | -1.98 | -1.14 | 1.09E-01 | 3.39E-01 | 1.42E-03 |
| A_23_P140748 | 1.07  | 1.19  | 1.96  | 1.38  | 1.35  | 4.23E-01 | 6.52E-02 | 4.91E-06 |
| A_24_P326084 | -2.06 | -1.57 | -1.13 | -1.15 | -3.17 | 1.62E-01 | 3.97E-03 | 4.47E-01 |
| A_32_P203749 | 1.29  | 1.65  | 1.10  | -1.12 | 2.32  | 7.22E-02 | 1.84E-03 | 2.64E-01 |
| A_23_P101908 | 1.41  | 1.14  | 1.69  | 1.37  | 1.25  | 3.53E-02 | 4.99E-01 | 1.63E-02 |
| A_24_P390668 | -1.64 | -1.64 | -1.00 | -1.09 | -1.61 | 1.87E-02 | 5.61E-03 | 9.68E-01 |
| A_24_P637651 | -2.06 | -1.72 | -1.04 | 1.01  | -1.29 | 7.47E-03 | 2.21E-04 | 6.10E-01 |
| A_24_P51115  | -1.87 | -1.63 | -1.35 | -1.04 | -1.21 | 5.67E-02 | 3.71E-02 | 1.54E-01 |
| A_32_P42253  | -1.08 | 1.32  | 1.18  | 1.24  | 2.98  | 6.69E-01 | 4.86E-02 | 1.20E-01 |
| A_23_P169460 | 1.66  | 1.05  | 1.47  | 1.41  | 1.74  | 1.21E-01 | 7.42E-01 | 2.95E-02 |
| A_23_P408323 | 1.12  | 1.42  | 1.25  | 1.20  | 2.31  | 6.34E-01 | 2.51E-02 | 2.40E-01 |
| A_23_P141394 | 1.47  | 1.53  | 1.11  | 1.05  | 2.16  | 1.51E-02 | 6.64E-03 | 9.81E-02 |
| A_23_P119202 | -1.79 | -1.93 | -1.19 | -1.29 | 1.15  | 1.01E-01 | 3.47E-02 | 3.13E-01 |
| A_24_P328504 | -1.99 | -1.72 | -1.18 | 1.04  | -1.20 | 7.67E-03 | 6.36E-03 | 8.75E-02 |
| A_24_P320727 | -1.12 | -1.48 | -1.06 | -1.40 | -1.84 | 7.33E-01 | 3.40E-01 | 8.09E-01 |
| A_32_P88555  | 1.25  | 1.29  | 1.32  | 1.74  | 1.15  | 1.81E-01 | 3.15E-01 | 4.83E-02 |
| A_23_P366726 | 1.23  | -1.06 | 1.50  | 1.65  | 1.85  | 2.43E-01 | 6.26E-01 | 2.61E-02 |
| A_24_P229884 | -1.41 | -1.25 | -1.38 | 1.27  | -2.40 | 6.83E-02 | 1.14E-01 | 7.58E-02 |
| A_23_P55682  | -1.14 | -1.27 | -1.49 | -1.47 | -1.25 | 3.66E-01 | 3.05E-02 | 1.03E-04 |
| A_24_P548966 | -1.48 | -1.24 | -1.08 | -2.01 | -1.24 | 1.90E-01 | 3.46E-02 | 4.84E-01 |
| A_23_P370782 | 1.95  | 1.64  | 1.19  | 1.06  | -1.13 | 2.91E-03 | 3.67E-03 | 1.73E-01 |
| A_23_P131846 | -1.10 | -1.66 | -1.06 | -1.26 | -1.57 | 6.54E-01 | 1.00E-02 | 8.17E-01 |
| A_23_P83579  | 1.71  | 1.71  | 1.07  | 1.13  | 1.22  | 5.40E-04 | 6.48E-04 | 2.28E-01 |
| A_23_P150343 | -1.50 | -1.78 | -1.34 | -1.06 | -1.50 | 3.53E-01 | 8.38E-02 | 2.47E-01 |
| A_23_P64828  | 1.54  | 1.13  | 1.38  | 1.35  | 1.42  | 8.11E-02 | 5.50E-01 | 1.07E-01 |
| A_23_P66694  | -2.10 | -1.81 | -1.11 | 1.01  | -1.16 | 1.53E-02 | 2.43E-02 | 3.88E-01 |
| A_24_P671875 | -1.19 | -2.01 | -1.33 | -1.14 | -1.27 | 5.05E-01 | 1.54E-02 | 1.13E-01 |
| A_23_P150379 | 1.16  | 1.29  | 1.20  | 1.53  | 2.00  | 4.65E-01 | 2.67E-01 | 9.32E-02 |
| A_23_P71570  | -1.50 | -1.07 | -1.30 | -1.51 | -1.17 | 7.95E-02 | 7.85E-01 | 3.25E-02 |
| A_32_P377880 | 1.59  | 1.04  | 1.86  | -1.03 | 1.36  | 5.63E-02 | 8.96E-01 | 6.39E-03 |
| A_23_P204847 | -1.58 | -1.69 | -1.10 | -1.09 | -1.36 | 2.65E-02 | 2.42E-04 | 8.33E-02 |
| A_32_P156851 | -1.23 | -1.02 | -1.41 | -1.39 | -1.93 | 4.42E-01 | 9.22E-01 | 1.97E-03 |
| A_23_P209678 | -1.74 | -1.85 | 1.06  | -1.05 | -1.36 | 8.90E-02 | 2.60E-02 | 7.89E-01 |
| A_23_P115998 | -1.60 | -1.65 | -1.34 | 1.13  | -1.26 | 1.78E-01 | 8.00E-03 | 9.30E-02 |
| A_23_P84910  | -1.54 | -1.37 | -1.21 | -1.21 | -1.65 | 1.07E-01 | 1.06E-01 | 2.10E-01 |
| A_24_P166527 | -1.50 | -1.48 | -1.57 | 1.15  | -1.57 | 1.80E-01 | 1.74E-02 | 2.76E-02 |
| A_23_P206585 | -1.82 | -1.42 | -1.27 | -1.05 | -1.37 | 3.58E-03 | 1.27E-02 | 1.33E-04 |
| A_23_P116195 | -1.43 | -1.38 | -1.21 | -1.26 | -1.41 | 2.72E-01 | 1.08E-02 | 3.24E-01 |

|              |       |       |       |       |       |          |          |          |
|--------------|-------|-------|-------|-------|-------|----------|----------|----------|
| A_23_P42695  | 1.64  | 1.27  | 1.32  | 1.26  | 2.09  | 1.24E-01 | 5.61E-02 | 7.53E-04 |
| A_23_P306987 | 1.18  | 1.17  | 1.82  | 1.15  | 1.37  | 3.95E-01 | 2.94E-01 | 8.08E-05 |
| A_24_P416489 | -1.20 | -1.92 | -1.44 | -1.07 | -1.63 | 4.94E-01 | 1.40E-01 | 8.12E-02 |
| A_23_P201587 | 1.86  | 1.18  | -1.00 | 1.31  | 1.99  | 1.29E-02 | 1.09E-01 | 9.70E-01 |
| A_24_P551842 | -1.45 | -2.06 | -1.05 | -1.29 | -1.08 | 1.39E-02 | 1.35E-04 | 4.25E-01 |
| A_24_P203315 | -1.15 | 1.24  | 1.12  | 1.57  | 2.70  | 6.22E-01 | 8.20E-02 | 3.33E-01 |
| A_23_P43476  | 1.57  | 1.32  | 1.01  | 1.53  | 1.53  | 2.73E-02 | 7.57E-02 | 9.34E-01 |
| A_23_P116114 | 1.57  | 1.17  | 1.09  | 1.24  | 1.54  | 4.60E-02 | 6.05E-01 | 7.62E-01 |
| A_32_P351968 | -2.08 | -1.52 | 1.04  | -1.10 | -1.49 | 5.33E-03 | 1.23E-02 | 4.39E-01 |
| A_24_P128442 | -1.06 | -1.34 | -1.17 | -1.56 | -1.41 | 8.09E-01 | 2.22E-01 | 1.72E-01 |
| A_23_P22660  | -1.59 | -1.15 | -1.83 | -1.09 | -1.20 | 1.44E-02 | 6.86E-02 | 4.71E-05 |
| A_32_P489662 | 1.57  | -1.04 | 1.91  | 1.63  | 1.43  | 4.46E-01 | 8.45E-01 | 4.20E-02 |
| A_23_P405815 | -1.57 | -1.13 | -1.22 | -1.87 | -1.14 | 2.87E-02 | 4.36E-01 | 2.89E-01 |
| A_24_P114142 | -1.38 | -1.18 | -1.47 | -1.34 | -1.35 | 1.15E-01 | 4.00E-01 | 4.15E-02 |
| A_32_P154053 | 1.27  | 1.35  | 1.41  | 1.25  | 1.38  | 2.10E-01 | 8.89E-02 | 1.98E-02 |
| A_23_P327451 | 1.49  | 1.23  | 1.07  | 1.25  | 2.17  | 6.17E-02 | 1.04E-01 | 5.61E-01 |
| A_23_P46426  | -1.17 | -1.68 | -1.04 | -1.22 | -1.73 | 4.23E-01 | 1.39E-03 | 8.07E-01 |
| A_23_P348636 | -1.13 | 1.05  | -1.29 | -2.13 | -1.47 | 5.05E-01 | 7.74E-01 | 2.37E-02 |
| A_23_P501985 | -1.25 | -1.86 | -1.08 | -1.23 | -1.19 | 4.81E-01 | 5.64E-03 | 6.29E-01 |
| A_24_P585770 | -1.08 | -1.50 | -1.90 | -1.18 | -1.14 | 6.39E-01 | 6.63E-02 | 2.96E-03 |
| A_23_P348208 | 1.49  | 1.03  | 1.27  | 1.73  | 1.28  | 3.09E-01 | 8.70E-01 | 1.05E-01 |
| A_32_P119949 | -1.00 | 1.47  | 1.02  | 1.76  | 1.71  | 9.88E-01 | 1.51E-02 | 8.69E-01 |
| A_23_P76136  | -1.42 | 1.20  | -1.24 | -1.46 | -2.15 | 1.34E-01 | 4.76E-01 | 7.61E-02 |
| A_23_P17914  | 1.16  | -1.04 | 1.24  | 1.42  | 2.59  | 4.98E-01 | 7.85E-01 | 8.80E-02 |
| A_23_P253536 | 1.35  | 1.32  | 1.03  | 1.48  | 1.89  | 1.47E-01 | 7.37E-02 | 8.66E-01 |
| A_23_P17053  | 1.65  | 1.09  | -1.19 | 1.69  | 2.28  | 1.89E-01 | 2.09E-03 | 1.94E-01 |
| A_23_P6535   | 1.79  | 1.09  | 1.01  | 1.41  | 2.58  | 1.21E-01 | 3.94E-01 | 9.20E-01 |
| A_23_P16632  | -1.29 | -1.18 | -1.52 | 1.05  | -1.53 | 3.15E-01 | 4.12E-01 | 4.69E-03 |
| A_23_P169738 | 1.06  | 1.11  | 1.87  | 1.45  | 1.27  | 6.84E-01 | 3.52E-01 | 1.44E-05 |
| A_23_P135079 | 1.93  | 1.07  | -1.06 | 1.57  | 1.44  | 2.75E-03 | 5.08E-01 | 4.61E-01 |
| A_24_P710024 | -1.21 | -1.43 | -1.01 | -1.15 | -2.23 | 3.89E-01 | 7.53E-03 | 8.90E-01 |
| A_23_P3911   | -1.30 | -1.09 | -1.28 | -1.41 | -1.97 | 2.28E-02 | 3.56E-01 | 1.73E-02 |
| A_23_P43337  | -1.14 | -1.68 | -1.01 | -1.52 | -1.56 | 5.01E-01 | 2.58E-02 | 8.25E-01 |
| A_24_P659836 | 1.59  | -1.02 | 1.44  | 1.66  | 1.19  | 4.91E-02 | 8.84E-01 | 3.96E-02 |
| A_24_P109524 | 1.36  | 1.63  | 1.05  | 1.66  | -1.03 | 1.73E-01 | 4.53E-03 | 7.20E-01 |
| A_24_P315306 | -1.60 | -1.24 | 1.01  | -1.54 | -1.45 | 2.11E-02 | 1.85E-01 | 8.47E-01 |
| A_32_P171530 | -1.30 | -1.38 | -1.63 | -1.06 | -1.51 | 2.22E-01 | 1.16E-01 | 5.25E-03 |
| A_32_P117354 | -1.55 | -1.35 | -1.19 | -1.33 | -1.19 | 2.64E-04 | 1.86E-02 | 9.35E-03 |
| A_24_P413669 | 1.87  | 1.13  | 1.08  | 1.42  | 1.35  | 7.69E-03 | 3.78E-01 | 5.09E-01 |
| A_23_P382081 | -1.26 | -1.43 | -1.15 | -1.34 | -1.34 | 4.47E-02 | 4.37E-03 | 2.83E-01 |
| A_23_P205489 | 1.45  | 1.45  | 1.20  | 1.43  | 1.41  | 4.66E-02 | 2.06E-02 | 2.25E-02 |
| A_23_P52067  | 1.59  | 1.43  | 1.18  | 1.51  | 1.11  | 4.48E-02 | 1.59E-02 | 6.19E-02 |
| A_23_P161507 | -1.22 | -1.65 | -1.15 | -1.37 | -1.32 | 1.47E-01 | 2.20E-02 | 4.88E-01 |
| A_23_P57829  | -1.45 | -1.12 | -1.14 | -1.49 | -1.53 | 1.63E-01 | 4.58E-01 | 3.88E-01 |
| A_24_P137713 | 1.55  | 1.03  | 1.21  | 1.33  | 2.06  | 3.08E-02 | 8.55E-01 | 4.31E-01 |
| A_24_P370946 | -1.10 | -1.64 | -1.05 | -1.29 | -1.81 | 5.34E-01 | 2.94E-03 | 7.50E-01 |
| A_24_P925186 | -1.15 | -1.07 | -1.30 | -1.52 | -1.31 | 5.68E-01 | 6.66E-01 | 5.27E-02 |

|              |       |       |       |       |       |          |          |          |
|--------------|-------|-------|-------|-------|-------|----------|----------|----------|
| A_23_P26024  | -1.24 | -1.66 | -1.08 | 1.15  | -2.27 | 1.68E-01 | 3.32E-04 | 5.61E-01 |
| A_23_P369210 | 1.39  | 1.13  | 1.13  | 1.71  | 1.60  | 1.20E-01 | 6.03E-01 | 3.25E-01 |
| A_23_P128609 | 1.24  | -1.02 | 1.45  | 1.50  | 1.17  | 2.36E-01 | 9.24E-01 | 4.51E-02 |
| A_23_P424637 | -1.28 | -1.34 | -1.03 | -1.26 | -1.91 | 1.29E-01 | 5.65E-02 | 7.27E-01 |
| A_23_P81262  | -1.89 | -1.20 | -1.08 | -1.17 | -1.57 | 6.43E-03 | 1.99E-01 | 6.86E-01 |
| A_23_P34325  | 1.39  | 1.12  | 1.31  | 1.19  | 2.46  | 2.86E-01 | 3.75E-01 | 9.99E-02 |
| A_23_P217972 | 1.51  | 1.18  | -1.02 | 1.79  | 1.45  | 4.69E-02 | 2.14E-01 | 8.00E-01 |
| A_32_P9753   | 1.30  | 1.31  | 1.23  | 1.69  | 1.12  | 3.07E-02 | 4.47E-02 | 2.73E-02 |
| A_24_P404840 | 1.61  | 1.47  | 1.58  | 1.01  | -1.04 | 5.08E-02 | 1.99E-02 | 2.00E-03 |
| A_32_P233735 | 1.64  | 1.33  | 1.28  | 1.26  | 1.36  | 2.13E-01 | 3.08E-01 | 1.99E-01 |
| A_23_P44264  | -1.32 | -1.15 | -1.79 | -1.53 | 1.08  | 1.40E-02 | 2.31E-01 | 2.43E-05 |
| A_32_P235358 | 1.36  | -1.09 | 1.16  | 1.59  | 1.88  | 1.34E-01 | 5.13E-01 | 1.74E-01 |
| A_24_P784846 | 1.15  | 1.38  | 1.04  | 1.25  | 2.19  | 3.23E-01 | 1.49E-02 | 8.36E-01 |
| A_23_P5903   | 1.52  | 1.40  | 1.07  | 1.30  | 1.52  | 2.09E-02 | 6.75E-03 | 2.14E-01 |
| A_23_P145889 | -1.94 | -1.37 | -1.06 | -1.61 | 1.09  | 5.53E-02 | 1.99E-01 | 6.85E-01 |
| A_24_P921546 | -1.11 | -1.25 | -1.52 | -1.08 | -2.18 | 8.04E-01 | 3.89E-01 | 8.27E-02 |
| A_23_P304897 | 1.32  | 1.31  | 1.06  | 1.34  | 1.91  | 9.46E-02 | 1.33E-02 | 3.87E-01 |
| A_32_P228625 | 1.22  | 1.45  | -1.02 | 1.57  | 1.62  | 2.43E-01 | 6.85E-02 | 8.74E-01 |
| A_24_P358137 | -1.41 | -1.19 | -1.09 | -1.35 | -1.64 | 1.37E-02 | 2.41E-01 | 4.33E-01 |
| A_24_P323974 | 2.31  | 1.07  | -1.02 | 1.32  | 1.45  | 9.16E-03 | 7.44E-01 | 8.94E-01 |
| A_32_P8732   | 1.19  | 1.58  | 1.19  | 1.37  | 1.41  | 2.90E-01 | 8.85E-03 | 3.25E-02 |
| A_23_P65618  | 1.32  | 1.04  | 1.06  | 1.64  | 1.58  | 2.25E-01 | 8.91E-01 | 4.33E-01 |
| A_23_P29975  | 1.20  | 1.40  | 1.03  | 1.45  | 1.92  | 1.88E-01 | 2.79E-02 | 9.07E-01 |
| A_24_P33667  | -1.36 | -1.01 | -1.09 | -1.36 | -2.56 | 1.97E-01 | 9.38E-01 | 5.61E-01 |
| A_23_P216340 | -1.98 | -1.80 | -1.15 | -1.08 | 1.07  | 6.43E-03 | 1.03E-03 | 9.30E-02 |
| A_24_P203000 | -1.35 | -1.48 | -1.50 | -1.05 | 1.12  | 1.22E-01 | 1.22E-02 | 2.43E-03 |
| A_23_P407206 | 1.29  | 1.05  | 1.34  | 1.44  | 1.59  | 1.66E-01 | 7.65E-01 | 8.70E-02 |
| A_23_P88626  | -1.34 | -1.39 | -1.10 | -1.52 | -1.32 | 3.89E-01 | 7.19E-02 | 4.70E-01 |
| A_23_P402254 | 1.03  | -1.02 | 1.60  | 1.43  | 2.18  | 8.92E-01 | 8.89E-01 | 9.22E-03 |
| A_23_P256107 | 1.82  | -1.03 | 1.11  | 1.70  | 1.50  | 2.13E-01 | 8.70E-01 | 5.95E-01 |
| A_23_P302568 | 1.31  | 1.13  | 1.24  | 1.42  | 1.50  | 2.47E-01 | 6.56E-01 | 2.13E-01 |
| A_32_P128209 | 1.13  | 1.52  | 1.45  | 1.21  | 1.61  | 3.95E-01 | 6.70E-02 | 2.53E-02 |
| A_23_P434809 | 1.38  | 1.11  | 1.46  | 1.86  | -1.06 | 5.94E-01 | 6.50E-01 | 1.34E-01 |
| A_32_P140139 | -1.15 | -1.10 | -1.22 | -2.09 | -1.29 | 5.20E-01 | 4.75E-01 | 1.59E-01 |
| A_24_P124550 | -1.60 | -1.24 | -1.24 | -1.10 | -1.74 | 5.29E-02 | 3.24E-02 | 4.96E-02 |
| A_23_P168388 | -1.14 | -1.27 | -1.32 | -1.62 | -1.08 | 2.63E-01 | 3.33E-03 | 1.10E-01 |
| A_23_P420281 | -1.58 | -1.39 | 1.03  | -1.14 | -1.27 | 6.60E-03 | 2.24E-02 | 8.74E-01 |
| A_23_P50946  | -1.28 | -1.49 | -1.03 | -1.05 | -2.27 | 1.70E-01 | 8.79E-02 | 7.82E-01 |
| A_32_P468743 | -1.38 | -1.02 | -1.49 | -1.11 | -1.18 | 1.29E-01 | 9.49E-01 | 1.09E-02 |
| A_24_P540560 | -1.01 | -1.20 | -1.05 | -1.75 | -1.79 | 9.78E-01 | 2.73E-01 | 6.89E-01 |
| A_32_P147063 | 1.35  | 1.48  | 1.24  | -1.13 | 1.76  | 2.65E-03 | 2.69E-03 | 1.44E-02 |
| A_23_P38959  | -1.46 | -1.70 | -1.11 | -1.06 | -1.42 | 5.51E-02 | 1.16E-02 | 3.50E-01 |
| A_24_P334529 | -1.29 | -1.16 | -1.49 | -1.10 | -1.53 | 1.65E-01 | 4.04E-01 | 5.17E-03 |
| A_23_P42375  | 2.17  | 1.57  | 1.12  | -1.00 | 1.13  | 2.61E-03 | 2.47E-03 | 7.87E-02 |
| A_23_P118894 | -2.21 | -1.38 | -1.38 | 1.07  | -1.27 | 7.42E-02 | 1.13E-01 | 1.51E-01 |
| A_24_P922252 | 1.02  | 1.26  | 1.01  | 1.77  | 1.82  | 9.26E-01 | 1.82E-01 | 9.33E-01 |
| A_32_P224751 | 1.26  | 1.29  | 1.28  | 1.15  | 2.04  | 2.55E-01 | 2.27E-01 | 1.33E-01 |



|              |       |       |       |       |       |          |          |          |
|--------------|-------|-------|-------|-------|-------|----------|----------|----------|
| A_24_P332461 | 1.24  | 1.08  | 1.10  | 1.48  | 1.96  | 1.73E-01 | 7.48E-01 | 5.52E-01 |
| A_23_P166297 | 1.33  | 1.37  | 1.17  | 1.18  | 1.64  | 1.40E-01 | 2.54E-02 | 1.57E-01 |
| A_24_P578437 | -1.56 | -1.78 | -1.05 | -1.19 | -1.32 | 6.86E-02 | 1.74E-02 | 5.09E-01 |
| A_32_P944444 | 1.14  | 1.30  | -1.03 | 1.71  | 1.69  | 4.81E-01 | 1.33E-01 | 7.24E-01 |
| A_23_P139166 | -2.22 | -1.16 | -1.52 | 1.03  | -1.47 | 8.39E-02 | 5.55E-01 | 1.31E-01 |
| A_23_P203900 | 1.43  | 1.72  | 1.15  | 1.10  | 1.21  | 1.18E-03 | 1.85E-04 | 1.97E-02 |
| A_24_P350656 | 1.27  | 1.00  | 1.48  | 1.33  | 1.33  | 2.70E-01 | 9.82E-01 | 9.85E-03 |
| A_23_P407565 | -1.44 | -1.52 | 1.05  | -1.36 | -1.46 | 9.18E-04 | 3.66E-02 | 5.56E-01 |
| A_23_P209116 | 1.36  | 1.10  | 1.32  | 1.50  | 1.32  | 7.54E-02 | 5.87E-01 | 6.26E-02 |
| A_23_P213288 | -1.39 | -1.07 | -1.54 | -1.19 | -1.67 | 1.23E-01 | 5.11E-01 | 2.05E-02 |
| A_23_P157766 | 1.28  | -1.01 | 1.21  | 1.11  | 2.74  | 1.56E-01 | 9.75E-01 | 2.37E-01 |
| A_23_P51339  | 1.06  | -1.63 | -1.21 | -1.44 | -1.51 | 6.30E-01 | 2.77E-03 | 6.96E-02 |
| A_24_P934832 | -1.38 | -1.10 | 1.01  | -1.44 | -1.76 | 1.45E-01 | 7.72E-01 | 9.76E-01 |
| A_23_P46141  | -1.27 | -1.42 | -1.06 | -1.40 | -1.57 | 8.91E-02 | 2.99E-02 | 4.18E-01 |
| A_24_P150160 | 1.16  | 1.29  | 2.23  | -1.38 | 1.15  | 7.81E-01 | 1.93E-01 | 4.67E-02 |
| A_23_P98477  | -1.19 | -1.20 | -1.14 | -1.41 | -1.58 | 3.32E-01 | 1.77E-01 | 2.67E-01 |
| A_32_P70875  | -1.16 | 1.92  | 1.16  | 1.31  | 1.52  | 2.91E-01 | 1.15E-03 | 5.02E-02 |
| A_24_P892612 | 1.43  | -1.28 | -1.43 | -1.53 | -1.35 | 3.37E-01 | 1.58E-01 | 7.93E-02 |
| A_23_P500300 | 1.32  | 1.10  | 1.23  | 1.57  | -1.07 | 5.14E-01 | 7.05E-01 | 4.82E-01 |
| A_23_P85250  | 1.34  | 1.26  | 1.27  | 1.68  | 1.04  | 1.83E-01 | 6.00E-02 | 2.04E-02 |
| A_23_P13048  | 1.89  | 1.18  | 1.16  | 1.35  | 1.11  | 9.40E-03 | 3.66E-01 | 4.02E-01 |
| A_23_P169030 | 2.00  | 1.14  | 1.44  | 1.24  | 1.28  | 2.20E-02 | 1.91E-01 | 2.84E-02 |
| A_23_P399078 | -1.44 | -1.14 | 1.00  | -1.81 | -1.34 | 1.11E-01 | 2.36E-01 | 9.98E-01 |
| A_32_P172141 | -1.35 | -1.64 | -1.16 | -1.33 | -1.01 | 2.52E-02 | 5.27E-03 | 1.04E-02 |
| A_24_P194688 | -1.62 | -1.05 | -1.44 | -1.28 | 1.16  | 3.29E-02 | 8.77E-01 | 1.33E-02 |
| A_23_P27784  | 1.30  | 1.14  | 1.77  | -1.10 | 1.63  | 1.29E-01 | 4.60E-01 | 4.27E-03 |
| A_32_P154473 | -1.07 | -1.81 | -1.03 | -1.42 | -1.27 | 6.14E-01 | 2.57E-03 | 8.26E-01 |
| A_24_P788878 | 1.32  | 1.19  | 1.57  | 1.16  | 1.10  | 5.05E-02 | 2.32E-01 | 8.04E-04 |
| A_24_P832737 | 1.80  | 1.06  | 1.17  | 1.17  | 2.07  | 6.22E-02 | 7.79E-01 | 3.05E-01 |
| A_24_P247303 | -1.11 | -1.38 | -1.29 | 1.14  | -1.74 | 8.00E-01 | 2.68E-01 | 2.90E-01 |
| A_24_P393958 | 1.05  | -1.60 | -1.14 | -1.47 | -1.58 | 6.10E-01 | 1.61E-03 | 1.31E-01 |
| A_23_P41227  | -1.51 | -1.28 | -1.25 | -1.08 | -1.64 | 8.64E-02 | 9.82E-02 | 8.91E-02 |
| A_23_P300867 | -1.14 | -1.31 | -1.72 | -1.41 | -1.21 | 3.87E-01 | 1.66E-01 | 9.86E-03 |
| A_23_P65386  | 1.48  | 1.27  | 1.15  | 1.08  | 2.33  | 1.32E-01 | 1.97E-02 | 2.97E-01 |
| A_23_P212781 | 1.00  | -1.12 | -1.28 | -1.72 | -1.38 | 9.97E-01 | 4.23E-01 | 1.91E-01 |
| A_23_P152838 | -1.39 | -1.16 | -1.24 | 1.01  | -1.97 | 8.84E-02 | 5.70E-01 | 3.74E-01 |
| A_23_P201193 | 1.21  | -1.41 | -1.82 | -1.41 | 1.36  | 4.94E-01 | 9.75E-02 | 1.17E-04 |
| A_32_P154830 | 1.75  | 1.14  | 1.08  | 1.26  | 1.55  | 4.66E-03 | 1.94E-01 | 3.37E-01 |
| A_32_P25065  | 1.43  | 1.14  | 1.53  | 1.25  | 2.00  | 3.54E-01 | 4.50E-01 | 1.27E-01 |
| A_24_P160466 | 1.20  | 1.30  | 1.63  | -1.01 | 1.14  | 4.77E-01 | 1.09E-02 | 2.54E-03 |
| A_23_P408376 | 1.66  | 1.39  | 1.00  | 1.11  | 1.55  | 2.86E-03 | 4.91E-02 | 9.89E-01 |
| A_24_P919920 | 1.19  | 1.27  | 1.04  | 1.60  | 2.04  | 3.92E-01 | 1.86E-01 | 6.00E-01 |
| A_23_P162739 | -1.15 | -1.04 | -1.24 | -1.41 | -2.18 | 2.82E-01 | 5.46E-01 | 6.63E-03 |
| A_24_P307695 | -1.07 | -1.90 | -1.04 | -1.87 | -1.12 | 4.65E-01 | 3.21E-03 | 5.91E-01 |
| A_23_P45456  | -1.14 | -1.35 | -1.57 | -1.15 | 1.28  | 5.75E-01 | 2.46E-03 | 4.17E-02 |
| A_32_P162797 | -1.54 | -1.21 | -1.16 | -1.44 | -1.31 | 5.03E-03 | 3.04E-02 | 5.45E-02 |
| A_23_P76145  | 1.19  | 1.10  | 1.22  | 1.61  | 1.13  | 3.18E-01 | 7.32E-01 | 5.46E-02 |

|              |       |       |       |       |       |          |          |          |
|--------------|-------|-------|-------|-------|-------|----------|----------|----------|
| A_23_P73096  | 1.26  | 1.11  | 1.91  | 1.20  | 1.35  | 4.11E-01 | 5.83E-01 | 2.95E-02 |
| A_32_P16931  | 1.33  | 1.19  | 1.33  | 1.27  | 1.42  | 4.07E-02 | 4.16E-01 | 5.67E-02 |
| A_23_P46429  | -1.13 | -1.64 | 1.00  | -1.23 | -1.65 | 4.96E-01 | 1.43E-03 | 9.95E-01 |
| A_23_P100660 | -1.46 | -1.29 | -1.11 | -1.83 | 1.06  | 7.57E-02 | 3.70E-02 | 3.14E-01 |
| A_24_P913900 | -1.08 | -1.72 | 1.09  | -1.48 | -1.46 | 6.89E-01 | 1.42E-02 | 6.76E-01 |
| A_23_P151297 | -1.40 | -1.18 | -1.09 | -1.18 | -1.97 | 3.33E-02 | 8.22E-02 | 3.92E-01 |
| A_24_P152325 | 2.02  | 1.05  | 1.10  | 1.18  | 1.64  | 2.06E-02 | 7.91E-01 | 4.43E-01 |
| A_32_P218875 | 1.37  | 1.20  | 1.12  | 1.48  | 1.85  | 1.09E-01 | 1.10E-01 | 2.75E-01 |
| A_32_P332320 | 1.33  | 1.26  | -1.14 | 1.58  | 2.02  | 2.17E-03 | 1.26E-01 | 1.34E-01 |
| A_23_P302404 | -1.52 | -1.26 | -1.21 | -1.26 | -1.31 | 1.38E-02 | 1.47E-01 | 8.73E-02 |
| A_23_P160559 | 1.53  | 1.28  | 1.23  | -1.07 | 1.80  | 1.66E-02 | 5.01E-02 | 5.31E-02 |
| A_32_P213831 | 1.44  | 1.33  | 1.13  | 1.01  | 2.13  | 2.41E-01 | 2.31E-01 | 3.38E-01 |
| A_32_P153244 | -1.73 | -1.56 | -1.07 | -1.28 | -1.03 | 3.77E-03 | 3.37E-02 | 4.36E-01 |
| A_23_P104555 | -1.07 | 1.01  | 1.37  | 1.51  | 2.08  | 7.02E-01 | 9.52E-01 | 1.51E-02 |
| A_23_P203702 | -1.42 | -1.27 | -1.09 | -1.06 | -1.88 | 2.28E-02 | 1.87E-02 | 1.60E-01 |
| A_23_P200222 | 1.21  | -1.00 | 1.23  | 1.28  | 2.27  | 4.19E-01 | 9.99E-01 | 7.08E-02 |
| A_24_P347378 | -1.13 | -1.71 | -1.24 | -1.11 | -1.14 | 5.57E-01 | 6.66E-03 | 1.19E-01 |
| A_24_P295590 | -1.56 | -1.49 | -1.42 | 1.20  | -1.27 | 3.60E-02 | 2.57E-03 | 2.96E-02 |
| A_23_P50646  | 1.49  | 1.43  | 1.30  | 1.18  | -1.18 | 5.00E-03 | 2.11E-03 | 3.18E-02 |
| A_32_P66035  | 1.45  | 1.29  | 1.04  | 1.40  | 1.73  | 9.57E-02 | 2.98E-02 | 6.88E-01 |
| A_24_P76635  | 1.22  | -1.02 | 1.36  | 1.72  | 1.17  | 4.42E-01 | 9.40E-01 | 1.26E-01 |
| A_23_P145529 | -1.11 | -1.56 | -1.30 | -1.59 | 1.01  | 4.99E-01 | 9.28E-03 | 5.75E-02 |
| A_23_P207981 | 1.93  | 1.01  | 1.16  | 1.23  | 1.34  | 2.60E-03 | 9.29E-01 | 4.44E-01 |
| A_24_P347411 | -1.15 | -1.01 | -1.37 | -1.70 | -1.48 | 4.75E-01 | 9.26E-01 | 9.70E-03 |
| A_32_P234849 | -1.44 | -1.07 | -1.19 | -1.10 | -1.93 | 5.94E-02 | 7.24E-01 | 6.25E-02 |
| A_23_P406928 | -1.56 | -1.42 | -1.06 | -1.27 | -1.40 | 2.47E-02 | 8.92E-03 | 4.54E-01 |
| A_32_P419502 | 1.33  | -1.06 | 1.36  | 1.62  | 1.02  | 3.56E-01 | 8.36E-01 | 9.54E-02 |
| A_32_P108748 | 1.74  | 1.42  | -1.00 | 1.18  | 1.45  | 4.96E-02 | 5.55E-03 | 9.95E-01 |
| A_23_P76538  | -1.89 | -1.64 | -1.12 | 1.00  | -1.10 | 1.12E-01 | 4.13E-02 | 6.03E-01 |
| A_24_P147849 | 1.05  | -1.61 | -1.83 | -1.19 | -1.28 | 8.96E-01 | 2.14E-01 | 4.33E-02 |
| A_32_P104334 | 1.51  | 1.68  | 1.22  | -1.09 | 1.11  | 2.37E-02 | 3.11E-04 | 1.51E-01 |
| A_24_P407742 | 1.12  | 1.25  | 1.15  | 1.52  | 1.93  | 2.85E-01 | 1.90E-01 | 2.28E-01 |
| A_23_P208167 | -1.60 | -1.21 | -1.45 | -1.14 | -1.89 | 1.30E-01 | 7.26E-02 | 6.04E-02 |
| A_23_P143461 | 1.61  | 1.33  | 2.81  | 1.27  | 1.03  | 3.20E-01 | 1.54E-01 | 3.86E-02 |
| A_24_P168398 | -1.51 | -1.30 | -1.33 | -1.29 | 1.20  | 5.86E-02 | 1.59E-01 | 1.91E-01 |
| A_32_P187571 | -1.29 | -1.16 | -1.11 | -1.36 | -1.73 | 1.20E-01 | 3.99E-01 | 5.95E-01 |
| A_24_P935400 | -1.10 | 1.45  | 1.25  | 1.50  | 1.61  | 5.99E-01 | 1.88E-01 | 2.56E-01 |
| A_24_P682285 | -1.25 | -1.21 | -1.02 | -1.41 | -1.93 | 9.49E-02 | 1.44E-01 | 8.37E-01 |
| A_32_P207802 | -1.02 | 1.62  | 1.05  | 1.49  | 1.52  | 8.35E-01 | 8.59E-03 | 5.71E-01 |
| A_23_P39056  | 1.28  | -1.22 | 1.17  | 1.69  | 1.40  | 1.88E-01 | 4.44E-01 | 3.26E-02 |
| A_24_P238143 | -1.25 | -1.05 | -1.14 | -1.08 | -2.43 | 1.81E-01 | 7.86E-01 | 1.17E-01 |
| A_23_P356330 | 1.57  | 1.03  | 1.17  | 1.39  | 1.37  | 2.86E-03 | 7.44E-01 | 4.16E-02 |
| A_23_P95070  | -1.04 | 1.12  | 1.28  | 1.53  | 1.93  | 8.36E-01 | 2.71E-01 | 9.36E-02 |
| A_23_P370408 | 1.33  | -1.01 | -1.09 | 1.88  | 1.53  | 1.37E-01 | 9.62E-01 | 7.89E-01 |
| A_23_P321949 | 1.08  | -1.42 | -1.25 | -1.59 | -1.01 | 8.17E-01 | 2.63E-01 | 3.94E-01 |
| A_24_P560519 | 1.05  | 1.35  | 1.27  | 1.23  | 1.66  | 7.13E-01 | 1.17E-02 | 2.02E-02 |
| A_32_P94     | -1.31 | 1.04  | -1.17 | -1.61 | -1.04 | 1.49E-02 | 8.72E-01 | 5.18E-01 |

|              |       |       |       |       |       |          |          |          |
|--------------|-------|-------|-------|-------|-------|----------|----------|----------|
| A_23_P385105 | 1.15  | 1.34  | 1.66  | 1.22  | -1.04 | 6.40E-01 | 8.61E-02 | 2.72E-03 |
| A_23_P27107  | 1.43  | 1.22  | 1.30  | 1.68  | 1.01  | 1.72E-01 | 1.38E-01 | 3.41E-01 |
| A_32_P57453  | 1.37  | 1.04  | 1.08  | 1.26  | 2.12  | 1.02E-01 | 5.89E-01 | 4.90E-01 |
| A_32_P83049  | 1.14  | 1.25  | 1.50  | 1.11  | 1.37  | 4.50E-01 | 8.26E-02 | 4.10E-04 |
| A_23_P109304 | -1.29 | 1.11  | -1.34 | -1.76 | -1.34 | 1.48E-01 | 4.55E-01 | 4.63E-02 |
| A_23_P358857 | -1.24 | -1.29 | -1.02 | -2.19 | -1.23 | 2.79E-01 | 3.36E-01 | 7.60E-01 |
| A_32_P117185 | 1.08  | 1.07  | 1.57  | 1.29  | 2.03  | 7.90E-01 | 6.18E-01 | 2.44E-02 |
| A_23_P137139 | -1.20 | -1.73 | -1.17 | -1.10 | -1.24 | 3.13E-01 | 1.46E-03 | 2.27E-01 |
| A_24_P358406 | -1.45 | -1.16 | -1.27 | -1.03 | -1.96 | 3.25E-01 | 4.76E-01 | 3.75E-01 |
| A_23_P315252 | -1.42 | -1.45 | -1.07 | -1.20 | -1.48 | 3.65E-02 | 4.29E-03 | 2.96E-01 |
| A_32_P219581 | 1.36  | 1.36  | 1.15  | 1.25  | 1.23  | 1.33E-01 | 2.51E-02 | 4.05E-01 |
| A_24_P107317 | 1.22  | 1.08  | 1.30  | 1.38  | 1.82  | 4.08E-01 | 6.16E-01 | 1.85E-01 |
| A_23_P19030  | 1.68  | 1.48  | 1.11  | 1.20  | 1.15  | 2.15E-02 | 5.07E-03 | 2.29E-01 |
| A_23_P128230 | -1.27 | -1.37 | -1.34 | 1.08  | -1.30 | 2.70E-01 | 2.33E-02 | 2.89E-02 |
| A_24_P24002  | 1.71  | 1.03  | -1.05 | 1.54  | 1.56  | 8.18E-02 | 8.92E-01 | 7.43E-01 |
| A_24_P165205 | -1.21 | -1.16 | -1.30 | -1.51 | -1.43 | 5.36E-01 | 3.90E-01 | 2.54E-01 |
| A_32_P13337  | -1.21 | 1.78  | 1.27  | 1.22  | 1.33  | 3.77E-01 | 3.84E-03 | 4.57E-02 |
| A_23_P21976  | 1.04  | 1.51  | -1.06 | 1.68  | 1.57  | 7.59E-01 | 7.81E-03 | 5.88E-01 |
| A_24_P340284 | 1.17  | 1.11  | 1.15  | 1.95  | 1.13  | 5.03E-01 | 6.40E-01 | 2.10E-01 |
| A_32_P228570 | 1.19  | 1.10  | 1.59  | 1.35  | 1.17  | 7.41E-02 | 6.52E-01 | 2.12E-03 |
| A_23_P68031  | -1.39 | -1.82 | 1.09  | -1.22 | -1.32 | 7.92E-02 | 9.98E-03 | 4.65E-01 |
| A_32_P210572 | 1.44  | -1.04 | 1.65  | 1.37  | 1.20  | 6.07E-02 | 3.28E-01 | 3.00E-03 |
| A_24_P381029 | 1.30  | 2.29  | 1.05  | 1.62  | 1.46  | 1.33E-01 | 1.15E-01 | 2.76E-01 |
| A_23_P127068 | 1.29  | -1.02 | 1.26  | 1.34  | 1.83  | 1.21E-01 | 8.14E-01 | 1.12E-02 |
| A_23_P397248 | 1.17  | 2.63  | 1.31  | 1.12  | 1.38  | 4.72E-01 | 9.21E-02 | 2.78E-02 |
| A_23_P64792  | -1.12 | -1.46 | -1.60 | -1.14 | 1.03  | 3.01E-01 | 3.73E-04 | 3.32E-06 |
| A_24_P351283 | 1.51  | 1.20  | 1.35  | 1.48  | 1.09  | 9.32E-02 | 2.22E-01 | 9.53E-02 |
| A_23_P250173 | -1.17 | -1.17 | 1.05  | -1.61 | -1.65 | 6.53E-01 | 6.95E-01 | 8.14E-01 |
| A_24_P923300 | -1.79 | 1.16  | -1.11 | -1.40 | -1.24 | 1.39E-02 | 5.81E-01 | 4.55E-01 |
| A_24_P381505 | -1.32 | -1.27 | -1.14 | -1.41 | -1.43 | 2.20E-01 | 1.88E-02 | 1.61E-01 |
| A_23_P149938 | -1.00 | 1.25  | 1.12  | 1.19  | 2.19  | 9.94E-01 | 1.46E-01 | 1.11E-01 |
| A_32_P79515  | -1.26 | 1.35  | 1.19  | 1.44  | 1.87  | 3.36E-01 | 7.48E-02 | 1.95E-01 |
| A_24_P910325 | 1.44  | 1.19  | 1.20  | 1.26  | 1.49  | 8.88E-02 | 2.62E-01 | 2.32E-01 |
| A_24_P383762 | 1.15  | 1.16  | 1.37  | 1.06  | 2.15  | 5.03E-01 | 1.03E-01 | 5.59E-02 |
| A_24_P43723  | 1.19  | 1.16  | 1.06  | 1.67  | 1.94  | 6.98E-01 | 3.41E-01 | 8.06E-01 |
| A_23_P206920 | -1.81 | -1.19 | -1.11 | -1.58 | -1.16 | 5.71E-02 | 3.69E-01 | 5.27E-01 |
| A_32_P191665 | 1.04  | 1.30  | -1.05 | 1.54  | 1.78  | 8.42E-01 | 1.18E-01 | 5.80E-01 |
| A_23_P117654 | 2.20  | 1.24  | 1.03  | 1.10  | 1.18  | 4.45E-04 | 4.48E-02 | 5.78E-01 |
| A_24_P186030 | 1.24  | 1.16  | 1.41  | 1.20  | 1.41  | 1.37E-01 | 1.58E-01 | 2.87E-03 |
| A_24_P254949 | -1.21 | 1.08  | -1.50 | 1.32  | -1.35 | 4.71E-01 | 8.11E-01 | 3.23E-02 |
| A_24_P56363  | -1.14 | -1.61 | -1.08 | -1.46 | -1.12 | 1.58E-01 | 1.26E-03 | 4.42E-01 |
| A_23_P169766 | 1.13  | 1.28  | 1.34  | 1.39  | 1.21  | 3.03E-01 | 2.43E-02 | 5.23E-03 |
| A_24_P307665 | -1.05 | 1.43  | 1.22  | 1.46  | 1.54  | 7.00E-01 | 1.96E-02 | 2.23E-02 |
| A_23_P166797 | 1.56  | 1.27  | 1.28  | 1.27  | -1.42 | 2.05E-02 | 7.95E-02 | 1.20E-01 |
| A_24_P417751 | 1.53  | 1.11  | 1.11  | 1.08  | 1.60  | 1.45E-02 | 6.66E-01 | 5.72E-01 |
| A_23_P57036  | -1.27 | -1.30 | -1.17 | -1.33 | -1.44 | 1.60E-02 | 8.01E-02 | 5.20E-02 |
| A_24_P601511 | 1.22  | -1.03 | 1.33  | 1.32  | 1.27  | 4.93E-01 | 9.40E-01 | 1.48E-01 |

|              |       |       |       |       |       |          |          |          |
|--------------|-------|-------|-------|-------|-------|----------|----------|----------|
| A_32_P103131 | 1.18  | 1.51  | 1.73  | -1.26 | 1.19  | 4.77E-01 | 2.10E-02 | 2.29E-02 |
| A_23_P145874 | -1.54 | -1.53 | -1.12 | -1.41 | 1.34  | 4.79E-03 | 3.66E-02 | 3.47E-01 |
| A_24_P681011 | 1.15  | 1.10  | 1.21  | 1.25  | 1.79  | 4.23E-01 | 3.64E-01 | 7.82E-02 |
| A_23_P320070 | 1.21  | 1.21  | -1.02 | 1.81  | 1.38  | 3.81E-01 | 1.18E-01 | 8.13E-01 |
| A_23_P98335  | -1.28 | -1.29 | -1.26 | -1.33 | -1.18 | 1.78E-01 | 4.00E-02 | 1.36E-01 |
| A_23_P58588  | -1.33 | 1.01  | -1.18 | -1.53 | -1.37 | 1.26E-01 | 9.41E-01 | 4.86E-02 |
| A_32_P98574  | -1.02 | 1.46  | 1.07  | 1.37  | 1.79  | 9.33E-01 | 3.34E-02 | 5.31E-01 |
| A_32_P43717  | -1.25 | -1.06 | -1.52 | -1.50 | -1.08 | 1.30E-01 | 6.36E-01 | 9.42E-04 |
| A_23_P204947 | 1.41  | 1.02  | 1.63  | 1.05  | 1.63  | 2.82E-01 | 8.00E-01 | 5.83E-04 |
| A_23_P161197 | 1.17  | 1.14  | 1.04  | 1.31  | 1.51  | 3.74E-01 | 5.89E-01 | 8.20E-01 |
| A_23_P128744 | 1.54  | 1.06  | 1.03  | 1.49  | 1.43  | 3.34E-02 | 7.36E-01 | 8.12E-01 |
| A_32_P30238  | -1.48 | -1.44 | -1.31 | -1.04 | 1.22  | 8.11E-02 | 6.14E-02 | 1.34E-01 |
| A_24_P196024 | 1.91  | 1.04  | -1.03 | 1.47  | 1.45  | 2.41E-02 | 7.83E-01 | 7.51E-01 |
| A_32_P70158  | -1.28 | -1.31 | -1.51 | 1.04  | -1.83 | 4.54E-01 | 1.65E-01 | 5.79E-02 |
| A_23_P15734  | 1.11  | 1.10  | 2.14  | 1.30  | 1.05  | 6.24E-01 | 4.76E-01 | 1.14E-03 |
| A_23_P120883 | 1.32  | -1.19 | 1.18  | 1.46  | 1.89  | 1.29E-01 | 3.05E-01 | 1.68E-02 |
| A_23_P104073 | 1.28  | 1.05  | 1.36  | 1.40  | 1.88  | 4.09E-01 | 6.31E-01 | 1.21E-01 |
| A_24_P835500 | -1.42 | -1.25 | -1.16 | -1.46 | -1.22 | 2.54E-02 | 1.32E-02 | 1.13E-02 |
| A_24_P339024 | -1.07 | 1.37  | 1.23  | 1.28  | 1.69  | 7.23E-01 | 1.64E-02 | 4.63E-01 |
| A_32_P116660 | -1.29 | -1.61 | 1.01  | -1.24 | -1.52 | 8.12E-02 | 2.59E-02 | 8.56E-01 |
| A_23_P110184 | 1.44  | 1.12  | 1.60  | 1.16  | 1.21  | 9.58E-02 | 4.39E-01 | 2.25E-02 |
| A_32_P179964 | 1.00  | 1.07  | 1.16  | 1.38  | 2.48  | 9.71E-01 | 6.89E-01 | 1.32E-01 |
| A_23_P18903  | -1.61 | -1.61 | -1.21 | 1.04  | -1.29 | 2.25E-02 | 4.09E-02 | 4.46E-02 |
| A_23_P421483 | -1.60 | -1.23 | -1.66 | -1.19 | -1.12 | 2.21E-01 | 1.05E-01 | 4.45E-02 |
| A_24_P355649 | -1.08 | -1.53 | -1.01 | -1.30 | -1.57 | 6.95E-01 | 3.02E-03 | 9.51E-01 |
| A_23_P70688  | -1.83 | -1.34 | -1.07 | 1.07  | -1.35 | 8.69E-04 | 2.78E-02 | 2.65E-01 |
| A_23_P257763 | -1.41 | -1.33 | -1.14 | -1.28 | -1.34 | 5.20E-02 | 9.40E-03 | 1.31E-01 |
| A_23_P382302 | -1.16 | -1.39 | -1.09 | -1.73 | -1.28 | 4.03E-01 | 1.58E-01 | 2.77E-01 |
| A_23_P63557  | -1.46 | -1.21 | -1.38 | -1.13 | -1.21 | 9.08E-02 | 2.87E-01 | 1.93E-03 |
| A_23_P17134  | -1.04 | -1.06 | -1.53 | -1.05 | -1.96 | 8.21E-01 | 6.51E-01 | 1.64E-04 |
| A_23_P151915 | -1.12 | 1.37  | 1.12  | 1.20  | 2.13  | 7.09E-01 | 9.23E-02 | 4.57E-01 |
| A_23_P127557 | -1.14 | -1.34 | -1.20 | -1.26 | -1.87 | 5.01E-01 | 2.43E-01 | 1.51E-01 |
| A_32_P201107 | -1.06 | 1.26  | 1.17  | 1.45  | 1.49  | 8.58E-01 | 1.65E-01 | 5.18E-01 |
| A_23_P15798  | 1.84  | 1.20  | 1.44  | 1.19  | 1.29  | 1.23E-01 | 2.96E-01 | 2.31E-01 |
| A_24_P7950   | -1.26 | -1.59 | -1.00 | -1.20 | -1.45 | 3.24E-01 | 4.90E-03 | 9.84E-01 |
| A_32_P78816  | 1.31  | -1.02 | 1.11  | 1.18  | 6.50  | 5.46E-02 | 7.21E-01 | 1.18E-01 |
| A_23_P203920 | -1.25 | -1.16 | -1.20 | -2.01 | 1.07  | 1.82E-01 | 9.27E-02 | 5.80E-02 |
| A_23_P119196 | -1.26 | -1.29 | -1.09 | -1.20 | -2.00 | 1.64E-01 | 3.22E-02 | 3.55E-01 |
| A_32_P220671 | -1.15 | -1.14 | -1.37 | -1.13 | -1.79 | 5.18E-01 | 5.21E-01 | 4.86E-02 |
| A_24_P213715 | 1.22  | 1.04  | 1.06  | 2.13  | 1.26  | 2.11E-01 | 7.30E-01 | 6.93E-01 |
| A_23_P68487  | 1.51  | 1.17  | 1.00  | 1.38  | 1.52  | 1.62E-02 | 3.63E-02 | 9.85E-01 |
| A_32_P210106 | -1.45 | -1.19 | -1.07 | -1.31 | -2.18 | 2.99E-02 | 8.53E-02 | 5.58E-01 |
| A_23_P389426 | 1.74  | 1.04  | 1.06  | 1.13  | 1.54  | 4.78E-03 | 7.79E-01 | 6.72E-01 |
| A_23_P389588 | -1.23 | -1.32 | -1.16 | -1.68 | -1.04 | 4.37E-01 | 2.30E-01 | 4.78E-01 |
| A_24_P914155 | -1.32 | -1.39 | -1.26 | -1.00 | -1.55 | 2.31E-01 | 2.17E-01 | 1.30E-01 |
| A_23_P139912 | -1.19 | -1.20 | -1.44 | -1.44 | 1.11  | 5.54E-01 | 3.80E-01 | 5.19E-02 |
| A_23_P139123 | -1.29 | -1.13 | -1.08 | -1.97 | -1.12 | 2.23E-01 | 2.62E-01 | 4.66E-01 |

|              |       |       |       |       |       |          |          |          |
|--------------|-------|-------|-------|-------|-------|----------|----------|----------|
| A_24_P94419  | -1.23 | -1.07 | -1.30 | -1.25 | -1.81 | 1.97E-02 | 7.08E-01 | 4.93E-02 |
| A_24_P100387 | 1.46  | 1.03  | 1.48  | -1.02 | 1.58  | 7.39E-02 | 7.40E-01 | 7.81E-03 |
| A_24_P923757 | -1.32 | -1.08 | -1.05 | -1.15 | -1.97 | 1.43E-01 | 6.70E-01 | 4.94E-01 |
| A_24_P259819 | 1.14  | 1.28  | 1.12  | 1.34  | 1.46  | 5.19E-01 | 2.89E-03 | 5.34E-01 |
| A_23_P111766 | 1.17  | 1.33  | 1.01  | 1.74  | 1.21  | 2.91E-01 | 7.89E-02 | 8.50E-01 |
| A_23_P137665 | 1.26  | 1.03  | 1.66  | 1.08  | 1.37  | 3.55E-01 | 9.09E-01 | 3.63E-02 |
| A_23_P65278  | -2.23 | -1.05 | 1.00  | -1.63 | -1.29 | 4.07E-02 | 4.57E-01 | 9.78E-01 |
| A_32_P133526 | -1.17 | 1.15  | 1.51  | 1.81  | 1.24  | 3.41E-01 | 4.18E-01 | 1.00E-02 |
| A_32_P176902 | -1.46 | 1.01  | -1.69 | -1.32 | -1.38 | 3.43E-01 | 9.50E-01 | 6.34E-02 |
| A_23_P76992  | 1.34  | 1.54  | 1.10  | 1.09  | 1.28  | 1.91E-01 | 1.75E-02 | 5.72E-01 |
| A_24_P932981 | 2.03  | -1.15 | 1.23  | 1.58  | 1.25  | 1.14E-01 | 6.30E-01 | 2.93E-01 |
| A_23_P324011 | 1.42  | 1.79  | 1.04  | 1.22  | -1.03 | 2.43E-03 | 2.19E-03 | 5.12E-01 |
| A_32_P124245 | -1.09 | 1.16  | 1.27  | 1.72  | 1.41  | 8.24E-01 | 3.40E-01 | 3.50E-01 |
| A_32_P32116  | 1.79  | 1.07  | 1.26  | 1.18  | 1.53  | 1.18E-01 | 7.46E-01 | 3.01E-01 |
| A_23_P352484 | -1.77 | -1.05 | -1.22 | -1.43 | -1.18 | 1.85E-01 | 8.54E-01 | 3.50E-01 |
| A_32_P186226 | -1.15 | -1.12 | -1.05 | -1.64 | -1.70 | 4.32E-01 | 3.15E-01 | 6.76E-01 |
| A_23_P417363 | 1.40  | 1.14  | -1.04 | 1.48  | 1.88  | 2.28E-01 | 3.18E-01 | 7.59E-01 |
| A_23_P428326 | 1.46  | 1.72  | 1.08  | 1.01  | 1.23  | 3.49E-03 | 8.76E-04 | 1.33E-01 |
| A_32_P34552  | 1.25  | 1.09  | 1.02  | 1.17  | 2.21  | 7.53E-02 | 6.73E-02 | 7.88E-01 |
| A_23_P8253   | 1.42  | 1.10  | 1.14  | 1.46  | 1.18  | 1.35E-01 | 6.08E-01 | 3.17E-01 |
| A_32_P330000 | -1.11 | 1.31  | 1.08  | 1.64  | 1.78  | 5.23E-01 | 4.63E-02 | 2.91E-01 |
| A_24_P331882 | 1.56  | 1.40  | 1.04  | 1.05  | 1.04  | 4.30E-02 | 5.22E-02 | 8.64E-01 |
| A_24_P111061 | -1.19 | -1.32 | -1.23 | -1.36 | -1.31 | 4.67E-01 | 2.26E-01 | 9.68E-03 |
| A_23_P402765 | 1.13  | 1.38  | 1.18  | 1.68  | 1.15  | 5.70E-01 | 1.24E-01 | 4.17E-01 |
| A_24_P64344  | 1.37  | 1.22  | 1.13  | 1.39  | 1.33  | 9.03E-02 | 1.53E-01 | 1.65E-01 |
| A_23_P379034 | 1.47  | 1.19  | 1.17  | 1.41  | 1.34  | 3.60E-02 | 1.60E-02 | 1.76E-02 |
| A_24_P913666 | 1.08  | 1.21  | 1.16  | 1.33  | 1.74  | 6.74E-01 | 2.01E-01 | 2.11E-01 |
| A_24_P397294 | -1.54 | -1.31 | -1.12 | 1.08  | -1.50 | 7.77E-04 | 1.48E-02 | 1.99E-01 |
| A_32_P142586 | 1.19  | -1.04 | 1.35  | 1.85  | 1.36  | 3.72E-01 | 7.50E-01 | 2.19E-02 |
| A_24_P110601 | -1.56 | -1.32 | -1.20 | -1.11 | -1.13 | 4.87E-02 | 1.99E-03 | 6.40E-02 |
| A_24_P933319 | -1.26 | -1.35 | -1.10 | -1.97 | 1.15  | 2.90E-01 | 8.79E-02 | 4.74E-01 |
| A_24_P281730 | 1.69  | 1.10  | 1.14  | -1.00 | 1.69  | 1.18E-02 | 3.90E-01 | 3.56E-01 |
| A_23_P369328 | -1.53 | -1.21 | -1.09 | 1.06  | -1.74 | 1.53E-03 | 3.92E-05 | 3.04E-01 |
| A_32_P206899 | -1.01 | 1.27  | 1.11  | 2.06  | 1.33  | 9.53E-01 | 7.31E-03 | 5.51E-01 |
| A_23_P143676 | -1.30 | -1.36 | -1.37 | 1.11  | -1.53 | 3.55E-02 | 5.82E-03 | 1.98E-04 |
| A_23_P128486 | 1.89  | 1.13  | 1.12  | 1.24  | 1.32  | 2.49E-03 | 1.66E-02 | 1.04E-01 |
| A_23_P13083  | 1.20  | 1.29  | 1.63  | 1.09  | 1.01  | 3.84E-01 | 1.37E-01 | 2.41E-03 |
| A_24_P804992 | -1.29 | -1.17 | -1.07 | -1.69 | -1.28 | 2.01E-01 | 2.82E-01 | 5.06E-01 |
| A_23_P36397  | 1.20  | 1.20  | -1.13 | 1.41  | 1.61  | 4.75E-01 | 3.90E-01 | 6.31E-01 |
| A_32_P94685  | 1.41  | -1.12 | -1.01 | 1.48  | 1.53  | 9.75E-02 | 6.53E-01 | 9.64E-01 |
| A_24_P366566 | 1.24  | 1.43  | -1.05 | 1.36  | 1.57  | 1.94E-01 | 4.90E-02 | 5.97E-01 |
| A_23_P254790 | -1.07 | -1.29 | -1.14 | -1.21 | -1.55 | 6.45E-01 | 9.33E-04 | 2.73E-01 |
| A_23_P41824  | 1.13  | 1.39  | 1.11  | 1.68  | 1.15  | 2.03E-01 | 1.25E-03 | 4.44E-01 |
| A_23_P354805 | -1.32 | -1.14 | -1.42 | -1.71 | 1.22  | 1.58E-02 | 1.50E-01 | 3.21E-04 |
| A_32_P147696 | -1.27 | -1.69 | -1.14 | -1.04 | -1.20 | 2.11E-02 | 4.15E-04 | 7.50E-02 |
| A_24_P667838 | -1.06 | 1.66  | 1.13  | 1.35  | 1.58  | 6.67E-01 | 4.04E-02 | 1.21E-01 |
| A_23_P392470 | -1.51 | -1.23 | -1.59 | -1.25 | 1.24  | 5.84E-02 | 6.53E-02 | 1.56E-02 |

|              |       |       |       |       |       |          |          |          |
|--------------|-------|-------|-------|-------|-------|----------|----------|----------|
| A_23_P25069  | 1.96  | 1.36  | 1.33  | 1.01  | -1.15 | 2.95E-03 | 9.15E-02 | 9.91E-04 |
| A_32_P211188 | 1.16  | 1.30  | 1.24  | 1.15  | 1.70  | 3.47E-01 | 5.73E-02 | 1.75E-01 |
| A_24_P608007 | 1.53  | 1.29  | -1.01 | 1.47  | 1.36  | 1.66E-01 | 3.00E-02 | 9.22E-01 |
| A_23_P214627 | -1.49 | -1.55 | 1.01  | -1.12 | -1.38 | 5.06E-02 | 6.26E-03 | 8.65E-01 |
| A_23_P502078 | 1.03  | 1.22  | 1.45  | 1.30  | 1.57  | 8.50E-01 | 6.33E-02 | 7.45E-02 |
| A_32_P106944 | -1.13 | -1.16 | -1.21 | -1.37 | -1.52 | 2.75E-01 | 3.41E-01 | 9.39E-02 |
| A_24_P68311  | -1.34 | -1.11 | -1.18 | -1.22 | -1.66 | 1.47E-01 | 5.10E-01 | 5.57E-02 |
| A_24_P60680  | 1.25  | 1.19  | 1.29  | 1.31  | 1.29  | 2.06E-01 | 2.75E-01 | 9.85E-02 |
| A_23_P2793   | -1.22 | -1.67 | -1.22 | -1.09 | 1.08  | 2.59E-01 | 8.52E-03 | 9.90E-02 |
| A_23_P101642 | -1.85 | -1.04 | -1.16 | -1.22 | -1.38 | 1.46E-02 | 7.54E-01 | 2.57E-01 |
| A_23_P348227 | -1.29 | -1.12 | -1.51 | -1.22 | -1.09 | 7.14E-02 | 3.25E-01 | 3.25E-04 |
| A_24_P301655 | -1.89 | -1.35 | 1.03  | -1.19 | -1.07 | 3.59E-03 | 1.51E-03 | 7.94E-01 |
| A_23_P128650 | 1.23  | 1.26  | 1.26  | 1.18  | 1.54  | 1.15E-01 | 1.52E-02 | 7.42E-03 |
| A_24_P204334 | -1.53 | -1.44 | -1.02 | -1.25 | -1.30 | 3.60E-02 | 7.12E-03 | 8.07E-01 |
| A_23_P397208 | -1.62 | -1.06 | -1.22 | -1.31 | -1.30 | 2.18E-02 | 6.25E-01 | 2.44E-02 |
| A_24_P347065 | -1.53 | -1.07 | -1.31 | -1.12 | -1.32 | 3.32E-03 | 5.54E-01 | 7.79E-02 |
| A_23_P348257 | -1.47 | -1.32 | 1.16  | -1.37 | -1.54 | 5.24E-02 | 8.81E-03 | 7.67E-02 |
| A_23_P359277 | 1.47  | 1.04  | 1.17  | 1.38  | 1.70  | 9.60E-02 | 1.92E-01 | 1.01E-01 |
| A_23_P431268 | -1.33 | -1.10 | -1.20 | -1.14 | -1.99 | 1.38E-01 | 2.80E-01 | 7.68E-02 |
| A_23_P157338 | 1.43  | -1.24 | 1.25  | 1.15  | 1.81  | 7.04E-02 | 3.75E-01 | 1.39E-01 |
| A_23_P369343 | 1.38  | 1.13  | 1.04  | 1.58  | 1.28  | 1.01E-01 | 1.91E-01 | 5.25E-01 |
| A_32_P163247 | -1.46 | -1.89 | -1.09 | -1.03 | 1.03  | 2.52E-02 | 2.49E-02 | 5.52E-01 |
| A_24_P915300 | -1.36 | -1.23 | -1.04 | -1.42 | -1.41 | 8.42E-02 | 3.83E-01 | 6.71E-01 |
| A_24_P246717 | -1.21 | -1.30 | -1.05 | -1.81 | -1.10 | 4.81E-02 | 1.66E-01 | 5.86E-01 |
| A_32_P25243  | 1.46  | 1.22  | 1.17  | 1.07  | 2.12  | 1.72E-01 | 1.85E-01 | 4.76E-01 |
| A_23_P40415  | -1.42 | 1.11  | -1.20 | -1.35 | -1.22 | 1.58E-01 | 6.62E-01 | 2.19E-01 |
| A_23_P78053  | -1.51 | -1.41 | -1.19 | 1.01  | -1.40 | 3.03E-02 | 1.72E-03 | 8.27E-03 |
| A_23_P369701 | 1.24  | 1.39  | 1.02  | 1.23  | 1.58  | 1.14E-01 | 1.15E-02 | 6.83E-01 |
| A_23_P87727  | -1.17 | -1.50 | -1.27 | -1.15 | -1.21 | 3.64E-01 | 6.02E-02 | 1.82E-01 |
| A_24_P355267 | 1.31  | 1.20  | 1.03  | 1.43  | 1.45  | 3.34E-02 | 7.58E-02 | 7.48E-01 |
| A_24_P165864 | -1.87 | -1.63 | -1.07 | -1.29 | -1.10 | 4.96E-02 | 9.43E-02 | 5.04E-01 |
| A_24_P123385 | -1.49 | -1.51 | -1.08 | -1.29 | -1.10 | 4.59E-02 | 5.25E-02 | 4.79E-01 |
| A_32_P136622 | 1.28  | 1.19  | 1.12  | 1.54  | 1.57  | 3.96E-01 | 2.40E-01 | 5.84E-01 |
| A_23_P8513   | -1.27 | -1.43 | 1.00  | -1.15 | -1.23 | 1.81E-01 | 1.33E-02 | 9.96E-01 |
| A_32_P180825 | 1.54  | 1.40  | -1.11 | 1.04  | 1.71  | 4.75E-03 | 3.11E-02 | 2.23E-01 |
| A_23_P258912 | -1.35 | -1.29 | -1.26 | -1.15 | 1.14  | 1.19E-02 | 1.35E-02 | 1.02E-01 |
| A_32_P221641 | -1.09 | 1.18  | 1.81  | 1.56  | 1.26  | 6.60E-01 | 1.67E-01 | 2.24E-02 |
| A_23_P501634 | 1.60  | 1.09  | 1.31  | 1.23  | 1.42  | 3.41E-02 | 4.79E-01 | 1.12E-01 |
| A_23_P318904 | -1.19 | -1.41 | 1.07  | -1.45 | -1.50 | 2.39E-01 | 3.31E-04 | 4.19E-01 |
| A_23_P142830 | -1.25 | -1.18 | -1.00 | -1.37 | -1.72 | 2.73E-01 | 1.15E-01 | 9.87E-01 |
| A_23_P26824  | 1.44  | 1.39  | 1.19  | 1.57  | -1.33 | 9.29E-03 | 2.92E-02 | 7.30E-02 |
| A_32_P40288  | -1.34 | -1.26 | 1.01  | -1.64 | -1.12 | 2.22E-01 | 1.77E-02 | 9.49E-01 |
| A_24_P316586 | 1.26  | 1.28  | 1.12  | 1.68  | 1.04  | 1.73E-01 | 2.17E-01 | 2.58E-01 |
| A_23_P124095 | 1.37  | 1.01  | 1.18  | 1.50  | 1.12  | 2.75E-01 | 9.73E-01 | 2.12E-01 |
| A_23_P390518 | 1.45  | 1.08  | 1.12  | 1.89  | 1.42  | 1.73E-01 | 5.90E-01 | 3.37E-01 |
| A_32_P94631  | 1.32  | 1.32  | 1.25  | 1.21  | 1.19  | 1.93E-01 | 2.06E-01 | 3.62E-01 |
| A_24_P173790 | 1.08  | 1.55  | -1.10 | 1.50  | 1.37  | 6.62E-01 | 1.69E-02 | 4.03E-01 |

|              |       |       |       |       |       |          |          |          |
|--------------|-------|-------|-------|-------|-------|----------|----------|----------|
| A_23_P420863 | 1.05  | 1.17  | 1.19  | 1.52  | 1.49  | 6.64E-01 | 1.55E-01 | 2.18E-02 |
| A_24_P218805 | -1.24 | -1.46 | -1.13 | -1.00 | -1.41 | 1.60E-01 | 3.16E-03 | 3.08E-01 |
| A_23_P502470 | -1.25 | -1.09 | -1.02 | -1.74 | -1.41 | 3.97E-02 | 3.88E-01 | 8.41E-01 |
| A_24_P466102 | 1.01  | 1.22  | 1.87  | 1.07  | 1.15  | 9.79E-01 | 2.05E-01 | 1.55E-03 |
| A_23_P106806 | 1.82  | -1.04 | 1.32  | 1.53  | -1.13 | 1.08E-01 | 8.16E-01 | 4.37E-03 |
| A_24_P665185 | -1.10 | 1.28  | 1.46  | 1.43  | 1.19  | 4.56E-01 | 5.99E-02 | 6.86E-04 |
| A_23_P2293   | -1.40 | -1.10 | -1.40 | 1.05  | -1.89 | 2.23E-01 | 3.62E-01 | 2.55E-02 |
| A_24_P218265 | 1.84  | 1.16  | 1.26  | 1.23  | -1.24 | 2.29E-03 | 6.20E-02 | 2.53E-02 |
| A_32_P88817  | -1.21 | 1.21  | 1.24  | 1.41  | 1.79  | 4.29E-01 | 2.13E-01 | 2.70E-01 |
| A_32_P126362 | 1.08  | 1.54  | -1.18 | 1.26  | 1.82  | 5.64E-01 | 1.55E-02 | 3.72E-01 |
| A_23_P87952  | -1.29 | -1.02 | -1.24 | -1.18 | -1.70 | 2.71E-01 | 8.82E-01 | 1.67E-02 |
| A_32_P168375 | 1.92  | 1.23  | -1.07 | 1.21  | 1.17  | 1.36E-02 | 2.93E-01 | 7.11E-01 |
| A_23_P104563 | -1.38 | -1.16 | -1.36 | -1.17 | -1.29 | 4.84E-02 | 1.37E-01 | 8.40E-03 |
| A_32_P77225  | 1.16  | 1.56  | 1.18  | 1.29  | 1.08  | 3.14E-01 | 1.40E-02 | 1.06E-01 |
| A_24_P273360 | 1.19  | 1.42  | 1.02  | 1.51  | 1.46  | 3.78E-01 | 5.06E-02 | 8.66E-01 |
| A_24_P76319  | 1.63  | 2.05  | 1.07  | 1.06  | 1.15  | 3.52E-02 | 1.09E-01 | 7.72E-01 |
| A_23_P167497 | -1.38 | 1.05  | -1.26 | -1.41 | -1.59 | 1.08E-01 | 6.50E-01 | 1.53E-01 |
| A_24_P218151 | 1.33  | 1.10  | 1.28  | 1.50  | 1.35  | 2.03E-01 | 1.56E-01 | 8.67E-02 |
| A_24_P412486 | 1.02  | 1.71  | 1.17  | 1.31  | 1.44  | 8.77E-01 | 2.04E-02 | 5.34E-02 |
| A_23_P214681 | 1.41  | 1.24  | 1.30  | 1.23  | 1.16  | 1.14E-01 | 8.05E-02 | 1.47E-01 |
| A_24_P913620 | 1.81  | 1.13  | 1.02  | 1.46  | 1.32  | 4.73E-02 | 5.90E-01 | 8.79E-01 |
| A_24_P62530  | -1.07 | -1.98 | -1.38 | -1.30 | 1.26  | 4.48E-01 | 8.22E-03 | 3.39E-02 |
| A_23_P79572  | 1.69  | 1.17  | 1.09  | 1.22  | 1.36  | 1.40E-02 | 1.39E-01 | 6.71E-01 |
| A_23_P61406  | -1.38 | -1.56 | -1.02 | -1.16 | -1.38 | 5.04E-02 | 3.13E-02 | 9.06E-01 |
| A_23_P24104  | -1.11 | 1.18  | 1.26  | 1.59  | 1.62  | 2.98E-01 | 1.62E-01 | 1.40E-02 |
| A_23_P302550 | -1.08 | -1.25 | -1.64 | -1.23 | -1.03 | 8.48E-01 | 2.08E-01 | 9.10E-02 |
| A_23_P134601 | -1.11 | -1.51 | -1.10 | -1.32 | -1.47 | 5.30E-01 | 2.54E-02 | 2.88E-01 |
| A_23_P328259 | 1.10  | 1.25  | 1.23  | 1.64  | 1.19  | 3.60E-01 | 1.39E-01 | 1.27E-01 |
| A_23_P377291 | 1.37  | 1.02  | 1.07  | 1.49  | 1.73  | 1.55E-01 | 7.54E-01 | 4.94E-01 |
| A_24_P108779 | -1.23 | -1.31 | -1.30 | -1.12 | -1.23 | 1.14E-02 | 6.18E-03 | 1.92E-02 |
| A_23_P39131  | -1.45 | 1.10  | -1.08 | -1.43 | -1.61 | 4.47E-02 | 1.54E-01 | 2.24E-01 |
| A_24_P686965 | 1.39  | 1.09  | 1.13  | 1.64  | 1.42  | 3.50E-01 | 7.35E-01 | 4.69E-01 |
| A_24_P273599 | -1.32 | -1.33 | -1.02 | -1.24 | -1.36 | 1.21E-01 | 3.61E-02 | 8.74E-01 |
| A_32_P186364 | -1.36 | 1.10  | -1.32 | -1.58 | -1.16 | 6.60E-02 | 3.63E-01 | 3.10E-04 |
| A_32_P199244 | 1.29  | 1.58  | 1.08  | 1.32  | 1.14  | 4.93E-02 | 4.64E-02 | 5.61E-01 |
| A_32_P125945 | -1.00 | 1.45  | -1.02 | 1.35  | 1.49  | 9.88E-01 | 1.38E-02 | 8.59E-01 |
| A_24_P25354  | -1.22 | 1.03  | -1.28 | -1.48 | -1.45 | 1.65E-01 | 7.00E-01 | 5.74E-03 |
| A_32_P98776  | 1.13  | 1.13  | 1.07  | 1.73  | 1.54  | 5.88E-01 | 3.69E-01 | 7.44E-01 |
| A_23_P401055 | -1.27 | -1.50 | 1.11  | -1.50 | -1.35 | 1.19E-01 | 9.95E-02 | 5.88E-01 |
| A_32_P110751 | -1.24 | -1.17 | -1.17 | -1.29 | -1.45 | 1.85E-01 | 1.71E-01 | 8.20E-02 |
| A_32_P4934   | -1.56 | -1.32 | 1.13  | -1.37 | -1.12 | 1.28E-01 | 3.05E-01 | 5.46E-01 |
| A_23_P13683  | 1.25  | 1.17  | 1.05  | 1.33  | 1.46  | 1.10E-01 | 2.23E-01 | 7.03E-01 |
| A_23_P31041  | -1.02 | -1.33 | -1.06 | -1.54 | -1.50 | 8.48E-01 | 9.36E-03 | 3.63E-01 |
| A_32_P218766 | 1.09  | 1.31  | 1.01  | 1.07  | 1.70  | 7.45E-01 | 1.42E-02 | 9.65E-01 |
| A_23_P340722 | 1.38  | 1.12  | 1.09  | 1.47  | 1.60  | 1.19E-01 | 3.44E-01 | 5.01E-01 |
| A_23_P69497  | -1.36 | -1.08 | -1.29 | -1.36 | -1.15 | 1.64E-01 | 5.39E-01 | 3.84E-02 |
| A_23_P37505  | -1.67 | -1.26 | -1.07 | -1.29 | -1.21 | 1.90E-01 | 1.83E-01 | 7.68E-01 |

|              |       |       |       |       |       |          |          |          |
|--------------|-------|-------|-------|-------|-------|----------|----------|----------|
| A_23_P111206 | -1.36 | -1.25 | -1.16 | -1.23 | -1.53 | 7.53E-02 | 1.87E-02 | 2.56E-01 |
| A_23_P14915  | 1.40  | 1.14  | 1.15  | 1.28  | 1.62  | 1.18E-01 | 5.89E-01 | 1.42E-01 |
| A_23_P388200 | -1.01 | -1.09 | -1.28 | -1.33 | -1.43 | 9.39E-01 | 5.51E-01 | 7.39E-02 |
| A_24_P238402 | -1.13 | -1.35 | 1.02  | -1.36 | -1.67 | 4.16E-01 | 1.56E-01 | 8.32E-01 |
| A_23_P360213 | -1.24 | -1.58 | -1.12 | -1.10 | -1.37 | 1.27E-01 | 3.69E-03 | 8.60E-02 |
| A_23_P17095  | -1.03 | -1.08 | -1.05 | -1.64 | -1.62 | 8.42E-01 | 6.62E-01 | 7.52E-01 |
| A_23_P75260  | -1.48 | -1.58 | -1.18 | 1.30  | -1.31 | 8.23E-02 | 1.17E-02 | 8.75E-02 |
| A_32_P55987  | 1.11  | 1.27  | 1.16  | 1.51  | 1.43  | 2.01E-01 | 3.92E-02 | 1.17E-01 |
| A_24_P291278 | 1.06  | 1.69  | 1.02  | 1.30  | 1.49  | 6.98E-01 | 3.34E-02 | 9.01E-01 |
| A_23_P11144  | -1.14 | -1.43 | -1.04 | -1.29 | -1.36 | 3.02E-01 | 1.65E-02 | 7.40E-01 |
| A_24_P101248 | -1.23 | -1.37 | -1.06 | -1.37 | -1.10 | 6.18E-02 | 3.14E-02 | 5.83E-01 |
| A_24_P324084 | 1.74  | 1.09  | -1.01 | 1.35  | 1.59  | 1.17E-01 | 6.41E-01 | 9.42E-01 |
| A_23_P138495 | 1.29  | 1.20  | 1.24  | 1.21  | 1.36  | 1.52E-01 | 2.84E-01 | 4.36E-02 |
| A_23_P201963 | -1.45 | -1.15 | -1.05 | -1.27 | -1.77 | 1.53E-02 | 6.67E-02 | 5.80E-01 |
| A_32_P139505 | 1.17  | 1.16  | 1.01  | 1.49  | 1.45  | 2.20E-01 | 9.43E-02 | 8.90E-01 |
| A_23_P77980  | 1.67  | 1.17  | 1.70  | 1.25  | 1.40  | 1.28E-01 | 1.14E-01 | 7.26E-02 |
| A_24_P194755 | -1.47 | -1.01 | -1.10 | -1.66 | -1.02 | 1.04E-01 | 9.62E-01 | 6.64E-01 |
| A_24_P246841 | -1.25 | -1.26 | -1.16 | -1.39 | -1.36 | 2.63E-01 | 1.77E-01 | 8.46E-02 |
| A_32_P201417 | -1.43 | -1.11 | -1.39 | -1.04 | -1.32 | 1.64E-02 | 3.36E-01 | 5.09E-02 |
| A_23_P50815  | -1.59 | 1.07  | -1.27 | -1.03 | -1.62 | 5.37E-02 | 6.56E-01 | 7.19E-02 |
| A_23_P109950 | -1.28 | -1.03 | -1.20 | -1.11 | -1.89 | 1.32E-01 | 8.95E-01 | 2.25E-01 |
| A_24_P134850 | 1.37  | 1.06  | 1.17  | 1.04  | 1.87  | 2.03E-02 | 6.48E-01 | 3.39E-01 |
| A_23_P169756 | 1.04  | 1.29  | 1.30  | 1.43  | 1.13  | 7.32E-01 | 1.66E-02 | 1.14E-02 |
| A_23_P357207 | 1.04  | -1.74 | -1.10 | -1.28 | -1.20 | 8.18E-01 | 1.11E-02 | 5.95E-01 |
| A_23_P29096  | -1.99 | 1.06  | -1.36 | -1.32 | -1.27 | 7.28E-02 | 7.49E-01 | 1.58E-01 |
| A_23_P167081 | -1.37 | -1.27 | -1.09 | -1.20 | -1.50 | 8.92E-02 | 5.92E-03 | 3.28E-01 |
| A_24_P124875 | 1.47  | 1.15  | 1.22  | 1.15  | 1.77  | 2.04E-01 | 4.56E-01 | 1.83E-01 |
| A_23_P337726 | -1.39 | -1.48 | -1.04 | -1.22 | -1.20 | 4.36E-02 | 2.55E-03 | 6.64E-01 |
| A_23_P43979  | 1.69  | 1.09  | 1.43  | 1.29  | 1.21  | 2.29E-01 | 6.38E-01 | 1.30E-01 |
| A_23_P56369  | 1.47  | 1.21  | 1.12  | 1.24  | 1.61  | 9.75E-02 | 3.20E-01 | 1.54E-01 |
| A_23_P218442 | -1.52 | -1.09 | -1.73 | -1.19 | -1.47 | 2.78E-01 | 5.53E-01 | 5.68E-02 |
| A_23_P38618  | 1.18  | 1.18  | 1.22  | 1.37  | 1.75  | 1.41E-01 | 8.20E-02 | 1.10E-01 |
| A_32_P846696 | -1.18 | -1.16 | -1.13 | -1.06 | -2.55 | 1.19E-01 | 2.26E-01 | 5.05E-01 |
| A_24_P914669 | -1.71 | 1.03  | -1.11 | -1.38 | -1.09 | 1.76E-02 | 8.99E-01 | 3.04E-01 |
| A_23_P96590  | -1.64 | -1.12 | -1.32 | -1.33 | -1.01 | 1.47E-02 | 2.39E-01 | 2.08E-03 |
| A_24_P731648 | 1.28  | 1.01  | 1.45  | 1.28  | 1.25  | 2.40E-01 | 9.11E-01 | 7.75E-04 |
| A_32_P166480 | -1.36 | -1.42 | -1.08 | -1.47 | -1.22 | 1.03E-01 | 1.65E-01 | 2.14E-01 |
| A_23_P427023 | -1.33 | -1.78 | -1.12 | -1.24 | 1.33  | 4.37E-01 | 4.40E-02 | 5.34E-01 |
| A_32_P59678  | -1.13 | -1.41 | -1.18 | -1.21 | -1.23 | 2.51E-01 | 7.57E-03 | 1.04E-01 |
| A_32_P71585  | -1.02 | 1.63  | 1.06  | 1.47  | 1.41  | 7.69E-01 | 6.33E-02 | 6.28E-01 |
| A_23_P431853 | -1.48 | -1.08 | -1.07 | -1.22 | -1.67 | 7.28E-02 | 5.48E-01 | 2.89E-01 |
| A_23_P24004  | -1.35 | -1.37 | 1.03  | -1.33 | -1.44 | 2.60E-02 | 4.90E-02 | 7.68E-01 |
| A_23_P352266 | -1.22 | 1.02  | -1.36 | -1.42 | -1.26 | 1.82E-01 | 8.63E-01 | 4.80E-05 |
| A_23_P258582 | 1.14  | 1.09  | 1.42  | 1.05  | 1.36  | 4.04E-01 | 6.85E-01 | 1.03E-02 |
| A_23_P94501  | -1.07 | -1.23 | -1.06 | -1.82 | -1.58 | 5.71E-01 | 2.29E-01 | 5.29E-01 |
| A_23_P211493 | -1.54 | -1.13 | -1.06 | -1.45 | -1.45 | 8.35E-02 | 1.10E-01 | 6.30E-01 |
| A_32_P184330 | 1.36  | 1.64  | 1.16  | 1.46  | -1.21 | 8.47E-02 | 7.41E-02 | 2.50E-01 |



|              |       |       |       |       |       |          |          |          |
|--------------|-------|-------|-------|-------|-------|----------|----------|----------|
| A_23_P96483  | -1.25 | -1.12 | -1.14 | -1.12 | -1.60 | 2.97E-01 | 4.51E-01 | 3.78E-01 |
| A_23_P35148  | -1.11 | -1.21 | -1.03 | -1.20 | -1.90 | 4.24E-01 | 1.87E-01 | 7.56E-01 |
| A_23_P77389  | 1.28  | 1.19  | 1.16  | 1.59  | 1.13  | 2.44E-01 | 2.47E-01 | 2.94E-02 |
| A_23_P153964 | -1.52 | -1.33 | -1.12 | -1.24 | -1.27 | 1.21E-01 | 1.53E-01 | 3.82E-01 |
| A_24_P221323 | -1.22 | -1.80 | -1.04 | -1.17 | -1.10 | 2.20E-01 | 2.82E-03 | 6.97E-01 |
| A_23_P389250 | 1.34  | -1.28 | 1.11  | 1.40  | 1.79  | 1.37E-01 | 2.16E-01 | 2.50E-01 |
| A_32_P92163  | 1.27  | 1.05  | -1.01 | 1.44  | 1.64  | 1.81E-01 | 8.52E-01 | 9.51E-01 |
| A_24_P384239 | -1.40 | -1.50 | -1.09 | -1.18 | -1.45 | 1.16E-01 | 3.40E-02 | 2.40E-01 |
| A_24_P336931 | -1.42 | -1.62 | -1.01 | -1.40 | -1.02 | 3.93E-02 | 1.82E-02 | 8.51E-01 |
| A_23_P361679 | 1.55  | 1.55  | 1.13  | 1.08  | -1.14 | 1.63E-02 | 5.34E-03 | 2.85E-01 |
| A_23_P92093  | 1.19  | -1.09 | 1.21  | 1.38  | 1.64  | 4.21E-01 | 5.20E-01 | 7.76E-02 |
| A_32_P73452  | 1.34  | -1.13 | 1.10  | 1.49  | 1.64  | 1.01E-01 | 5.81E-01 | 3.28E-01 |
| A_23_P430658 | -1.44 | -1.44 | -1.10 | 1.17  | -1.30 | 2.51E-02 | 3.75E-02 | 5.52E-01 |
| A_24_P23527  | -1.37 | -1.35 | 1.03  | -1.04 | -1.54 | 1.07E-01 | 3.54E-02 | 8.23E-01 |
| A_23_P125423 | -1.46 | -1.48 | -1.15 | -1.47 | 1.44  | 6.24E-02 | 1.68E-04 | 2.58E-02 |
| A_23_P212025 | -1.10 | -1.65 | -1.12 | -1.29 | -1.10 | 3.37E-01 | 1.74E-03 | 1.72E-01 |
| A_24_P155761 | -1.15 | -1.06 | -1.09 | -1.48 | -1.35 | 3.59E-01 | 7.46E-01 | 3.71E-01 |
| A_32_P53212  | 1.33  | -1.24 | -1.21 | -1.43 | -1.67 | 3.66E-01 | 1.58E-01 | 3.69E-01 |
| A_24_P325992 | -1.36 | -1.06 | -1.08 | -1.55 | -1.36 | 1.92E-01 | 6.61E-01 | 2.66E-01 |
| A_24_P218905 | 1.49  | 1.12  | -1.07 | 1.47  | 1.31  | 1.51E-01 | 3.92E-01 | 6.75E-01 |
| A_23_P47704  | -1.47 | -1.30 | -1.05 | -1.27 | -1.52 | 9.48E-02 | 2.19E-02 | 6.16E-01 |
| A_23_P309996 | -1.12 | 1.18  | 1.35  | 1.24  | 1.80  | 3.16E-01 | 8.84E-02 | 2.38E-02 |
| A_24_P203407 | 1.39  | 1.27  | 1.07  | 1.54  | -1.10 | 2.73E-01 | 4.17E-02 | 7.72E-01 |
| A_24_P205008 | 1.03  | 1.27  | 1.04  | 1.58  | 1.47  | 7.57E-01 | 6.09E-02 | 6.28E-01 |
| A_23_P97365  | 1.24  | 1.06  | 1.23  | 1.17  | 1.57  | 5.42E-02 | 6.47E-01 | 1.52E-02 |
| A_24_P208452 | 1.58  | 1.11  | 1.25  | 1.27  | 1.17  | 2.71E-02 | 3.17E-01 | 1.85E-02 |
| A_23_P41765  | -1.42 | -1.26 | -1.00 | 1.01  | -2.16 | 5.63E-02 | 1.08E-01 | 9.79E-01 |
| A_23_P64873  | -1.41 | -1.28 | -1.12 | -1.64 | 1.15  | 3.28E-02 | 5.72E-03 | 1.09E-01 |
| A_23_P163475 | 1.35  | 1.14  | 1.21  | 1.32  | 1.13  | 1.01E-01 | 4.91E-01 | 1.83E-01 |
| A_23_P213562 | -1.15 | -1.20 | 1.02  | -1.66 | -1.33 | 2.28E-01 | 1.35E-01 | 7.80E-01 |
| A_23_P156708 | -1.38 | -1.08 | -1.22 | -1.27 | -1.23 | 2.75E-02 | 5.49E-01 | 5.47E-02 |
| A_23_P365412 | -1.25 | -1.40 | -1.16 | -1.04 | -1.31 | 3.65E-01 | 3.98E-02 | 3.18E-01 |
| A_23_P358531 | 1.30  | 1.19  | 1.21  | 1.34  | 1.30  | 7.34E-02 | 3.66E-02 | 6.02E-03 |
| A_23_P354187 | 1.55  | 1.07  | 1.12  | 1.37  | 1.27  | 4.04E-02 | 5.23E-01 | 1.08E-01 |
| A_24_P922367 | 1.10  | 1.94  | 1.13  | 1.28  | 1.10  | 7.08E-01 | 3.01E-02 | 3.62E-01 |
| A_32_P213661 | -1.22 | -1.67 | -1.04 | -1.39 | -1.30 | 1.91E-01 | 5.46E-02 | 5.73E-01 |
| A_23_P108103 | 1.28  | 1.27  | 1.01  | 1.43  | 1.36  | 3.07E-01 | 1.37E-01 | 9.06E-01 |
| A_32_P189034 | -1.07 | -1.27 | -1.29 | -1.17 | -1.52 | 6.72E-01 | 7.28E-02 | 2.76E-02 |
| A_32_P178724 | -1.01 | 1.24  | 1.33  | 1.31  | 1.15  | 9.57E-01 | 1.13E-01 | 6.58E-02 |
| A_24_P331918 | -1.34 | -1.05 | -1.18 | -1.42 | -1.47 | 2.37E-01 | 7.84E-01 | 2.42E-01 |
| A_23_P152992 | 1.06  | 1.28  | 1.01  | 1.66  | 1.21  | 7.62E-01 | 6.03E-02 | 8.72E-01 |
| A_32_P228331 | -1.14 | -1.16 | -1.11 | -1.30 | -1.37 | 3.58E-01 | 3.74E-01 | 4.83E-01 |
| A_24_P393470 | 1.45  | 1.15  | 1.04  | 1.52  | 1.12  | 5.60E-02 | 1.26E-01 | 5.62E-01 |
| A_23_P127426 | 1.42  | 1.07  | 1.07  | 1.39  | 1.47  | 8.69E-02 | 5.76E-01 | 3.02E-01 |
| A_23_P337934 | -1.21 | 1.21  | 1.49  | 1.54  | 1.16  | 2.48E-01 | 2.95E-02 | 4.62E-05 |
| A_23_P333802 | 1.24  | 1.17  | 1.16  | 1.18  | 1.62  | 1.26E-01 | 1.49E-01 | 1.54E-01 |
| A_23_P20022  | 1.01  | 1.26  | 1.37  | 1.17  | 1.33  | 9.54E-01 | 1.48E-01 | 6.82E-02 |

|              |       |       |       |       |       |          |          |          |
|--------------|-------|-------|-------|-------|-------|----------|----------|----------|
| A_23_P125705 | -1.29 | -1.34 | -1.14 | -1.15 | -1.33 | 9.25E-02 | 4.52E-03 | 1.81E-01 |
| A_32_P51688  | -1.04 | 1.44  | 1.09  | 1.37  | 1.30  | 8.47E-01 | 1.04E-02 | 3.71E-01 |
| A_23_P164691 | -1.46 | -1.32 | -1.05 | -1.06 | -1.46 | 4.08E-02 | 2.61E-02 | 5.14E-01 |
| A_24_P12401  | 1.03  | 1.23  | 1.36  | 1.21  | 1.22  | 8.98E-01 | 9.34E-02 | 3.61E-02 |
| A_32_P232523 | 1.21  | 1.20  | 1.31  | 1.16  | 1.25  | 1.26E-01 | 2.03E-01 | 1.34E-03 |
| A_24_P193011 | -1.54 | -1.22 | -1.27 | -1.20 | -1.23 | 5.22E-02 | 3.16E-03 | 3.69E-03 |
| A_23_P422831 | -1.34 | -1.13 | -1.45 | -1.26 | 1.02  | 7.01E-02 | 1.40E-01 | 4.23E-04 |
| A_24_P342226 | 1.17  | 1.08  | 1.19  | 1.61  | 1.03  | 5.45E-01 | 6.79E-01 | 3.22E-01 |
| A_23_P85008  | -1.08 | -1.16 | -1.13 | -1.59 | -1.11 | 6.31E-01 | 3.03E-01 | 5.08E-01 |
| A_32_P26738  | -1.34 | -1.21 | -1.06 | -1.28 | -1.45 | 1.14E-01 | 8.00E-02 | 5.17E-01 |
| A_24_P867702 | -1.15 | 1.38  | 1.09  | 1.26  | 1.52  | 6.60E-01 | 2.01E-01 | 6.58E-01 |
| A_23_P26890  | -1.34 | -1.06 | -1.47 | -1.18 | -1.22 | 4.21E-02 | 4.29E-01 | 4.35E-04 |
| A_23_P416314 | 1.71  | 1.12  | 1.03  | 1.26  | 1.27  | 1.39E-02 | 4.86E-01 | 7.31E-01 |
| A_32_P224302 | -1.24 | -1.19 | -1.67 | -1.31 | -1.18 | 1.27E-01 | 2.28E-02 | 8.67E-03 |
| A_23_P141730 | -1.34 | -1.35 | 1.01  | -1.55 | -1.11 | 1.04E-01 | 2.26E-01 | 9.45E-01 |
| A_32_P221799 | 1.18  | -1.24 | -1.03 | -1.54 | -1.70 | 4.81E-01 | 1.02E-01 | 7.52E-01 |
| A_24_P279489 | 1.24  | 1.08  | 1.10  | 1.21  | 1.86  | 6.02E-02 | 5.66E-01 | 4.71E-01 |
| A_23_P247    | -1.16 | -1.36 | -1.27 | -1.01 | 1.24  | 6.99E-01 | 3.53E-02 | 1.63E-01 |
| A_23_P2904   | 1.46  | 1.26  | 1.03  | 1.16  | 1.55  | 1.89E-01 | 1.70E-01 | 8.63E-01 |
| A_23_P322562 | -1.48 | -1.05 | -1.27 | -1.10 | -1.31 | 4.75E-02 | 8.56E-01 | 1.36E-01 |
| A_23_P82065  | 1.38  | -1.13 | 1.16  | 1.26  | 1.53  | 1.89E-02 | 5.03E-01 | 2.70E-01 |
| A_24_P35935  | -1.13 | -1.33 | -1.05 | -1.35 | -1.41 | 4.22E-01 | 2.27E-03 | 3.99E-01 |
| A_23_P330209 | 1.49  | 1.00  | 1.10  | 1.44  | 1.35  | 1.74E-01 | 9.67E-01 | 5.95E-01 |
| A_24_P281853 | -1.35 | -1.05 | -1.14 | -1.17 | -1.85 | 2.49E-01 | 7.25E-01 | 2.05E-01 |
| A_24_P713185 | -1.38 | -1.42 | -1.16 | -1.10 | -1.41 | 1.41E-01 | 3.53E-02 | 1.18E-01 |
| A_23_P352535 | -1.26 | -1.44 | -1.08 | -1.03 | -1.49 | 1.18E-01 | 2.40E-02 | 4.45E-01 |
| A_23_P26367  | 1.23  | -1.00 | 1.43  | 1.44  | 1.52  | 3.58E-01 | 9.86E-01 | 1.42E-01 |
| A_24_P911788 | -1.77 | -1.25 | -1.18 | -1.19 | -1.02 | 9.67E-02 | 9.90E-02 | 3.64E-01 |
| A_23_P16648  | 1.08  | 1.25  | 1.23  | 1.12  | 1.89  | 5.42E-01 | 1.68E-01 | 1.57E-01 |
| A_23_P428260 | -1.11 | -1.04 | -1.13 | -1.79 | -1.25 | 4.96E-01 | 4.34E-01 | 1.11E-01 |
| A_23_P206212 | -1.57 | -1.16 | -1.18 | -1.29 | -1.92 | 1.38E-01 | 3.30E-02 | 3.16E-01 |
| A_24_P393740 | -1.38 | -1.39 | 1.19  | -1.28 | -1.32 | 3.17E-01 | 8.16E-02 | 4.41E-01 |
| A_32_P49764  | -1.10 | -1.43 | -1.22 | -1.36 | -1.39 | 3.81E-01 | 5.64E-02 | 8.08E-02 |
| A_24_P896765 | -1.24 | -1.35 | -1.33 | -1.29 | 1.25  | 3.26E-01 | 3.04E-01 | 1.01E-01 |
| A_23_P211326 | -1.06 | 1.33  | 1.65  | 1.09  | 1.28  | 6.95E-01 | 8.19E-02 | 1.72E-03 |
| A_24_P348513 | 1.05  | 2.15  | 1.33  | 1.27  | 1.05  | 7.62E-01 | 3.21E-02 | 8.12E-02 |
| A_23_P218928 | -1.18 | -1.20 | 1.03  | -1.55 | -1.31 | 4.71E-01 | 3.03E-01 | 7.77E-01 |
| A_23_P114947 | -1.15 | -1.09 | -1.12 | -1.60 | -1.64 | 8.17E-02 | 2.37E-01 | 1.38E-01 |
| A_24_P376483 | -1.20 | -1.09 | -1.09 | -1.24 | -1.81 | 1.24E-01 | 3.58E-01 | 4.00E-01 |
| A_23_P251984 | 1.24  | -1.03 | 1.16  | 1.12  | 3.74  | 1.31E-02 | 6.38E-01 | 6.74E-03 |
| A_24_P482017 | 1.02  | 1.24  | 1.06  | 1.50  | 1.59  | 8.92E-01 | 1.77E-01 | 5.27E-01 |
| A_24_P357572 | 1.10  | -1.51 | -1.29 | -1.08 | -1.28 | 6.30E-01 | 8.51E-03 | 2.09E-01 |
| A_23_P130429 | -1.09 | -1.29 | 1.04  | -1.65 | -1.48 | 4.34E-01 | 3.04E-01 | 7.17E-01 |
| A_24_P705167 | 1.10  | 1.23  | -1.00 | 1.50  | 1.34  | 8.25E-01 | 1.74E-01 | 9.99E-01 |
| A_23_P156907 | -1.06 | -1.28 | -1.03 | -1.35 | -1.51 | 7.59E-01 | 1.99E-01 | 8.12E-01 |
| A_24_P411561 | -1.09 | -1.68 | -1.34 | -1.03 | -1.28 | 7.84E-01 | 1.13E-01 | 1.24E-01 |
| A_23_P310911 | 1.60  | 1.02  | 1.14  | 1.19  | 1.59  | 1.31E-01 | 9.11E-01 | 3.73E-01 |

|              |       |       |       |       |       |          |          |          |
|--------------|-------|-------|-------|-------|-------|----------|----------|----------|
| A_23_P206441 | 1.43  | -1.23 | 1.11  | 1.45  | 1.28  | 1.06E-01 | 4.14E-01 | 2.81E-01 |
| A_32_P111019 | 1.23  | 1.06  | 1.19  | 1.14  | 1.57  | 3.15E-01 | 7.44E-01 | 7.69E-02 |
| A_32_P47643  | 1.10  | 1.26  | 1.27  | 1.18  | 1.21  | 3.95E-01 | 9.21E-02 | 2.05E-04 |
| A_23_P344281 | -1.25 | -1.21 | -1.30 | 1.01  | -1.56 | 2.29E-02 | 5.86E-02 | 1.30E-01 |
| A_23_P148047 | -1.27 | -1.19 | -1.10 | -1.30 | -1.58 | 6.02E-02 | 1.50E-01 | 2.64E-01 |
| A_24_P91094  | 1.40  | -1.09 | 1.22  | 1.53  | 1.22  | 2.61E-01 | 6.42E-01 | 2.40E-01 |
| A_23_P118095 | 1.18  | 1.40  | 1.30  | 1.16  | 1.11  | 2.38E-01 | 4.27E-02 | 8.73E-02 |
| A_23_P32805  | -1.52 | -1.03 | 1.03  | -1.24 | -1.33 | 3.64E-02 | 8.91E-01 | 9.07E-01 |
| A_24_P919850 | 1.56  | 1.03  | 1.03  | 1.57  | 1.11  | 1.55E-02 | 8.34E-01 | 7.47E-01 |
| A_24_P68908  | 1.26  | -1.04 | 1.17  | 1.22  | 1.56  | 1.67E-01 | 8.89E-01 | 1.30E-01 |
| A_24_P200761 | -1.10 | -1.27 | -1.35 | -1.04 | -1.67 | 4.22E-01 | 2.80E-01 | 1.47E-01 |
| A_23_P114713 | -1.09 | -1.25 | -1.35 | -1.13 | 1.03  | 5.58E-01 | 2.91E-01 | 3.58E-03 |
| A_23_P11032  | -1.52 | -1.42 | 1.06  | -1.19 | -1.22 | 1.89E-02 | 1.28E-02 | 4.76E-01 |
| A_24_P188071 | 1.04  | -1.06 | 1.15  | 1.55  | 1.41  | 7.68E-01 | 7.90E-01 | 9.04E-02 |
| A_32_P21807  | -1.18 | -1.37 | -1.23 | -1.05 | -1.17 | 2.03E-01 | 1.98E-02 | 1.02E-01 |
| A_23_P425066 | 1.18  | 1.15  | 1.09  | 1.02  | 2.10  | 2.75E-01 | 2.78E-01 | 2.32E-01 |
| A_23_P153320 | -1.04 | -1.62 | -1.29 | -1.16 | -1.33 | 7.80E-01 | 4.91E-02 | 8.09E-02 |
| A_23_P111724 | -1.16 | -1.38 | -1.48 | -1.08 | 1.25  | 4.04E-01 | 2.98E-02 | 1.10E-02 |
| A_32_P162183 | -1.09 | -1.08 | -1.13 | -1.48 | -1.23 | 6.77E-01 | 5.37E-01 | 3.28E-01 |
| A_23_P211973 | -1.08 | -1.41 | -1.18 | -1.48 | 1.08  | 5.77E-01 | 1.55E-03 | 1.84E-01 |
| A_23_P410159 | 1.41  | 1.23  | 1.01  | 1.38  | 1.09  | 4.81E-03 | 1.60E-01 | 9.63E-01 |
| A_32_P147678 | 1.26  | 1.11  | -1.03 | 1.38  | 1.66  | 1.93E-01 | 2.56E-01 | 6.37E-01 |
| A_23_P119006 | 1.31  | -1.03 | 1.17  | 1.17  | 1.79  | 1.15E-01 | 8.62E-01 | 3.91E-01 |
| A_23_P108948 | 1.31  | 1.12  | 1.06  | 1.28  | 1.69  | 6.66E-02 | 1.27E-01 | 4.77E-01 |
| A_32_P188921 | 1.26  | 1.34  | -1.03 | 1.34  | 1.31  | 4.09E-01 | 2.08E-02 | 8.23E-01 |
| A_24_P346762 | 1.70  | 1.09  | -1.02 | 1.33  | 1.34  | 3.07E-02 | 2.43E-01 | 9.24E-01 |
| A_23_P420442 | 1.49  | 1.22  | 1.35  | -1.13 | 1.23  | 7.11E-03 | 4.48E-02 | 2.84E-02 |
| A_23_P344694 | 1.22  | 1.21  | 1.28  | 1.23  | 1.17  | 4.84E-01 | 2.59E-01 | 2.02E-01 |
| A_24_P334640 | 1.25  | 1.30  | 1.22  | -1.10 | 1.58  | 1.99E-01 | 1.59E-01 | 8.84E-02 |
| A_24_P230570 | -1.60 | 1.05  | -1.12 | -1.10 | -1.53 | 6.56E-02 | 8.20E-01 | 3.68E-01 |
| A_23_P58676  | 1.33  | 1.20  | -1.09 | 1.21  | 1.83  | 2.19E-02 | 2.18E-01 | 5.43E-01 |
| A_23_P88095  | -1.08 | -1.62 | -1.05 | -1.19 | -1.27 | 1.32E-01 | 2.24E-04 | 3.52E-01 |
| A_32_P209208 | -1.22 | -1.46 | 1.01  | -1.63 | -1.04 | 1.17E-01 | 9.01E-02 | 9.57E-01 |
| A_23_P30813  | 1.60  | 1.33  | 1.32  | 1.08  | -1.07 | 8.54E-02 | 5.67E-02 | 2.21E-02 |
| A_24_P163168 | -1.58 | 1.05  | -1.28 | -1.18 | -1.37 | 2.30E-02 | 4.94E-01 | 2.27E-02 |
| A_24_P178723 | 1.48  | 1.19  | -1.01 | 1.33  | 1.35  | 1.39E-01 | 4.19E-01 | 9.74E-01 |
| A_23_P29922  | -1.23 | -1.52 | -1.06 | -1.17 | -1.25 | 1.85E-03 | 5.23E-03 | 3.68E-01 |
| A_24_P387514 | 1.05  | 1.22  | 1.23  | 1.47  | 1.10  | 7.48E-01 | 1.99E-01 | 2.05E-01 |
| A_24_P137602 | -1.14 | -1.08 | -1.17 | -1.67 | -1.27 | 3.69E-01 | 7.44E-01 | 1.07E-01 |
| A_23_P9677   | -1.14 | 1.22  | 1.37  | 1.42  | 1.07  | 6.01E-01 | 3.70E-01 | 9.90E-02 |
| A_32_P135113 | 1.03  | 1.28  | -1.07 | 1.35  | 1.78  | 9.03E-01 | 7.48E-02 | 6.99E-01 |
| A_24_P392622 | 1.83  | -1.05 | 1.12  | 1.45  | 1.33  | 6.78E-02 | 7.24E-01 | 2.44E-01 |
| A_23_P214080 | -1.37 | -1.25 | -1.20 | 1.07  | -1.69 | 2.80E-02 | 2.70E-02 | 1.14E-01 |
| A_32_P197340 | -1.24 | -1.24 | -1.18 | -1.48 | 1.22  | 1.53E-01 | 2.63E-01 | 2.13E-01 |
| A_23_P393080 | 1.33  | 1.18  | 1.28  | 1.43  | -1.15 | 2.28E-01 | 8.19E-02 | 8.37E-02 |
| A_23_P59261  | 1.40  | 1.00  | 1.52  | 1.31  | 1.02  | 3.73E-02 | 9.92E-01 | 2.39E-07 |
| A_23_P152620 | -1.10 | -1.19 | -1.35 | -1.23 | -1.31 | 4.98E-01 | 2.04E-01 | 5.52E-02 |

|              |       |       |       |       |       |          |          |          |
|--------------|-------|-------|-------|-------|-------|----------|----------|----------|
| A_24_P169092 | -1.15 | -1.39 | -1.22 | -1.13 | -1.42 | 2.50E-01 | 5.45E-02 | 2.67E-01 |
| A_23_P207939 | -1.53 | -1.47 | -1.06 | -1.17 | -1.37 | 1.26E-01 | 1.08E-01 | 6.44E-01 |
| A_24_P226278 | -1.49 | -1.36 | -1.11 | -1.08 | -1.15 | 2.28E-02 | 4.21E-02 | 3.66E-01 |
| A_23_P26965  | -1.16 | 1.10  | -1.33 | -1.56 | -1.15 | 4.56E-01 | 6.26E-01 | 1.90E-02 |
| A_23_P340148 | 1.04  | -1.61 | -1.36 | -1.36 | -1.11 | 8.48E-01 | 6.69E-02 | 1.03E-01 |
| A_23_P76658  | -1.23 | -1.51 | -1.06 | -1.18 | -1.14 | 4.94E-02 | 2.06E-04 | 4.49E-01 |
| A_23_P42116  | 1.76  | -1.01 | 1.05  | 1.04  | 1.65  | 7.02E-03 | 9.18E-01 | 4.84E-01 |
| A_24_P255965 | 1.15  | 1.06  | -1.02 | 1.39  | 1.72  | 4.15E-01 | 5.69E-01 | 8.50E-01 |
| A_23_P334328 | -1.07 | -1.11 | -1.33 | -1.02 | -1.41 | 6.51E-01 | 4.53E-01 | 6.23E-04 |
| A_23_P215778 | 1.11  | 1.37  | 1.16  | 1.15  | 1.49  | 4.67E-01 | 3.90E-01 | 3.69E-01 |
| A_23_P121869 | -1.27 | -1.18 | 1.06  | -1.01 | -2.52 | 2.23E-02 | 2.95E-02 | 5.47E-01 |
| A_23_P78405  | 1.20  | 1.20  | 1.12  | -1.04 | 2.22  | 2.35E-01 | 2.37E-01 | 5.99E-01 |
| A_23_P131435 | -1.02 | -1.32 | -1.15 | -1.39 | -1.36 | 7.56E-01 | 4.64E-02 | 1.17E-01 |
| A_24_P910833 | 1.28  | 1.19  | 1.04  | 1.43  | 1.30  | 2.24E-01 | 1.18E-01 | 6.74E-01 |
| A_24_P302506 | -1.28 | -1.20 | -1.40 | -1.18 | -1.19 | 1.91E-01 | 1.03E-01 | 6.13E-02 |
| A_23_P38537  | 1.10  | 1.24  | 1.15  | 1.48  | 1.19  | 8.17E-01 | 1.97E-01 | 4.40E-01 |
| A_23_P347027 | 1.35  | 1.16  | 1.27  | 1.36  | 1.01  | 3.09E-01 | 2.06E-01 | 1.17E-01 |
| A_32_P387648 | 1.36  | -1.22 | 1.15  | 1.33  | 1.74  | 1.85E-01 | 4.03E-01 | 2.13E-01 |
| A_24_P367752 | 1.24  | 1.11  | 1.25  | 1.27  | 1.31  | 1.73E-01 | 4.86E-01 | 8.67E-02 |
| A_23_P129188 | 1.22  | 1.25  | 1.04  | 1.18  | 1.61  | 1.09E-01 | 7.17E-02 | 5.97E-01 |
| A_32_P54616  | -1.06 | -1.35 | -1.09 | -1.23 | -1.38 | 7.56E-01 | 7.25E-03 | 2.63E-01 |
| A_23_P77697  | 1.21  | 1.31  | 1.08  | -1.23 | 1.44  | 3.13E-01 | 1.71E-01 | 7.58E-01 |
| A_32_P150086 | 1.04  | -1.14 | -1.34 | -1.48 | 1.34  | 8.99E-01 | 7.41E-01 | 1.28E-04 |
| A_24_P123616 | -1.21 | -1.14 | -1.01 | -1.32 | -1.77 | 7.14E-02 | 1.22E-01 | 8.78E-01 |
| A_23_P170233 | 1.35  | -1.19 | 1.29  | 1.43  | 1.27  | 6.31E-02 | 2.03E-01 | 2.38E-03 |
| A_23_P150789 | 1.38  | 1.43  | 1.19  | -1.19 | 1.43  | 3.48E-02 | 1.09E-02 | 6.23E-02 |
| A_23_P9280   | -1.26 | -1.22 | -1.13 | -1.54 | -1.13 | 9.60E-02 | 7.50E-03 | 8.28E-02 |
| A_23_P328545 | -1.39 | 1.34  | 1.06  | -1.01 | 1.05  | 4.05E-01 | 3.04E-02 | 8.14E-01 |
| A_24_P535380 | 1.06  | 1.36  | 1.33  | 1.37  | 1.08  | 6.71E-01 | 9.16E-02 | 5.54E-02 |
| A_23_P319153 | 1.10  | -1.01 | 1.06  | 1.40  | 1.60  | 5.66E-01 | 9.61E-01 | 7.33E-01 |
| A_32_P32835  | 1.34  | 1.10  | 1.25  | 1.26  | 1.16  | 2.92E-01 | 5.50E-01 | 2.29E-02 |
| A_23_P35597  | -1.05 | -1.36 | -1.02 | -1.45 | -1.25 | 8.46E-01 | 4.98E-02 | 8.84E-01 |
| A_23_P53126  | -1.19 | -1.22 | -1.06 | -1.31 | -1.33 | 2.42E-01 | 4.11E-02 | 5.13E-01 |
| A_24_P419017 | 1.07  | 1.51  | 1.14  | 1.56  | 1.08  | 7.20E-01 | 4.37E-02 | 1.73E-01 |
| A_23_P29551  | 1.39  | 1.04  | 1.08  | 1.46  | 1.21  | 1.08E-01 | 7.44E-01 | 1.71E-01 |
| A_23_P340848 | -1.31 | -1.92 | -1.18 | -1.12 | 1.03  | 2.36E-01 | 2.28E-02 | 1.81E-01 |
| A_24_P38815  | 1.55  | 1.33  | 1.09  | -1.05 | 1.50  | 1.22E-02 | 8.05E-02 | 2.23E-01 |
| A_23_P114349 | 1.43  | 1.00  | -1.04 | 1.36  | 1.61  | 6.87E-02 | 9.82E-01 | 7.63E-01 |
| A_32_P234691 | -1.43 | -1.05 | -1.23 | -1.14 | -1.47 | 4.02E-02 | 6.85E-01 | 3.99E-02 |
| A_32_P155645 | -1.12 | -1.46 | -1.11 | -1.44 | -1.07 | 4.16E-01 | 1.71E-02 | 2.21E-01 |
| A_23_P168651 | -1.19 | -1.00 | -1.21 | -1.29 | -1.52 | 2.48E-01 | 9.93E-01 | 5.28E-02 |
| A_23_P100730 | -1.46 | -1.27 | -1.09 | 1.01  | -1.26 | 4.58E-02 | 6.71E-02 | 5.52E-01 |
| A_24_P569791 | 1.33  | 1.35  | -1.18 | 1.25  | 1.48  | 2.46E-01 | 9.10E-02 | 3.67E-01 |
| A_24_P220771 | -1.27 | -1.09 | -1.10 | -1.29 | -1.34 | 3.66E-01 | 5.91E-01 | 5.48E-01 |
| A_23_P2674   | 1.10  | 1.16  | 1.54  | 1.03  | 1.29  | 7.07E-01 | 4.42E-01 | 1.25E-01 |
| A_24_P289178 | 1.28  | 1.35  | 1.42  | -1.02 | 1.14  | 2.26E-01 | 7.85E-02 | 3.01E-04 |
| A_23_P152791 | 1.16  | -1.04 | 1.45  | 1.42  | -1.02 | 5.61E-01 | 8.22E-01 | 1.32E-03 |

|              |       |       |       |       |       |          |          |          |
|--------------|-------|-------|-------|-------|-------|----------|----------|----------|
| A_23_P210100 | -1.46 | -1.21 | -1.31 | -1.17 | 1.29  | 6.89E-03 | 3.06E-02 | 1.98E-03 |
| A_24_P156049 | 1.85  | 1.17  | 1.21  | -1.09 | 1.21  | 5.80E-03 | 1.21E-01 | 6.28E-02 |
| A_24_P375962 | -1.00 | -1.27 | -1.16 | -1.32 | 1.04  | 9.93E-01 | 3.33E-02 | 3.99E-01 |
| A_23_P410613 | -1.04 | -1.18 | -1.02 | -1.75 | -1.26 | 7.57E-01 | 5.84E-02 | 8.33E-01 |
| A_23_P16944  | 1.05  | 1.29  | 1.02  | 1.37  | 1.44  | 7.07E-01 | 8.54E-02 | 7.65E-01 |
| A_24_P265051 | -1.28 | -1.41 | -1.27 | -1.06 | -1.01 | 3.39E-01 | 3.69E-02 | 1.80E-01 |
| A_24_P98109  | -1.08 | -1.48 | -1.03 | -1.23 | -1.12 | 7.26E-01 | 1.06E-02 | 8.33E-01 |
| A_32_P9924   | 1.10  | 1.09  | 1.43  | 1.26  | 1.18  | 3.52E-01 | 3.54E-01 | 3.50E-05 |
| A_32_P22679  | 1.02  | 1.40  | 1.20  | 1.49  | 1.24  | 8.73E-01 | 3.95E-02 | 8.57E-02 |
| A_23_P161209 | -1.39 | -1.19 | -1.27 | 1.10  | -1.49 | 3.95E-02 | 4.69E-03 | 3.74E-02 |
| A_24_P937319 | 1.10  | 1.09  | 1.05  | 1.44  | 1.58  | 4.80E-01 | 4.52E-01 | 6.04E-01 |
| A_23_P44088  | -1.09 | 1.33  | 1.21  | 1.36  | 1.53  | 3.83E-01 | 6.58E-02 | 1.56E-01 |
| A_23_P166100 | -1.40 | -1.09 | -1.16 | -1.22 | -1.34 | 5.09E-03 | 2.04E-01 | 6.93E-04 |
| A_23_P44674  | -1.49 | -1.31 | -1.17 | -1.18 | 1.04  | 3.37E-02 | 7.48E-03 | 6.36E-02 |
| A_23_P33511  | -1.20 | -1.76 | 1.02  | 1.01  | -1.47 | 5.56E-02 | 9.76E-03 | 6.96E-01 |
| A_32_P215556 | -1.09 | -1.49 | -1.06 | -1.53 | 1.01  | 7.55E-01 | 2.52E-01 | 7.20E-01 |
| A_23_P170579 | -1.13 | 1.21  | 1.28  | 1.31  | 1.73  | 4.44E-01 | 2.00E-01 | 2.05E-01 |
| A_23_P11874  | 1.30  | 1.65  | 1.15  | 1.65  | 1.11  | 1.43E-01 | 1.29E-01 | 1.31E-01 |
| A_32_P171793 | -1.37 | -1.31 | -1.09 | -1.22 | -1.17 | 3.25E-02 | 9.25E-03 | 2.27E-01 |
| A_32_P128368 | 1.13  | 1.21  | 1.10  | 1.20  | 1.42  | 5.77E-01 | 3.24E-01 | 5.93E-01 |
| A_24_P170726 | 1.17  | 1.06  | 1.05  | 1.89  | 1.41  | 2.69E-01 | 7.48E-01 | 7.24E-01 |
| A_23_P366125 | 1.17  | -1.04 | 1.15  | 1.58  | 1.25  | 2.89E-01 | 7.63E-01 | 1.65E-01 |
| A_23_P390097 | 1.37  | 1.03  | 1.09  | 1.50  | 1.26  | 4.15E-02 | 6.28E-01 | 2.97E-01 |
| A_24_P357688 | -1.12 | -1.37 | 1.00  | -1.42 | -1.40 | 5.95E-01 | 1.49E-01 | 9.75E-01 |
| A_24_P918527 | -1.10 | -1.23 | 1.02  | -1.65 | -1.27 | 2.96E-01 | 1.42E-01 | 8.23E-01 |
| A_32_P73535  | -1.38 | -1.36 | -1.64 | -1.05 | 1.34  | 1.36E-02 | 4.82E-03 | 1.08E-02 |
| A_23_P145024 | -1.16 | -1.29 | -1.21 | -1.09 | -1.21 | 3.97E-01 | 1.44E-02 | 1.53E-02 |
| A_24_P392146 | 1.27  | 1.17  | 1.06  | 1.35  | 1.32  | 4.21E-02 | 2.22E-01 | 3.35E-01 |
| A_24_P822704 | 1.15  | 1.24  | 1.30  | 1.23  | 1.09  | 4.93E-01 | 1.76E-01 | 1.81E-01 |
| A_32_P101420 | 1.15  | -1.05 | 1.12  | 1.46  | 1.62  | 4.37E-01 | 7.19E-01 | 2.91E-01 |
| A_32_P416161 | 1.33  | -1.07 | 1.13  | 1.27  | 1.84  | 2.18E-01 | 7.50E-01 | 2.86E-01 |
| A_23_P110430 | 1.02  | -1.41 | -1.18 | -1.25 | 1.15  | 9.54E-01 | 7.80E-02 | 3.10E-01 |
| A_23_P48513  | 1.20  | -1.05 | 1.40  | 1.54  | -1.33 | 3.37E-01 | 8.36E-01 | 2.08E-02 |
| A_23_P208389 | -1.21 | -1.08 | 1.04  | -1.42 | -1.54 | 1.05E-01 | 3.85E-01 | 6.06E-01 |
| A_32_P142128 | -1.11 | 1.21  | 1.32  | 1.73  | 1.05  | 4.64E-01 | 1.17E-01 | 1.63E-02 |
| A_23_P345118 | 1.25  | 1.35  | 1.05  | 1.51  | -1.13 | 2.62E-01 | 2.85E-02 | 4.56E-01 |
| A_32_P72394  | 1.11  | 1.19  | 1.04  | 1.48  | 1.34  | 4.33E-01 | 2.65E-01 | 6.91E-01 |
| A_23_P69154  | -1.11 | 1.04  | -1.13 | -1.26 | -1.92 | 5.81E-01 | 8.31E-01 | 4.29E-01 |
| A_23_P215944 | 1.38  | 1.03  | 1.12  | 1.13  | 3.04  | 3.57E-02 | 8.04E-01 | 1.64E-01 |
| A_23_P56578  | -1.40 | -1.14 | -1.02 | -1.45 | -1.41 | 1.83E-01 | 6.52E-01 | 8.58E-01 |
| A_24_P399888 | 1.76  | -1.06 | 1.23  | 1.41  | 1.04  | 7.50E-02 | 7.47E-01 | 1.59E-01 |
| A_23_P121533 | 1.14  | 1.27  | 1.17  | 1.31  | -1.10 | 1.01E-01 | 4.31E-03 | 1.85E-01 |
| A_24_P404628 | -1.22 | -1.39 | 1.01  | -1.43 | -1.14 | 2.20E-01 | 2.22E-02 | 9.00E-01 |
| A_24_P238666 | 1.26  | 1.37  | -1.05 | 1.11  | 1.55  | 1.31E-01 | 1.40E-02 | 6.63E-01 |
| A_24_P406006 | 1.16  | 1.20  | 1.08  | 1.01  | 2.18  | 5.74E-01 | 8.92E-02 | 7.29E-01 |
| A_23_P142756 | -1.41 | -1.02 | -1.08 | -1.27 | -1.31 | 6.43E-02 | 9.18E-01 | 6.71E-01 |
| A_23_P360777 | -1.31 | -1.15 | -1.18 | -1.55 | 1.18  | 1.02E-01 | 3.07E-01 | 3.06E-02 |

|              |       |       |       |       |       |          |          |          |
|--------------|-------|-------|-------|-------|-------|----------|----------|----------|
| A_32_P113472 | 1.62  | 1.02  | 1.28  | 1.25  | -1.02 | 1.84E-02 | 8.84E-01 | 3.58E-02 |
| A_23_P254165 | -1.38 | -1.35 | -1.24 | -1.37 | 1.32  | 1.44E-01 | 1.81E-02 | 3.54E-02 |
| A_24_P933940 | -1.07 | 1.30  | 1.10  | 1.08  | 1.88  | 7.20E-01 | 7.04E-03 | 5.23E-01 |
| A_23_P91430  | 1.30  | 1.10  | 1.24  | 1.43  | -1.03 | 2.19E-01 | 3.91E-01 | 6.96E-02 |
| A_23_P717    | 1.31  | 1.13  | 1.25  | 1.24  | 1.35  | 1.53E-01 | 2.15E-01 | 9.49E-02 |
| A_23_P47426  | 1.21  | 1.25  | 1.10  | -1.01 | 1.58  | 2.83E-01 | 5.31E-03 | 4.46E-01 |
| A_32_P165297 | -1.33 | -1.29 | -1.18 | -1.00 | -1.42 | 4.46E-02 | 2.42E-01 | 3.19E-02 |
| A_24_P350196 | -1.18 | -1.28 | -1.01 | -1.35 | -1.24 | 1.21E-01 | 2.93E-02 | 9.29E-01 |
| A_24_P46417  | 1.25  | 1.04  | 1.07  | 1.18  | 1.97  | 2.30E-01 | 5.79E-01 | 3.99E-01 |
| A_23_P19754  | 1.26  | 1.04  | 1.25  | 1.43  | 1.53  | 2.89E-01 | 5.84E-01 | 1.47E-01 |
| A_32_P191120 | 1.22  | 1.31  | 1.23  | 1.01  | 1.37  | 1.52E-01 | 6.47E-02 | 2.17E-01 |
| A_32_P90709  | -1.21 | -1.15 | -1.24 | -1.39 | 1.10  | 2.37E-01 | 4.76E-01 | 4.07E-02 |
| A_24_P90097  | -1.23 | -1.11 | -1.02 | -1.78 | -1.11 | 9.92E-02 | 2.54E-01 | 8.29E-01 |
| A_23_P217379 | 1.08  | 1.07  | 1.18  | 1.71  | 1.17  | 4.30E-01 | 2.11E-01 | 2.11E-02 |
| A_24_P251962 | -1.35 | -1.01 | -1.39 | -1.25 | -1.33 | 1.16E-01 | 9.57E-01 | 4.71E-02 |
| A_23_P76480  | -1.13 | -1.51 | -1.11 | -1.08 | -1.28 | 2.32E-01 | 2.87E-03 | 1.52E-01 |
| A_24_P231057 | -1.05 | -1.22 | -1.04 | -1.58 | -1.21 | 7.39E-01 | 8.45E-02 | 7.24E-01 |
| A_23_P39898  | 1.17  | -1.12 | 1.38  | 1.05  | 1.09  | 3.35E-01 | 7.59E-01 | 2.30E-02 |
| A_24_P305933 | -1.02 | 1.24  | 1.07  | 1.23  | 1.85  | 8.47E-01 | 2.01E-02 | 3.68E-01 |
| A_32_P150632 | -1.46 | -1.36 | -1.22 | -1.31 | 1.25  | 6.49E-02 | 1.88E-02 | 2.00E-01 |
| A_23_P382835 | -1.19 | -1.17 | -1.03 | -1.43 | -1.29 | 1.83E-01 | 4.09E-01 | 7.04E-01 |
| A_24_P944751 | 1.20  | 1.24  | 1.28  | -1.01 | 1.44  | 1.03E-01 | 2.04E-02 | 1.12E-02 |
| A_24_P282083 | -1.09 | 1.36  | 1.25  | 1.39  | 1.23  | 5.99E-01 | 5.23E-02 | 1.08E-01 |
| A_24_P354451 | 1.28  | -1.04 | 1.29  | 1.46  | 1.12  | 1.08E-01 | 6.39E-01 | 3.17E-03 |
| A_23_P130466 | 1.05  | 1.45  | 1.04  | 1.22  | 1.40  | 5.39E-01 | 5.31E-03 | 5.81E-01 |
| A_24_P783679 | -1.01 | -1.31 | -1.02 | -1.55 | -1.47 | 9.69E-01 | 1.46E-01 | 7.70E-01 |
| A_23_P319640 | 1.08  | 1.41  | 1.11  | 1.09  | 1.39  | 5.55E-01 | 1.26E-03 | 4.40E-01 |
| A_24_P418408 | 1.28  | 1.17  | 1.04  | 1.35  | 1.36  | 9.21E-02 | 7.15E-02 | 5.52E-01 |
| A_24_P338788 | 1.79  | 1.01  | 1.00  | 1.35  | 1.46  | 6.39E-02 | 8.91E-01 | 9.73E-01 |
| A_23_P59358  | -1.04 | -1.41 | -1.10 | -1.29 | -1.32 | 4.99E-01 | 1.54E-03 | 1.59E-01 |
| A_23_P103511 | -1.22 | -1.16 | -1.26 | 1.05  | -1.63 | 2.52E-01 | 1.46E-02 | 8.08E-03 |
| A_23_P204937 | -1.03 | -1.23 | -1.01 | -1.40 | -1.58 | 8.10E-01 | 6.16E-02 | 9.23E-01 |
| A_24_P76759  | 1.35  | 1.13  | 1.10  | 1.35  | 1.25  | 2.24E-02 | 1.37E-01 | 1.02E-01 |
| A_23_P30666  | 1.17  | 1.16  | 1.20  | 1.13  | 1.80  | 5.53E-01 | 1.30E-01 | 9.99E-02 |
| A_23_P135878 | 1.58  | 1.18  | 1.14  | -1.16 | 1.67  | 4.86E-02 | 6.87E-02 | 9.08E-02 |
| A_24_P229936 | -1.14 | -1.68 | -1.16 | 1.20  | -1.38 | 5.49E-01 | 6.29E-02 | 3.22E-01 |
| A_32_P90615  | 1.06  | 1.72  | 1.19  | 1.05  | 1.31  | 7.10E-01 | 4.21E-02 | 9.49E-02 |
| A_24_P7121   | -1.25 | -1.34 | -1.30 | 1.05  | -1.28 | 1.35E-01 | 3.81E-02 | 4.05E-02 |
| A_32_P3572   | -1.26 | -1.46 | -1.03 | -1.05 | -1.95 | 6.48E-02 | 1.70E-01 | 7.84E-01 |
| A_24_P51279  | 1.01  | 1.30  | 1.15  | 1.56  | 1.17  | 9.14E-01 | 2.56E-02 | 2.35E-01 |
| A_24_P342279 | -1.20 | -1.10 | -1.15 | -1.05 | -1.66 | 2.28E-01 | 4.93E-01 | 1.99E-01 |
| A_24_P926783 | -1.21 | -1.13 | 1.03  | -1.45 | -1.54 | 4.48E-01 | 3.19E-01 | 7.92E-01 |
| A_24_P826046 | -1.49 | -1.07 | -1.12 | -1.12 | -1.32 | 8.28E-04 | 4.13E-01 | 3.75E-02 |
| A_24_P304071 | -1.24 | 1.02  | -1.15 | -1.51 | -1.01 | 1.10E-01 | 9.50E-01 | 3.39E-01 |
| A_23_P163697 | -1.58 | -1.34 | 1.03  | -1.18 | -1.29 | 5.68E-02 | 2.74E-02 | 6.90E-01 |
| A_23_P131747 | -1.07 | -1.20 | 1.00  | -1.46 | -1.39 | 5.25E-01 | 9.43E-02 | 9.88E-01 |
| A_23_P252306 | -1.04 | 1.29  | 1.09  | 1.21  | 1.24  | 8.32E-01 | 3.55E-03 | 3.15E-01 |

|              |       |       |       |       |       |          |          |          |
|--------------|-------|-------|-------|-------|-------|----------|----------|----------|
| A_24_P69654  | -1.48 | -1.17 | 1.02  | -1.22 | -1.43 | 1.77E-02 | 5.11E-02 | 7.68E-01 |
| A_23_P46447  | -1.07 | -1.21 | -1.14 | -1.57 | -1.17 | 4.80E-01 | 1.44E-02 | 2.30E-02 |
| A_24_P62169  | -1.62 | -1.18 | 1.00  | 1.15  | -1.36 | 1.19E-01 | 1.58E-01 | 9.93E-01 |
| A_24_P762767 | 1.18  | 1.16  | 1.11  | 1.66  | 1.07  | 1.18E-01 | 4.95E-01 | 4.70E-01 |
| A_23_P96623  | 1.21  | 1.32  | 1.08  | 1.13  | 1.30  | 1.49E-01 | 1.85E-02 | 4.32E-01 |
| A_32_P800799 | 1.66  | -1.03 | 1.10  | 1.41  | 1.22  | 1.61E-02 | 6.95E-01 | 1.71E-01 |
| A_24_P612200 | 1.06  | 1.52  | 1.16  | 1.09  | 1.38  | 4.37E-01 | 9.11E-03 | 2.67E-01 |
| A_23_P359052 | -1.25 | -1.13 | -1.04 | -1.53 | -1.30 | 2.87E-01 | 5.95E-01 | 3.88E-01 |
| A_23_P334173 | -1.21 | -1.09 | -1.25 | -1.33 | -1.31 | 1.55E-01 | 6.15E-02 | 1.90E-02 |
| A_32_P60709  | 1.48  | 1.05  | 1.25  | 1.24  | 1.29  | 7.06E-02 | 7.11E-01 | 1.66E-01 |
| A_23_P134542 | -1.12 | 1.04  | -1.32 | -1.02 | -1.50 | 6.06E-01 | 8.47E-01 | 1.10E-01 |
| A_32_P11372  | -1.13 | -1.26 | -1.05 | -1.36 | -1.51 | 4.80E-01 | 5.16E-02 | 4.81E-01 |
| A_23_P110851 | 1.18  | 1.25  | -1.05 | 1.81  | 1.08  | 1.31E-01 | 5.29E-04 | 6.12E-01 |
| A_32_P12282  | 1.96  | 1.06  | -1.00 | 1.28  | 1.08  | 5.82E-03 | 5.39E-01 | 9.87E-01 |
| A_24_P307580 | 1.13  | 1.02  | 1.30  | 1.48  | 1.18  | 3.39E-01 | 8.70E-01 | 2.30E-02 |
| A_23_P435394 | 1.00  | -1.20 | -1.29 | -1.24 | -1.30 | 9.82E-01 | 1.50E-01 | 8.45E-02 |
| A_23_P156185 | 1.32  | 1.35  | -1.10 | 1.25  | 1.15  | 1.68E-01 | 3.37E-02 | 5.52E-01 |
| A_23_P77201  | 1.16  | 1.22  | 1.16  | 1.05  | 1.59  | 2.76E-01 | 6.83E-02 | 1.15E-01 |
| A_24_P161144 | 1.19  | 1.15  | -1.01 | 1.49  | 1.32  | 3.30E-01 | 2.02E-01 | 9.49E-01 |
| A_24_P10137  | -1.02 | -1.20 | 1.03  | -1.44 | -1.61 | 8.66E-01 | 5.45E-02 | 8.16E-01 |
| A_23_P75056  | -1.29 | -1.39 | -1.12 | 1.04  | -1.45 | 1.47E-01 | 5.89E-03 | 9.42E-02 |
| A_23_P388855 | -1.29 | -1.25 | 1.00  | -1.36 | -1.20 | 5.24E-02 | 5.23E-02 | 9.92E-01 |
| A_24_P128741 | -1.06 | -1.56 | -1.18 | -1.16 | -1.29 | 7.67E-01 | 6.85E-02 | 7.99E-02 |
| A_23_P75129  | -1.09 | -1.31 | 1.06  | -1.25 | -1.63 | 3.65E-01 | 5.95E-02 | 6.65E-01 |
| A_32_P110390 | 1.05  | 1.13  | 1.02  | 1.41  | 1.62  | 7.06E-01 | 2.08E-01 | 8.23E-01 |
| A_32_P70483  | 1.38  | 1.02  | 1.01  | 1.63  | 1.27  | 1.16E-01 | 8.62E-01 | 9.26E-01 |
| A_32_P220078 | 1.50  | 1.32  | 1.07  | 1.18  | 1.21  | 1.90E-02 | 7.63E-02 | 2.10E-01 |
| A_23_P405707 | 1.05  | 1.17  | 1.25  | 1.37  | 1.10  | 7.30E-01 | 1.46E-01 | 1.07E-02 |
| A_23_P153958 | -1.62 | 1.08  | -1.13 | -1.28 | -1.22 | 1.40E-01 | 7.81E-01 | 3.82E-01 |
| A_24_P251764 | -1.00 | -1.67 | -1.15 | -1.15 | -1.22 | 9.90E-01 | 1.57E-02 | 2.09E-01 |
| A_23_P154962 | 1.04  | -1.43 | 1.03  | -1.32 | 1.02  | 8.92E-01 | 2.98E-01 | 8.78E-01 |
| A_23_P395438 | -1.12 | -1.18 | -1.11 | -1.58 | -1.02 | 5.99E-01 | 3.62E-01 | 3.90E-01 |
| A_23_P18055  | 1.15  | 1.32  | -1.03 | 1.57  | 1.16  | 4.85E-01 | 1.96E-02 | 6.80E-01 |
| A_23_P31124  | -1.22 | -1.06 | -1.35 | -1.57 | 1.01  | 1.85E-01 | 6.15E-01 | 7.57E-04 |
| A_23_P104804 | -1.45 | -1.09 | -1.37 | -1.26 | -1.47 | 1.51E-01 | 1.57E-01 | 1.64E-02 |
| A_23_P117302 | 1.56  | 1.15  | -1.08 | 1.15  | 1.92  | 9.11E-02 | 1.16E-01 | 6.55E-01 |
| A_23_P56288  | 1.07  | -1.06 | 1.33  | 1.19  | 1.88  | 6.49E-01 | 7.89E-01 | 1.33E-01 |
| A_23_P156443 | -1.21 | -1.38 | 1.04  | -1.02 | -1.51 | 1.03E-01 | 6.79E-02 | 7.70E-01 |
| A_23_P372638 | -1.35 | -1.15 | -1.01 | -1.55 | -1.14 | 8.76E-02 | 2.99E-01 | 7.62E-01 |
| A_23_P208393 | 1.49  | 1.20  | 1.07  | 1.20  | 1.23  | 1.61E-02 | 3.15E-02 | 5.07E-01 |
| A_32_P18034  | -1.04 | 1.33  | 1.11  | 1.09  | 1.71  | 7.37E-01 | 9.39E-03 | 3.73E-01 |
| A_32_P193218 | -1.24 | 1.01  | -1.12 | -1.49 | -1.16 | 3.43E-02 | 9.29E-01 | 4.76E-01 |
| A_23_P94546  | -1.15 | -1.51 | -1.12 | -1.57 | 1.07  | 1.12E-01 | 5.52E-02 | 1.03E-01 |
| A_23_P171385 | -1.24 | -1.22 | -1.03 | -1.12 | -1.65 | 2.23E-01 | 2.32E-01 | 7.11E-01 |
| A_23_P133438 | -1.25 | -1.24 | -1.24 | -1.37 | -1.04 | 1.38E-01 | 1.11E-01 | 7.86E-02 |
| A_32_P45351  | -1.27 | -1.31 | -1.28 | -1.39 | 1.28  | 9.95E-02 | 2.21E-02 | 1.51E-02 |
| A_32_P919718 | 1.01  | 1.19  | 1.16  | 1.50  | 1.17  | 9.63E-01 | 1.34E-01 | 2.73E-01 |

|              |       |       |       |       |       |          |          |          |
|--------------|-------|-------|-------|-------|-------|----------|----------|----------|
| A_23_P3643   | 1.39  | -1.09 | 1.25  | 1.33  | 1.46  | 2.08E-01 | 4.93E-01 | 1.46E-01 |
| A_24_P564462 | 1.59  | 1.14  | 1.06  | 1.31  | 1.17  | 1.06E-02 | 1.69E-02 | 5.16E-01 |
| A_24_P320645 | -1.39 | 1.03  | -1.20 | -1.07 | -1.67 | 7.78E-02 | 7.67E-01 | 5.82E-02 |
| A_32_P164477 | -1.19 | -1.37 | -1.20 | -1.26 | 1.15  | 3.88E-01 | 1.80E-01 | 1.72E-01 |
| A_32_P137391 | 1.31  | 1.30  | 1.32  | 1.03  | 1.09  | 1.52E-01 | 2.69E-01 | 3.17E-02 |
| A_23_P201837 | -1.12 | -1.09 | -1.12 | -1.31 | -1.49 | 2.43E-01 | 2.83E-01 | 1.75E-01 |
| A_32_P385    | 1.09  | 1.24  | 1.14  | 1.48  | 1.00  | 6.32E-01 | 3.52E-01 | 2.35E-01 |
| A_23_P149390 | 1.20  | 1.07  | 1.16  | 1.27  | 1.73  | 3.33E-01 | 6.57E-01 | 3.17E-01 |
| A_23_P319050 | 1.45  | 1.21  | 1.15  | 1.06  | 1.66  | 2.70E-01 | 3.60E-01 | 5.22E-01 |
| A_24_P170295 | 1.00  | -1.12 | -1.10 | -1.25 | -1.69 | 9.89E-01 | 4.72E-01 | 3.05E-01 |
| A_32_P129810 | 1.14  | 1.40  | 1.10  | 1.39  | 1.21  | 3.08E-01 | 8.85E-02 | 3.75E-01 |
| A_24_P159515 | 1.31  | 1.11  | 1.15  | 1.20  | 1.58  | 5.81E-02 | 2.81E-01 | 3.67E-01 |
| A_23_P359636 | -1.12 | -1.37 | -1.00 | -1.16 | -1.45 | 3.59E-01 | 1.85E-02 | 9.85E-01 |
| A_32_P105694 | -1.26 | 1.27  | 1.10  | 1.47  | 1.36  | 3.14E-01 | 1.07E-01 | 6.16E-01 |
| A_24_P126246 | 1.33  | 1.09  | 1.08  | 1.57  | 1.32  | 2.19E-01 | 7.34E-01 | 5.13E-01 |
| A_23_P150189 | -1.18 | -1.07 | -1.15 | -1.45 | -1.27 | 2.71E-01 | 5.43E-01 | 9.97E-02 |
| A_24_P290623 | -1.00 | 1.18  | 1.42  | 1.62  | 1.03  | 9.92E-01 | 4.19E-01 | 4.17E-02 |
| A_23_P211064 | -1.22 | 1.00  | -1.15 | -1.29 | -1.35 | 2.94E-01 | 9.81E-01 | 2.39E-01 |
| A_32_P66684  | 1.21  | 1.33  | 1.06  | 1.74  | -1.04 | 3.13E-01 | 2.44E-02 | 4.59E-01 |
| A_32_P13719  | 1.25  | 1.21  | 1.15  | 1.02  | 1.45  | 1.41E-01 | 8.55E-02 | 2.19E-01 |
| A_23_P216199 | -1.43 | -1.07 | -1.22 | -1.12 | -1.53 | 6.43E-02 | 5.87E-01 | 3.51E-01 |
| A_24_P75543  | 1.65  | 1.01  | 1.05  | 1.30  | 1.33  | 2.46E-02 | 8.18E-01 | 6.81E-01 |
| A_23_P39386  | -1.34 | -1.28 | -1.10 | -1.01 | -1.19 | 8.13E-02 | 3.87E-03 | 3.35E-01 |
| A_24_P2584   | -1.12 | -1.14 | 1.00  | -1.21 | -1.86 | 2.27E-01 | 3.40E-01 | 9.87E-01 |
| A_32_P72553  | -1.31 | -1.03 | -1.01 | -1.18 | -1.69 | 1.62E-02 | 7.46E-01 | 8.65E-01 |
| A_24_P278552 | 1.17  | 1.15  | 1.57  | 1.45  | -1.16 | 5.26E-01 | 1.34E-01 | 3.32E-02 |
| A_23_P57474  | 1.18  | 1.24  | 1.07  | 1.28  | 1.47  | 4.98E-01 | 2.36E-02 | 4.61E-01 |
| A_24_P943180 | 1.14  | 1.27  | 1.19  | 1.08  | 1.44  | 4.23E-01 | 1.47E-01 | 1.59E-01 |
| A_24_P945113 | -1.19 | -1.08 | -1.13 | -1.32 | -1.63 | 5.04E-01 | 2.25E-01 | 3.44E-01 |
| A_32_P24382  | 1.28  | 1.33  | 1.19  | 1.16  | 1.01  | 4.79E-01 | 1.12E-01 | 5.42E-01 |
| A_23_P216812 | -1.07 | -1.25 | 1.01  | -1.27 | -1.65 | 6.26E-01 | 7.00E-02 | 9.26E-01 |
| A_23_P112187 | 1.47  | 1.01  | 1.11  | 1.15  | 1.24  | 2.01E-02 | 9.53E-01 | 5.38E-01 |
| A_24_P59220  | -1.11 | -1.02 | -1.01 | -1.42 | -1.59 | 5.26E-01 | 8.10E-01 | 8.73E-01 |
| A_24_P179569 | -1.30 | -1.13 | -1.19 | 1.13  | -1.58 | 1.63E-01 | 4.06E-01 | 1.76E-01 |
| A_24_P100277 | -1.01 | 1.04  | -1.29 | -1.33 | -1.53 | 9.07E-01 | 6.11E-01 | 9.31E-03 |
| A_23_P154688 | 1.05  | 1.31  | 1.12  | 1.20  | 1.45  | 7.17E-01 | 5.31E-02 | 2.04E-01 |
| A_23_P18246  | 1.38  | 1.20  | 1.09  | 1.16  | 1.22  | 7.71E-03 | 4.86E-02 | 2.58E-01 |
| A_24_P412156 | 1.03  | -1.05 | -1.13 | -1.34 | -1.33 | 9.42E-01 | 6.99E-01 | 5.24E-01 |
| A_32_P39093  | 1.16  | 1.48  | 1.06  | 1.06  | 1.41  | 2.18E-01 | 5.21E-03 | 2.72E-01 |
| A_24_P868583 | -1.01 | -1.11 | -1.40 | -1.23 | 1.10  | 9.58E-01 | 7.29E-01 | 1.52E-03 |
| A_24_P75456  | 1.60  | 1.01  | 1.03  | 1.44  | 1.31  | 5.47E-02 | 8.80E-01 | 7.44E-01 |
| A_23_P323154 | 1.35  | -1.02 | 1.07  | 1.30  | 1.52  | 4.97E-02 | 8.87E-01 | 4.98E-01 |
| A_23_P52939  | -1.54 | -1.17 | -1.25 | 1.05  | -1.06 | 2.74E-03 | 9.12E-02 | 2.11E-03 |
| A_24_P137563 | -1.29 | -1.52 | -1.04 | -1.24 | -1.12 | 6.70E-02 | 2.43E-02 | 4.62E-01 |
| A_23_P212552 | -1.14 | -1.17 | -1.10 | -1.76 | 1.00  | 3.12E-01 | 2.66E-02 | 1.70E-01 |
| A_23_P17560  | -1.18 | -1.11 | -1.15 | -1.09 | -1.72 | 2.50E-01 | 4.29E-01 | 2.32E-01 |
| A_24_P79529  | -1.35 | -1.19 | -1.06 | 1.37  | -1.63 | 9.63E-02 | 4.01E-01 | 7.08E-01 |



|              |       |       |       |       |       |          |          |          |
|--------------|-------|-------|-------|-------|-------|----------|----------|----------|
| A_24_P371670 | -1.14 | -1.24 | -1.00 | -1.20 | -1.57 | 1.92E-01 | 2.95E-02 | 9.71E-01 |
| A_24_P500621 | 1.13  | 1.19  | 1.29  | 1.18  | 1.35  | 2.36E-01 | 3.29E-03 | 3.34E-03 |
| A_24_P557534 | -1.32 | -1.56 | -1.06 | -1.19 | -1.01 | 1.93E-02 | 2.57E-03 | 2.77E-01 |
| A_32_P82863  | -1.22 | -1.40 | 1.00  | -1.49 | -1.21 | 1.23E-02 | 1.61E-01 | 9.89E-01 |
| A_23_P130027 | 1.41  | 1.13  | -1.01 | 1.37  | 1.41  | 1.17E-01 | 3.65E-01 | 8.63E-01 |
| A_23_P208866 | -1.32 | -1.29 | -1.08 | -1.02 | -1.41 | 9.68E-02 | 1.07E-02 | 4.48E-01 |
| A_24_P201702 | -1.12 | -1.49 | -1.09 | -1.08 | -1.25 | 3.79E-01 | 2.94E-03 | 2.32E-01 |
| A_23_P385034 | 1.19  | 1.19  | 1.41  | -1.08 | 1.42  | 3.39E-01 | 3.05E-02 | 2.22E-03 |
| A_24_P932293 | 1.15  | 1.04  | 1.62  | 1.18  | 1.12  | 3.09E-01 | 7.72E-01 | 3.02E-03 |
| A_23_P82379  | -1.03 | -1.11 | -1.21 | -1.18 | -1.70 | 9.02E-01 | 1.91E-01 | 9.89E-02 |
| A_23_P303149 | -1.19 | -1.11 | -1.18 | 1.00  | -1.64 | 3.06E-01 | 2.84E-01 | 1.50E-01 |
| A_32_P147505 | 1.01  | -1.08 | -1.14 | -1.39 | -1.46 | 9.08E-01 | 5.51E-01 | 5.36E-02 |
| A_24_P284213 | -1.44 | -1.01 | -1.03 | -1.29 | -1.38 | 6.24E-02 | 9.77E-01 | 7.47E-01 |
| A_32_P192354 | -1.18 | -1.14 | -1.33 | -1.05 | -1.28 | 4.83E-01 | 4.43E-01 | 4.39E-02 |
| A_24_P226210 | -1.08 | -1.28 | -1.20 | -1.50 | -1.17 | 3.74E-01 | 1.25E-01 | 1.70E-01 |
| A_23_P501961 | 1.11  | 1.24  | 1.24  | 1.05  | 1.44  | 2.34E-01 | 9.45E-02 | 2.25E-02 |
| A_23_P258504 | -1.53 | -1.14 | -1.28 | 1.33  | -1.38 | 2.97E-02 | 3.52E-01 | 1.91E-03 |
| A_32_P68050  | -1.12 | -1.44 | 1.04  | -1.51 | -1.12 | 2.68E-01 | 1.99E-02 | 6.67E-01 |
| A_23_P37954  | 1.13  | 1.37  | 1.04  | 1.24  | 1.39  | 4.88E-01 | 2.62E-01 | 7.21E-01 |
| A_23_P51926  | 1.22  | 1.31  | 1.23  | 1.01  | -1.09 | 1.37E-01 | 4.86E-02 | 3.66E-02 |
| A_23_P34700  | -1.32 | -1.13 | -1.43 | 1.02  | -1.19 | 6.25E-02 | 3.17E-01 | 1.17E-04 |
| A_23_P163467 | 1.18  | 1.04  | 1.14  | 1.34  | 1.28  | 1.14E-01 | 7.48E-01 | 7.31E-02 |
| A_32_P112223 | -1.72 | -1.25 | -1.16 | -1.08 | 1.14  | 1.81E-02 | 2.93E-01 | 1.35E-01 |
| A_24_P914590 | -1.03 | 1.00  | -1.10 | -1.43 | -1.85 | 8.13E-01 | 9.53E-01 | 2.84E-01 |
| A_32_P12504  | 1.24  | 1.21  | 1.14  | 1.11  | 1.46  | 1.77E-01 | 9.97E-02 | 2.06E-01 |
| A_23_P212050 | 1.16  | 1.13  | 1.23  | 1.03  | 1.45  | 3.83E-01 | 2.80E-01 | 5.14E-02 |
| A_24_P247820 | 1.22  | 1.19  | 1.17  | 1.26  | 1.16  | 2.41E-01 | 8.97E-02 | 2.93E-01 |
| A_23_P73747  | -1.07 | -1.23 | -1.09 | -1.45 | -1.14 | 6.87E-01 | 1.58E-01 | 2.56E-01 |
| A_23_P18818  | 1.49  | -1.00 | 1.15  | 1.42  | 1.03  | 9.84E-02 | 9.90E-01 | 3.57E-01 |
| A_24_P341863 | 1.29  | 1.19  | 1.10  | 1.07  | 1.52  | 1.14E-01 | 2.01E-01 | 6.07E-01 |
| A_23_P204696 | -1.37 | -1.20 | -1.13 | -1.04 | -1.57 | 1.46E-01 | 1.76E-01 | 2.22E-01 |
| A_23_P412214 | 1.09  | 1.21  | -1.02 | 1.26  | 1.76  | 6.14E-01 | 2.81E-02 | 9.00E-01 |
| A_23_P46725  | -1.41 | -1.22 | -1.01 | -1.03 | -1.51 | 7.98E-02 | 2.52E-01 | 8.94E-01 |
| A_32_P206549 | -1.01 | 1.28  | 1.02  | 1.23  | 1.67  | 9.71E-01 | 1.64E-01 | 7.05E-01 |
| A_24_P935026 | 1.12  | 1.04  | 1.46  | 1.15  | 1.10  | 5.87E-01 | 8.00E-01 | 1.19E-02 |
| A_32_P168442 | -1.36 | -1.45 | -1.18 | 1.06  | 1.08  | 4.82E-02 | 1.58E-01 | 2.48E-01 |
| A_24_P77904  | -1.04 | -1.22 | -1.06 | -1.28 | -1.76 | 8.49E-01 | 9.62E-02 | 8.22E-01 |
| A_23_P70660  | -1.34 | -1.22 | -1.17 | -1.20 | -1.17 | 1.57E-02 | 4.40E-03 | 9.47E-04 |
| A_23_P170608 | -1.32 | -1.16 | -1.18 | -1.09 | -1.32 | 6.19E-02 | 3.95E-01 | 1.02E-01 |
| A_23_P343826 | 1.41  | 1.18  | -1.07 | 1.23  | 1.47  | 1.28E-01 | 7.71E-02 | 7.01E-01 |
| A_24_P928765 | 1.06  | 1.15  | 1.39  | 1.36  | 1.13  | 8.16E-01 | 1.94E-01 | 8.20E-02 |
| A_32_P45168  | -1.08 | -1.10 | -1.06 | -1.52 | -1.35 | 4.45E-01 | 1.99E-01 | 6.13E-01 |
| A_23_P35576  | -1.16 | -1.26 | -1.04 | -1.67 | -1.09 | 4.39E-01 | 1.62E-01 | 6.41E-01 |
| A_23_P332908 | -1.18 | -1.30 | -1.08 | -1.33 | -1.26 | 3.63E-01 | 3.33E-02 | 2.45E-01 |
| A_23_P335920 | 1.37  | 1.47  | 1.16  | -1.04 | 1.11  | 4.39E-03 | 2.85E-03 | 1.72E-04 |
| A_23_P86610  | -1.47 | -1.16 | -1.14 | 1.00  | 1.15  | 1.69E-02 | 3.22E-01 | 3.93E-01 |
| A_24_P896619 | 1.11  | 1.11  | 1.58  | 1.12  | 1.31  | 5.00E-01 | 4.21E-01 | 3.05E-02 |

|              |      |      |      |      |      |          |          |          |
|--------------|------|------|------|------|------|----------|----------|----------|
| A_23_P328022 | 1.07 | 1.17 | 1.00 | 1.53 | 1.37 | 6.15E-01 | 3.42E-01 | 9.89E-01 |
| A_23_P409438 | 1.26 | 1.18 | 1.05 | 1.13 | 1.61 | 3.79E-02 | 2.28E-01 | 7.51E-01 |
| A_23_P10591  | 1.15 | 1.25 | 1.02 | 1.21 | 1.83 | 3.20E-01 | 3.65E-02 | 8.22E-01 |

|          |          | Fold change   | P value       | PrimaryAccession | UniGeneID | GeneSymbol |
|----------|----------|---------------|---------------|------------------|-----------|------------|
| AS       | Ethnic   | Meta analysis | Meta analysis |                  |           |            |
| 8.18E-01 | 2.66E-05 | 4.14          | 1.77E-02      | NM_002988        | Hs.143961 | CCL18      |
| 8.06E-02 | 9.63E-03 | 3.36          | 8.77E-03      | NM_181534        | Hs.55412  | KRT25      |
| 1.87E-04 | 2.53E-02 | -2.77         | 6.46E-04      | NM_198956        | Hs.195922 | SP8        |
| 5.82E-01 | 4.87E-01 | 2.48          | 1.93E-02      | NM_000550        | Hs.270279 | TYRP1      |
| 3.57E-01 | 9.47E-01 | 2.32          | 1.06E-02      | NM_006928        | Hs.95972  | SILV       |
| 3.49E-02 | 5.12E-03 | -2.24         | 3.29E-03      | NM_006160        | Hs.322431 | NEUROD2    |
| 2.08E-01 | 8.55E-01 | 2.23          | 8.20E-03      | NM_006928        | Hs.95972  | SILV       |
| 3.64E-04 | 3.93E-01 | -2.22         | 2.26E-04      | NM_176813        | Hs.100686 | AGR3       |
| 4.05E-01 | 1.32E-03 | -2.12         | 3.99E-04      | NM_133431        | Hs.112208 | XAGE1D     |
| 4.42E-02 | 2.79E-03 | 2.09          | 3.41E-02      | BC010054         |           | RPSA       |
| 1.33E-03 | 7.92E-01 | -2.02         | 7.73E-03      | NM_004086        | Hs.21016  | COCH       |
| 1.65E-01 | 2.82E-03 | -1.97         | 6.41E-10      | NM_005235        | Hs.390729 | ERBB4      |
| 1.59E-01 | 8.06E-01 | 1.94          | 3.27E-03      | NM_152738        | Hs.173337 | C6orf218   |
| 4.38E-01 | 4.69E-01 | 1.93          | 3.53E-02      | NM_030967        | Hs.247934 | KRTAP1-1   |
| 1.75E-02 | 4.94E-02 | -1.90         | 2.78E-03      | NM_080676        | Hs.661576 | MACROD2    |
| 4.31E-01 | 4.53E-01 | 1.90          | 2.55E-03      | NM_000273        | Hs.74124  | GPR143     |
| 7.57E-03 | 9.25E-01 | 1.90          | 8.63E-03      | THC2711870       |           |            |
| 5.90E-03 | 2.99E-01 | -1.89         | 8.63E-05      | NM_000517        | Hs.654744 | HBA2       |
| 1.50E-03 | 7.83E-03 | 1.89          | 3.09E-02      | NM_138813        | Hs.306212 | ATP8B3     |
| 3.06E-01 | 9.69E-01 | 1.89          | 2.00E-02      | THC2675163       |           |            |
| 5.63E-03 | 3.10E-01 | -1.87         | 2.87E-04      | NM_000517        | Hs.654744 | HBA2       |
| 8.42E-01 | 3.84E-01 | 1.87          | 4.28E-02      | NM_000372        | Hs.503555 | TYR        |
| 4.61E-03 | 3.68E-01 | 1.85          | 5.66E-04      | NM_181607        | Hs.61552  | KRTAP19-1  |
| 5.19E-01 | 5.32E-01 | 1.85          | 2.20E-02      | NM_003991        | Hs.82002  | EDNRB      |
| 8.24E-02 | 1.75E-02 | 1.85          | 2.02E-02      | NM_001004298     | Hs.587663 | C10orf90   |
| 5.27E-01 | 6.08E-01 | 1.83          | 3.63E-02      | NM_002420        | Hs.155942 | TRPM1      |
| 1.93E-03 | 6.06E-03 | 1.82          | 4.08E-04      | AF289567         | Hs.684029 |            |
| 4.27E-03 | 8.13E-01 | -1.80         | 2.82E-02      | NM_004086        | Hs.21016  | COCH       |
| 3.00E-02 | 4.20E-02 | 1.79          | 1.47E-06      | NM_020299        | Hs.116724 | AKR1B10    |
| 4.05E-01 | 2.07E-01 | 1.78          | 4.18E-03      | NM_025139        | Hs.471610 | ARMC9      |
| 3.03E-06 | 5.63E-02 | 1.77          | 4.10E-02      | NM_003125        | Hs.1076   | SPRR1B     |
| 4.29E-04 | 6.32E-02 | 1.77          | 9.98E-03      | NM_012206        | Hs.129711 | HAVCR1     |
| 3.26E-02 | 5.44E-02 | 1.76          | 7.41E-06      | NM_020299        | Hs.116724 | AKR1B10    |
| 8.82E-05 | 6.69E-05 | -1.75         | 1.76E-02      | NM_004061        | Hs.113684 | CDH12      |
| 9.76E-02 | 3.72E-01 | 1.74          | 1.62E-02      | NM_032588        | Hs.279709 | TRIM63     |
| 7.32E-01 | 9.12E-01 | 1.74          | 3.49E-02      | NM_006877        | Hs.484741 | GMPR       |
| 9.20E-01 | 6.65E-01 | -1.73         | 3.23E-02      | NM_001926        | Hs.711    | DEFA6      |
| 3.16E-02 | 3.27E-03 | -1.72         | 5.86E-04      | AK054921         | Hs.571748 | CDR1       |
| 3.87E-01 | 2.73E-01 | -1.71         | 3.00E-02      | NM_016522        | Hs.504352 | HNT        |
| 5.79E-01 | 1.58E-01 | -1.70         | 3.84E-04      | NM_174914        | Hs.348941 | UGT3A2     |
| 1.06E-02 | 9.14E-01 | -1.70         | 5.74E-03      | NM_000558        | Hs.449630 | HBA1       |
| 2.54E-02 | 5.51E-01 | 1.69          | 6.91E-04      | NM_178012        | Hs.300701 | TUBB2B     |
| 2.76E-01 | 5.52E-01 | 1.68          | 2.68E-03      | BC008034         |           |            |
| 2.49E-03 | 1.76E-01 | 1.68          | 1.33E-02      | NM_181607        | Hs.61552  | KRTAP19-1  |
| 4.37E-05 | 1.82E-02 | 1.67          | 7.46E-06      | NM_007210        | Hs.505575 | GALNT6     |
| 2.40E-01 | 4.46E-01 | -1.66         | 7.68E-09      | NM_001765        | Hs.132448 | CD1C       |

|          |          |       |          |                 |           |           |
|----------|----------|-------|----------|-----------------|-----------|-----------|
| 1.60E-02 | 1.03E-01 | 1.66  | 1.58E-08 |                 |           |           |
| 1.34E-01 | 8.92E-01 | -1.66 | 5.76E-05 | NM_001012415    | Hs.120464 | SOHLH1    |
| 7.39E-01 | 6.30E-02 | -1.66 | 5.17E-03 | NM_003054       | Hs.654476 | SLC18A2   |
| 4.61E-01 | 6.99E-01 | 1.65  | 8.01E-03 | NM_016180       | Hs.278962 | SLC45A2   |
| 1.38E-03 | 4.29E-02 | 1.65  | 2.60E-03 | D00044          | Hs.514107 | CCL3      |
| 9.54E-05 | 9.75E-02 | 1.65  | 8.39E-03 | NM_016190       | Hs.242057 | CRNN      |
| 4.05E-01 | 5.42E-01 | 1.65  | 7.52E-03 | NM_032524       | Hs.307022 | KRTAP4-4  |
| 1.37E-04 | 7.62E-03 | 1.65  | 1.80E-02 | NM_175053       | Hs.660125 | KRT74     |
| 1.82E-03 | 1.60E-02 | -1.65 | 2.00E-04 | NM_004616       | Hs.170563 | TSPAN8    |
| 5.10E-03 | 4.72E-01 | 1.64  | 2.13E-02 | NM_025139       | Hs.471610 | ARMC9     |
| 7.04E-04 | 8.77E-01 | 1.64  | 1.13E-02 | NM_013364       | Hs.449627 | PNMA3     |
| 8.49E-05 | 7.12E-01 | -1.64 | 2.80E-02 | NM_178127       | Hs.318370 | ANGPTL5   |
| 2.99E-03 | 1.42E-01 | 1.63  | 7.73E-05 | NM_013358       | Hs.412941 | PADI1     |
| 7.63E-01 | 2.66E-03 | 1.63  | 2.42E-03 | NM_052906       | Hs.705655 | ELFN2     |
| 1.41E-03 | 3.80E-02 | 1.63  | 2.90E-03 | AK124776        | Hs.444290 |           |
| 2.26E-03 | 2.50E-01 | 1.62  | 4.13E-04 | NM_005987       | Hs.46320  | SPRR1A    |
| 5.33E-01 | 1.10E-02 | 1.62  | 6.88E-03 | NM_173505       | Hs.374774 | ANKRD29   |
| 7.73E-02 | 6.47E-01 | -1.62 | 1.42E-02 | NM_000518       | Hs.523443 | HBB       |
| 3.45E-02 | 1.11E-01 | -1.62 | 3.88E-03 | NM_019029       | Hs.233389 | CPVL      |
| 1.90E-03 | 4.79E-03 | -1.62 | 8.43E-04 | NM_002023       | Hs.519168 | FMOD      |
| 5.27E-01 | 5.99E-04 | -1.61 | 2.55E-02 | NM_002121       | Hs.485130 | HLA-DPB1  |
| 1.94E-01 | 1.44E-01 | 1.61  | 1.04E-02 | ENST00000345847 | Hs.307014 |           |
| 5.77E-03 | 1.57E-02 | 1.61  | 1.65E-02 | THC2635964      |           |           |
| 3.61E-03 | 3.17E-02 | 1.61  | 3.14E-02 | NM_153646       | Hs.510281 | SLC24A4   |
| 2.04E-04 | 1.41E-02 | 1.61  | 9.57E-04 | NM_001444       | Hs.408061 | FABP5     |
| 2.82E-03 | 6.43E-02 | 1.60  | 1.10E-04 | XM_001125944    |           | LOC344332 |
| 4.46E-02 | 3.02E-03 | -1.60 | 2.68E-02 | ENST00000308384 | Hs.646975 |           |
| 6.85E-01 | 3.01E-02 | 1.59  | 2.17E-03 |                 |           |           |
| 1.02E-01 | 5.21E-01 | -1.59 | 9.83E-03 | NM_000519       | Hs.699280 | HBD       |
| 2.31E-02 | 3.34E-04 | -1.58 | 3.21E-02 | NM_004378       | Hs.346950 | CRABP1    |
| 2.41E-02 | 7.40E-04 | 1.58  | 3.02E-02 | NM_178434       | Hs.490211 | LCE3C     |
| 7.13E-02 | 1.75E-02 | 1.58  | 4.62E-02 | NM_030649       | Hs.535257 | CENTB5    |
| 1.29E-01 | 6.61E-03 | -1.58 | 6.70E-03 | ENST00000383121 | Hs.409934 |           |
| 5.98E-02 | 3.33E-03 | -1.58 | 1.23E-03 | NM_002125       | Hs.534322 | HLA-DRB5  |
| 1.66E-01 | 1.59E-01 | -1.58 | 3.39E-04 | NM_006889       | Hs.171182 | CD86      |
| 1.12E-02 | 2.93E-03 | -1.57 | 2.37E-03 | THC2742812      |           |           |
| 1.86E-02 | 1.86E-03 | 1.57  | 3.23E-02 | NM_005416       | Hs.139322 | SPRR3     |
| 4.45E-01 | 2.14E-02 | 1.56  | 3.89E-02 | ENST00000377006 | Hs.628968 |           |
| 3.37E-02 | 4.54E-03 | -1.56 | 1.15E-08 | NM_007102       | Hs.32966  | GUCA2B    |
| 7.20E-02 | 5.76E-02 | 1.56  | 1.30E-02 | NM_033448       | Hs.660007 | KRT71     |
| 1.91E-01 | 8.01E-03 | 1.55  | 2.89E-06 | NM_015210       | Hs.650822 | KIAA0802  |
| 7.62E-02 | 4.14E-01 | -1.55 | 9.14E-03 | NM_000032       | Hs.522666 | ALAS2     |
| 7.77E-01 | 1.15E-01 | 1.55  | 3.51E-02 | NM_004183       | Hs.705554 | BEST1     |
| 1.80E-04 | 3.62E-01 | 1.55  | 6.22E-03 | NM_001080494    | Hs.112949 | C1orf34   |
| 2.47E-01 | 5.16E-02 | 1.55  | 7.22E-03 | NM_002279       | Hs.32950  | KRT33B    |
| 2.09E-03 | 3.01E-01 | -1.54 | 6.66E-16 | BI836406        | Hs.130203 |           |
| 5.30E-01 | 7.70E-01 | -1.54 | 4.02E-02 | NM_001926       | Hs.711    | DEFA6     |

|          |          |       |          |                 |           |          |
|----------|----------|-------|----------|-----------------|-----------|----------|
| 6.03E-03 | 2.89E-01 | 1.54  | 1.33E-06 | NM_023112       | Hs.278815 | OTUB2    |
| 1.10E-02 | 6.62E-02 | 1.54  | 3.33E-03 | NM_002108       | Hs.190783 | HAL      |
| 1.93E-01 | 6.55E-01 | 1.54  | 1.02E-05 | NM_000166       | Hs.333303 | GJB1     |
| 3.82E-04 | 2.81E-01 | 1.54  | 1.16E-04 | DA727827        | Hs.670082 |          |
| 2.72E-04 | 8.88E-03 | 1.54  | 1.11E-10 | NM_001099676    | Hs.535190 | C12orf56 |
| 3.69E-02 | 3.53E-02 | 1.53  | 3.71E-06 | NM_006086       | Hs.511743 | TUBB3    |
| 1.31E-01 | 6.15E-01 | 1.53  | 4.47E-02 | AX721193        | Hs.635114 |          |
| 7.27E-01 | 3.40E-01 | -1.53 | 4.05E-02 | NM_080676       | Hs.661576 | MACROD2  |
| 9.03E-02 | 1.24E-02 | -1.53 | 1.54E-02 | NM_002121       | Hs.485130 | HLA-DPB1 |
| 5.15E-02 | 1.85E-02 | 1.53  | 4.36E-03 | NM_080869       | Hs.352180 | WFDC12   |
| 6.23E-03 | 2.03E-02 | 1.53  | 2.08E-02 | AK091366        | Hs.650266 | FLJ34047 |
| 8.44E-03 | 4.61E-02 | -1.53 | 7.24E-07 | NM_144669       | Hs.655668 | GLT1D1   |
| 2.69E-01 | 1.38E-01 | -1.53 | 1.08E-02 | NM_020056       | Hs.591798 | HLA-DQA2 |
| 8.36E-01 | 4.08E-03 | -1.52 | 1.91E-02 | NM_001079529    | Hs.646912 | FAM153B  |
| 2.60E-02 | 2.16E-02 | -1.52 | 8.07E-03 | NM_022555       | Hs.534322 | HLA-DRB3 |
| 1.51E-01 | 2.26E-01 | -1.52 | 2.21E-02 | NM_002838       | Hs.654514 | PTPRC    |
| 9.36E-01 | 1.52E-02 | -1.51 | 4.51E-02 | NM_000246       | Hs.701991 | CIITA    |
| 1.84E-01 | 5.95E-02 | -1.51 | 7.87E-04 | NM_001763       | Hs.1309   | CD1A     |
| 1.20E-01 | 1.09E-03 | 1.51  | 1.12E-02 | NM_012413       | Hs.79033  | QPCT     |
| 3.71E-03 | 9.87E-01 | -1.51 | 2.43E-02 | NM_001003679    | Hs.705413 | LEPR     |
| 3.44E-05 | 9.81E-02 | -1.51 | 4.63E-03 | NM_006682       | Hs.520989 | FGL2     |
| 9.68E-01 | 1.64E-03 | -1.51 | 3.99E-02 | NM_024867       | Hs.298863 | SPEF2    |
| 4.15E-01 | 3.13E-01 | -1.51 | 8.00E-03 | AW451533        | Hs.610260 |          |
| 4.18E-04 | 5.00E-02 | 1.51  | 1.08E-03 | NM_173681       | Hs.647092 | ATG9B    |
| 6.61E-01 | 3.05E-01 | -1.50 | 2.67E-04 | NM_002089       | Hs.590921 | CXCL2    |
| 4.82E-01 | 1.35E-01 | -1.50 | 1.52E-03 | NM_003874       | Hs.398093 | CD84     |
| 1.18E-01 | 4.20E-02 | -1.50 | 2.70E-05 | NM_002123       | Hs.409934 | HLA-DQB1 |
| 5.87E-03 | 2.99E-01 | -1.50 | 1.30E-03 | NM_021958       | Hs.74870  | HLX      |
| 6.97E-02 | 2.81E-01 | 1.50  | 9.81E-04 | NM_000392       | Hs.368243 | ABCC2    |
| 3.59E-01 | 3.36E-01 | 1.49  | 1.21E-02 | THC2643957      |           |          |
| 7.19E-02 | 7.49E-01 | 1.49  | 2.66E-02 | NM_144677       | Hs.144531 | MGAT5B   |
| 1.68E-01 | 5.91E-01 | 1.49  | 1.12E-02 | NM_000392       | Hs.368243 | ABCC2    |
| 5.21E-02 | 4.69E-01 | 1.49  | 1.53E-03 | NM_205848       | Hs.370963 | SYT6     |
| 8.40E-03 | 1.00E-01 | 1.49  | 2.58E-05 | NM_001012716    | Hs.274959 | C18orf56 |
| 1.32E-01 | 5.02E-03 | -1.49 | 4.08E-02 | NM_004001       | Hs.654395 | FCGR2B   |
| 7.64E-01 | 8.43E-03 | -1.49 | 2.73E-03 | NM_001079527    | Hs.652193 | FAM153C  |
| 4.92E-01 | 8.28E-03 | -1.49 | 1.63E-02 | NM_018690       | Hs.200333 | APOB48R  |
| 3.62E-01 | 3.05E-02 | 1.49  | 4.84E-03 | NM_032539       | Hs.320368 | SLITRK2  |
| 1.23E-02 | 1.89E-01 | 1.49  | 4.63E-03 | THC2633920      |           |          |
| 4.77E-02 | 1.13E-03 | 1.49  | 1.18E-02 | NM_012413       | Hs.79033  | QPCT     |
| 1.71E-01 | 5.26E-03 | -1.49 | 1.24E-02 | NM_021983       | Hs.705372 | HLA-DRB4 |
| 2.94E-04 | 7.42E-01 | -1.49 | 7.73E-14 | NM_175571       | Hs.647121 | GIMAP8   |
| 9.73E-01 | 2.09E-02 | -1.49 | 3.55E-03 | NM_199328       | Hs.162209 | CLDN8    |
| 6.18E-01 | 5.86E-02 | -1.48 | 4.17E-07 | ENST00000327506 | Hs.361778 |          |
| 6.24E-04 | 2.49E-02 | 1.48  | 4.03E-04 | NM_001444       | Hs.408061 | FABP5    |
| 7.51E-01 | 9.63E-01 | 1.48  | 3.99E-02 | BC034319        | Hs.363526 |          |
| 1.69E-01 | 1.06E-03 | 1.48  | 4.99E-02 | AK095214        |           |          |

|          |          |       |          |                 |           |             |
|----------|----------|-------|----------|-----------------|-----------|-------------|
| 7.42E-01 | 2.18E-02 | -1.48 | 3.86E-02 | NM_020056       | Hs.591798 | HLA-DQA2    |
| 1.04E-03 | 1.06E-01 | 1.48  | 1.10E-03 | NM_025153       | Hs.109358 | ATP10B      |
| 1.56E-02 | 6.59E-03 | -1.48 | 7.13E-03 | NM_004538       | Hs.21365  | NAP1L3      |
| 3.68E-01 | 3.16E-02 | -1.48 | 1.09E-05 | NM_006762       | Hs.371021 | LAPTM5      |
| 6.04E-02 | 1.04E-02 | -1.48 | 5.09E-03 | NM_002124       | Hs.534322 | HLA-DRB1    |
| 1.60E-01 | 1.55E-01 | -1.48 | 2.33E-02 | NM_001003927    | Hs.591198 | EVI2A       |
| 1.06E-01 | 3.43E-04 | 1.48  | 1.79E-02 | NM_001080407    | Hs.436178 | GLB1L3      |
| 1.88E-02 | 4.01E-03 | 1.48  | 5.51E-08 | ENST00000326470 | Hs.199763 |             |
| 2.89E-01 | 3.69E-01 | -1.47 | 1.31E-03 |                 |           |             |
| 5.95E-02 | 8.61E-02 | 1.47  | 3.50E-04 | ENST00000309447 | Hs.4280   | KIAA1239    |
| 2.01E-05 | 8.64E-02 | 1.47  | 9.78E-03 | NM_016490       | Hs.107922 | LOC51252    |
| 3.20E-02 | 7.80E-03 | 1.47  | 3.95E-03 | NM_001001547    | Hs.120949 | CD36        |
| 3.10E-02 | 3.01E-01 | -1.47 | 4.87E-03 | NM_001763       | Hs.1309   | CD1A        |
| 4.16E-02 | 1.88E-02 | -1.47 | 6.77E-03 | THC2678294      |           |             |
| 1.03E-01 | 8.40E-02 | 1.47  | 1.19E-04 | S67044          |           | CD36        |
| 7.01E-01 | 9.24E-02 | -1.47 | 5.57E-03 | NM_058186       | Hs.473877 | FAM3B       |
| 7.11E-02 | 2.37E-01 | 1.47  | 4.78E-02 | NM_002344       | Hs.434481 | LTK         |
| 1.84E-02 | 1.17E-02 | 1.46  | 4.03E-02 |                 |           |             |
| 2.47E-01 | 1.17E-02 | -1.46 | 3.57E-02 | NM_001040033    | Hs.443057 | CD53        |
| 1.48E-02 | 3.51E-02 | -1.46 | 4.77E-03 | NM_002001       | Hs.897    | FCER1A      |
| 7.08E-04 | 7.01E-02 | 1.46  | 2.18E-04 | NM_001444       | Hs.408061 | FABP5       |
| 1.84E-02 | 3.47E-02 | -1.46 | 9.28E-03 | NM_033554       | Hs.347270 | HLA-DPA1    |
| 4.92E-02 | 1.39E-03 | 1.46  | 1.12E-02 | THC2624901      |           |             |
| 5.43E-02 | 5.41E-02 | -1.46 | 1.10E-02 | BC106057        | Hs.534322 | HLA-DRB3    |
| 8.23E-03 | 8.90E-03 | 1.46  | 9.77E-03 | NM_170587       | Hs.368733 | RGS20       |
| 1.34E-02 | 8.31E-01 | -1.46 | 4.19E-03 | CR593388        | Hs.700704 |             |
| 4.70E-01 | 7.10E-02 | 1.45  | 1.92E-04 | NM_033059       | Hs.307015 | KRTAP4-11   |
| 1.57E-03 | 1.01E-01 | 1.45  | 3.07E-05 | NM_001444       | Hs.408061 | FABP5       |
| 2.41E-01 | 6.22E-01 | 1.45  | 2.10E-03 | BX537788        | Hs.658305 |             |
| 4.41E-01 | 9.30E-03 | -1.45 | 4.02E-03 | NM_175078       | Hs.334989 | KRT77       |
| 2.82E-01 | 2.93E-01 | -1.45 | 2.65E-02 | NM_001838       | Hs.370036 | CCR7        |
| 1.63E-02 | 3.28E-02 | 1.45  | 1.75E-02 | XR_018726       |           | LOC340888   |
| 1.65E-01 | 6.82E-02 | -1.45 | 5.03E-04 | NM_004288       | Hs.270    | PSCDBP      |
| 3.39E-04 | 3.55E-01 | -1.45 | 4.17E-02 | AW268902        | Hs.709761 |             |
| 1.43E-03 | 1.16E-02 | -1.45 | 6.07E-05 | NM_020650       | Hs.567550 | RCN3        |
| 1.47E-01 | 1.13E-02 | 1.45  | 1.85E-03 | XR_037365       |           | LOC10012925 |
| 3.66E-01 | 4.41E-01 | 1.45  | 4.21E-02 | AK093351        | Hs.297967 | FLJ36032    |
| 1.12E-01 | 5.36E-01 | -1.45 | 1.55E-02 | NM_005504       | Hs.438993 | BCAT1       |
| 9.26E-01 | 3.47E-01 | -1.45 | 8.02E-03 | NM_001080507    | Hs.671212 | OOEP        |
| 2.68E-02 | 1.89E-02 | 1.44  | 1.98E-02 | AK022489        |           | MYO1B       |
| 2.96E-01 | 2.96E-01 | -1.44 | 3.88E-03 | NM_019043       | Hs.310421 | APBB1IP     |
| 1.46E-02 | 4.25E-02 | 1.44  | 3.27E-04 | NM_198828       | Hs.595458 | MAST4       |
| 1.50E-01 | 5.23E-01 | -1.44 | 1.71E-02 | THC2650074      |           |             |
| 1.26E-01 | 7.67E-01 | -1.44 | 5.53E-03 | NM_032944       | Hs.309767 | STK31       |
| 1.21E-05 | 1.60E-02 | -1.44 | 2.97E-02 | NM_203339       | Hs.436657 | CLU         |
| 4.56E-02 | 4.99E-03 | 1.44  | 2.38E-04 | NM_014028       | Hs.226780 | OSTM1       |
| 9.07E-01 | 7.49E-01 | 1.44  | 3.59E-02 | NM_152908       | Hs.126830 | SLC47A2     |

|          |          |       |          |              |           |           |
|----------|----------|-------|----------|--------------|-----------|-----------|
| 1.48E-02 | 3.68E-02 | 1.44  | 2.23E-03 | BC014117     | Hs.520757 | TBXAS1    |
| 5.10E-03 | 1.46E-04 | 1.44  | 6.76E-04 | NM_175839    | Hs.433337 | SMOX      |
| 8.84E-04 | 5.36E-03 | -1.44 | 1.19E-02 | NM_001449    | Hs.435369 | FHL1      |
| 1.36E-01 | 1.74E-02 | -1.44 | 3.54E-03 | NR_001435    |           | HLA-DPB2  |
| 1.66E-02 | 2.87E-01 | 1.44  | 3.35E-04 | NM_012253    | Hs.102866 | TKTL1     |
| 2.10E-01 | 2.79E-01 | -1.44 | 4.99E-02 | AK124946     | Hs.162868 | DPF3      |
| 6.52E-01 | 2.32E-02 | -1.43 | 2.79E-02 | AK000992     | Hs.658833 |           |
| 2.85E-01 | 1.23E-01 | -1.43 | 1.10E-02 | NM_015717    | Hs.199731 | CD207     |
| 2.41E-03 | 7.04E-03 | 1.43  | 1.65E-02 | AK022479     | Hs.658520 |           |
| 9.50E-02 | 4.09E-01 | -1.43 | 9.26E-03 | NM_001025158 | Hs.709190 | CD74      |
| 2.51E-02 | 5.57E-02 | -1.43 | 1.36E-03 | NM_014737    | Hs.631504 | RASSF2    |
| 2.92E-03 | 1.76E-02 | -1.43 | 2.96E-02 | NM_005807    | Hs.647723 | PRG4      |
| 8.01E-01 | 2.96E-01 | -1.43 | 6.47E-03 | NM_001015880 | Hs.524491 | PAPSS2    |
| 3.23E-01 | 1.03E-01 | 1.43  | 3.23E-02 | NM_003101    | Hs.496383 | SOAT1     |
| 4.83E-01 | 8.39E-02 | -1.43 | 1.15E-03 | AJ002788     | Hs.460355 |           |
| 9.23E-04 | 7.03E-01 | 1.43  | 3.75E-02 | NM_032727    | Hs.500916 | INA       |
| 7.36E-03 | 3.11E-02 | 1.43  | 9.05E-03 |              |           |           |
| 4.33E-01 | 8.27E-03 | -1.42 | 2.10E-02 |              |           |           |
| 7.00E-01 | 2.61E-02 | 1.42  | 5.10E-03 | NM_207309    | Hs.142076 | UAP1L1    |
| 2.61E-02 | 2.05E-01 | 1.42  | 3.28E-02 | NM_018092    | Hs.444046 | NETO2     |
| 4.28E-01 | 7.22E-02 | -1.42 | 4.09E-05 | XM_933621    | Hs.355357 | LOC643669 |
| 1.09E-01 | 9.59E-01 | 1.42  | 1.42E-02 | NM_178557    | Hs.318529 | NAT8L     |
| 8.47E-01 | 6.69E-02 | -1.42 | 4.45E-03 | NM_033054    | Hs.37617  | MYO1G     |
| 3.14E-03 | 1.15E-01 | 1.42  | 4.48E-02 | NM_003812    | Hs.591643 | ADAM23    |
| 4.50E-02 | 3.31E-01 | 1.42  | 8.22E-06 | BC007360     | Hs.416379 | MGC16121  |
| 1.09E-01 | 3.11E-02 | 1.42  | 2.96E-02 | XR_018702    | Hs.647755 | LOC646446 |
| 1.91E-01 | 7.51E-03 | -1.42 | 1.37E-03 | NM_002110    | Hs.655210 | HCK       |
| 3.81E-02 | 3.34E-01 | -1.42 | 7.50E-04 | NM_014485    | Hs.128433 | PGDS      |
| 4.89E-01 | 2.74E-02 | 1.42  | 1.24E-03 | NM_005063    | Hs.558396 | SCD       |
| 1.31E-01 | 8.39E-01 | -1.41 | 4.96E-07 | NM_172174    | Hs.654378 | IL15      |
| 6.79E-02 | 8.04E-02 | -1.41 | 9.99E-03 | NM_002119    | Hs.631991 | HLA-DOA   |
| 9.28E-01 | 1.54E-02 | -1.41 | 6.47E-03 | NM_001803    | Hs.276770 | CD52      |
| 4.50E-03 | 5.38E-03 | 1.41  | 1.44E-02 | AL713773     | Hs.557850 | DENND2D   |
| 7.15E-02 | 3.05E-02 | 1.41  | 2.10E-02 | NM_002769    | Hs.709206 | PRSS1     |
| 8.58E-02 | 9.51E-03 | 1.41  | 1.41E-02 | NM_025243    | Hs.221597 | SLC19A3   |
| 2.60E-01 | 5.33E-03 | -1.41 | 1.28E-02 | NM_006120    | Hs.351279 | HLA-DMA   |
| 6.97E-02 | 6.75E-01 | -1.41 | 6.10E-04 |              |           |           |
| 2.18E-02 | 1.33E-01 | -1.41 | 5.91E-05 | NM_181523    | Hs.132225 | PIK3R1    |
| 5.42E-01 | 3.43E-02 | 1.41  | 9.36E-03 | NM_018140    | Hs.591741 | CEP72     |
| 2.05E-02 | 5.53E-01 | -1.41 | 6.81E-03 | NM_022469    | Hs.98206  | GREM2     |
| 2.79E-05 | 7.12E-02 | 1.41  | 7.72E-06 | NM_052926    | Hs.573567 | PNMA5     |
| 1.60E-03 | 2.84E-02 | -1.41 | 9.80E-03 | NM_001776    | Hs.576612 | ENTPD1    |
| 1.09E-01 | 2.65E-01 | -1.41 | 1.67E-05 | NM_004472    | Hs.519385 | FOXD1     |
| 1.05E-04 | 7.22E-03 | -1.41 | 1.30E-04 | NM_138444    | Hs.693617 | KCTD12    |
| 1.09E-01 | 5.42E-02 | -1.40 | 4.55E-02 | NM_033554    | Hs.347270 | HLA-DPA1  |
| 2.34E-03 | 4.52E-02 | 1.40  | 1.31E-02 | XR_037043    |           | LOC392335 |
| 1.55E-01 | 2.92E-01 | -1.40 | 2.72E-02 | NM_002125    | Hs.534322 | HLA-DRB5  |

|          |          |       |          |              |           |          |
|----------|----------|-------|----------|--------------|-----------|----------|
| 3.44E-01 | 7.12E-02 | -1.40 | 2.28E-03 | NM_001267    | Hs.97220  | CHAD     |
| 2.95E-01 | 5.23E-02 | -1.40 | 1.19E-02 | NM_005211    | Hs.654394 | CSF1R    |
| 2.49E-03 | 3.91E-03 | -1.40 | 6.97E-04 | NM_001312    | Hs.534309 | CRIP2    |
| 2.57E-01 | 4.55E-01 | 1.40  | 4.39E-02 | NM_013942    | Hs.42146  | PAX3     |
| 1.05E-04 | 8.64E-02 | 1.40  | 2.85E-03 | NM_025074    | Hs.369448 | FRAS1    |
| 8.40E-01 | 1.07E-01 | 1.40  | 6.16E-03 | NM_006834    | Hs.287714 | RAB32    |
| 2.93E-01 | 4.01E-03 | -1.40 | 8.05E-04 | BC033366     | Hs.334989 | KRT77    |
| 3.00E-01 | 3.95E-01 | -1.40 | 5.86E-04 | NM_005615    | Hs.23262  | RNASE6   |
| 3.91E-03 | 9.27E-02 | -1.40 | 7.46E-04 | NM_152436    | Hs.406728 | GLIPR1L2 |
| 1.10E-01 | 1.13E-03 | 1.40  | 2.31E-03 | BC037292     |           | FAM62C   |
| 5.58E-01 | 1.94E-02 | -1.40 | 6.51E-03 | AL522024     | Hs.381099 |          |
| 1.23E-01 | 2.59E-02 | 1.40  | 8.73E-03 | THC2485189   |           |          |
| 8.68E-01 | 3.99E-02 | -1.40 | 3.43E-03 | NM_003332    | Hs.515369 | TYROBP   |
| 1.30E-01 | 1.23E-01 | -1.40 | 2.21E-02 | NM_019111    | Hs.520048 | HLA-DRA  |
| 8.22E-01 | 2.01E-01 | -1.40 | 4.30E-05 | NM_001039396 | Hs.709459 | MPEG1    |
| 1.16E-03 | 1.31E-02 | 1.40  | 4.25E-03 | NM_004505    | Hs.448851 | USP6     |
| 6.21E-01 | 1.85E-01 | -1.40 | 6.84E-03 | NM_001009568 | Hs.123659 | SMPDL3B  |
| 2.04E-01 | 5.01E-01 | 1.39  | 1.19E-02 | NM_001102566 | Hs.433150 | PCP4L1   |
| 8.95E-01 | 3.09E-01 | -1.39 | 3.76E-02 | NM_000559    | Hs.705371 | HBG1     |
| 8.88E-01 | 4.58E-01 | 1.39  | 4.39E-03 | NM_003918    | Hs.567381 | GYG2     |
| 1.66E-02 | 7.94E-02 | -1.39 | 8.05E-04 | NM_002736    | Hs.433068 | PRKAR2B  |
| 5.74E-01 | 9.35E-03 | 1.39  | 2.08E-02 | NM_012157    | Hs.475872 | FBXL2    |
| 7.89E-01 | 3.37E-04 | -1.39 | 3.47E-02 |              |           |          |
| 4.43E-04 | 5.47E-01 | -1.39 | 3.49E-03 | NM_003613    | Hs.442180 | CILP     |
| 1.68E-01 | 1.41E-01 | 1.39  | 9.42E-05 | NM_153347    | Hs.502100 | TMEM86A  |
| 5.47E-02 | 8.67E-01 | 1.39  | 1.60E-02 | NM_013347    | Hs.659349 | RPA4     |
| 7.54E-01 | 1.43E-02 | -1.39 | 4.40E-03 | AL117630     | Hs.655683 | FAM153B  |
| 7.08E-04 | 6.84E-02 | -1.39 | 2.79E-02 | NM_002404    | Hs.296049 | MFAP4    |
| 4.63E-01 | 4.25E-01 | 1.39  | 3.91E-02 | NM_014241    | Hs.114062 | PTPLA    |
| 3.03E-02 | 8.63E-01 | -1.39 | 3.70E-03 | NM_173800    | Hs.98288  | FLJ90650 |
| 1.43E-02 | 9.98E-01 | 1.38  | 4.67E-02 | NM_144957    | Hs.72026  | PRSS21   |
| 1.94E-01 | 1.10E-01 | 1.38  | 4.12E-02 | AX721195     | Hs.166262 |          |
| 7.44E-01 | 1.71E-01 | -1.38 | 2.59E-02 | NM_003890    | Hs.111732 | FCGBP    |
| 9.82E-05 | 3.09E-01 | -1.38 | 9.74E-04 | NM_005909    | Hs.637017 | MAP1B    |
| 1.14E-03 | 3.40E-03 | -1.38 | 5.83E-06 | NM_014719    | Hs.406492 | FAM115A  |
| 3.40E-01 | 2.02E-01 | -1.38 | 7.77E-03 | AK091508     |           |          |
| 1.82E-01 | 3.13E-03 | 1.38  | 3.01E-02 | NM_001030005 | Hs.187694 | CPLX3    |
| 1.10E-01 | 9.71E-01 | -1.38 | 2.23E-05 | NM_002867    | Hs.123072 | RAB3B    |
| 3.46E-02 | 4.66E-01 | 1.38  | 2.48E-03 | NM_025049    | Hs.112160 | PIF1     |
| 9.06E-05 | 1.35E-01 | 1.38  | 5.68E-04 | NM_182639    | Hs.404568 | HPS1     |
| 6.81E-01 | 1.59E-02 | -1.38 | 3.59E-02 | NM_001040619 | Hs.460    | ATF3     |
| 5.66E-03 | 3.50E-02 | 1.38  | 1.22E-02 | AK130099     | Hs.235795 |          |
| 8.19E-03 | 9.12E-02 | 1.38  | 1.13E-05 | AK090910     | Hs.44227  |          |
| 7.12E-04 | 5.33E-02 | 1.38  | 1.37E-02 | NM_198562    | Hs.403828 | C3orf62  |
| 2.20E-01 | 6.47E-01 | -1.38 | 2.88E-02 | M27126       | Hs.705372 |          |
| 1.61E-03 | 7.21E-03 | 1.38  | 3.19E-02 | NM_003568    | Hs.708113 | ANXA9    |
| 3.54E-03 | 4.90E-01 | 1.38  | 4.37E-02 | THC2676186   |           |          |



|          |          |       |          |                 |           |             |
|----------|----------|-------|----------|-----------------|-----------|-------------|
| 7.84E-01 | 4.30E-01 | -1.38 | 3.96E-02 | NM_024575       | Hs.709522 | TNFAIP8L2   |
| 1.23E-03 | 6.02E-03 | 1.38  | 4.40E-02 | THC2677780      |           |             |
| 8.85E-01 | 1.17E-01 | -1.38 | 3.31E-07 | NM_033054       | Hs.37617  | MYO1G       |
| 8.03E-03 | 3.65E-01 | 1.38  | 4.40E-02 | NM_007000       | Hs.159309 | UPK1A       |
| 2.58E-01 | 3.26E-02 | -1.38 | 1.03E-06 | ENST00000353323 | Hs.661576 |             |
| 4.75E-02 | 1.43E-02 | -1.37 | 1.25E-02 | NM_006120       | Hs.351279 | HLA-DMA     |
| 4.87E-02 | 8.62E-01 | -1.37 | 2.35E-05 | AK001062        | Hs.522928 |             |
| 9.34E-03 | 2.25E-03 | 1.37  | 1.43E-07 | NM_020974       | Hs.523468 | SCUBE2      |
| 2.76E-01 | 7.39E-01 | -1.37 | 1.23E-04 | NM_005849       | Hs.530902 | IGSF6       |
| 1.86E-01 | 1.63E-01 | 1.37  | 4.41E-02 | M14087          | Hs.701974 |             |
| 1.56E-02 | 2.02E-02 | 1.37  | 9.16E-04 | NM_003834       | Hs.65756  | RGS11       |
| 9.03E-01 | 1.15E-02 | -1.37 | 2.20E-04 | AB018295        | Hs.627298 | FAM153A     |
| 7.78E-02 | 6.17E-02 | 1.37  | 4.03E-06 | EL953211        | Hs.672859 |             |
| 9.26E-02 | 1.10E-03 | -1.37 | 3.33E-03 | NM_052880       | Hs.26670  | PIK3IP1     |
| 4.57E-01 | 3.76E-03 | -1.37 | 2.57E-03 | NM_004040       | Hs.502876 | RHOB        |
| 1.04E-01 | 1.89E-02 | -1.37 | 1.63E-02 | NM_006762       | Hs.371021 | LAPTM5      |
| 1.96E-01 | 8.86E-01 | 1.37  | 9.96E-05 | AK124806        | Hs.34871  | LOC10012882 |
| 2.35E-03 | 6.92E-01 | -1.37 | 2.12E-02 | NM_030751       | Hs.124503 | ZEB1        |
| 5.31E-01 | 5.84E-02 | 1.37  | 4.23E-03 | AF132203        | Hs.597496 | PRO1933     |
| 1.23E-02 | 4.29E-01 | -1.37 | 9.10E-03 | NM_144658       | Hs.368203 | DOCK11      |
| 5.67E-01 | 1.77E-03 | -1.37 | 3.89E-04 | NM_172099       | Hs.405667 | CD8B        |
| 3.76E-01 | 3.45E-01 | -1.37 | 4.06E-02 | NM_019043       | Hs.310421 | APBB1IP     |
| 1.33E-01 | 1.60E-01 | -1.37 | 7.10E-03 | NM_033130       | Hs.284813 | SIGLEC10    |
| 1.76E-01 | 2.57E-01 | 1.37  | 7.27E-03 | NM_203391       | Hs.1466   | GK          |
| 1.29E-01 | 1.27E-02 | 1.37  | 6.46E-04 | AK092668        | Hs.483238 |             |
| 1.20E-01 | 1.75E-01 | 1.37  | 1.83E-03 | NM_002386       | Hs.513829 | MC1R        |
| 3.44E-04 | 7.33E-02 | -1.36 | 1.89E-04 | NM_006329       | Hs.332708 | FBLN5       |
| 5.93E-02 | 1.62E-02 | -1.36 | 4.28E-06 | NM_182826       | Hs.128856 | SCARA3      |
| 1.16E-01 | 4.21E-01 | 1.36  | 9.22E-03 | NM_003636       | Hs.440497 | KCNAB2      |
| 4.30E-01 | 8.61E-01 | 1.36  | 4.05E-02 | NM_152996       | Hs.337040 | ST6GALNAC3  |
| 1.82E-01 | 8.90E-03 | -1.36 | 1.68E-03 | NM_006202       | Hs.89901  | PDE4A       |
| 2.10E-02 | 1.43E-01 | -1.36 | 4.36E-05 | NM_001038633    | Hs.135015 | RSPO1       |
| 1.83E-04 | 1.90E-01 | -1.36 | 4.85E-03 | NM_004791       | Hs.696554 | ITGBL1      |
| 4.04E-02 | 3.72E-02 | -1.36 | 1.31E-05 | BC033331        | Hs.606162 |             |
| 9.48E-04 | 2.31E-03 | 1.36  | 2.92E-02 | THC2744561      |           |             |
| 1.23E-01 | 5.34E-02 | 1.36  | 3.53E-03 | NM_138461       | Hs.710321 | TM4SF19     |
| 4.36E-04 | 4.77E-02 | 1.36  | 2.24E-02 | NM_138788       | Hs.504301 | TMEM45B     |
| 1.04E-02 | 5.58E-01 | -1.36 | 1.18E-02 |                 |           |             |
| 1.83E-01 | 2.95E-02 | 1.36  | 3.82E-02 | BC012036        | Hs.680381 |             |
| 1.79E-02 | 2.64E-03 | 1.36  | 3.77E-02 | NM_001007125    | Hs.570316 | LOC198437   |
| 2.67E-02 | 4.07E-02 | -1.36 | 2.45E-03 | ENST00000361227 | Hs.631492 | ND3         |
| 1.28E-04 | 6.30E-02 | 1.36  | 6.68E-03 | NM_017947       | Hs.405028 | MOCOS       |
| 7.68E-04 | 8.02E-01 | -1.36 | 2.69E-02 | NM_006207       | Hs.458573 | PDGFRL      |
| 6.33E-01 | 1.39E-01 | -1.36 | 8.79E-03 | NM_020125       | Hs.438683 | SLAMF8      |
| 6.56E-03 | 2.68E-01 | -1.36 | 3.72E-03 | NM_012395       | Hs.430742 | PFTK1       |
| 4.71E-01 | 2.62E-02 | -1.36 | 3.24E-02 | BC038749        | Hs.664957 |             |
| 9.64E-01 | 4.10E-01 | -1.36 | 2.14E-02 | NM_006291       | Hs.525607 | TNFAIP2     |

|          |          |       |          |                 |           |           |
|----------|----------|-------|----------|-----------------|-----------|-----------|
| 5.34E-01 | 3.56E-03 | -1.36 | 3.78E-04 | AL833294        | Hs.655519 | SYNPO2    |
| 2.58E-01 | 8.50E-02 | 1.36  | 2.05E-02 | NM_020777       | Hs.479099 | SORCS2    |
| 6.67E-03 | 1.73E-01 | -1.36 | 2.64E-03 | NM_016084       | Hs.25829  | RASD1     |
| 5.16E-01 | 4.44E-01 | 1.36  | 1.69E-02 | THC2732746      |           |           |
| 9.09E-04 | 9.61E-03 | 1.36  | 9.60E-03 | AK022255        |           | C8orf60   |
| 1.68E-01 | 7.56E-01 | -1.36 | 4.03E-03 | NM_001039396    | Hs.709459 | MPEG1     |
| 6.21E-01 | 1.23E-01 | -1.36 | 1.62E-02 | NM_001122965    | Hs.376144 | RPTN      |
| 5.06E-01 | 3.18E-01 | 1.36  | 5.69E-03 | NM_002386       | Hs.513829 | MC1R      |
| 5.78E-02 | 2.69E-01 | -1.36 | 2.38E-06 | NM_001002811    | Hs.654651 | PDE4DIP   |
| 1.18E-03 | 4.33E-01 | -1.36 | 3.74E-03 | NM_004560       | Hs.98255  | ROR2      |
| 4.54E-02 | 1.66E-02 | 1.36  | 9.34E-03 | NM_022910       | Hs.322430 | NDRG4     |
| 3.69E-01 | 1.08E-01 | -1.36 | 5.98E-03 | L34088          | Hs.387679 | HLA-DQA1  |
| 4.43E-01 | 3.64E-03 | 1.35  | 2.64E-02 | AF086547        | Hs.418279 |           |
| 2.08E-01 | 2.40E-01 | 1.35  | 5.06E-05 | NM_005883       | Hs.446376 | APC2      |
| 5.67E-01 | 6.92E-02 | -1.35 | 1.03E-02 | NM_005892       | Hs.100217 | FMNL1     |
| 9.49E-01 | 2.68E-01 | -1.35 | 4.74E-02 | THC2657355      |           |           |
| 8.08E-01 | 3.08E-01 | -1.35 | 3.78E-03 | NM_181644       | Hs.567714 | MFSD4     |
| 1.74E-01 | 2.36E-04 | 1.35  | 2.79E-02 | THC2685559      |           |           |
| 1.41E-01 | 2.14E-02 | 1.35  | 1.57E-03 | NM_014907       | Hs.163990 | FRMPD1    |
| 3.45E-01 | 1.50E-02 | 1.35  | 6.21E-04 | ENST00000312734 | Hs.8373   |           |
| 4.56E-01 | 4.56E-03 | 1.35  | 2.76E-03 | NM_017983       | Hs.463964 | WIPI1     |
| 2.50E-01 | 7.02E-01 | -1.35 | 1.71E-02 | NM_001252       | Hs.501497 | CD70      |
| 8.10E-01 | 2.74E-01 | -1.35 | 1.22E-02 | NM_007237       | Hs.632549 | SP140     |
| 8.80E-02 | 8.85E-02 | -1.35 | 8.33E-03 | NM_152748       | Hs.208093 | KIAA1324L |
| 3.96E-03 | 2.88E-01 | 1.35  | 4.60E-05 |                 |           |           |
| 4.72E-02 | 4.55E-03 | 1.35  | 2.37E-02 | NM_201520       | Hs.118918 | SLC25A35  |
| 3.80E-01 | 1.96E-03 | -1.35 | 1.69E-02 | BC022385        | Hs.390599 | LOC440335 |
| 1.74E-02 | 2.28E-01 | -1.35 | 1.40E-09 | NM_023926       | Hs.235390 | ZSCAN18   |
| 2.04E-03 | 3.11E-01 | -1.35 | 5.39E-03 |                 |           |           |
| 8.07E-01 | 5.09E-01 | 1.35  | 2.29E-02 | BC008001        | Hs.639447 |           |
| 1.88E-01 | 1.61E-01 | -1.35 | 1.59E-03 | NM_005985       | Hs.48029  | SNAI1     |
| 3.44E-01 | 2.09E-01 | 1.35  | 1.15E-02 | NM_014862       | Hs.459070 | ARNT2     |
| 7.83E-01 | 3.45E-01 | -1.35 | 1.31E-02 | NM_003063       | Hs.334629 | SLN       |
| 1.33E-01 | 1.30E-01 | 1.35  | 6.28E-04 | NM_002534       | Hs.524760 | OAS1      |
| 9.51E-01 | 5.50E-01 | -1.35 | 3.19E-02 | NM_006495       | Hs.5509   | EVI2B     |
| 3.91E-01 | 2.10E-01 | -1.34 | 3.39E-03 | THC2588113      |           |           |
| 2.80E-03 | 7.01E-02 | 1.34  | 7.05E-05 | NM_144765       | Hs.116651 | MPZL2     |
| 5.92E-03 | 3.40E-01 | -1.34 | 2.95E-06 | NM_053001       | Hs.253247 | OSR2      |
| 8.76E-01 | 1.62E-01 | 1.34  | 2.50E-02 | ENST00000381826 | Hs.271721 | GDNF      |
| 5.45E-01 | 8.55E-02 | -1.34 | 1.20E-02 | NM_002298       | Hs.381099 | LCP1      |
| 3.98E-02 | 1.82E-02 | -1.34 | 1.80E-04 | NM_005822       | Hs.440168 | RCAN2     |
| 8.49E-01 | 3.32E-01 | -1.34 | 3.86E-02 | NM_002664       | Hs.468840 | PLEK      |
| 5.88E-01 | 3.16E-01 | -1.34 | 9.41E-03 | NM_003120       | Hs.502511 | SPI1      |
| 4.08E-01 | 2.95E-02 | -1.34 | 4.07E-04 | NM_003446       | Hs.89897  | ZNF157    |
| 4.11E-01 | 2.48E-02 | -1.34 | 1.75E-02 | NM_006290       | Hs.591338 | TNFAIP3   |
| 6.66E-01 | 1.18E-02 | -1.34 | 1.67E-05 | NM_002738       | Hs.460355 | PRKCB1    |
| 2.67E-01 | 6.53E-01 | -1.34 | 1.11E-05 | BQ706262        | Hs.536218 |           |

|          |          |       |          |                 |           |           |
|----------|----------|-------|----------|-----------------|-----------|-----------|
| 1.42E-01 | 2.00E-02 | 1.34  | 1.13E-07 | NM_024051       | Hs.530024 | C7orf24   |
| 3.72E-01 | 6.38E-02 | 1.34  | 4.68E-03 | NM_031439       | Hs.709543 | SOX7      |
| 7.65E-01 | 1.65E-01 | -1.34 | 5.82E-03 | U39657          | Hs.463978 | MAP2K6    |
| 2.56E-02 | 1.29E-02 | 1.34  | 6.31E-03 | NM_002959       | Hs.485195 | SORT1     |
| 1.81E-03 | 4.60E-01 | -1.34 | 2.06E-02 | ENST00000361789 | Hs.631491 | CYTB      |
| 8.61E-02 | 3.01E-03 | 1.34  | 3.07E-02 | NM_182553       | Hs.437072 | CNIH2     |
| 8.82E-03 | 6.97E-02 | 1.34  | 4.45E-03 | NM_003383       | Hs.370422 | VLDLR     |
| 3.98E-01 | 1.90E-01 | 1.34  | 7.77E-03 | NM_000922       | Hs.656437 | PDE3B     |
| 3.24E-01 | 2.27E-02 | -1.34 | 2.41E-02 | NM_002118       | Hs.654428 | HLA-DMB   |
| 2.78E-03 | 5.06E-02 | -1.34 | 2.18E-05 | NM_152380       | Hs.146196 | TBX15     |
| 4.53E-01 | 2.65E-01 | -1.34 | 6.43E-03 | NM_006639       | Hs.201300 | CYSLTR1   |
| 1.93E-01 | 2.55E-01 | 1.34  | 4.76E-02 | NM_181535       | Hs.59736  | KRT28     |
| 1.52E-02 | 5.58E-01 | -1.34 | 2.13E-03 | NM_005609       | Hs.154084 | PYGM      |
| 2.02E-02 | 3.73E-01 | -1.34 | 1.85E-05 | NM_005076       | Hs.519220 | CNTN2     |
| 2.28E-01 | 1.48E-01 | 1.34  | 3.81E-05 | NM_173681       | Hs.647092 | ATG9B     |
| 3.57E-01 | 3.24E-03 | 1.34  | 5.54E-03 | NM_000908       | Hs.237028 | NPR3      |
| 1.89E-01 | 6.95E-02 | -1.34 | 9.92E-03 | NM_001554       | Hs.8867   | CYR61     |
| 1.29E-03 | 3.36E-02 | -1.34 | 2.51E-02 | NM_001454       | Hs.651204 | FOXJ1     |
| 4.63E-01 | 4.62E-01 | -1.34 | 2.19E-02 | NM_172249       | Hs.520937 | CSF2RA    |
| 3.82E-01 | 5.86E-01 | -1.34 | 7.98E-03 | NM_002072       | Hs.269782 | GNAQ      |
| 7.87E-03 | 2.66E-01 | 1.34  | 1.67E-03 | NM_005987       | Hs.46320  | SPRR1A    |
| 1.88E-03 | 4.03E-02 | 1.34  | 1.81E-02 |                 |           |           |
| 7.10E-03 | 4.08E-02 | -1.34 | 6.45E-03 | AK024399        | Hs.505141 |           |
| 5.13E-03 | 1.77E-03 | 1.33  | 2.19E-02 | NM_025225       | Hs.654800 | PNPLA3    |
| 6.74E-02 | 9.06E-03 | 1.33  | 6.51E-04 | NM_000908       | Hs.237028 | NPR3      |
| 1.35E-02 | 5.87E-03 | 1.33  | 4.94E-02 | NM_019618       | Hs.211238 | IL1F9     |
| 2.86E-01 | 1.14E-02 | 1.33  | 4.17E-02 | BI910665        | Hs.137007 |           |
| 8.44E-01 | 1.62E-01 | -1.33 | 5.79E-04 | NM_033468       | Hs.283900 | ZNF257    |
| 6.01E-03 | 1.47E-02 | 1.33  | 8.32E-03 | NM_031439       | Hs.709543 | SOX7      |
| 5.21E-04 | 2.43E-02 | 1.33  | 3.18E-02 | AF095737        | Hs.198003 | SARDH     |
| 4.72E-02 | 1.69E-03 | -1.33 | 1.12E-02 | AK097322        | Hs.631498 |           |
| 6.12E-03 | 7.84E-03 | -1.33 | 8.84E-05 | NM_020405       | Hs.125036 | PLXDC1    |
| 1.21E-02 | 1.07E-01 | -1.33 | 1.99E-02 | NM_144966       | Hs.709555 | FREM1     |
| 1.82E-02 | 3.61E-01 | 1.33  | 8.95E-03 | NM_001123225    |           | LOC644186 |
| 5.48E-03 | 9.02E-01 | 1.33  | 1.22E-02 | NM_018984       | Hs.199763 | SSH1      |
| 9.91E-04 | 2.50E-02 | -1.33 | 2.17E-02 | NM_001034841    | Hs.648523 | LOC162073 |
| 6.38E-01 | 5.49E-02 | -1.33 | 1.72E-03 | BC038371        | Hs.657602 |           |
| 2.07E-02 | 1.59E-01 | -1.33 | 3.51E-06 | NM_014988       | Hs.335163 | LIMCH1    |
| 5.34E-03 | 8.86E-02 | 1.33  | 1.06E-03 | NM_001018053    | Hs.282702 | PFKFB2    |
| 1.10E-01 | 2.45E-01 | -1.33 | 4.03E-09 | NM_144722       | Hs.298863 | SPEF2     |
| 1.52E-02 | 8.92E-03 | 1.33  | 1.34E-09 | NM_182728       | Hs.632348 | SLC7A8    |
| 7.52E-03 | 5.33E-01 | 1.33  | 2.50E-05 | NM_198173       | Hs.657920 | GRHL3     |
| 1.38E-01 | 2.91E-01 | -1.33 | 8.12E-05 | NM_004923       | Hs.145932 | MTL5      |
| 4.29E-03 | 7.96E-02 | -1.33 | 6.54E-05 | NM_153635       | Hs.121335 | CPNE9     |
| 5.70E-02 | 3.04E-02 | 1.33  | 3.04E-03 | NM_030899       | Hs.656413 | ZNF323    |
| 2.03E-01 | 6.89E-02 | -1.33 | 1.18E-02 | NM_001554       | Hs.8867   | CYR61     |
| 2.06E-03 | 1.73E-01 | -1.33 | 1.26E-05 | NM_152989       | Hs.657542 | SOX5      |

|          |          |       |          |                 |           |             |
|----------|----------|-------|----------|-----------------|-----------|-------------|
| 4.43E-01 | 2.23E-02 | -1.33 | 4.77E-02 | NM_032413       | Hs.112242 | C15orf48    |
| 3.18E-02 | 4.50E-02 | 1.33  | 1.14E-03 | X91906          | Hs.166486 | CLCN5       |
| 2.73E-03 | 5.18E-01 | 1.33  | 2.15E-04 | NM_005073       | Hs.436893 | SLC15A1     |
| 4.92E-02 | 1.61E-03 | -1.33 | 7.26E-03 | AK098143        | Hs.192155 | LOC283861   |
| 1.57E-01 | 6.37E-02 | -1.33 | 4.87E-03 | NM_018938       | Hs.591250 | PCDHB4      |
| 5.08E-01 | 1.80E-02 | 1.33  | 1.23E-02 | NM_033300       | Hs.576154 | LRP8        |
| 4.48E-03 | 2.27E-02 | 1.33  | 1.42E-02 | AF161533        | Hs.525088 | CCDC82      |
| 1.08E-03 | 4.06E-01 | 1.33  | 9.12E-06 | BC024020        | Hs.708260 | TMEM49      |
| 9.50E-01 | 8.30E-01 | 1.33  | 5.94E-03 | NM_000166       | Hs.333303 | GJB1        |
| 2.86E-01 | 3.13E-01 | 1.32  | 6.79E-03 | NM_020704       | Hs.489988 | FAM40B      |
| 9.83E-04 | 5.59E-01 | -1.32 | 6.01E-03 | NM_004098       | Hs.202095 | EMX2        |
| 1.80E-03 | 3.21E-03 | 1.32  | 2.17E-02 | AK124173        | Hs.598050 | LOC10013047 |
| 2.92E-01 | 1.03E-02 | 1.32  | 4.81E-03 | AK021906        | Hs.658795 |             |
| 3.93E-02 | 1.45E-02 | 1.32  | 4.66E-04 | NM_016354       | Hs.235782 | SLCO4A1     |
| 2.57E-02 | 7.90E-01 | -1.32 | 2.24E-02 | NM_012395       | Hs.430742 | PFTK1       |
| 6.52E-01 | 3.87E-02 | -1.32 | 1.71E-02 | AW952039        | Hs.654803 |             |
| 1.49E-02 | 4.92E-03 | 1.32  | 1.19E-03 | NM_000623       | Hs.654542 | BDKRB2      |
| 1.24E-02 | 3.59E-02 | 1.32  | 3.92E-03 | BF063428        | Hs.546239 |             |
| 1.35E-02 | 2.76E-03 | -1.32 | 5.14E-05 | NM_173632       | Hs.109540 | ZNF776      |
| 7.22E-02 | 4.89E-02 | 1.32  | 3.55E-02 |                 |           |             |
| 3.93E-02 | 1.59E-01 | 1.32  | 4.52E-06 | THC2655140      |           |             |
| 1.57E-05 | 2.59E-03 | 1.32  | 3.43E-02 | NM_000359       | Hs.508950 | TGM1        |
| 1.64E-01 | 9.78E-02 | 1.32  | 1.18E-04 | NM_018302       | Hs.107527 | C4orf19     |
| 1.17E-01 | 9.59E-03 | -1.32 | 3.50E-02 | AF212044        |           |             |
| 4.74E-01 | 6.88E-01 | -1.32 | 3.95E-02 | NM_001045556    | Hs.75367  | SLA         |
| 7.78E-01 | 6.74E-01 | -1.32 | 9.13E-04 | NM_000878       | Hs.474787 | IL2RB       |
| 2.01E-02 | 2.49E-02 | 1.32  | 7.07E-05 | NM_018941       | Hs.127675 | CLN8        |
| 1.58E-02 | 3.78E-01 | -1.32 | 1.82E-04 | NM_001150       | Hs.1239   | ANPEP       |
| 1.06E-01 | 5.07E-02 | 1.32  | 3.72E-02 | NM_177483       | Hs.591810 | GPLD1       |
| 1.49E-02 | 4.61E-02 | 1.32  | 2.71E-02 | NM_006665       | Hs.44227  | HPSE        |
| 7.71E-02 | 1.40E-01 | 1.32  | 2.07E-03 | NM_003459       | Hs.467981 | SLC30A3     |
| 2.55E-01 | 1.65E-02 | 1.32  | 1.05E-04 | ENST00000312734 | Hs.8373   |             |
| 7.64E-02 | 8.85E-01 | 1.32  | 3.38E-02 | NM_002964       | Hs.416073 | S100A8      |
| 3.66E-03 | 3.44E-01 | -1.32 | 1.84E-02 | NM_000129       | Hs.335513 | F13A1       |
| 3.74E-01 | 6.79E-03 | -1.32 | 3.33E-04 | NM_053056       | Hs.523852 | CCND1       |
| 2.48E-04 | 7.54E-01 | -1.32 | 1.64E-04 | NM_175571       | Hs.647121 | GIMAP8      |
| 5.73E-01 | 2.20E-01 | -1.32 | 5.28E-04 | NM_002738       | Hs.460355 | PRKCB1      |
| 7.82E-01 | 9.55E-03 | -1.32 | 3.19E-02 | NM_005855       | Hs.471783 | RAMP1       |
| 6.52E-01 | 6.68E-01 | -1.32 | 1.78E-03 | NM_175881       | Hs.144348 | ODF3L1      |
| 4.52E-03 | 1.64E-02 | -1.32 | 2.34E-02 |                 |           |             |
| 3.57E-01 | 4.74E-03 | 1.32  | 1.03E-03 | AL355688        | Hs.655029 |             |
| 7.12E-01 | 3.02E-02 | -1.32 | 3.79E-03 | NM_005428       | Hs.116237 | VAV1        |
| 4.45E-01 | 5.83E-03 | -1.32 | 6.31E-05 | NM_032011       | Hs.368160 | PCDHGA3     |
| 9.86E-01 | 3.15E-01 | 1.32  | 1.67E-02 | NM_006834       | Hs.287714 | RAB32       |
| 7.75E-01 | 5.92E-01 | -1.31 | 1.18E-02 | NM_024320       | Hs.368260 | ATAD4       |
| 5.96E-03 | 4.47E-02 | 1.31  | 2.69E-02 | AK022348        | Hs.369657 | SPATA5L1    |
| 3.77E-01 | 2.58E-02 | 1.31  | 9.49E-04 | AF086071        | Hs.197962 |             |

|          |          |       |          |              |           |           |
|----------|----------|-------|----------|--------------|-----------|-----------|
| 2.09E-02 | 2.91E-02 | 1.31  | 3.34E-03 |              |           |           |
| 2.30E-01 | 1.57E-03 | 1.31  | 6.27E-06 | NM_207627    | Hs.124649 | ABCG1     |
| 3.14E-01 | 1.22E-01 | -1.31 | 1.26E-02 | BE926212     |           |           |
| 7.76E-04 | 7.15E-02 | 1.31  | 4.96E-02 | NM_002770    | Hs.622865 | PRSS2     |
| 9.13E-01 | 3.25E-01 | -1.31 | 2.87E-02 | CB959193     | Hs.97644  |           |
| 3.43E-01 | 3.41E-02 | 1.31  | 3.07E-03 | NM_005505    | Hs.709216 | SCARB1    |
| 6.72E-02 | 6.24E-02 | 1.31  | 8.10E-05 | AK090639     | Hs.13349  | NFASC     |
| 3.79E-02 | 1.02E-01 | -1.31 | 7.71E-03 | NM_001337    | Hs.78913  | CX3CR1    |
| 5.38E-02 | 1.62E-01 | 1.31  | 1.26E-04 | AB002454     | Hs.106242 | CYP4F3    |
| 4.43E-01 | 3.42E-02 | -1.31 | 4.27E-03 | NM_001037582 | Hs.379191 | SCD5      |
| 4.90E-01 | 9.82E-03 | 1.31  | 3.71E-02 | NM_001039395 | Hs.179615 | C9orf68   |
| 5.77E-02 | 2.03E-02 | -1.31 | 1.20E-02 | NM_007034    | Hs.13852  | DNAJB4    |
| 3.80E-01 | 7.65E-02 | -1.31 | 2.39E-02 | N34499       | Hs.655670 |           |
| 2.61E-02 | 1.62E-02 | -1.31 | 5.21E-04 | NM_004079    | Hs.181301 | CTSS      |
| 5.70E-01 | 7.24E-01 | 1.31  | 4.13E-02 | NM_004265    | Hs.502745 | FADS2     |
| 1.44E-03 | 1.03E-02 | -1.31 | 3.30E-06 | NM_025004    | Hs.287555 | CCDC15    |
| 7.38E-02 | 6.45E-02 | 1.31  | 4.68E-02 | CD239706     | Hs.688414 |           |
| 7.32E-02 | 2.48E-01 | -1.31 | 4.85E-03 | AL833309     | Hs.622596 |           |
| 2.48E-02 | 8.34E-01 | 1.31  | 1.46E-02 | NM_033229    | Hs.591789 | TRIM15    |
| 6.90E-03 | 8.69E-01 | 1.31  | 1.19E-05 | L33930       | Hs.694721 | CD24      |
| 4.64E-02 | 4.37E-01 | 1.31  | 3.38E-03 | NM_005553    | Hs.709220 | KRTAP5-9  |
| 8.00E-02 | 2.52E-01 | 1.31  | 7.94E-04 | NM_003842    | Hs.521456 | TNFRSF10B |
| 7.98E-04 | 1.52E-01 | -1.31 | 2.57E-02 | NM_000362    | Hs.701968 | TIMP3     |
| 3.44E-02 | 9.66E-01 | -1.31 | 2.94E-04 | NM_016952    | Hs.38034  | CDON      |
| 2.05E-01 | 6.30E-01 | -1.31 | 6.60E-03 | NM_181723    | Hs.403594 | EFHA2     |
| 6.34E-01 | 1.19E-01 | 1.31  | 2.15E-02 | NM_016363    | Hs.661752 | GP6       |
| 5.99E-02 | 1.74E-01 | -1.31 | 2.85E-02 | NM_004522    | Hs.660699 | KIF5C     |
| 3.76E-01 | 6.95E-01 | 1.31  | 5.64E-05 | NM_001007595 | Hs.144372 | FAM148B   |
| 1.85E-01 | 1.69E-02 | 1.31  | 1.31E-02 |              |           |           |
| 6.66E-01 | 7.39E-02 | -1.31 | 2.55E-02 |              |           |           |
| 2.17E-02 | 9.60E-03 | -1.31 | 1.58E-02 | NM_007034    | Hs.13852  | DNAJB4    |
| 6.15E-01 | 2.76E-02 | -1.31 | 1.03E-04 | NM_001627    | Hs.591293 | ALCAM     |
| 1.17E-01 | 2.00E-01 | -1.31 | 2.18E-04 | NM_138731    | Hs.660396 | MIPOL1    |
| 6.86E-01 | 1.45E-02 | 1.31  | 3.57E-03 | NM_023112    | Hs.278815 | OTUB2     |
| 4.42E-03 | 1.19E-01 | -1.30 | 5.27E-03 | THC2540738   |           |           |
| 9.59E-01 | 4.75E-02 | -1.30 | 9.59E-03 | NM_002985    | Hs.514821 | CCL5      |
| 4.45E-03 | 3.05E-01 | -1.30 | 4.22E-02 | NM_005725    | Hs.310458 | TSPAN2    |
| 6.73E-03 | 9.80E-03 | 1.30  | 7.65E-04 | NM_014028    | Hs.226780 | OSTM1     |
| 4.75E-01 | 1.05E-01 | 1.30  | 1.88E-02 |              |           |           |
| 9.64E-01 | 5.79E-01 | 1.30  | 1.72E-04 | NM_052899    | Hs.150549 | GPRIN1    |
| 2.64E-01 | 2.98E-02 | 1.30  | 8.84E-03 | NM_025015    | Hs.654682 | HSPA12A   |
| 5.85E-02 | 2.21E-02 | 1.30  | 2.00E-02 | AK092987     | Hs.705482 | ARV1      |
| 1.66E-02 | 3.96E-04 | -1.30 | 5.91E-03 | NM_183422    | Hs.507916 | TSC22D1   |
| 1.82E-02 | 4.41E-01 | -1.30 | 3.02E-02 | NM_033402    | Hs.193115 | LRRCC1    |
| 4.82E-01 | 5.61E-01 | -1.30 | 2.53E-05 | NM_001289    | Hs.655445 | CLIC2     |
| 3.44E-03 | 7.43E-02 | -1.30 | 7.38E-07 | THC2691142   |           |           |
| 3.17E-04 | 4.24E-01 | 1.30  | 2.36E-03 | AF256215     |           | ARNTL2    |

|          |          |       |          |                 |           |             |
|----------|----------|-------|----------|-----------------|-----------|-------------|
| 5.46E-01 | 1.71E-01 | 1.30  | 5.95E-03 | AW993939        | Hs.520819 |             |
| 5.88E-02 | 1.58E-01 | 1.30  | 1.58E-05 | THC2579173      |           |             |
| 1.50E-01 | 9.43E-02 | -1.30 | 1.84E-02 | NM_001554       | Hs.8867   | CYR61       |
| 1.32E-04 | 7.88E-01 | -1.30 | 2.58E-02 | NM_002615       | Hs.694727 | SERPINF1    |
| 1.69E-01 | 1.60E-01 | -1.30 | 4.19E-02 | X91815          | Hs.468274 | SLC8A1      |
| 1.33E-01 | 2.55E-03 | -1.30 | 2.50E-03 | NM_015319       | Hs.6147   | TENC1       |
| 3.27E-01 | 1.49E-02 | 1.30  | 1.95E-02 | XR_037019       |           | LOC10013386 |
| 1.99E-02 | 1.59E-02 | 1.30  | 3.25E-04 | BX115087        | Hs.668548 |             |
| 1.10E-03 | 3.23E-02 | 1.30  | 2.89E-02 | BC010126        | Hs.654410 |             |
| 9.14E-02 | 1.64E-01 | -1.30 | 2.96E-06 | NM_201431       | Hs.590920 | RASSF6      |
| 6.03E-01 | 1.98E-03 | 1.30  | 5.04E-03 | NM_004425       | Hs.81071  | ECM1        |
| 9.41E-01 | 2.57E-02 | 1.30  | 2.87E-02 | NM_020704       | Hs.489988 | FAM40B      |
| 2.85E-02 | 8.00E-01 | -1.30 | 7.41E-03 | THC2648227      |           |             |
| 3.87E-02 | 3.51E-03 | 1.30  | 3.21E-02 | NM_020349       | Hs.73708  | ANKRD2      |
| 5.33E-01 | 1.76E-03 | -1.30 | 4.38E-03 | THC2707284      |           |             |
| 3.95E-02 | 1.01E-02 | 1.30  | 9.00E-03 | NM_033300       | Hs.576154 | LRP8        |
| 6.12E-01 | 5.12E-01 | -1.30 | 5.96E-03 | NM_001629       | Hs.507658 | ALOX5AP     |
| 2.70E-01 | 3.79E-01 | -1.30 | 1.63E-02 | NM_032023       | Hs.522895 | RASSF4      |
| 1.48E-01 | 4.53E-01 | 1.30  | 1.97E-04 | ENST00000244321 | Hs.22049  |             |
| 4.49E-02 | 3.37E-03 | 1.30  | 6.83E-04 | NM_153347       | Hs.502100 | TMEM86A     |
| 8.27E-03 | 5.19E-01 | 1.30  | 1.16E-02 | AB039791        | Hs.664579 | ARP11       |
| 4.14E-02 | 9.32E-01 | -1.30 | 3.76E-03 | NM_181795       | Hs.486354 | PKIB        |
| 7.67E-02 | 1.68E-01 | 1.30  | 2.91E-02 | NM_004232       | Hs.44439  | SOCS6       |
| 1.96E-02 | 1.27E-01 | -1.30 | 4.87E-03 | NM_006475       | Hs.136348 | POSTN       |
| 5.12E-01 | 4.22E-03 | -1.30 | 8.58E-03 | THC2705456      |           |             |
| 2.32E-03 | 9.00E-03 | -1.29 | 5.29E-05 | ENST00000361567 |           |             |
| 1.48E-02 | 9.21E-01 | 1.29  | 1.03E-02 | NM_174932       | Hs.372939 | BPIL2       |
| 2.94E-01 | 1.91E-02 | 1.29  | 4.74E-03 | THC2534530      |           |             |
| 9.89E-01 | 7.83E-01 | -1.29 | 3.00E-02 | NM_017899       | Hs.525709 | TESC        |
| 2.62E-01 | 3.21E-01 | -1.29 | 1.20E-02 |                 |           |             |
| 6.01E-01 | 6.16E-01 | 1.29  | 3.12E-02 | AW972815        | Hs.290255 |             |
| 3.28E-02 | 5.31E-03 | 1.29  | 2.79E-03 |                 |           |             |
| 5.96E-01 | 8.32E-02 | -1.29 | 1.89E-04 | NM_002030       | Hs.445466 | FPR3        |
| 5.80E-01 | 8.64E-01 | 1.29  | 4.85E-02 | ENST00000390689 | Hs.61552  | KRTAP19-1   |
| 5.10E-02 | 5.37E-01 | -1.29 | 4.18E-04 | NM_003451       | Hs.172979 | ZNF177      |
| 1.09E-01 | 3.01E-02 | -1.29 | 6.17E-04 | NM_004588       | Hs.129783 | SCN2B       |
| 5.99E-02 | 1.91E-02 | 1.29  | 2.05E-02 | THC2553305      |           |             |
| 3.92E-02 | 3.04E-03 | -1.29 | 6.90E-03 | NM_005345       | Hs.520028 | HSPA1A      |
| 2.52E-03 | 2.48E-02 | 1.29  | 1.65E-02 | THC2753968      |           |             |
| 5.18E-06 | 2.62E-02 | 1.29  | 3.07E-02 | NM_005046       | Hs.151254 | KLK7        |
| 3.51E-01 | 7.59E-04 | -1.29 | 3.95E-02 | NM_001006607    | Hs.646568 | LRRC37A2    |
| 1.05E-03 | 2.77E-02 | 1.29  | 2.47E-04 | NM_015704       | Hs.570455 | FAM152B     |
| 2.86E-02 | 3.21E-03 | 1.29  | 1.22E-02 | AK022407        | Hs.636866 |             |
| 2.42E-02 | 2.15E-01 | 1.29  | 4.25E-02 |                 |           |             |
| 3.62E-02 | 9.81E-01 | -1.29 | 2.00E-02 | NM_000300       | Hs.466804 | PLA2G2A     |
| 3.84E-02 | 9.27E-03 | 1.29  | 1.14E-05 | AK024346        | Hs.483816 | LOC153346   |
| 1.29E-02 | 8.87E-01 | -1.29 | 7.73E-04 | NM_198560       | Hs.56782  | LHFPL4      |

|          |          |       |          |                 |           |           |
|----------|----------|-------|----------|-----------------|-----------|-----------|
| 1.25E-01 | 8.36E-01 | 1.29  | 3.25E-03 | NM_032726       | Hs.632528 | PLCD4     |
| 3.76E-02 | 9.84E-01 | 1.29  | 1.78E-03 | NM_003963       | Hs.184194 | TM4SF5    |
| 2.77E-02 | 8.59E-04 | 1.29  | 1.68E-02 | NM_012166       | Hs.709527 | FBXO10    |
| 3.97E-01 | 5.14E-02 | 1.29  | 3.67E-05 | AF131834        | Hs.4892   |           |
| 4.93E-03 | 2.19E-01 | -1.29 | 2.89E-02 | NM_006933       | Hs.302742 | SLC5A3    |
| 5.11E-03 | 1.15E-01 | -1.29 | 3.17E-02 | NM_201269       | Hs.173001 | ZNF644    |
| 4.38E-01 | 4.26E-02 | 1.29  | 2.96E-02 |                 |           |           |
| 4.84E-01 | 2.52E-01 | -1.29 | 1.34E-02 | NM_000061       | Hs.159494 | BTK       |
| 9.24E-01 | 4.69E-02 | -1.29 | 3.06E-02 |                 |           |           |
| 8.86E-03 | 1.05E-02 | -1.29 | 1.18E-04 | AK097322        | Hs.465808 |           |
| 1.32E-01 | 3.80E-01 | 1.29  | 4.08E-05 | CR593560        | Hs.238964 | LOC440934 |
| 9.25E-02 | 7.98E-03 | 1.29  | 2.05E-03 | BC041366        | Hs.524085 | USP2      |
| 6.20E-02 | 4.52E-01 | 1.29  | 5.59E-04 | BC111002        | Hs.591252 | ARSI      |
| 6.79E-01 | 2.90E-01 | -1.29 | 5.92E-05 | NM_002135       | Hs.524430 | NR4A1     |
| 3.57E-02 | 3.11E-02 | 1.29  | 4.49E-02 | ENST00000306634 |           | LOC643205 |
| 1.67E-01 | 2.26E-01 | -1.29 | 8.10E-03 | NM_024848       | Hs.709528 | MORN1     |
| 1.96E-01 | 1.31E-01 | 1.29  | 2.53E-02 | THC2645080      |           |           |
| 1.60E-02 | 9.58E-03 | 1.29  | 4.48E-02 | NM_001897       | Hs.513044 | CSPG4     |
| 2.56E-03 | 6.05E-01 | 1.29  | 3.42E-02 | ENST00000166133 | Hs.248087 |           |
| 5.25E-02 | 3.39E-01 | 1.28  | 7.41E-05 |                 |           |           |
| 7.78E-02 | 1.92E-01 | -1.28 | 2.54E-02 | NM_003151       | Hs.80642  | STAT4     |
| 8.40E-03 | 2.47E-01 | 1.28  | 4.06E-02 | NM_001024594    | Hs.61329  | C1orf53   |
| 1.19E-01 | 2.54E-01 | 1.28  | 3.68E-02 | NM_006541       | Hs.42644  | GLRX3     |
| 4.53E-02 | 2.37E-04 | 1.28  | 6.22E-03 | NM_017893       | Hs.591923 | SEMA4G    |
| 5.02E-01 | 1.04E-01 | 1.28  | 4.30E-04 | NM_006536       | Hs.241551 | CLCA2     |
| 2.91E-01 | 8.84E-01 | -1.28 | 1.88E-03 | NM_014505       | Hs.525529 | KCNMB4    |
| 5.68E-02 | 5.82E-01 | 1.28  | 6.28E-04 | NM_018000       | Hs.709755 | MREG      |
| 3.30E-02 | 1.07E-01 | -1.28 | 3.47E-02 | NM_020872       | Hs.12723  | CNTN3     |
| 3.28E-02 | 3.15E-01 | -1.28 | 1.66E-02 | AK129724        |           |           |
| 2.56E-03 | 6.56E-02 | -1.28 | 4.50E-09 | NM_152436       | Hs.406728 | GLIPR1L2  |
| 1.36E-01 | 1.79E-03 | 1.28  | 3.11E-02 | BG571904        | Hs.660990 |           |
| 4.55E-02 | 3.15E-02 | 1.28  | 2.02E-02 |                 |           |           |
| 7.35E-02 | 2.87E-02 | 1.28  | 9.43E-05 | BM471507        | Hs.436973 |           |
| 7.43E-01 | 4.74E-03 | 1.28  | 1.31E-02 | NM_175062       | Hs.190559 | RASGEF1C  |
| 4.15E-02 | 2.16E-02 | 1.28  | 1.24E-02 | NM_181538       | Hs.647524 | GJC3      |
| 7.45E-02 | 5.60E-01 | -1.28 | 5.79E-03 | NM_001040114    | Hs.460109 | MYH11     |
| 8.38E-04 | 6.56E-04 | 1.28  | 4.91E-02 | BF088423        | Hs.108973 |           |
| 2.92E-01 | 1.80E-01 | 1.28  | 2.72E-02 | NM_000259       | Hs.21213  | MYO5A     |
| 1.99E-01 | 9.99E-03 | 1.28  | 2.28E-07 | NM_002760       | Hs.632287 | PRKY      |
| 5.77E-01 | 2.43E-01 | -1.28 | 2.36E-02 | NM_021965       | Hs.307835 | PGM5      |
| 1.77E-03 | 5.64E-01 | -1.28 | 4.40E-03 | NM_030925       | Hs.87159  | CAB39L    |
| 6.17E-03 | 7.65E-02 | 1.28  | 1.73E-09 | NM_022740       | Hs.397465 | HIPK2     |
| 2.20E-02 | 3.61E-02 | 1.28  | 2.47E-03 | AK021848        |           |           |
| 1.58E-01 | 1.13E-01 | 1.28  | 2.81E-03 | NM_022147       | Hs.43388  | RTP4      |
| 6.28E-01 | 1.18E-01 | 1.28  | 4.84E-03 |                 |           |           |
| 5.92E-03 | 1.97E-02 | -1.28 | 6.09E-11 | NM_001250       | Hs.472860 | CD40      |
| 1.03E-01 | 3.08E-01 | 1.28  | 1.15E-02 | AK090762        | Hs.531632 |           |

|          |          |       |          |                 |           |           |
|----------|----------|-------|----------|-----------------|-----------|-----------|
| 3.56E-01 | 3.38E-01 | 1.28  | 4.15E-02 | THC2608658      |           |           |
| 1.12E-01 | 3.05E-01 | -1.28 | 2.66E-02 | NM_152703       | Hs.489118 | SAMD9L    |
| 1.02E-01 | 2.15E-03 | 1.28  | 5.33E-03 | NM_022740       | Hs.397465 | HIPK2     |
| 2.21E-03 | 4.37E-02 | 1.28  | 2.82E-02 | NM_052819       | Hs.696253 | CARD14    |
| 1.63E-01 | 5.40E-01 | -1.28 | 9.66E-05 | NM_016952       | Hs.38034  | CDON      |
| 3.85E-04 | 3.26E-02 | -1.28 | 2.02E-03 | NM_003062       | Hs.604116 | SLIT3     |
| 1.40E-01 | 2.79E-03 | 1.28  | 1.62E-02 |                 |           |           |
| 4.79E-02 | 7.35E-01 | -1.28 | 3.14E-03 | NM_004816       | Hs.118003 | C9orf61   |
| 5.70E-01 | 4.00E-02 | 1.28  | 3.17E-02 | NM_004004       | Hs.591234 | GJB2      |
| 1.75E-01 | 1.59E-03 | 1.28  | 9.35E-04 | NM_018144       | Hs.112955 | SEC61A2   |
| 1.49E-02 | 1.49E-01 | 1.28  | 9.17E-03 | NM_000710       | Hs.525572 | BDKRB1    |
| 8.80E-01 | 5.65E-01 | -1.28 | 7.35E-03 | THC2719486      |           |           |
| 1.94E-02 | 3.55E-02 | 1.28  | 4.11E-02 |                 |           |           |
| 7.96E-01 | 1.22E-01 | -1.28 | 2.30E-02 | NM_006864       | Hs.631592 | LILRB3    |
| 1.60E-01 | 7.40E-01 | 1.28  | 4.75E-02 | NM_000226       | Hs.654569 | KRT9      |
| 2.01E-03 | 3.00E-03 | 1.28  | 1.63E-02 | NM_002133       | Hs.517581 | HMOX1     |
| 1.11E-01 | 7.29E-02 | 1.28  | 1.57E-02 | NM_002960       | Hs.557609 | S100A3    |
| 9.68E-04 | 9.60E-02 | -1.28 | 7.04E-08 | NM_001034841    | Hs.648523 | LOC162073 |
| 3.96E-01 | 2.58E-01 | 1.28  | 2.13E-03 | AK094322        | Hs.425633 | CKMT1B    |
| 1.05E-01 | 5.77E-02 | -1.28 | 1.48E-02 | AV652851        | Hs.20255  |           |
| 5.34E-01 | 3.76E-01 | 1.28  | 2.03E-03 | NM_006745       | Hs.105269 | SC4MOL    |
| 1.84E-02 | 5.49E-03 | 1.28  | 2.98E-02 | BX281122        | Hs.665091 |           |
| 7.22E-01 | 6.44E-02 | -1.28 | 7.76E-03 | NM_032782       | Hs.710500 | HAVCR2    |
| 3.96E-01 | 6.74E-01 | -1.28 | 2.14E-03 | BC005008        | Hs.466814 | CEACAM6   |
| 2.69E-02 | 1.73E-02 | -1.28 | 8.73E-03 | NM_002017       | Hs.504281 | FLI1      |
| 6.31E-01 | 4.30E-02 | -1.28 | 2.85E-02 | NM_004271       | Hs.653138 | LY86      |
| 2.77E-02 | 1.37E-01 | -1.27 | 9.91E-09 | NM_033254       | Hs.591318 | BOC       |
| 8.11E-03 | 1.87E-01 | -1.27 | 6.19E-03 | NM_018151       | Hs.655671 | RIF1      |
| 2.79E-01 | 3.66E-01 | -1.27 | 7.08E-06 | NM_005076       | Hs.519220 | CNTN2     |
| 6.69E-01 | 6.91E-03 | -1.27 | 3.83E-02 | NM_002371       | Hs.80395  | MAL       |
| 4.93E-01 | 5.42E-02 | 1.27  | 3.49E-02 | ENST00000267857 | Hs.194710 | GCNT3     |
| 8.98E-02 | 3.52E-03 | -1.27 | 5.44E-04 | NM_198439       | Hs.101949 | KBTBD3    |
| 1.13E-01 | 4.73E-03 | 1.27  | 9.86E-03 | AA639753        | Hs.547580 |           |
| 3.07E-01 | 1.27E-01 | 1.27  | 3.84E-03 | NM_031854       | Hs.572443 | KRTAP4-12 |
| 2.25E-02 | 1.21E-01 | -1.27 | 5.56E-03 | NM_006113       | Hs.267659 | VAV3      |
| 7.12E-02 | 1.27E-03 | 1.27  | 2.88E-02 | NM_004577       | Hs.512656 | PSPH      |
| 1.25E-04 | 6.67E-01 | -1.27 | 4.49E-02 | NM_005086       | Hs.709230 | SSPN      |
| 1.15E-01 | 1.36E-02 | -1.27 | 1.16E-03 | NM_016270       | Hs.107740 | KLF2      |
| 2.63E-01 | 1.84E-02 | -1.27 | 4.21E-03 | THC2537179      | Hs.257664 |           |
| 1.86E-03 | 8.13E-02 | 1.27  | 4.19E-02 | BC001742        | Hs.679408 | LOC90834  |
| 5.05E-03 | 3.02E-03 | 1.27  | 3.89E-03 | NM_001719       | Hs.473163 | BMP7      |
| 7.95E-03 | 4.14E-02 | -1.27 | 4.60E-04 | BC006271        | Hs.659341 |           |
| 5.25E-01 | 8.87E-03 | 1.27  | 3.56E-02 | BC028580        | Hs.676966 | MGC26597  |
| 3.66E-02 | 8.51E-01 | -1.27 | 1.13E-02 | NM_030756       | Hs.593995 | TCF7L2    |
| 9.78E-01 | 2.66E-02 | -1.27 | 1.98E-03 | NM_152586       | Hs.657355 | USP54     |
| 8.94E-02 | 7.55E-01 | -1.27 | 8.71E-03 | NM_002178       | Hs.274313 | IGFBP6    |
| 2.01E-03 | 7.07E-01 | -1.27 | 2.92E-02 | NM_000062       | Hs.384598 | SERPING1  |



|          |          |       |          |                 |           |           |
|----------|----------|-------|----------|-----------------|-----------|-----------|
| 1.65E-01 | 2.75E-02 | -1.27 | 2.74E-05 | NM_015147       | Hs.709257 | CEP68     |
| 9.18E-01 | 1.92E-02 | 1.27  | 2.45E-02 | NM_203391       | Hs.1466   | GK        |
| 2.42E-01 | 4.33E-03 | -1.27 | 3.87E-02 | NM_018179       | Hs.591151 | ATF7IP    |
| 2.63E-01 | 1.42E-01 | 1.27  | 9.64E-09 | BC017694        | Hs.655067 | FAM128B   |
| 2.15E-04 | 2.62E-01 | 1.27  | 4.17E-02 |                 |           |           |
| 7.53E-01 | 1.31E-01 | 1.27  | 1.74E-02 | NM_001276       | Hs.382202 | CHI3L1    |
| 1.66E-02 | 3.07E-01 | -1.27 | 4.99E-02 | NM_015678       | Hs.491172 | NBEA      |
| 7.21E-03 | 1.40E-01 | 1.27  | 4.58E-02 | THC2680492      |           |           |
| 2.45E-01 | 3.55E-01 | -1.27 | 3.39E-02 |                 |           |           |
| 5.57E-01 | 2.64E-01 | 1.27  | 1.44E-03 | NM_002632       | Hs.252820 | PGF       |
| 1.40E-01 | 3.47E-01 | 1.27  | 4.37E-02 | BC015987        | Hs.709396 |           |
| 1.81E-01 | 8.31E-01 | 1.27  | 3.06E-02 | BC008001        |           |           |
| 4.82E-02 | 5.62E-02 | 1.27  | 1.44E-02 | NM_175747       | Hs.195398 | OLIG3     |
| 4.60E-01 | 1.32E-01 | 1.27  | 2.31E-02 | ENST00000357816 | Hs.528335 | FAM123A   |
| 1.23E-01 | 5.71E-01 | -1.27 | 3.03E-02 | NM_152721       | Hs.569915 | DOK6      |
| 2.50E-02 | 2.02E-02 | -1.27 | 1.38E-02 | NM_006391       | Hs.699345 | IPO7      |
| 4.35E-03 | 7.94E-02 | 1.27  | 2.51E-02 | AK057267        | Hs.122927 | CLIP4     |
| 8.39E-01 | 7.59E-02 | 1.27  | 1.52E-02 | CR936670        | Hs.369819 | TBC1D16   |
| 9.98E-02 | 3.32E-04 | 1.27  | 1.76E-02 | NM_002690       | Hs.654484 | POLB      |
| 1.18E-02 | 3.85E-01 | 1.27  | 4.32E-04 | NM_139165       | Hs.511818 | RAET1E    |
| 1.86E-02 | 1.27E-02 | 1.27  | 2.57E-02 | ENST00000360737 | Hs.659113 |           |
| 8.32E-01 | 8.61E-01 | 1.27  | 5.47E-03 | NM_020722       | Hs.596667 | KIAA1211  |
| 5.30E-02 | 7.26E-02 | -1.27 | 4.68E-06 | NM_001001132    | Hs.160324 | ITSN1     |
| 1.32E-01 | 6.71E-01 | 1.27  | 1.52E-02 | NM_198060       | Hs.268788 | NRAP      |
| 3.43E-03 | 1.28E-01 | 1.27  | 2.81E-07 | NM_013314       | Hs.665244 | BLNK      |
| 1.19E-03 | 5.20E-02 | 1.27  | 8.16E-08 | NM_025045       | Hs.474822 | BAIAP2L2  |
| 5.88E-02 | 2.71E-02 | 1.27  | 6.24E-04 | BC000200        | Hs.111286 | MRPS11    |
| 5.28E-01 | 1.34E-02 | -1.27 | 6.04E-03 | NM_145867       | Hs.706741 | LTC4S     |
| 2.06E-02 | 2.41E-01 | 1.27  | 2.53E-02 | BQ323779        | Hs.655491 |           |
| 3.23E-01 | 6.26E-01 | -1.27 | 5.01E-09 |                 |           |           |
| 8.64E-03 | 3.41E-01 | -1.27 | 4.37E-02 | AK002107        | Hs.123072 | RAB3B     |
| 9.79E-01 | 2.05E-02 | 1.27  | 2.40E-02 |                 |           |           |
| 7.07E-01 | 5.31E-03 | -1.27 | 1.78E-03 | NM_145306       | Hs.522992 | C10orf35  |
| 1.95E-02 | 2.72E-01 | 1.27  | 5.18E-03 | NM_020877       | Hs.367649 | DNAH2     |
| 3.35E-01 | 2.81E-02 | -1.27 | 2.25E-03 |                 |           |           |
| 1.80E-02 | 7.21E-02 | 1.27  | 4.66E-04 | NM_020375       | Hs.504545 | C12orf5   |
| 7.22E-01 | 9.60E-01 | 1.27  | 1.01E-02 | NM_003658       | Hs.591944 | BARX2     |
| 5.98E-03 | 1.43E-01 | -1.27 | 2.95E-03 | NM_005596       | Hs.709255 | NFIB      |
| 1.02E-01 | 5.89E-02 | 1.27  | 1.26E-02 | NM_000785       | Hs.524528 | CYP27B1   |
| 3.27E-02 | 4.02E-02 | 1.27  | 2.31E-02 | BC042589        | Hs.130853 |           |
| 2.39E-02 | 3.67E-02 | 1.27  | 1.51E-02 | NM_001005338    | Hs.537383 | OR5H1     |
| 1.75E-01 | 5.28E-03 | -1.27 | 1.36E-07 | NM_015975       | Hs.592248 | TAF9B     |
| 1.51E-02 | 3.89E-01 | 1.27  | 7.55E-04 |                 |           |           |
| 1.28E-04 | 2.37E-01 | -1.27 | 2.07E-02 | NM_007249       | Hs.373857 | KLF12     |
| 7.60E-01 | 4.09E-01 | -1.27 | 1.68E-02 | AK090602        | Hs.130499 | LOC283143 |
| 1.34E-02 | 3.67E-02 | 1.27  | 8.85E-03 | THC2548576      |           |           |
| 8.31E-02 | 3.83E-01 | -1.27 | 6.28E-03 | NM_000901       | Hs.163924 | NR3C2     |

|          |          |       |          |              |           |             |
|----------|----------|-------|----------|--------------|-----------|-------------|
| 8.45E-01 | 3.89E-01 | 1.27  | 4.46E-02 | BC039117     | Hs.524331 | OVOS2       |
| 2.65E-01 | 1.91E-02 | 1.27  | 7.60E-05 | AK024346     | Hs.483816 | LOC153346   |
| 2.70E-02 | 2.72E-01 | 1.27  | 1.73E-03 | AK022390     | Hs.656537 |             |
| 3.33E-01 | 9.12E-02 | -1.27 | 2.55E-02 | NM_001623    | Hs.76364  | AIF1        |
| 5.01E-02 | 2.86E-02 | 1.26  | 3.51E-05 | NM_012324    | Hs.558180 | MAPK8IP2    |
| 6.14E-03 | 3.53E-02 | -1.26 | 2.26E-06 | NM_001001415 | Hs.709598 | ZNF429      |
| 5.68E-02 | 5.49E-03 | -1.26 | 1.86E-04 | NM_015180    | Hs.525392 | SYNE2       |
| 1.75E-01 | 1.16E-01 | 1.26  | 5.50E-04 | NM_013941    | Hs.631997 | OR10C1      |
| 7.04E-01 | 7.65E-01 | -1.26 | 1.39E-02 | NM_001629    | Hs.507658 | ALOX5AP     |
| 2.81E-01 | 4.80E-02 | -1.26 | 1.19E-02 | NM_002842    | Hs.179770 | PTPRH       |
| 1.94E-01 | 6.10E-01 | -1.26 | 4.75E-04 | NM_003436    | Hs.85863  | ZNF135      |
| 2.62E-01 | 7.13E-01 | -1.26 | 2.09E-02 | NM_001772    | Hs.83731  | CD33        |
| 1.18E-01 | 1.38E-02 | 1.26  | 6.53E-10 | AF112968     | Hs.655240 | SLC25A15    |
| 1.12E-03 | 8.15E-02 | -1.26 | 3.57E-04 |              |           |             |
| 1.78E-02 | 9.39E-02 | -1.26 | 1.28E-05 | NM_000848    | Hs.279837 | GSTM2       |
| 3.26E-01 | 1.73E-01 | -1.26 | 1.85E-03 | AJ420378     | Hs.503043 | CPT1A       |
| 1.45E-02 | 6.55E-02 | -1.26 | 4.34E-02 | NM_014840    | Hs.524692 | NUAK1       |
| 7.67E-02 | 5.14E-03 | 1.26  | 9.35E-03 | NM_024930    | Hs.274256 | ELOVL7      |
| 5.15E-01 | 2.15E-02 | -1.26 | 7.44E-03 | NM_014935    | Hs.253146 | PLEKHA6     |
| 5.22E-01 | 1.31E-02 | 1.26  | 4.48E-02 | NM_198570    | Hs.677488 | VWC2        |
| 1.15E-04 | 2.15E-02 | 1.26  | 1.29E-02 | NM_144505    | Hs.104570 | KLK8        |
| 9.15E-01 | 9.20E-01 | -1.26 | 4.48E-02 | NM_001768    | Hs.85258  | CD8A        |
| 8.65E-03 | 5.11E-02 | -1.26 | 3.83E-03 | NM_032184    | Hs.670497 | SYDE2       |
| 6.79E-04 | 2.82E-01 | -1.26 | 1.42E-02 | NM_016578    | Hs.420229 | RSF1        |
| 6.78E-01 | 5.32E-02 | 1.26  | 1.07E-02 | THC2656826   |           |             |
| 1.17E-02 | 1.24E-01 | -1.26 | 3.29E-04 | NM_007038    | Hs.58324  | ADAMTS5     |
| 9.03E-01 | 7.95E-02 | -1.26 | 1.99E-03 | NM_030802    | Hs.514308 | FAM117A     |
| 3.42E-02 | 1.19E-03 | 1.26  | 2.93E-03 | NM_021214    | Hs.459072 | FAM108C1    |
| 4.90E-01 | 4.17E-01 | -1.26 | 4.13E-03 | NM_033328    | Hs.131288 | CAPZA3      |
| 3.33E-03 | 1.71E-02 | 1.26  | 4.01E-04 | NM_001006641 | Hs.5476   | SLC25A25    |
| 1.26E-01 | 6.94E-01 | -1.26 | 1.79E-02 | NM_014879    | Hs.2465   | P2RY14      |
| 4.86E-02 | 6.71E-01 | -1.26 | 5.39E-04 | NM_005909    | Hs.637017 | MAP1B       |
| 1.40E-01 | 2.26E-02 | 1.26  | 9.39E-03 | BC020341     |           |             |
| 5.68E-01 | 3.18E-01 | -1.26 | 6.72E-04 | NM_013322    | Hs.571296 | SNX10       |
| 5.67E-01 | 5.62E-03 | 1.26  | 4.81E-02 | BC029107     | Hs.657649 | FMN1        |
| 3.24E-01 | 6.14E-01 | -1.26 | 8.46E-07 | NM_003970    | Hs.443683 | MYOM2       |
| 8.99E-02 | 3.42E-01 | 1.26  | 2.32E-02 |              |           |             |
| 6.42E-02 | 4.27E-02 | 1.26  | 1.25E-04 | NM_078476    | Hs.159028 | BTN2A1      |
| 1.66E-02 | 7.46E-02 | -1.26 | 2.57E-02 | NM_019605    | Hs.708143 | SERTAD4     |
| 3.78E-02 | 2.93E-03 | -1.26 | 7.70E-03 | NM_007366    | Hs.410477 | PLA2R1      |
| 6.12E-03 | 1.67E-01 | 1.26  | 2.00E-02 | NM_030576    | Hs.591166 | LIMD2       |
| 2.16E-02 | 5.36E-01 | -1.26 | 5.51E-04 | NM_052913    | Hs.591341 | TMEM200A    |
| 5.16E-03 | 8.78E-01 | 1.26  | 6.49E-03 | AL137592     | Hs.272813 | DUOX1       |
| 1.04E-02 | 5.54E-01 | 1.26  | 2.15E-03 | NM_017422    | Hs.180142 | CALML5      |
| 3.89E-02 | 6.32E-02 | 1.26  | 8.55E-03 | NM_003839    | Hs.204044 | TNFRSF11A   |
| 1.99E-01 | 5.38E-01 | 1.26  | 7.44E-03 | THC2659561   |           |             |
| 2.31E-03 | 1.03E-01 | 1.26  | 4.46E-02 | AK055963     | Hs.647777 | RP4-621O15. |

|          |          |       |          |              |           |           |
|----------|----------|-------|----------|--------------|-----------|-----------|
| 3.97E-03 | 1.57E-02 | 1.26  | 3.98E-04 | NM_022162    | Hs.592072 | NOD2      |
| 9.98E-01 | 9.79E-02 | -1.26 | 1.94E-03 | NM_017409    | Hs.44276  | HOXC10    |
| 2.72E-03 | 2.30E-02 | -1.26 | 7.49E-03 | NM_002184    | Hs.532082 | IL6ST     |
| 7.54E-01 | 5.44E-01 | 1.26  | 4.98E-02 | AL390143     | Hs.676449 |           |
| 5.18E-03 | 6.10E-01 | 1.26  | 2.66E-02 | NM_031948    | Hs.332878 | PRSS27    |
| 8.47E-04 | 3.33E-01 | 1.26  | 5.14E-03 | AL832142     | Hs.656585 |           |
| 7.21E-01 | 2.95E-02 | -1.26 | 3.47E-02 | NM_033647    | Hs.505941 | HELB      |
| 1.08E-02 | 2.72E-01 | 1.26  | 5.34E-03 | NM_003842    | Hs.521456 | TNFRSF10B |
| 1.12E-01 | 4.45E-02 | 1.26  | 3.08E-02 | NR_003666    |           | LOC441251 |
| 1.29E-01 | 3.46E-02 | 1.26  | 4.95E-02 | THC2732966   |           |           |
| 1.07E-01 | 1.22E-02 | -1.26 | 1.71E-03 | NM_152989    | Hs.657542 | SOX5      |
| 2.22E-01 | 5.80E-01 | 1.26  | 4.61E-02 | THC2659236   |           |           |
| 2.73E-01 | 1.28E-01 | -1.26 | 5.39E-06 | NM_001031847 | Hs.503043 | CPT1A     |
| 1.10E-01 | 6.68E-01 | 1.26  | 2.83E-04 | THC2684848   |           |           |
| 7.87E-02 | 1.73E-01 | 1.26  | 4.34E-03 | AF234262     |           |           |
| 6.41E-01 | 4.16E-01 | 1.26  | 3.89E-02 |              |           |           |
| 1.23E-01 | 3.84E-02 | -1.26 | 2.57E-02 | NM_001962    | Hs.658451 | EFNA5     |
| 1.22E-02 | 2.75E-02 | 1.26  | 1.42E-03 | NM_016352    | Hs.93764  | CPA4      |
| 1.24E-01 | 1.11E-01 | 1.26  | 6.92E-03 | CR601315     | Hs.507783 | NHLRC3    |
| 1.67E-01 | 6.15E-01 | 1.26  | 3.56E-04 | NM_006238    | Hs.696032 | PPARD     |
| 1.01E-01 | 1.16E-01 | 1.26  | 2.62E-02 |              |           |           |
| 2.25E-02 | 2.65E-01 | -1.26 | 4.94E-02 | NM_021205    | Hs.647774 | RHOU      |
| 6.29E-02 | 2.40E-01 | 1.26  | 6.66E-04 | BC008026     | Hs.676121 | MGC16025  |
| 1.43E-01 | 1.53E-01 | -1.26 | 1.74E-03 | NM_016848    | Hs.656806 | SHC3      |
| 2.16E-03 | 4.33E-02 | 1.26  | 3.08E-02 | NM_002658    | Hs.77274  | PLAU      |
| 4.01E-01 | 6.18E-01 | -1.26 | 2.98E-02 | NM_130782    | Hs.440890 | RGS18     |
| 8.98E-02 | 1.39E-01 | -1.26 | 1.20E-03 | NM_057168    | Hs.272375 | WNT16     |
| 5.55E-03 | 2.74E-01 | 1.26  | 1.26E-03 | NM_033393    | Hs.132629 | FHDC1     |
| 5.23E-02 | 1.41E-02 | 1.25  | 2.46E-02 | NM_003236    | Hs.170009 | TGFA      |
| 3.62E-01 | 7.82E-02 | -1.25 | 8.69E-11 | NM_024681    | Hs.517597 | KCTD17    |
| 6.80E-04 | 3.69E-04 | -1.25 | 4.49E-02 | NM_015710    | Hs.421907 | GLTSCR2   |
| 1.18E-01 | 2.98E-01 | 1.25  | 3.20E-02 | NM_001103161 | Hs.591522 | SH2D5     |
| 2.91E-01 | 2.45E-01 | -1.25 | 5.38E-04 | NM_002214    | Hs.592171 | ITGB8     |
| 1.70E-04 | 2.34E-01 | -1.25 | 1.72E-02 | BC031314     | Hs.26766  |           |
| 1.45E-01 | 5.01E-01 | 1.25  | 2.87E-04 | AW138098     | Hs.539067 |           |
| 1.37E-02 | 3.02E-02 | 1.25  | 8.97E-03 | THC2743652   |           |           |
| 4.67E-03 | 2.25E-02 | -1.25 | 8.36E-03 | NM_006283    | Hs.279245 | TACC1     |
| 2.63E-02 | 1.96E-01 | 1.25  | 1.37E-02 | AV698803     | Hs.540419 |           |
| 1.14E-01 | 4.02E-01 | -1.25 | 1.72E-02 | NM_003106    | Hs.518438 | SOX2      |
| 5.45E-03 | 1.02E-02 | -1.25 | 5.57E-08 | NM_001967    | Hs.518475 | EIF4A2    |
| 1.40E-02 | 6.42E-01 | -1.25 | 1.44E-02 | THC2640099   |           |           |
| 5.00E-02 | 1.31E-02 | 1.25  | 7.25E-05 | NM_014830    | Hs.591025 | ZBTB39    |
| 4.65E-03 | 1.32E-02 | -1.25 | 6.00E-03 | NM_013262    | Hs.484738 | MYLIP     |
| 8.29E-01 | 7.37E-02 | 1.25  | 2.45E-04 | BC027471     |           | LOC440173 |
| 1.67E-01 | 3.99E-02 | 1.25  | 3.32E-03 | NM_007235    | Hs.85951  | XPOT      |
| 1.34E-02 | 2.93E-01 | -1.25 | 5.01E-05 | NM_003278    | Hs.476092 | CLEC3B    |
| 1.47E-01 | 6.29E-01 | -1.25 | 1.26E-02 | NM_130810    | Hs.126403 | DYX1C1    |

|          |          |       |          |                 |           |             |
|----------|----------|-------|----------|-----------------|-----------|-------------|
| 1.86E-01 | 2.26E-01 | -1.25 | 4.17E-06 | NM_004117       | Hs.407190 | FKBP5       |
| 5.65E-02 | 6.64E-03 | 1.25  | 1.16E-04 | NM_001896       | Hs.82201  | CSNK2A2     |
| 1.20E-02 | 4.54E-02 | -1.25 | 6.51E-05 | NM_153705       | Hs.83286  | KDELC2      |
| 8.63E-02 | 8.11E-03 | -1.25 | 3.73E-02 | NM_201269       | Hs.173001 | ZNF644      |
| 1.62E-02 | 3.93E-02 | -1.25 | 8.94E-04 | ENST00000361227 |           | ND3         |
| 2.83E-03 | 7.03E-02 | -1.25 | 4.64E-02 | NM_006287       | Hs.516578 | TFPI        |
| 2.32E-01 | 2.60E-01 | -1.25 | 3.86E-02 | NM_032023       | Hs.522895 | RASSF4      |
| 6.88E-03 | 7.84E-02 | 1.25  | 8.88E-05 | THC2639487      |           |             |
| 2.36E-01 | 2.06E-01 | 1.25  | 2.78E-02 | AK000347        | Hs.272794 | LAX1        |
| 7.22E-02 | 2.85E-02 | -1.25 | 2.71E-04 | NM_000390       | Hs.496449 | CHM         |
| 2.19E-03 | 5.28E-01 | -1.25 | 1.63E-05 | BC012984        | Hs.657382 | PARD3B      |
| 1.37E-01 | 7.15E-03 | 1.25  | 2.61E-02 |                 |           |             |
| 1.93E-01 | 9.01E-02 | 1.25  | 1.50E-04 | NM_006504       | Hs.127022 | PTPRE       |
| 6.97E-02 | 2.03E-02 | -1.25 | 1.91E-03 | AF196185        | Hs.131489 | PARD3       |
| 1.03E-04 | 6.17E-03 | 1.25  | 5.71E-03 | NM_015209       | Hs.368823 | RP1-21O18.1 |
| 1.77E-01 | 2.65E-01 | 1.25  | 8.70E-04 | NM_000342       | Hs.443948 | SLC4A1      |
| 5.74E-02 | 9.54E-01 | -1.25 | 2.83E-02 | NM_032853       | Hs.515016 | MUM1        |
| 3.36E-02 | 1.08E-01 | -1.25 | 4.84E-05 | NM_004277       | Hs.40510  | SLC25A27    |
| 8.49E-01 | 2.58E-01 | -1.25 | 7.02E-04 | NM_001039948    | Hs.474397 | SGSM1       |
| 8.79E-01 | 2.52E-02 | -1.25 | 4.23E-02 | NM_020659       | Hs.268728 | TTYH1       |
| 5.57E-01 | 3.29E-02 | -1.25 | 1.08E-02 | NM_001106       | Hs.174273 | ACVR2B      |
| 8.81E-01 | 2.92E-02 | 1.25  | 1.48E-02 | NM_020715       | Hs.594236 | PLEKHH1     |
| 4.66E-03 | 1.96E-01 | 1.25  | 1.76E-05 | NM_022740       | Hs.397465 | HIPK2       |
| 8.02E-02 | 4.71E-01 | -1.25 | 3.87E-02 | NM_138409       | Hs.370055 | C6orf117    |
| 2.79E-01 | 1.21E-01 | -1.25 | 3.32E-02 | NM_002606       | Hs.473927 | PDE9A       |
| 8.91E-02 | 3.46E-02 | -1.25 | 1.22E-06 | NM_005612       | Hs.631513 | REST        |
| 4.15E-01 | 1.87E-02 | 1.25  | 6.91E-03 | NM_023112       | Hs.278815 | OTUB2       |
| 5.79E-04 | 1.77E-01 | -1.25 | 1.80E-04 | AK131288        | Hs.710569 | LOC10013331 |
| 3.10E-01 | 5.48E-01 | 1.25  | 2.95E-02 | M87790          | Hs.449585 |             |
| 2.16E-01 | 3.83E-02 | 1.25  | 1.45E-03 | NM_173076       | Hs.134585 | ABCA12      |
| 4.34E-01 | 1.35E-01 | -1.25 | 1.99E-02 | NM_002483       | Hs.466814 | CEACAM6     |
| 8.08E-03 | 5.19E-02 | 1.25  | 9.61E-07 | NM_004278       | Hs.499793 | PIGL        |
| 7.50E-01 | 5.72E-03 | -1.25 | 2.93E-02 | AK090418        | Hs.559040 | LOC349196   |
| 3.72E-02 | 6.62E-01 | -1.25 | 1.90E-02 |                 |           |             |
| 1.50E-02 | 9.17E-01 | -1.25 | 1.42E-03 | NM_014710       | Hs.710048 | GPRASP1     |
| 6.47E-02 | 2.25E-01 | 1.25  | 2.61E-03 | NM_004694       | Hs.42645  | SLC16A6     |
| 1.30E-02 | 7.21E-02 | -1.25 | 2.01E-03 | NM_173550       | Hs.17267  | C9orf93     |
| 1.50E-02 | 4.59E-01 | -1.25 | 1.43E-02 | NM_130759       | Hs.647087 | GIMAP1      |
| 1.84E-01 | 2.49E-01 | -1.25 | 1.30E-06 | BC042034        | Hs.592178 | C7orf46     |
| 5.58E-03 | 7.78E-02 | 1.25  | 4.33E-02 | THC2695815      |           |             |
| 1.64E-02 | 4.26E-03 | -1.25 | 4.34E-03 | ENST00000361453 | Hs.631494 | ND2         |
| 8.54E-02 | 1.48E-01 | -1.25 | 1.02E-02 | NM_001547       | Hs.437609 | IFIT2       |
| 5.04E-03 | 1.69E-01 | -1.25 | 1.74E-03 | NM_000633       | Hs.150749 | BCL2        |
| 7.48E-01 | 7.48E-02 | 1.25  | 6.49E-04 | NM_001039547    | Hs.135904 | GK5         |
| 8.08E-03 | 1.52E-01 | -1.25 | 2.76E-02 | NM_000700       | Hs.494173 | ANXA1       |
| 2.18E-02 | 5.61E-02 | -1.25 | 2.52E-03 | NM_153609       | Hs.370885 | TMPRSS6     |
| 1.48E-02 | 3.01E-01 | 1.25  | 3.99E-02 | AK130741        | Hs.347034 |             |

|          |          |       |          |              |           |           |
|----------|----------|-------|----------|--------------|-----------|-----------|
| 6.34E-01 | 9.86E-03 | -1.25 | 2.57E-03 | NM_006777    | Hs.143604 | ZBTB33    |
| 2.91E-01 | 3.04E-03 | -1.25 | 3.42E-02 | NM_005645    | Hs.632426 | TAF13     |
| 5.94E-03 | 5.25E-01 | 1.25  | 6.13E-04 |              |           |           |
| 1.11E-01 | 2.14E-01 | -1.25 | 1.20E-03 | NM_002193    | Hs.1735   | INHBB     |
| 1.81E-01 | 5.83E-01 | -1.24 | 3.72E-02 | NM_001080412 | Hs.518301 | ZBTB38    |
| 2.14E-03 | 6.65E-03 | 1.24  | 4.64E-02 | XM_292021    | Hs.282121 | LOC341346 |
| 5.24E-02 | 2.20E-02 | 1.24  | 9.61E-03 | CR749646     | Hs.491354 | EXTL3     |
| 4.95E-03 | 1.50E-02 | -1.24 | 1.72E-04 |              |           |           |
| 6.99E-02 | 8.53E-01 | -1.24 | 2.77E-02 | NM_025190    | Hs.532921 | ANKRD36B  |
| 6.29E-01 | 4.77E-01 | 1.24  | 3.47E-02 | BC008001     | Hs.570804 |           |
| 6.78E-03 | 1.31E-02 | 1.24  | 1.79E-02 | NM_001407    | Hs.631926 | CELSR3    |
| 2.51E-02 | 5.94E-02 | 1.24  | 2.06E-02 | NM_020959    | Hs.590990 | TMEM16H   |
| 4.56E-01 | 3.00E-01 | -1.24 | 1.88E-02 | NM_014571    | Hs.472566 | HEYL      |
| 8.46E-01 | 6.30E-02 | -1.24 | 1.11E-02 | NM_182529    | Hs.650237 | THAP5     |
| 1.52E-03 | 4.12E-02 | -1.24 | 2.55E-02 | NM_001733    | Hs.524224 | C1R       |
| 6.58E-03 | 6.18E-01 | -1.24 | 5.68E-03 | NM_001080412 | Hs.518301 | ZBTB38    |
| 2.18E-04 | 6.42E-02 | -1.24 | 4.99E-03 | NM_006738    | Hs.459211 | AKAP13    |
| 2.21E-01 | 9.51E-02 | -1.24 | 3.05E-02 | AA045093     | Hs.130438 |           |
| 5.08E-03 | 1.10E-01 | -1.24 | 9.79E-03 | NM_002310    | Hs.133421 | LIFR      |
| 5.94E-03 | 4.31E-02 | 1.24  | 1.27E-02 | NM_006675    | Hs.504517 | TSPAN9    |
| 2.89E-01 | 1.46E-01 | -1.24 | 1.20E-03 | NM_003355    | Hs.80658  | UCP2      |
| 1.71E-01 | 5.82E-03 | 1.24  | 3.80E-02 | AB071195     |           | BCL2L11   |
| 3.78E-03 | 6.01E-01 | 1.24  | 2.19E-02 | NM_001080472 | Hs.632269 | C20orf142 |
| 3.15E-03 | 3.30E-02 | 1.24  | 1.31E-02 | AK094466     | Hs.655875 | TSEN54    |
| 2.89E-02 | 4.36E-04 | 1.24  | 1.09E-04 | NM_018103    | Hs.482087 | LRRC8D    |
| 5.38E-03 | 2.34E-01 | 1.24  | 7.48E-08 | NM_152384    | Hs.233398 | BBS5      |
| 9.27E-01 | 1.27E-02 | -1.24 | 4.81E-02 | NM_002198    | Hs.436061 | IRF1      |
| 1.05E-04 | 2.64E-01 | -1.24 | 2.25E-02 | NM_001920    | Hs.706840 | DCN       |
| 7.84E-02 | 5.11E-01 | 1.24  | 1.78E-03 | NM_207380    | Hs.32433  | C15orf52  |
| 1.20E-04 | 8.06E-02 | -1.24 | 4.51E-02 | NM_001992    | Hs.482562 | F2R       |
| 2.56E-02 | 1.14E-01 | -1.24 | 5.51E-06 | NM_032470    | Hs.485104 | TNXB      |
| 8.08E-01 | 9.48E-02 | -1.24 | 2.01E-03 | NM_181644    | Hs.567714 | MFSD4     |
| 9.62E-03 | 1.40E-02 | 1.24  | 1.15E-10 | BC034571     | Hs.380225 | PLA2G4D   |
| 1.04E-04 | 6.98E-02 | 1.24  | 7.76E-04 | BC014983     |           | TBC1D20   |
| 3.22E-01 | 5.88E-01 | 1.24  | 2.62E-02 | BC030778     | Hs.515951 | SH3YL1    |
| 7.44E-02 | 1.07E-01 | -1.24 | 9.58E-03 | NM_144974    | Hs.170849 | CCDC122   |
| 8.33E-03 | 1.44E-02 | 1.24  | 7.35E-03 | AK000707     |           |           |
| 2.43E-01 | 5.24E-02 | -1.24 | 1.38E-04 | THC2535223   |           |           |
| 6.32E-02 | 6.07E-01 | 1.24  | 8.63E-04 |              |           |           |
| 8.57E-02 | 1.91E-01 | -1.24 | 5.22E-03 | NM_001848    | Hs.474053 | COL6A1    |
| 1.12E-04 | 5.53E-02 | 1.24  | 4.88E-02 | AK125672     | Hs.592102 |           |
| 1.59E-01 | 7.31E-03 | -1.24 | 2.20E-04 | THC2542194   |           |           |
| 2.36E-05 | 4.66E-01 | 1.24  | 2.15E-02 | BC004449     | Hs.153629 | MEF2B     |
| 2.09E-03 | 3.20E-02 | 1.24  | 5.11E-03 | NM_003273    | Hs.31130  | TM7SF2    |
| 1.50E-02 | 3.42E-01 | 1.24  | 2.00E-02 | NM_017556    | Hs.530101 | FBLIM1    |
| 9.60E-02 | 8.76E-03 | 1.24  | 8.89E-05 | BC013792     | Hs.199763 |           |
| 4.64E-01 | 1.62E-01 | 1.24  | 4.40E-03 | NM_013332    | Hs.710088 | HIG2      |

|          |          |       |          |              |           |           |
|----------|----------|-------|----------|--------------|-----------|-----------|
| 5.56E-02 | 2.26E-02 | -1.24 | 6.03E-08 | NM_021963    | Hs.66180  | NAP1L2    |
| 1.89E-01 | 2.30E-01 | 1.24  | 7.56E-03 |              |           |           |
| 6.53E-01 | 2.18E-02 | -1.24 | 5.22E-03 | NM_002162    | Hs.654563 | ICAM3     |
| 2.67E-01 | 3.95E-01 | 1.24  | 9.98E-04 | NM_001025366 | Hs.73793  | VEGFA     |
| 8.85E-02 | 9.87E-02 | 1.24  | 1.15E-07 | THC2659519   |           |           |
| 6.71E-02 | 1.54E-01 | -1.24 | 4.95E-13 | NM_053056    | Hs.523852 | CCND1     |
| 8.09E-02 | 8.84E-01 | -1.24 | 1.54E-03 | NM_004816    | Hs.118003 | C9orf61   |
| 2.10E-02 | 8.95E-01 | 1.24  | 1.29E-02 | AK125225     | Hs.306212 | ATP8B3    |
| 5.97E-03 | 6.56E-01 | -1.24 | 9.22E-03 | NM_000898    | Hs.654473 | MAOB      |
| 5.76E-02 | 1.40E-02 | -1.24 | 1.24E-04 | CR591210     | Hs.476082 |           |
| 2.71E-01 | 1.73E-01 | 1.24  | 3.26E-02 |              |           |           |
| 3.30E-02 | 2.47E-01 | -1.24 | 4.72E-04 | NM_024302    | Hs.380710 | MMP28     |
| 1.23E-02 | 4.79E-02 | 1.24  | 3.73E-03 | BC034222     | Hs.410316 | HRASLS5   |
| 8.88E-02 | 4.73E-01 | -1.24 | 1.46E-06 | NM_003436    | Hs.85863  | ZNF135    |
| 1.78E-02 | 2.16E-01 | -1.24 | 8.76E-03 | NM_001943    | Hs.412597 | DSG2      |
| 2.66E-02 | 2.76E-02 | -1.24 | 4.81E-02 | NM_003514    | Hs.134999 | HIST1H2AM |
| 1.38E-01 | 8.00E-03 | 1.24  | 5.43E-03 | AK123107     | Hs.558076 |           |
| 9.82E-01 | 4.61E-01 | -1.24 | 7.16E-03 |              |           |           |
| 4.93E-01 | 8.30E-02 | 1.24  | 1.14E-02 | AK000041     | Hs.675410 | C14orf113 |
| 4.46E-01 | 1.06E-01 | -1.24 | 3.36E-03 | NM_004210    | Hs.594708 | NEURL     |
| 1.74E-01 | 2.39E-02 | 1.24  | 1.02E-02 | NM_022726    | Hs.101915 | ELOVL4    |
| 2.37E-02 | 6.60E-02 | -1.24 | 1.11E-03 | AK055438     | Hs.660989 |           |
| 7.52E-03 | 6.49E-02 | 1.23  | 1.85E-02 | NM_057178    | Hs.13680  | RFFL      |
| 6.87E-02 | 5.40E-03 | -1.23 | 8.77E-03 |              |           |           |
| 1.85E-01 | 7.15E-03 | -1.23 | 2.87E-04 | THC2595309   |           |           |
| 7.90E-01 | 2.17E-02 | -1.23 | 3.80E-03 | NM_015568    | Hs.45719  | PPP1R16B  |
| 1.48E-01 | 1.99E-01 | 1.23  | 2.51E-02 | AK022393     | Hs.661121 | FLJ12331  |
| 5.05E-01 | 9.40E-01 | -1.23 | 7.72E-03 | BC020226     |           | HLA-DOB   |
| 3.84E-01 | 2.67E-03 | 1.23  | 9.15E-03 | NM_017573    | Hs.46884  | PCSK4     |
| 3.99E-04 | 2.04E-01 | -1.23 | 3.18E-02 | NM_152999    | Hs.489051 | STEAP2    |
| 2.63E-01 | 5.15E-02 | -1.23 | 2.34E-03 | NM_003246    | Hs.164226 | THBS1     |
| 3.94E-01 | 3.75E-01 | -1.23 | 3.35E-02 | NM_001465    | Hs.370503 | FYB       |
| 1.15E-01 | 2.54E-01 | -1.23 | 2.75E-04 | CX788817     | Hs.120377 |           |
| 2.23E-01 | 5.16E-01 | -1.23 | 2.20E-02 | THC2667205   |           |           |
| 4.31E-01 | 2.57E-01 | 1.23  | 3.25E-02 | NM_031413    | Hs.658723 | CECR2     |
| 2.48E-01 | 6.41E-01 | 1.23  | 3.76E-02 | CR627452     | Hs.474233 | C22orf25  |
| 1.67E-03 | 2.92E-01 | -1.23 | 4.44E-02 | NM_016613    | Hs.567498 | C4orf18   |
| 7.99E-03 | 1.85E-02 | -1.23 | 1.86E-03 | NM_002923    | Hs.78944  | RGS2      |
| 1.27E-01 | 3.54E-04 | -1.23 | 8.39E-03 | NM_002116    | Hs.181244 | HLA-A     |
| 2.84E-02 | 7.54E-04 | 1.23  | 1.02E-02 | NM_004577    | Hs.512656 | PSPH      |
| 1.58E-02 | 4.32E-02 | 1.23  | 1.70E-02 | BC001743     |           | C7orf44   |
| 6.64E-01 | 2.09E-01 | -1.23 | 3.10E-02 | NM_182603    | Hs.503438 | ANKRD42   |
| 2.00E-02 | 2.82E-02 | -1.23 | 3.98E-02 | NM_005406    | Hs.706819 | ROCK1     |
| 1.87E-01 | 3.10E-01 | 1.23  | 3.50E-02 |              |           |           |
| 1.15E-02 | 4.43E-02 | -1.23 | 4.84E-03 | NM_018013    | Hs.445244 | SOBP      |
| 8.70E-01 | 1.57E-01 | -1.23 | 3.46E-02 | NM_032782    | Hs.710500 | HAVCR2    |
| 3.61E-01 | 4.17E-02 | 1.23  | 1.33E-02 | NM_000386    | Hs.371914 | BLMH      |

|          |          |       |          |                 |           |           |
|----------|----------|-------|----------|-----------------|-----------|-----------|
| 5.34E-03 | 9.84E-03 | 1.23  | 1.54E-02 | NM_000135       | Hs.567267 | FANCA     |
| 1.27E-01 | 1.03E-02 | 1.23  | 2.07E-03 | THC2737176      | Hs.670210 |           |
| 1.20E-01 | 1.90E-01 | 1.23  | 4.36E-09 | CR601458        | Hs.8379   | FAM110C   |
| 9.75E-01 | 7.50E-02 | -1.23 | 1.40E-05 | NM_001010879    | Hs.454830 | ZIK1      |
| 1.81E-02 | 2.34E-02 | -1.23 | 1.13E-05 | NM_000958       | Hs.199248 | PTGER4    |
| 2.43E-02 | 3.73E-01 | 1.23  | 2.85E-02 | NM_006695       | Hs.500197 | RUNDC3A   |
| 3.18E-01 | 5.48E-01 | 1.23  | 5.15E-04 | NM_005061       | Hs.657266 | RPL3L     |
| 2.69E-01 | 3.65E-01 | -1.23 | 1.71E-02 | NM_017551       | Hs.530653 | GRID1     |
| 5.76E-03 | 5.27E-01 | 1.23  | 3.54E-02 | NM_000710       | Hs.525572 | BDKRB1    |
| 1.09E-01 | 3.50E-02 | 1.23  | 4.09E-04 | BX640843        | Hs.128803 |           |
| 7.98E-01 | 4.35E-02 | -1.23 | 1.11E-02 | NM_198887       | Hs.510375 | NUP43     |
| 4.51E-01 | 9.29E-01 | -1.23 | 5.60E-04 | NM_000779       | Hs.436317 | CYP4B1    |
| 1.87E-01 | 1.97E-01 | -1.23 | 2.90E-02 | NM_032591       | Hs.496057 | SLC9A7    |
| 9.55E-05 | 6.63E-02 | 1.23  | 3.57E-02 | NM_032704       | Hs.652390 | TUBA1C    |
| 7.78E-01 | 1.51E-01 | -1.23 | 6.97E-05 | NM_020776       | Hs.4045   | KIAA1328  |
| 7.62E-01 | 2.78E-04 | 1.23  | 4.15E-02 | NM_000496       | Hs.373074 | CRYBB2    |
| 2.36E-01 | 2.71E-01 | -1.23 | 1.65E-03 | NM_000201       | Hs.707983 | ICAM1     |
| 5.38E-01 | 3.82E-01 | -1.23 | 1.32E-02 | NM_138290       | Hs.411488 | RUNDC3B   |
| 5.26E-04 | 1.98E-01 | -1.23 | 6.25E-03 | NM_000063       | Hs.408903 | C2        |
| 1.10E-02 | 6.54E-01 | -1.23 | 9.98E-03 | NM_024800       | Hs.657336 | NEK11     |
| 1.94E-02 | 5.11E-01 | 1.23  | 3.17E-03 | NM_178422       | Hs.523652 | PAQR7     |
| 9.72E-03 | 2.61E-03 | 1.23  | 2.79E-02 | AK123430        | Hs.445496 | MAP3K9    |
| 5.24E-01 | 4.08E-02 | 1.23  | 2.05E-02 | THC2614203      |           |           |
| 3.78E-02 | 7.32E-03 | 1.23  | 1.94E-03 | NM_018000       | Hs.709755 | MREG      |
| 7.38E-02 | 1.63E-01 | 1.23  | 3.67E-03 | BC007606        | Hs.700219 |           |
| 9.60E-02 | 4.13E-02 | 1.23  | 1.17E-02 | NM_025182       | Hs.301696 | KIAA1539  |
| 3.75E-01 | 5.43E-01 | 1.23  | 1.70E-02 | NM_153618       | Hs.511265 | SEMA6D    |
| 3.65E-01 | 5.45E-01 | 1.23  | 2.25E-02 | BC014505        | Hs.709178 | MLLT4     |
| 5.16E-01 | 3.70E-02 | 1.23  | 1.69E-02 | NM_133367       | Hs.239388 | PAQR8     |
| 6.63E-01 | 5.40E-02 | -1.23 | 2.91E-02 | NM_004118       | Hs.516971 | FOXS1     |
| 1.86E-01 | 2.01E-02 | 1.23  | 1.95E-02 | NM_024563       | Hs.13528  | C5orf23   |
| 1.33E-01 | 4.84E-02 | -1.23 | 3.55E-02 | NM_014832       | Hs.210891 | TBC1D4    |
| 1.15E-02 | 8.10E-01 | -1.23 | 2.68E-02 | NM_032606       | Hs.407154 | CAPS2     |
| 6.46E-01 | 7.59E-01 | 1.23  | 6.42E-03 | NM_003541       | Hs.528055 | HIST1H4K  |
| 3.52E-01 | 1.49E-01 | -1.23 | 4.23E-02 | NM_016205       | Hs.570855 | PDGFC     |
| 7.92E-02 | 1.97E-01 | 1.23  | 1.05E-02 |                 |           |           |
| 1.57E-01 | 2.99E-01 | -1.23 | 4.79E-04 | NM_003265       | Hs.657724 | TLR3      |
| 9.37E-03 | 4.89E-01 | 1.23  | 1.26E-03 | NM_182492       | Hs.710309 | LRP5L     |
| 1.70E-02 | 2.26E-01 | -1.23 | 1.36E-03 | NM_153223       | Hs.483209 | CCDC100   |
| 4.71E-02 | 6.17E-01 | 1.23  | 1.29E-02 | NM_017789       | Hs.516220 | SEMA4C    |
| 9.40E-02 | 2.93E-02 | 1.23  | 2.85E-02 | THC2584954      | Hs.158497 |           |
| 3.31E-02 | 1.48E-01 | 1.23  | 3.59E-02 |                 |           |           |
| 4.47E-01 | 3.92E-02 | -1.23 | 1.66E-02 | NM_001964       | Hs.326035 | EGR1      |
| 4.30E-02 | 4.86E-01 | -1.23 | 3.49E-03 | ENST00000375280 | Hs.443729 | LOC285141 |
| 1.18E-02 | 4.52E-01 | 1.23  | 3.22E-03 | NM_005185       | Hs.239600 | CALML3    |
| 6.72E-03 | 6.40E-01 | 1.23  | 4.78E-02 | NM_006670       | Hs.82128  | TPBG      |
| 7.79E-02 | 1.18E-01 | -1.23 | 2.65E-04 | NM_172088       | Hs.54673  | TNFSF13   |

|          |          |       |          |                 |           |             |
|----------|----------|-------|----------|-----------------|-----------|-------------|
| 3.17E-01 | 1.47E-01 | -1.23 | 6.76E-04 | NM_032427       | Hs.428214 | MAML2       |
| 2.60E-01 | 1.62E-01 | -1.23 | 5.92E-03 | NM_181482       | Hs.149363 | C18orf1     |
| 5.38E-01 | 5.15E-01 | -1.23 | 1.66E-03 | NM_015288       | Hs.483419 | PHF15       |
| 6.23E-02 | 5.66E-01 | -1.23 | 1.21E-02 | NM_005408       | Hs.414629 | CCL13       |
| 1.39E-01 | 3.92E-01 | -1.23 | 1.30E-02 | NM_021998       | Hs.326801 | ZNF711      |
| 1.43E-01 | 4.48E-01 | -1.23 | 1.51E-02 | NM_052818       | Hs.161220 | N4BP2L1     |
| 6.71E-01 | 1.61E-03 | 1.23  | 4.84E-02 | NM_005155       | Hs.635690 | PPT2        |
| 2.40E-02 | 4.45E-03 | 1.23  | 4.08E-02 |                 |           |             |
| 9.30E-01 | 3.83E-01 | -1.23 | 2.91E-04 | NM_007356       | Hs.62022  | LAMB4       |
| 5.97E-01 | 2.53E-02 | 1.23  | 9.01E-03 | NM_181581       | Hs.97627  | DUS4L       |
| 9.37E-01 | 3.91E-03 | -1.23 | 4.44E-02 | BC050737        | Hs.654587 | SMA4        |
| 8.66E-01 | 4.01E-02 | 1.22  | 4.04E-02 | NM_006033       | Hs.465102 | LIPG        |
| 5.60E-03 | 5.54E-02 | -1.22 | 1.40E-03 | NM_014880       | Hs.709212 | CD302       |
| 8.76E-03 | 1.50E-01 | 1.22  | 5.50E-04 | AF086305        | Hs.660199 | ZNF286A     |
| 1.67E-01 | 3.28E-01 | -1.22 | 3.88E-04 | AB032989        | Hs.709892 | AMIGO1      |
| 1.42E-01 | 1.98E-01 | 1.22  | 1.83E-02 | NM_005557       | Hs.655160 | KRT16       |
| 6.34E-02 | 9.74E-01 | 1.22  | 2.56E-03 | NM_018667       | Hs.368421 | SMPD3       |
| 1.09E-01 | 4.40E-02 | 1.22  | 4.00E-02 | NM_002016       | Hs.654510 | FLG         |
| 1.78E-01 | 1.45E-01 | 1.22  | 1.57E-03 | BC012888        | Hs.222055 | NDST1       |
| 2.25E-02 | 1.19E-02 | 1.22  | 1.41E-03 | NM_033429       | Hs.709550 | CALML4      |
| 1.91E-01 | 9.55E-02 | -1.22 | 3.55E-04 | NM_020817       | Hs.477159 | KIAA1407    |
| 4.97E-01 | 1.13E-01 | 1.22  | 2.33E-02 | AK131087        |           | POL3S       |
| 8.81E-02 | 3.31E-01 | -1.22 | 4.65E-02 | ENST00000344538 | Hs.633153 | LOC375010   |
| 1.80E-02 | 2.50E-03 | -1.22 | 5.32E-03 | NM_005345       | Hs.520028 | HSPA1A      |
| 1.22E-03 | 1.95E-01 | 1.22  | 2.53E-02 | NM_005213       | Hs.518198 | CSTA        |
| 1.15E-01 | 3.01E-02 | 1.22  | 4.98E-02 | NM_007173       | Hs.25338  | PRSS23      |
| 4.68E-03 | 3.58E-01 | -1.22 | 1.43E-05 | ENST00000376347 | Hs.651407 |             |
| 9.67E-01 | 8.67E-01 | 1.22  | 1.53E-02 | NM_014211       | Hs.26225  | GABRP       |
| 1.24E-01 | 6.60E-01 | 1.22  | 2.41E-03 | AK025323        | Hs.671557 |             |
| 9.25E-02 | 2.32E-02 | 1.22  | 2.05E-02 | AL512694        | Hs.556986 | NADSYN1     |
| 1.97E-01 | 5.96E-01 | 1.22  | 1.62E-03 | NM_145274       | Hs.353163 | TMEM99      |
| 3.29E-02 | 5.35E-01 | -1.22 | 1.21E-02 | NM_007021       | Hs.93675  | C10orf10    |
| 4.61E-03 | 1.06E-01 | -1.22 | 5.25E-07 | NM_005574       | Hs.34560  | LMO2        |
| 8.75E-02 | 7.28E-01 | 1.22  | 4.64E-03 | AK098478        | Hs.683792 | LOC10013025 |
| 1.73E-04 | 8.19E-02 | 1.22  | 1.72E-02 | NM_018306       | Hs.475502 | TMEM40      |
| 2.76E-01 | 8.62E-01 | -1.22 | 3.03E-02 | NM_000960       | Hs.458324 | PTGIR       |
| 7.19E-01 | 1.53E-01 | 1.22  | 2.64E-02 | NM_000391       | Hs.523454 | TPP1        |
| 8.45E-03 | 1.66E-02 | 1.22  | 4.16E-02 | NM_130776       | Hs.43879  | XAGE3       |
| 3.09E-01 | 5.37E-02 | -1.22 | 5.25E-04 | ENST00000344759 | Hs.444446 |             |
| 2.34E-02 | 5.18E-01 | -1.22 | 2.96E-03 | NM_001040440    | Hs.436121 | CCDC112     |
| 6.79E-02 | 6.10E-03 | -1.22 | 7.37E-03 | NM_001259       | Hs.119882 | CDK6        |
| 9.61E-01 | 2.50E-01 | -1.22 | 1.86E-03 | NM_003726       | Hs.316931 | SKAP1       |
| 1.49E-01 | 1.15E-01 | 1.22  | 3.08E-02 | AI682237        | Hs.439122 |             |
| 2.69E-02 | 1.50E-01 | -1.22 | 1.87E-03 | NM_032217       | Hs.601206 | ANKRD17     |
| 9.34E-01 | 2.61E-01 | 1.22  | 4.55E-02 | NM_002272       | Hs.654610 | KRT4        |
| 7.98E-01 | 4.13E-01 | 1.22  | 2.29E-02 | NM_206967       | Hs.461655 | C16orf74    |
| 2.65E-02 | 9.40E-01 | 1.22  | 3.43E-02 | NM_004694       | Hs.42645  | SLC16A6     |



|          |          |       |          |                 |           |           |
|----------|----------|-------|----------|-----------------|-----------|-----------|
| 2.79E-01 | 1.11E-01 | -1.22 | 4.12E-03 | NM_019885       | Hs.91546  | CYP26B1   |
| 4.77E-01 | 2.01E-01 | 1.22  | 3.08E-02 | NM_012319       | Hs.79136  | SLC39A6   |
| 1.76E-01 | 8.74E-01 | -1.22 | 1.91E-03 |                 |           |           |
| 3.67E-04 | 9.61E-02 | -1.22 | 4.34E-02 | NM_152261       | Hs.257664 | C12orf23  |
| 4.24E-03 | 3.77E-03 | 1.22  | 1.23E-02 | NM_001006946    | Hs.224607 | SDC1      |
| 6.34E-01 | 9.87E-01 | -1.22 | 4.60E-03 | NM_020911       | Hs.511454 | PLXNA4    |
| 4.07E-01 | 5.42E-01 | -1.22 | 1.98E-02 | NM_013322       | Hs.571296 | SNX10     |
| 6.73E-03 | 4.42E-02 | 1.22  | 2.00E-04 | THC2525505      |           |           |
| 4.90E-02 | 1.04E-01 | 1.22  | 3.35E-03 |                 |           |           |
| 4.37E-01 | 2.09E-02 | -1.22 | 3.35E-03 | NM_004747       | Hs.654829 | DLG5      |
| 1.27E-02 | 6.52E-03 | 1.22  | 1.47E-02 | AK097197        | Hs.514590 | HGS       |
| 3.18E-02 | 8.81E-03 | 1.22  | 3.76E-02 | BC004179        | Hs.667436 | MGC2780   |
| 1.71E-02 | 1.62E-03 | -1.22 | 1.60E-06 | NM_021156       | Hs.169358 | TXNDC13   |
| 3.60E-02 | 7.93E-01 | -1.22 | 4.29E-05 | NM_001311       | Hs.70327  | CRIP1     |
| 8.91E-01 | 1.02E-02 | -1.22 | 4.73E-02 | AX721087        |           |           |
| 2.23E-02 | 9.65E-01 | -1.22 | 3.61E-02 | BC030122        | Hs.559426 |           |
| 6.82E-02 | 4.65E-02 | 1.22  | 3.71E-02 | AK023048        | Hs.54713  | FLJ12986  |
| 6.86E-02 | 5.35E-01 | 1.22  | 1.70E-03 | NM_003953       | Hs.493919 | MPZL1     |
| 1.12E-01 | 3.88E-01 | -1.22 | 1.77E-05 | THC2676635      |           |           |
| 3.02E-02 | 2.52E-02 | 1.22  | 2.29E-04 | H12329          | Hs.519880 |           |
| 2.20E-02 | 1.30E-01 | 1.22  | 3.59E-02 | AK094407        | Hs.683873 | LOC645427 |
| 2.02E-03 | 9.56E-02 | 1.22  | 1.46E-02 | ENST00000307394 | Hs.7247   | EME2      |
| 4.14E-03 | 7.92E-02 | 1.22  | 6.32E-03 | NM_152574       | Hs.563630 | C9orf52   |
| 3.41E-02 | 5.55E-02 | -1.22 | 2.84E-02 | NM_015384       | Hs.481927 | NIPBL     |
| 9.76E-04 | 1.23E-01 | -1.22 | 3.02E-02 | M74720          | Hs.644653 |           |
| 6.98E-01 | 1.50E-01 | -1.22 | 4.82E-02 | THC2752681      |           |           |
| 4.89E-01 | 2.20E-01 | -1.22 | 1.74E-06 | NM_000024       | Hs.591251 | ADRB2     |
| 8.09E-03 | 1.61E-02 | 1.22  | 1.76E-04 | NM_020964       | Hs.514843 | KIAA1632  |
| 2.69E-01 | 7.64E-01 | 1.22  | 1.34E-02 | NM_001005209    | Hs.446664 | TMEM198   |
| 5.83E-03 | 4.21E-02 | 1.22  | 3.20E-02 |                 |           |           |
| 1.86E-01 | 6.53E-03 | 1.22  | 2.33E-02 | NM_212559       | Hs.592216 | XKRX      |
| 2.96E-02 | 6.37E-01 | -1.22 | 1.85E-03 | NM_002448       | Hs.424414 | MSX1      |
| 1.12E-01 | 4.03E-01 | 1.22  | 4.91E-02 | NM_005532       | Hs.532634 | IFI27     |
| 8.60E-04 | 1.02E-02 | -1.22 | 2.37E-02 | NM_021913       | Hs.590970 | AXL       |
| 3.34E-03 | 7.51E-01 | 1.22  | 4.82E-02 | NR_003611       | Hs.652450 | BMS1P5    |
| 3.06E-03 | 6.12E-01 | 1.22  | 3.13E-02 | NM_002648       | Hs.81170  | PIM1      |
| 2.61E-03 | 1.74E-01 | 1.22  | 1.14E-02 | NM_002735       | Hs.520851 | PRKAR1B   |
| 3.67E-02 | 1.44E-03 | -1.22 | 2.97E-02 | AL117530        | Hs.146346 | LOC729085 |
| 3.81E-01 | 1.39E-02 | 1.22  | 3.35E-02 | NM_147780       | Hs.520898 | CTSB      |
| 3.67E-02 | 2.43E-01 | -1.22 | 2.22E-02 | NM_053276       | Hs.137415 | VIT       |
| 3.16E-02 | 8.76E-01 | 1.22  | 3.35E-02 | NM_001002876    | Hs.208912 | CENPM     |
| 9.06E-02 | 6.92E-01 | 1.22  | 3.55E-08 | NM_012445       | Hs.302963 | SPON2     |
| 1.43E-03 | 2.00E-01 | -1.22 | 2.54E-02 | ENST00000327423 | Hs.438906 |           |
| 5.11E-01 | 4.48E-02 | 1.22  | 2.01E-02 |                 |           |           |
| 9.72E-01 | 3.52E-02 | 1.22  | 4.15E-02 | NM_024830       | Hs.368853 | LPCAT1    |
| 1.95E-01 | 9.82E-02 | -1.22 | 6.34E-03 | NM_017759       | Hs.445036 | FLJ20309  |
| 2.54E-03 | 4.24E-01 | -1.22 | 1.75E-02 | NM_013960       | Hs.453951 | NRG1      |

|          |          |       |          |                 |           |            |
|----------|----------|-------|----------|-----------------|-----------|------------|
| 1.00E-02 | 8.76E-01 | 1.22  | 5.48E-03 | CA314451        | Hs.369574 |            |
| 8.44E-03 | 1.23E-01 | -1.22 | 2.39E-02 | NM_021785       | Hs.708804 | RAI2       |
| 5.47E-01 | 9.12E-03 | 1.22  | 3.24E-02 |                 |           |            |
| 4.96E-03 | 8.80E-01 | 1.22  | 3.73E-03 | NM_007238       | Hs.654857 | PXMP4      |
| 1.01E-01 | 1.10E-01 | 1.22  | 1.71E-04 | NM_018252       | Hs.445386 | TMEM206    |
| 9.45E-01 | 1.20E-02 | 1.22  | 4.03E-03 | NM_014384       | Hs.14791  | ACAD8      |
| 9.66E-01 | 1.77E-02 | -1.22 | 1.57E-03 | CR627122        | Hs.291319 |            |
| 9.93E-06 | 2.27E-02 | -1.22 | 7.82E-04 | ENST00000391372 |           |            |
| 2.04E-01 | 8.45E-04 | 1.22  | 3.07E-02 | NM_005990       | Hs.519756 | STK10      |
| 7.73E-02 | 4.33E-03 | 1.22  | 1.68E-02 | NM_016352       | Hs.93764  | CPA4       |
| 9.58E-01 | 6.22E-02 | 1.22  | 1.42E-03 | THC2744687      |           |            |
| 4.39E-02 | 6.70E-01 | -1.22 | 1.31E-03 | BC045657        | Hs.656959 | C6orf204   |
| 9.06E-04 | 5.24E-01 | -1.22 | 4.02E-02 | NM_016824       | Hs.501012 | ADD3       |
| 2.13E-04 | 1.14E-01 | 1.22  | 1.40E-02 | NM_033641       | Hs.145586 | COL4A6     |
| 1.75E-01 | 2.61E-01 | -1.22 | 4.66E-03 | NM_018936       | Hs.533023 | PCDHB2     |
| 5.43E-01 | 1.75E-01 | -1.22 | 6.91E-03 | BF213738        | Hs.85201  |            |
| 1.46E-03 | 2.03E-01 | -1.22 | 1.63E-02 | NM_148894       | Hs.444517 | FAM44A     |
| 8.70E-01 | 7.46E-01 | 1.22  | 1.75E-02 | NM_005795       | Hs.470882 | CALCRL     |
| 1.61E-02 | 4.32E-03 | 1.22  | 1.15E-02 | NM_020698       | Hs.370410 | TMCC3      |
| 3.75E-02 | 1.11E-01 | -1.22 | 3.82E-02 | ENST00000372234 |           | ANXA11     |
| 2.55E-03 | 6.68E-02 | -1.22 | 5.94E-03 | NM_002563       | Hs.654526 | P2RY1      |
| 9.16E-01 | 8.53E-03 | 1.22  | 5.05E-04 | NM_015264       | Hs.592207 | C22orf9    |
| 1.45E-01 | 2.73E-01 | 1.22  | 7.71E-03 | AK097085        | Hs.660415 |            |
| 1.50E-04 | 3.91E-01 | 1.22  | 2.26E-02 | NM_003501       | Hs.479122 | ACOX3      |
| 3.37E-02 | 2.51E-03 | 1.21  | 5.28E-03 | NM_021089       | Hs.590941 | ZNF8       |
| 3.59E-02 | 3.65E-02 | -1.21 | 3.63E-02 |                 |           |            |
| 3.70E-01 | 1.02E-01 | 1.21  | 7.28E-03 | BC009264        | Hs.516124 | hCG_181173 |
| 1.76E-03 | 4.07E-03 | 1.21  | 1.16E-03 | NM_198552       | Hs.38516  | FAM89A     |
| 1.65E-02 | 1.40E-02 | 1.21  | 4.13E-02 | NM_145203       | Hs.512897 | CSNK1A1L   |
| 4.42E-02 | 4.01E-02 | -1.21 | 5.40E-03 | NM_173830       | Hs.632616 | C6orf182   |
| 7.64E-01 | 3.67E-02 | -1.21 | 1.02E-03 | NM_001085375    | Hs.447011 | FLJ13137   |
| 9.76E-03 | 3.19E-02 | -1.21 | 9.77E-03 | NM_014059       | Hs.507866 | C13orf15   |
| 4.63E-03 | 4.99E-02 | 1.21  | 1.50E-05 | BC021301        | Hs.657318 | FARP2      |
| 2.55E-01 | 2.44E-02 | 1.21  | 1.97E-03 | NM_014452       | Hs.443577 | TNFRSF21   |
| 2.79E-01 | 2.89E-03 | 1.21  | 3.31E-02 | NM_020148       | Hs.515283 | SPIRE1     |
| 5.35E-01 | 3.27E-01 | -1.21 | 4.71E-02 | U18288          | Hs.701991 | CIITA      |
| 8.73E-01 | 5.20E-01 | 1.21  | 9.02E-03 |                 |           |            |
| 6.65E-01 | 1.77E-01 | -1.21 | 3.49E-03 | NM_024677       | Hs.590923 | NSUN7      |
| 7.78E-01 | 6.53E-02 | -1.21 | 3.71E-02 | XM_001130623    | Hs.116176 | LOC645733  |
| 3.93E-02 | 5.46E-01 | 1.21  | 1.54E-03 | AL833832        |           |            |
| 6.47E-01 | 7.02E-03 | -1.21 | 1.98E-02 | NM_001079846    | Hs.459759 | CREBBP     |
| 8.38E-04 | 2.33E-01 | -1.21 | 4.59E-02 | AK001357        | Hs.675463 |            |
| 2.71E-01 | 3.35E-02 | -1.21 | 4.80E-03 | BC112296        | Hs.529860 |            |
| 7.60E-02 | 9.75E-01 | -1.21 | 1.16E-02 | NM_001547       | Hs.437609 | IFIT2      |
| 1.27E-01 | 2.59E-01 | -1.21 | 2.00E-02 | NM_016524       | Hs.258326 | SYT17      |
| 1.06E-04 | 1.40E-02 | -1.21 | 2.21E-02 | NM_020738       | Hs.9873   | KIDINS220  |
| 6.33E-02 | 1.38E-01 | 1.21  | 1.59E-06 | NM_002165       | Hs.504609 | ID1        |

|          |          |       |          |                 |           |           |
|----------|----------|-------|----------|-----------------|-----------|-----------|
| 1.08E-02 | 2.09E-02 | -1.21 | 3.55E-03 | NM_001300       | Hs.4055   | KLF6      |
| 1.63E-03 | 2.18E-01 | -1.21 | 2.84E-04 | BX538051        | Hs.149540 | LOC730102 |
| 6.32E-01 | 8.40E-02 | -1.21 | 8.18E-03 | NM_130436       | Hs.368240 | DYRK1A    |
| 8.93E-03 | 5.86E-01 | 1.21  | 8.59E-03 | AK022016        | Hs.613667 |           |
| 3.31E-01 | 9.37E-02 | 1.21  | 3.87E-05 | NM_000513       | Hs.247787 | OPN1MW    |
| 2.02E-02 | 7.81E-02 | 1.21  | 2.60E-02 | NM_133329       | Hs.352633 | KCNG3     |
| 5.63E-01 | 1.43E-01 | 1.21  | 1.87E-02 | BF246504        | Hs.632926 |           |
| 1.69E-02 | 8.47E-02 | -1.21 | 2.54E-02 | NM_148894       | Hs.444517 | FAM44A    |
| 5.38E-03 | 4.00E-02 | -1.21 | 1.45E-04 | NM_002349       | Hs.153563 | LY75      |
| 2.07E-01 | 1.13E-01 | 1.21  | 4.20E-03 | THC2663783      |           |           |
| 9.19E-01 | 3.72E-02 | -1.21 | 2.73E-02 | NM_148898       | Hs.656280 | FOXP2     |
| 1.08E-02 | 1.23E-01 | -1.21 | 2.36E-03 | NR_003674       | Hs.439341 | KGFLP1    |
| 5.48E-04 | 2.12E-01 | 1.21  | 1.20E-02 | NM_198253       | Hs.492203 | TERT      |
| 1.60E-02 | 6.29E-01 | 1.21  | 4.87E-02 |                 |           |           |
| 3.89E-03 | 2.46E-01 | 1.21  | 7.08E-03 | NM_001098523    | Hs.90753  | HTATIP2   |
| 3.25E-01 | 7.45E-02 | -1.21 | 3.55E-03 | NM_000958       | Hs.199248 | PTGER4    |
| 5.44E-02 | 5.49E-01 | 1.21  | 4.35E-03 | NM_133456       | Hs.519574 | SHROOM1   |
| 5.34E-01 | 8.92E-03 | 1.21  | 3.21E-03 | NM_032499       | Hs.48348  | C15orf41  |
| 3.66E-03 | 1.99E-01 | 1.21  | 1.69E-02 | BC036762        | Hs.680805 | MGC46336  |
| 9.59E-04 | 2.18E-02 | -1.21 | 2.48E-02 | NM_014059       | Hs.507866 | C13orf15  |
| 4.82E-01 | 3.26E-02 | -1.21 | 2.52E-02 | NM_001002295    | Hs.524134 | GATA3     |
| 5.98E-03 | 1.51E-01 | -1.21 | 1.50E-03 | NM_012330       | Hs.35758  | MYST4     |
| 4.35E-01 | 1.52E-01 | -1.21 | 2.85E-03 | THC2558699      |           |           |
| 2.19E-01 | 1.21E-02 | -1.21 | 2.77E-02 |                 |           |           |
| 3.80E-03 | 2.82E-03 | 1.21  | 1.93E-02 | NM_173490       | Hs.162246 | TMEM171   |
| 1.86E-02 | 9.94E-02 | 1.21  | 3.88E-02 | THC2712447      |           |           |
| 1.55E-01 | 1.74E-01 | 1.21  | 1.13E-03 | AK092751        | Hs.635171 | LOC286254 |
| 6.87E-03 | 4.24E-01 | 1.21  | 1.09E-05 | ENST00000361907 | Hs.659681 | BCOR      |
| 7.68E-02 | 3.46E-01 | -1.21 | 1.37E-02 | NM_002193       | Hs.1735   | INHBB     |
| 2.76E-01 | 3.16E-01 | -1.21 | 2.05E-02 | NM_002090       | Hs.89690  | CXCL3     |
| 1.77E-02 | 9.49E-01 | -1.21 | 1.03E-02 | NM_015672       | Hs.115429 | RIMBP3    |
| 5.64E-03 | 8.85E-01 | -1.21 | 2.61E-02 | NM_053044       | Hs.479119 | HTRA3     |
| 9.38E-03 | 1.48E-01 | 1.21  | 3.72E-02 | U88965          | Hs.667161 | C3orf51   |
| 1.21E-01 | 9.47E-01 | -1.21 | 6.47E-03 | NM_030820       | Hs.47629  | COL21A1   |
| 1.94E-01 | 4.37E-01 | -1.21 | 4.52E-03 | NM_006006       | Hs.591945 | ZBTB16    |
| 3.76E-01 | 5.29E-02 | 1.21  | 4.47E-02 | AF354444        | Hs.650087 |           |
| 1.24E-01 | 2.10E-02 | 1.21  | 2.92E-02 | NM_052925       | Hs.502378 | LENG8     |
| 9.12E-01 | 5.54E-03 | -1.21 | 2.40E-02 | NM_002269       | Hs.182971 | KPNA5     |
| 2.59E-03 | 2.12E-01 | -1.21 | 2.85E-02 | NM_025134       | Hs.59159  | CHD9      |
| 1.57E-01 | 8.32E-02 | 1.21  | 3.94E-05 | BE671182        | Hs.437497 |           |
| 4.02E-01 | 8.49E-03 | 1.21  | 2.94E-02 | THC2708710      |           |           |
| 2.47E-02 | 3.43E-01 | -1.21 | 1.58E-03 | AK123506        | Hs.592801 |           |
| 7.87E-03 | 5.99E-01 | -1.21 | 1.30E-02 | NM_025211       | Hs.522255 | GKAP1     |
| 1.59E-01 | 9.79E-03 | -1.21 | 1.25E-02 | NM_032335       | Hs.356501 | PHF6      |
| 6.34E-02 | 7.73E-01 | -1.21 | 4.44E-04 | NM_019018       | Hs.591751 | FAM105A   |
| 3.65E-02 | 1.17E-01 | -1.21 | 2.12E-02 | AB037817        | Hs.710590 | ZNF471    |
| 1.75E-02 | 3.03E-01 | 1.21  | 8.78E-04 | NM_178520       | Hs.364191 | TMEM105   |

|          |          |       |          |              |           |           |
|----------|----------|-------|----------|--------------|-----------|-----------|
| 2.82E-02 | 7.44E-02 | 1.21  | 4.26E-02 | NM_001374    | Hs.103503 | DNASE1L2  |
| 2.23E-02 | 3.12E-01 | 1.21  | 7.30E-04 | NM_020375    | Hs.504545 | C12orf5   |
| 4.75E-01 | 1.38E-02 | -1.21 | 3.04E-02 | NM_025154    | Hs.438072 | UNC84A    |
| 5.66E-02 | 5.36E-01 | -1.21 | 4.23E-03 | AI379175     | Hs.493819 |           |
| 8.38E-01 | 6.04E-01 | 1.21  | 5.01E-03 | NM_175885    | Hs.448218 | MGC33846  |
| 2.49E-02 | 8.67E-03 | -1.21 | 1.18E-03 | CR602405     | Hs.101840 | MR1       |
| 9.00E-03 | 9.90E-01 | 1.21  | 8.56E-03 |              |           |           |
| 2.47E-01 | 1.08E-02 | 1.21  | 1.33E-02 | NM_020770    | Hs.591464 | CGN       |
| 7.10E-01 | 6.02E-02 | 1.21  | 4.19E-02 | BC006408     | Hs.656558 | ZNF493    |
| 2.12E-02 | 2.68E-03 | -1.21 | 1.41E-02 | NM_007355    | Hs.509736 | HSP90AB1  |
| 6.09E-02 | 2.75E-01 | 1.21  | 1.95E-03 | AK098511     | Hs.633049 |           |
| 2.48E-01 | 3.14E-02 | 1.21  | 5.36E-04 | NM_014726    | Hs.94790  | TBKBP1    |
| 2.82E-01 | 3.26E-02 | -1.21 | 6.07E-03 | NM_144695    | Hs.552608 | C1orf58   |
| 3.20E-02 | 1.97E-01 | 1.21  | 4.51E-02 | THC2705431   |           |           |
| 6.04E-02 | 1.75E-01 | 1.21  | 1.73E-02 |              |           |           |
| 7.61E-03 | 8.96E-02 | -1.21 | 4.06E-04 | NM_005590    | Hs.192649 | MRE11A    |
| 2.13E-02 | 8.57E-01 | 1.21  | 4.79E-02 | AK091621     |           | KIAA0913  |
| 4.33E-02 | 1.59E-02 | -1.21 | 1.36E-03 | NM_058191    | Hs.706813 | C21orf66  |
| 9.03E-03 | 7.27E-01 | 1.21  | 3.87E-02 | THC2689970   |           |           |
| 8.46E-01 | 2.31E-02 | 1.21  | 2.99E-04 | NM_007235    | Hs.85951  | XPOT      |
| 4.38E-01 | 8.33E-02 | -1.21 | 7.14E-03 | NM_024607    | Hs.458513 | PPP1R3B   |
| 5.43E-02 | 6.69E-02 | 1.21  | 2.80E-02 | NM_030940    | Hs.449291 | ISCA1     |
| 9.09E-01 | 2.48E-01 | -1.21 | 1.84E-05 | NM_014266    | Hs.117339 | HCST      |
| 1.36E-01 | 1.21E-03 | -1.21 | 4.24E-02 | BC065040     | Hs.259412 | C1orf63   |
| 2.50E-01 | 5.79E-03 | -1.21 | 3.62E-02 | NM_001034841 | Hs.648523 | LOC162073 |
| 1.00E-01 | 5.75E-01 | 1.21  | 3.35E-02 | NM_005797    | Hs.116651 | MPZL2     |
| 1.23E-01 | 1.24E-01 | 1.21  | 5.79E-05 | NM_030758    | Hs.517546 | OSBP2     |
| 6.05E-01 | 6.44E-02 | 1.21  | 3.00E-03 | AK074160     | Hs.656032 | CDH23     |
| 7.25E-03 | 6.61E-02 | -1.21 | 6.22E-03 | NM_000020    | Hs.591026 | ACVRL1    |
| 5.26E-01 | 9.34E-01 | 1.21  | 4.90E-02 | BC063625     | Hs.406714 | KRTAP2-4  |
| 1.67E-01 | 9.33E-03 | -1.21 | 1.72E-02 | NM_004936    | Hs.72901  | CDKN2B    |
| 5.34E-01 | 1.64E-01 | 1.21  | 1.11E-02 | NM_032843    | Hs.133205 | FIBCD1    |
| 3.01E-03 | 1.71E-04 | -1.21 | 4.87E-02 | NM_001099771 | Hs.580547 | A26C1B    |
| 4.75E-01 | 8.59E-03 | -1.21 | 4.05E-02 | NM_000227    | Hs.436367 | LAMA3     |
| 2.57E-02 | 6.40E-03 | -1.21 | 4.00E-02 | NM_007326    | Hs.700572 | CYB5R3    |
| 2.13E-01 | 4.65E-02 | 1.20  | 3.17E-04 | NM_032034    | Hs.105607 | SLC4A11   |
| 3.03E-01 | 1.62E-01 | 1.20  | 1.47E-05 | NM_005283    | Hs.248116 | XCR1      |
| 1.76E-02 | 2.10E-01 | -1.20 | 6.24E-03 | NM_000609    | Hs.522891 | CXCL12    |
| 2.99E-01 | 7.05E-03 | 1.20  | 7.53E-03 | NM_021214    | Hs.459072 | FAM108C1  |
| 1.62E-01 | 7.04E-01 | -1.20 | 2.19E-02 | NM_001012421 | Hs.632663 | ANKRD20A2 |
| 2.93E-02 | 1.03E-01 | 1.20  | 3.09E-02 | XR_016123    |           | LOC440063 |
| 1.17E-01 | 2.24E-02 | 1.20  | 1.56E-02 | NM_032575    | Hs.592087 | GLIS2     |
| 7.19E-01 | 7.25E-01 | -1.20 | 8.12E-03 | NM_003627    | Hs.591952 | SLC43A1   |
| 1.94E-01 | 3.80E-01 | -1.20 | 1.09E-02 | NM_144643    | Hs.654690 | SCLT1     |
| 6.33E-04 | 9.86E-01 | -1.20 | 1.95E-02 | NM_024665    | Hs.709397 | TBL1XR1   |
| 4.77E-01 | 1.09E-02 | -1.20 | 1.00E-02 | NM_004798    | Hs.369670 | KIF3B     |
| 3.96E-01 | 8.79E-02 | -1.20 | 4.99E-02 | NM_001080848 | Hs.522810 | CSAG2     |

|          |          |       |          |                 |           |          |
|----------|----------|-------|----------|-----------------|-----------|----------|
| 1.53E-01 | 3.86E-03 | -1.20 | 1.42E-02 | NM_006805       | Hs.96996  | HNRNPA0  |
| 4.17E-02 | 8.40E-03 | 1.20  | 1.95E-13 | NM_022740       | Hs.397465 | HIPK2    |
| 9.31E-03 | 9.14E-01 | -1.20 | 7.74E-03 | ENST00000361789 | Hs.631491 | CYTB     |
| 3.01E-02 | 2.95E-01 | -1.20 | 5.92E-03 | BX538288        | Hs.124047 | ZNF829   |
| 3.30E-02 | 3.41E-03 | 1.20  | 2.87E-02 | NM_017957       | Hs.670090 | EPN3     |
| 8.87E-01 | 1.30E-01 | -1.20 | 1.17E-03 | NM_004877       | Hs.5210   | GMFG     |
| 5.22E-01 | 2.04E-01 | -1.20 | 1.26E-02 | NM_005127       | Hs.85201  | CLEC2B   |
| 4.67E-01 | 7.52E-02 | 1.20  | 1.53E-02 | NM_001949       | Hs.269408 | E2F3     |
| 2.08E-01 | 4.09E-01 | 1.20  | 1.32E-02 | CR610954        | Hs.65135  | KIAA0913 |
| 3.08E-01 | 1.38E-02 | -1.20 | 5.83E-03 | NM_000722       | Hs.282151 | CACNA2D1 |
| 9.99E-01 | 4.64E-03 | -1.20 | 1.79E-02 | NM_000141       | Hs.533683 | FGFR2    |
| 5.91E-03 | 1.57E-03 | -1.20 | 7.14E-03 | CR616772        | Hs.448229 |          |
| 4.65E-02 | 6.49E-02 | -1.20 | 1.27E-02 | NM_177974       | Hs.512867 | CASC4    |
| 7.59E-01 | 1.46E-01 | -1.20 | 8.98E-03 |                 |           |          |
| 1.67E-02 | 3.80E-01 | -1.20 | 1.84E-03 | NM_153223       | Hs.483209 | CCDC100  |
| 7.13E-01 | 4.29E-03 | 1.20  | 1.05E-04 | NM_032107       | Hs.709356 | L3MBTL   |
| 1.45E-01 | 7.59E-02 | -1.20 | 4.93E-02 | BC063385        | Hs.74647  | TRA@     |
| 1.74E-02 | 4.90E-01 | -1.20 | 3.56E-02 | NM_012224       | Hs.481181 | NEK1     |
| 3.26E-02 | 1.07E-01 | 1.20  | 1.10E-03 | NM_001761       | Hs.1973   | CCNF     |
| 9.61E-01 | 7.85E-01 | 1.20  | 5.26E-04 | NM_000952       | Hs.709174 | PTAFR    |
| 8.08E-01 | 3.88E-01 | -1.20 | 2.75E-02 | NM_000364       | Hs.533613 | TNNT2    |
| 3.98E-03 | 2.41E-02 | 1.20  | 1.07E-05 | NM_207380       | Hs.32433  | C15orf52 |
| 5.77E-01 | 6.31E-01 | -1.20 | 4.04E-02 | THC2533546      |           |          |
| 1.11E-02 | 7.76E-03 | -1.20 | 4.90E-02 | BC002769        | Hs.517134 | C20orf43 |
| 5.66E-01 | 1.02E-01 | 1.20  | 1.03E-03 | BC024745        |           |          |
| 8.90E-01 | 4.05E-02 | 1.20  | 9.45E-04 | NM_000055       | Hs.420483 | BCHE     |
| 5.77E-02 | 3.21E-01 | 1.20  | 3.40E-04 | AK074633        |           | ELF5     |
| 3.47E-03 | 3.79E-01 | -1.20 | 3.13E-03 | NM_014782       | Hs.48924  | ARMCX2   |
| 1.94E-03 | 8.01E-01 | 1.20  | 3.20E-02 | NM_015455       | Hs.654984 | CNOT6    |
| 6.01E-01 | 2.95E-02 | 1.20  | 2.86E-03 | NM_023946       | Hs.158665 | LYNX1    |
| 7.42E-01 | 1.11E-02 | -1.20 | 5.69E-03 | NM_004064       | Hs.238990 | CDKN1B   |
| 9.84E-02 | 6.00E-02 | 1.20  | 2.57E-03 | NM_015085       | Hs.499659 | GARNL4   |
| 8.00E-01 | 1.70E-02 | -1.20 | 3.85E-02 | NM_025209       | Hs.167805 | EPC1     |
| 9.88E-02 | 2.23E-02 | 1.20  | 4.26E-02 | BC035156        | Hs.658127 |          |
| 3.83E-01 | 5.87E-01 | 1.20  | 9.92E-03 | BC005231        | Hs.472838 | STK4     |
| 7.64E-01 | 8.33E-01 | -1.20 | 1.92E-02 | NR_003716       | Hs.197076 | HOTAIR   |
| 2.08E-01 | 2.29E-01 | -1.20 | 1.25E-02 | NM_018951       | Hs.592166 | HOXA10   |
| 4.70E-02 | 2.01E-01 | -1.20 | 1.82E-14 | NM_017633       | Hs.10784  | FAM46A   |
| 4.84E-01 | 6.80E-02 | -1.20 | 4.73E-04 | NM_022117       | Hs.136164 | TSPYL2   |
| 2.40E-01 | 1.20E-01 | 1.20  | 1.61E-03 | NM_033449       | Hs.591257 | FCHSD1   |
| 9.42E-02 | 5.99E-01 | 1.20  | 4.54E-03 | BC032716        | Hs.698373 |          |
| 2.96E-03 | 2.79E-02 | -1.20 | 9.56E-03 | NR_002211       | Hs.532082 | MEIS3P1  |
| 8.93E-03 | 4.21E-01 | -1.20 | 2.57E-02 | NM_014803       | Hs.657337 | ZNF518A  |
| 2.52E-02 | 4.96E-02 | -1.20 | 1.98E-04 | NM_144982       | Hs.527874 | CCDC131  |
| 5.47E-01 | 3.16E-01 | 1.20  | 6.51E-03 | NM_021135       | Hs.655277 | RPS6KA2  |
| 9.93E-01 | 6.58E-01 | -1.20 | 2.23E-02 | NM_014951       | Hs.22653  | ZNF365   |
| 5.89E-01 | 6.80E-02 | 1.20  | 8.88E-03 | THC2635386      |           |          |

|          |          |      |          |              |           |         |
|----------|----------|------|----------|--------------|-----------|---------|
| 4.76E-03 | 2.81E-02 | 1.20 | 4.92E-02 | NM_152351    | Hs.462418 | SLC5A10 |
| 2.48E-01 | 5.80E-02 | 1.20 | 4.70E-04 | NM_172138    | Hs.567792 | IL28A   |
| 1.03E-02 | 1.12E-02 | 1.20 | 5.59E-03 | NM_001004431 | Hs.591142 | METRNL  |

| GeneName                    | Cytoband    |
|-----------------------------|-------------|
| chemokine (C-C motif)       | hs 17q12    |
| keratin 25                  | hs 17q21.2  |
| Sp8 transcription factor    | hs 7p15.3   |
| tyrosinase-related protein  | hs 9p23     |
| silver homolog (mouse)      | hs 12q13.2  |
| neurogenic differentiation  | hs 17q12    |
| silver homolog (mouse)      | hs 12q13.2  |
| anterior gradient homeobox  | hs 7p21.1   |
| X antigen family, member    | hs Xp11.22  |
| ribosomal protein S4        | hs 3p22.1   |
| coagulation factor C        | hs 14q12    |
| v-erb-a erythroblast        | hs 2q34     |
| chromosome 6 open reading   | hs 6p24.3   |
| keratin associated protein  | hs 17q21.2  |
| MACRO domain containing     | hs 20p12.1  |
| G protein-coupled receptor  | hs Xp22.2   |
|                             | hs 7q22.1   |
| hemoglobin, alpha 2         | hs 16p13.3  |
| ATPase, class I, type       | hs 19p13.3  |
|                             | hs 15q21.1  |
| hemoglobin, alpha 2         | hs 16p13.3  |
| tyrosinase (oculocutaneous) | hs 11q14.3  |
| keratin associated protein  | hs 21q22.11 |
| endothelin receptor         | hs 13q22.3  |
| chromosome 10 open reading  | hs 10q26.2  |
| transient receptor protein  | hs 15q13.3  |
|                             | hs 9q22.2   |
| coagulation factor C        | hs 14q12    |
| aldo-keto reductase         | hs 7q33     |
| armadillo repeat containing | hs 2q37.1   |
| small proline-rich protein  | hs 1q21.3   |
| hepatitis A virus cell      | hs 5q33.3   |
| aldo-keto reductase         | hs 7q33     |
| cadherin 12, type 2 (mouse) | hs 5p14.3   |
| tripartite motif-containing | hs 1p36.11  |
| guanosine monophosphate     | hs 6p22.3   |
| defensin, alpha 6, Paneth   | hs 8p23.1   |
| cerebellar degeneration     | hs 16p12.3  |
| neurotrimin                 | hs 11q25    |
| UDP glycosyltransferase     | hs 5p13.2   |
| hemoglobin, alpha 1         | hs 16p13.3  |
| tubulin, beta 2B            | hs 6p25.2   |
|                             | hs 14q22.3  |
| keratin associated protein  | hs 21q22.11 |
| UDP-N-acetyl-alpha-D-gluc   | hs 12q13.13 |
| CD1c molecule               | hs 1q23.1   |

|                        |             |
|------------------------|-------------|
|                        | hs 10q23.33 |
| spermatogenesis an     | hs 9q34.3   |
| solute carrier family  | hs 10q25.3  |
| solute carrier family  | hs 5p13.3   |
| chemokine (C-C mot     | hs 17q12    |
| cornulin               | hs 1q21.3   |
| keratin associated p   | hs 17q21.2  |
| keratin 74             | hs 12q13.13 |
| tetraspanin 8          | hs 12q21.1  |
| armadillo repeat cor   | hs 2q37.1   |
| paraneoplastic antig   | hs Xq28     |
| angiopoietin-like 5    | hs 11q22.1  |
| peptidyl arginine de   | hs 1p36.13  |
| extracellular leucine  | hs 22q13.1  |
|                        | hs 3p21.33  |
| small proline-rich pr  | hs 1q21.3   |
| ankyrin repeat doma    | hs 18q11.2  |
| hemoglobin, beta       | hs 11p15.4  |
| carboxypeptidase, v    | hs 7p15.1   |
| fibromodulin           | hs 1q32.1   |
| major histocompatit    | hs 6p21.32  |
|                        | hs 17q21.2  |
|                        | hs 20q13.33 |
| solute carrier family  | hs 14q32.12 |
| fatty acid binding pr  | hs 8q21.13  |
| similar to hCG18120    | hs 2q23.3   |
|                        | hs 6p21.32  |
|                        | hs 8q24.21  |
| hemoglobin, delta      | hs 11p15.4  |
| cellular retinoic acid | hs 15q25.1  |
| late cornified envelo  | hs 1q21.3   |
| centaurin, beta 5      | hs 1p36.33  |
|                        | hs 6p21.32  |
| major histocompatit    | hs 6p21.32  |
| CD86 molecule          | hs 3q13.33  |
|                        | hs 16p11.2  |
| small proline-rich pr  | hs 1q21.3   |
|                        | hs 19q13.33 |
| guanylate cyclase ac   | hs 1p34.2   |
| keratin 71             | hs 12q13.13 |
| KIAA0802               | hs 18p11.22 |
| aminolevulinate, del   | hs Xp11.21  |
| bestrophin 1           | hs 11q12.3  |
| chromosome 1 oper      | hs 1p32.3   |
| keratin 33B            | hs 17q21.2  |
|                        | hs 4q22.1   |
| defensin, alpha 6, Pa  | hs 8p23.1   |



|                                                                                           |             |
|-------------------------------------------------------------------------------------------|-------------|
| OTU domain, ubiquitin                                                                     | hs 14q32.13 |
| histidine ammonia-lyase                                                                   | hs 12q23.1  |
| gap junction protein                                                                      | hs Xq13.1   |
|                                                                                           | hs 9p24.2   |
| chromosome 12 open reading frame 1                                                        | hs 12q14.2  |
| tubulin, beta 3                                                                           | hs 16q24.3  |
|                                                                                           | hs 18p11.31 |
| MACRO domain containing protein 1                                                         | hs 20p12.1  |
| major histocompatibility complex class II, DR beta 3                                      | hs 6p21.32  |
| WAP four-disulfide core domain 1                                                          | hs 20q13.12 |
| hypothetical protein                                                                      | hs 5p15.1   |
| glycosyltransferase 1                                                                     | hs 12q24.32 |
| major histocompatibility complex class II, DR beta 3                                      | hs 6p21.32  |
| family with sequence homology to the major histocompatibility complex class II, DR beta 3 | hs 5q35.2   |
| major histocompatibility complex, class II, DR beta 3                                     |             |
| protein tyrosine phosphatase, SH-PTPase                                                   | hs 1q31.3   |
| class II, major histocompatibility complex, DR beta 3                                     | hs 16p13.13 |
| CD1a molecule                                                                             | hs 1q23.1   |
| glutamyl-peptidyl transferase 2                                                           | hs 2p22.2   |
| leptin receptor                                                                           | hs 1p31.3   |
| fibrinogen-like 2                                                                         | hs 7q11.23  |
| sperm flagellar 2                                                                         | hs 5p13.2   |
|                                                                                           | hs 1q23.2   |
| ATG9 autophagy related 1                                                                  | hs 7q36.1   |
| chemokine (C-X-C motif) subfamily 1                                                       | hs 4q13.3   |
| CD84 molecule                                                                             | hs 1q23.2   |
| major histocompatibility complex class II, DR beta 3                                      | hs 6p21.32  |
| H2.0-like homeobox 1                                                                      | hs 1q41     |
| ATP-binding cassette subfamily B member 1                                                 | hs 10q24.2  |
|                                                                                           | hs 17q25.1  |
| mannosyl (alpha-1,6) N-acetylglucosaminyltransferase 1                                    | hs 17q25.2  |
| ATP-binding cassette subfamily B member 1                                                 | hs 10q24.2  |
| synaptotagmin VI                                                                          | hs 1p13.2   |
| chromosome 18 open reading frame 1                                                        | hs 18p11.32 |
| Fc fragment of IgG, low affinity gamma 1 receptor                                         | hs 1q23.3   |
| family with sequence homology to the major histocompatibility complex class II, DR beta 3 | hs 5q35.3   |
| apolipoprotein B48 receptor                                                               | hs 16p11.2  |
| SLIT and NTRK-like family 1                                                               | hs Xq27.3   |
|                                                                                           | hs 17q25.1  |
| glutamyl-peptidyl transferase 2                                                           | hs 2p22.2   |
| major histocompatibility complex, class II, DR beta 4                                     |             |
| GTPase, IMAP family                                                                       | hs 7q36.1   |
| claudin 8                                                                                 | hs 21q22.11 |
|                                                                                           | hs 2q37.1   |
| fatty acid binding protein 1                                                              | hs 8q21.13  |
|                                                                                           | hs 8p12     |
|                                                                                           | hs 9p13.2   |

|                                 |             |
|---------------------------------|-------------|
| major histocompatib             | hs 6p21.32  |
| ATPase, class V, type           | hs 5q34     |
| nucleosome assemb               | hs Xq21.32  |
| lysosomal associated            | hs 1p35.2   |
| major histocompatib             | hs 6p21.32  |
| ecotropic viral integ           | hs 17q11.2  |
| galactosidase, beta 1           | hs 11q25    |
|                                 | hs 12q24.11 |
|                                 |             |
| KIAA1239                        | hs 4p14     |
| hypothetical protein            | hs 2q11.2   |
| CD36 molecule (thro             | hs 7q21.11  |
| CD1a molecule                   | hs 1q23.1   |
|                                 | hs 3p24.3   |
| CD36 molecule (thro             | hs 7q21.11  |
| family with sequenc             | hs 21q22.3  |
| leukocyte receptor t            | hs 15q15.1  |
|                                 | hs 9p24.3   |
| CD53 molecule                   | hs 1p13.3   |
| Fc fragment of IgE, h           | hs 1q23.2   |
| fatty acid binding pr           | hs 8q21.13  |
| major histocompatib             | hs 6p21.32  |
|                                 | hs 10q26.13 |
| major histocompatib             | hs 6p21.32  |
| regulator of G-prote            | hs 8q11.23  |
|                                 | hs 13q12.3  |
| keratin associated protein 4-11 |             |
| fatty acid binding pr           | hs 8q21.13  |
|                                 | hs 10p14    |
| keratin 77                      | hs 12q13.13 |
| chemokine (C-C mot              | hs 17q21.2  |
| similar to Akr1b10              | hs 10q21.3  |
| pleckstrin homology             | hs 2q24.1   |
|                                 | hs 4p15.31  |
| reticulocalbin 3, EF-h          | hs 19q13.33 |
| hypothetical LOC100             | hs 19p13.12 |
| hypothetical protein            | hs 1q21.3   |
| branched chain amin             | hs 12p12.1  |
| oocyte expressed pr             | hs 6q13     |
| myosin IB                       | hs 2q32.3   |
| amyloid beta (A4) pr            | hs 10p12.1  |
| microtubule associat            | hs 5q12.3   |
|                                 | hs 9q32     |
| serine/threonine kin            | hs 7p15.3   |
| clusterin                       | hs 8p21.1   |
| osteopetrosis associ            | hs 6q21     |
| solute carrier family           | hs 17p11.2  |

|                                                            |             |
|------------------------------------------------------------|-------------|
| thromboxane A synthase                                     | hs 7q34     |
| spermine oxidase                                           | hs 20p13    |
| four and a half LIM domain 1                               | hs Xq26.3   |
| major histocompatibility complex class II, invariant chain | hs 6p21.32  |
| transketolase-like 1                                       | hs Xq28     |
| D4, zinc and double zinc finger domain containing 1        | hs 14q24.2  |
|                                                            | hs 1q21.1   |
| CD207 molecule, large                                      | hs 2p13.3   |
|                                                            | hs Xp22.31  |
| CD74 molecule, major                                       | hs 5q33.1   |
| Ras association (Rap) domain containing 1                  | hs 20p13    |
| proteoglycan 4                                             | hs 1q31.1   |
| 3'-phosphoadenosine phosphatase                            | hs 10q23.2  |
| sterol O-acyltransferase 1                                 | hs 1q25.2   |
|                                                            | hs 16p12.1  |
| internexin neuronal                                        | hs 10q24.33 |
|                                                            | hs 1p36.22  |
|                                                            | hs 16q12.2  |
| UDP-N-acetylglucosaminase 6                                | hs 9q34.3   |
| neuropilin (NRP) and semaphorin 4B domain containing 1     | hs 16q12.1  |
| similar to mCG2980                                         | hs 19q13.2  |
| N-acetyltransferase 1                                      | hs 4p16.3   |
| myosin IG                                                  | hs 7p13     |
| ADAM metalloproteinase 1                                   | hs 2q33.3   |
| hypothetical protein                                       | hs Xq26.3   |
| similar to hCG20403                                        | hs 1q23.2   |
| hemopoietic cell kinase                                    | hs 20q11.21 |
| prostaglandin D2 synthase                                  | hs 4q22.3   |
| stearoyl-CoA desaturase 1                                  | hs 10q24.31 |
| interleukin 15                                             | hs 4q31.21  |
| major histocompatibility complex class II, invariant chain | hs 6p21.32  |
| CD52 molecule                                              | hs 1p36.11  |
| DENN/MADD domain containing 1                              | hs 1p13.3   |
| protease, serine, 1 (trypsin)                              | hs 7q34     |
| solute carrier family 22, member 3                         | hs 2q36.3   |
| major histocompatibility complex class II, invariant chain | hs 6p21.32  |
|                                                            | hs 4q22.3   |
| phosphoinositide-3-kinase, class II, delta                 | hs 5q13.1   |
| centrosomal protein 1                                      | hs 5p15.33  |
| gremlin 2, cysteine knot                                   | hs 1q43     |
| paraneoplastic antigen A2                                  | hs Xq28     |
| ectonucleoside triphosphate diphosphate phosphohydrolase 1 | hs 10q23.33 |
| forkhead box D1                                            | hs 5q13.2   |
| potassium channel tetramer domain containing 1             | hs 13q22.3  |
| major histocompatibility complex class II, invariant chain | hs 6p21.32  |
| hypothetical LOC392432                                     | hs 9p11.2   |
| major histocompatibility complex class II, invariant chain | hs 6p21.32  |

|                                 |             |
|---------------------------------|-------------|
| chondroadherin                  | hs 17q21.33 |
| colony stimulating factor       | hs 5q33.1   |
| cysteine-rich protein           | hs 14q32.33 |
| paired box 3                    | hs 2q36.1   |
| Fraser syndrome 1               | hs 4q21.21  |
| RAB32, member RAS               | hs 6q24.3   |
| keratin 77                      | hs 12q13.13 |
| ribonuclease, RNase             | hs 14q11.2  |
| GLI pathogenesis-related        | hs 12q21.2  |
| family with sequence            | hs 3q22.3   |
|                                 | hs 13q14.12 |
|                                 | hs 20q13.12 |
| TYRO protein tyrosinase         | hs 19q13.12 |
| major histocompatibility        | hs 6p21.32  |
| macrophage expressed            | hs 11q12.1  |
| ubiquitin specific peptidase    | hs 17p13.2  |
| sphingomyelin phosphatase       | hs 1p35.3   |
| Purkinje cell protein           | hs 1q23.3   |
| hemoglobin, gamma               | hs 11p15.4  |
| glycogenin 2                    | hs Xp22.33  |
| protein kinase, cAMP            | hs 7q22.3   |
| F-box and leucine-rich          | hs 3p22.3   |
|                                 | hs 5q31.1   |
| cartilage intermediate          | hs 15q22.31 |
| transmembrane protein           | hs 11p15.1  |
| replication protein A           | hs Xq21.33  |
| family with sequence            | hs 5q35.2   |
| microfibrillar-associated       | hs 17p11.2  |
| protein tyrosine phosphatase    | hs 10p12.33 |
| laeverin                        | hs 5q23.1   |
| protease, serine, 21            | hs 16p13.3  |
|                                 | hs 5q35.1   |
| Fc fragment of IgG binding      | hs 19q13.2  |
| microtubule-associated          | hs 5q13.2   |
| family with sequence            | hs 7q35     |
|                                 | hs 9q12     |
| complexin 3                     | hs 15q24.1  |
| RAB3B, member RAS               | hs 1p32.3   |
| PIF1 5'-to-3' DNA helicase      | hs 15q22.31 |
| Hermansky-Pudlak syndrome       | hs 10q24.2  |
| activating transcription factor | hs 1q32.3   |
|                                 | hs 4q21.21  |
|                                 | hs 4q21.23  |
| chromosome 3 open reading       | hs 3p21.31  |
|                                 |             |
| annexin A9                      | hs 1q21.2   |
|                                 | hs 2q31.1   |

|                                                              |             |
|--------------------------------------------------------------|-------------|
| tumor necrosis factor                                        | hs 1q21.2   |
|                                                              | hs 15q15.3  |
| myosin IG                                                    | hs 7p13     |
| uropod 1A                                                    | hs 19q13.12 |
|                                                              | hs 20p12.1  |
| major histocompatibility complex class II                    | hs 6p21.32  |
|                                                              | hs 10q11.22 |
| signal peptide, CUB domain                                   | hs 11p15.4  |
| immunoglobulin superfamily                                   | hs 16p12.2  |
|                                                              |             |
| regulator of G-protein signaling                             | hs 16p13.3  |
| family with sequence homology to G-protein-coupled receptors | hs 5q35.3   |
|                                                              | hs 5q33.1   |
| phosphoinositide-3-kinase                                    | hs 22q12.2  |
| ras homolog gene family member 1                             | hs 2p24.1   |
| lysosomal associated glycoprotein                            | hs 1p35.2   |
| hypothetical protein                                         | hs 2q22.3   |
| zinc finger E-box binding domain 1                           | hs 10p11.22 |
| PRO1933                                                      | hs 10q24.31 |
| dedicator of cytokinesis 1                                   | hs Xq24     |
| CD8b molecule                                                | hs 2p11.2   |
| amyloid beta (A4) precursor protein                          | hs 10p12.1  |
| sialic acid binding lectin 1                                 | hs 19q13.33 |
| glycerol kinase                                              | hs Xp21.2   |
|                                                              | hs 1p22.1   |
| melanocortin 1 receptor                                      | hs 16q24.3  |
| fibulin 5                                                    | hs 14q32.12 |
| scavenger receptor class B member 1                          | hs 8p21.1   |
| potassium voltage-gated channel subfamily H member 1         | hs 1p36.31  |
| ST6 (alpha-N-acetylglucosaminidase 6)                        | hs 1p31.1   |
| phosphodiesterase 4B                                         | hs 19p13.2  |
| R-spondin homolog 1                                          | hs 1p34.3   |
| integrin, beta-like 1                                        | hs 13q33.1  |
|                                                              | hs 8p21.1   |
|                                                              | hs 1q22     |
| transmembrane 4 L domain                                     | hs 3q29     |
| transmembrane protein                                        | hs 11q24.3  |
|                                                              | hs 14q21.3  |
|                                                              | hs 18q11.2  |
| bA299N6.3                                                    | hs 20q13.33 |
| NADH dehydrogenase, subunit 3 (complex I)                    |             |
| molybdenum cofactor                                          | hs 18q12.2  |
| platelet-derived growth factor receptor alpha                | hs 8p22     |
| SLAM family member 1                                         | hs 1q23.2   |
| PFTAIRE protein kinase                                       | hs 7q21.13  |
|                                                              | hs 7q31.2   |
| tumor necrosis factor                                        | hs 14q32.32 |

|                                                        |             |
|--------------------------------------------------------|-------------|
| synaptopodin 2                                         | hs 4q26     |
| sortilin-related VPS1                                  | hs 4p16.1   |
| RAS, dexamethason                                      | hs 17p11.2  |
|                                                        | hs 1p33     |
| chromosome 8 oper                                      | hs 8q24.3   |
| macrophage express                                     | hs 11q12.1  |
| repetin                                                | hs 1q21.3   |
| melanocortin 1 rece                                    | hs 16q24.3  |
| phosphodiesterase 4                                    | hs 1q21.1   |
| receptor tyrosine kin                                  | hs 9q22.31  |
| NDRG family membe                                      | hs 16q21    |
| major histocompatibility complex, class II, DQ alpha 1 |             |
|                                                        | hs 21q22.3  |
| adenomatosis polyp                                     | hs 19p13.3  |
| formin-like 1                                          | hs 17q21.31 |
|                                                        | hs 7q22.3   |
| major facilitator sup                                  | hs 1q32.1   |
|                                                        | hs 2p22.1   |
| FERM and PDZ doma                                      | hs 9p13.2   |
|                                                        | hs 5q15     |
| WD repeat domain,                                      | hs 17q24.2  |
| CD70 molecule                                          | hs 19p13.3  |
| SP140 nuclear body                                     | hs 2q37.1   |
| KIAA1324-like                                          | hs 7q21.12  |
|                                                        | hs 12q13.13 |
| solute carrier family                                  | hs 17p13.1  |
| hypothetical gene su                                   | hs 16p13.3  |
| zinc finger and SCAN                                   | hs 19q13.43 |
|                                                        | hs 1p32.3   |
|                                                        | hs 9p11.2   |
| snail homolog 1 (Dro                                   | hs 20q13.13 |
| aryl-hydrocarbon re                                    | hs 15q25.1  |
| sarcolipin                                             | hs 11q22.3  |
| 2',5'-oligoadenylate                                   | hs 12q24.13 |
| ecotropic viral integ                                  | hs 17q11.2  |
|                                                        | hs 20q11.21 |
| myelin protein zero-                                   | hs 11q23.3  |
| odd-skipped related                                    | hs 8q22.2   |
| glial cell derived neu                                 | hs 5p13.2   |
| lymphocyte cytosolic                                   | hs 13q14.12 |
| regulator of calcineu                                  | hs 6p12.3   |
| pleckstrin                                             | hs 2p14     |
| spleen focus forming                                   | hs 11p11.2  |
| zinc finger protein 1                                  | hs Xp11.3   |
| tumor necrosis facto                                   | hs 6q23.3   |
| protein kinase C, bet                                  | hs 16p12.1  |
|                                                        | hs 11q23.2  |

|                                                         |             |
|---------------------------------------------------------|-------------|
| chromosome 7 open reading frame 1                       | hs 7p15.1   |
| SRY (sex determining region Y)                          | hs 8p23.1   |
| mitogen-activated protein kinase 1                      | hs 17q24.3  |
| sortilin 1                                              | hs 1p13.3   |
| cytochrome b                                            |             |
| cornichon homolog 1                                     | hs 11q13.1  |
| very low density lipoprotein receptor class B member 1  | hs 9p24.2   |
| phosphodiesterase 3B                                    | hs 11p15.2  |
| major histocompatibility complex class II DQ beta chain | hs 6p21.32  |
| T-box 15                                                | hs 1p12     |
| cysteinyl leukotriene synthase                          | hs Xq21.1   |
| keratin 28                                              | hs 17q21.2  |
| phosphorylase, glycogen                                 | hs 11q13.1  |
| contactin 2 (axonal)                                    | hs 1q32.1   |
| ATG9 autophagy related 1                                | hs 7q36.1   |
| natriuretic peptide receptor 1                          | hs 5p13.3   |
| cysteine-rich, angiogenic inducer 6B                    | hs 1p22.3   |
| forkhead box J1                                         | hs 17q25.1  |
| colony stimulating factor 1                             | hs Yp11.32  |
| guanine nucleotide binding protein (G-protein) alpha 13 | hs 9q21.2   |
| small proline-rich protein 1                            | hs 1q21.3   |
|                                                         | hs 11q24.3  |
|                                                         | hs 12p11.21 |
| patatin-like phospholipase domain containing 1          | hs 22q13.31 |
| natriuretic peptide receptor 1                          | hs 5p13.3   |
| interleukin 1 family, member 1                          | hs 2q13     |
|                                                         | hs 22q13.33 |
| zinc finger protein 2                                   | hs 19p12    |
| SRY (sex determining region Y)                          | hs 8p23.1   |
| sarcosine dehydrogenase                                 | hs 9q34.2   |
|                                                         |             |
| plexin domain containing 1                              | hs 17q12    |
| FRAS1 related extracellular domain containing 1         | hs 9p22.3   |
| hypothetical protein                                    | hs 22q13.33 |
| slingshot homolog 1                                     | hs 12q24.11 |
| hypothetical protein                                    | hs 16p12.3  |
|                                                         | hs 5p13.1   |
| LIM and calponin homology domain containing 1           | hs 4p13     |
| 6-phosphofructo-2-kinase                                | hs 1q32.2   |
| sperm flagellar 2                                       | hs 5p13.2   |
| solute carrier family 12 member 1                       | hs 14q11.2  |
| grainyhead-like 3 (Drosophila)                          | hs 1p36.11  |
| metallothionein-like domain containing 1                | hs 11q13.2  |
| copine family member 1                                  | hs 3p25.3   |
| zinc finger protein 3                                   | hs 6p22.1   |
| cysteine-rich, angiogenic inducer 6B                    | hs 1p22.3   |
| SRY (sex determining region Y)                          | hs 12p12.1  |

|                                                             |             |
|-------------------------------------------------------------|-------------|
| chromosome 15 open reading frame 1                          | hs 15q21.1  |
| chloride channel 5 (retinal)                                | hs Xp11.22  |
| solute carrier family 12, member 1                          | hs 13q32.3  |
| hypothetical locus CLY                                      | hs 16q24.3  |
| protocadherin beta 4                                        | hs 5q31.3   |
| low density lipoprotein receptor                            | hs 1p32.3   |
| coiled-coil domain containing 1                             | hs 11q21    |
| transmembrane protein 17                                    | hs 17q23.1  |
| gap junction protein gamma 1                                | hs Xq13.1   |
| family with sequence similarity 100, member 1               | hs 7q32.1   |
| empty spiracles homolog 1                                   | hs 10q26.11 |
| similar to hCG20367                                         | hs 6q23.3   |
|                                                             | hs 15q24.2  |
| solute carrier organic anion transporter family 1, member 1 | hs 20q13.33 |
| PFTAIRE protein kinase 1                                    | hs 7q21.13  |
|                                                             | hs 1q44     |
| bradykinin receptor 1                                       | hs 14q32.2  |
|                                                             | hs 7q22.1   |
| zinc finger protein 708                                     | hs 19q13.43 |
|                                                             | hs 14q22.3  |
|                                                             | hs 3q29     |
| transglutaminase 1 (blood)                                  | hs 14q12    |
| chromosome 4 open reading frame 1                           | hs 4p14     |
|                                                             | hs 5q31.1   |
| Src-like-adaptor protein 1                                  | hs 8q24.22  |
| interleukin 2 receptor gamma                                | hs 22q12.3  |
| ceroid-lipofuscinosis 1                                     | hs 8p23.3   |
| alanyl (membrane) aminopeptidase 1                          | hs 15q26.1  |
| glycosylphosphatidylinositol transfer protein               | hs 6p22.2   |
| heparanase                                                  | hs 4q21.23  |
| solute carrier family 12, member 2                          | hs 2p23.3   |
|                                                             | hs 5q15     |
| S100 calcium binding protein gamma                          | hs 1q21.3   |
| coagulation factor XI                                       | hs 6p25.1   |
| cyclin D1                                                   | hs 11q13.2  |
| GTPase, IMAP family 1                                       | hs 7q36.1   |
| protein kinase C, beta 1                                    | hs 16p12.1  |
| receptor (G protein-coupled)                                | hs 2q37.3   |
| outer dense fiber of microtubule                            | hs 15q24.2  |
|                                                             | hs Xp21.3   |
|                                                             | hs 21q22.3  |
| vav 1 guanine nucleotide exchange factor                    | hs 19p13.3  |
| protocadherin gamma 1                                       | hs 5q31.3   |
| RAB32, member RAB3                                          | hs 6q24.3   |
| ATPase family, AAA domain containing 1                      | hs 17q21.32 |
| spermatogenesis associated protein 1                        | hs 15q21.1  |
|                                                             | hs 5q35.2   |



|                        |             |
|------------------------|-------------|
|                        | hs 9q22.31  |
| ATP-binding cassette   | hs 21q22.3  |
|                        | hs 4p13     |
| protease, serine, 2 (f | hs 7q34     |
|                        | hs 11q12.3  |
| scavenger receptor c   | hs 12q24.31 |
| neurofascin homolog    | hs 1q32.1   |
| chemokine (C-X3-C r    | hs 3p22.2   |
| cytochrome P450, fa    | hs 19p13.12 |
| stearoyl-CoA desatu    | hs 4q21.22  |
| chromosome 9 oper      | hs 9p24.2   |
| DnaJ (Hsp40) homol     | hs 1p31.1   |
|                        | hs 3p21.33  |
| cathepsin S            | hs 1q21.2   |
| fatty acid desaturase  | hs 11q12.2  |
| coiled-coil domain c   | hs 11q24.2  |
|                        | hs 6p24.3   |
|                        | hs 3q26.2   |
| tripartite motif-cont  | hs 6p21.33  |
| CD24 molecule          | hs Yq11.222 |
| keratin associated p   | hs 11q13.4  |
| tumor necrosis fact    | hs 8p21.3   |
| TIMP metallopeptid     | hs 22q12.3  |
| Cdon homolog (mou      | hs 11q24.2  |
| EF-hand domain fam     | hs 8p22     |
| glycoprotein VI (plat  | hs 19q13.42 |
| kinesin family memb    | hs 2q23.1   |
| family with sequenc    | hs 15q22.2  |
|                        |             |
|                        | hs 4p15.32  |
| DnaJ (Hsp40) homol     | hs 1p31.1   |
| activated leukocyte    | hs 3q13.11  |
| mirror-image polyda    | hs 14q21.1  |
| OTU domain, ubiqui     | hs 14q32.13 |
|                        | hs 4q21.1   |
| chemokine (C-C mot     | hs 17q12    |
| tetraspanin 2          | hs 1p13.2   |
| osteopetrosis associ   | hs 6q21     |
|                        | hs 19p13.11 |
| G protein regulated    | hs 5q35.2   |
| heat shock 70kDa pr    | hs 10q25.3  |
| ARV1 homolog (S. ce    | hs 1q42.2   |
| TSC22 domain family    | hs 13q14.11 |
| leucine rich repeat a  | hs 8q21.2   |
| chloride intracellular | hs Xq28     |
|                        | hs 16p12.3  |
| aryl hydrocarbon rec   | hs 12p11.23 |

|                       |             |
|-----------------------|-------------|
|                       | hs 7q36.3   |
|                       | hs 2q33.3   |
| cysteine-rich, angiog | hs 1p22.3   |
| serpin peptidase inh  | hs 17p13.3  |
| solute carrier family | hs 2p22.1   |
| tensin like C1 domai  | hs 12q13.13 |
| hypothetical LOC100   | hs 7p22.1   |
|                       | hs 10p13    |
|                       | hs 12q24.22 |
| Ras association (RalG | hs 4q13.3   |
| extracellular matrix  | hs 1q21.2   |
| family with sequenc   | hs 7q32.1   |
|                       | hs 3p14.2   |
| ankyrin repeat doma   | hs 10q24.1  |
|                       | hs 11q13.4  |
| low density lipoprot  | hs 1p32.3   |
| arachidonate 5-lipox  | hs 13q12.3  |
| Ras association (RalG | hs 10q11.21 |
|                       | hs 19q13.31 |
| transmembrane pro     | hs 11p15.1  |
| actin-related Arp11   | hs 7q36.1   |
| protein kinase (cAM   | hs 6q22.31  |
| suppressor of cytoki  | hs 18q22.2  |
| periostin, osteoblast | hs 13q13.3  |
|                       | hs 14q22.3  |
|                       |             |
| bactericidal/permea   | hs 22q12.3  |
|                       | hs 4p15.33  |
| tescalcin             | hs 12q24.22 |
|                       |             |
|                       | hs 10q26.13 |
|                       | hs 17p13.2  |
| formyl peptide recep  | hs 19q13.33 |
| keratin associated p  | hs 21q22.11 |
| zinc finger protein 1 | hs 19p13.2  |
| sodium channel, vol   | hs 11q23.3  |
|                       | hs 3q27.1   |
| heat shock 70kDa pr   | hs 6p21.33  |
|                       | hs 6p21.31  |
| kallikrein-related pe | hs 19q13.33 |
| leucine rich repeat c | hs 17q21.32 |
| family with sequenc   | hs 22q13.2  |
|                       | hs 22q13.33 |
|                       | hs 16p11.2  |
| phospholipase A2, g   | hs 1p36.13  |
| hypothetical protein  | hs 5q33.1   |
| lipoma HMGIC fusio    | hs 3p25.3   |

|                        |             |
|------------------------|-------------|
| phospholipase C, de    | hs 2q35     |
| transmembrane 4 L      | hs 17p13.2  |
| F-box protein 10       | hs 9p13.2   |
|                        | hs 2p23.3   |
| solute carrier family  | hs 21q22.11 |
| zinc finger protein 6  | hs 1p22.2   |
|                        | hs 2p11.2   |
| Bruton agammaglob      | hs Xq22.1   |
|                        | hs 6p22.3   |
|                        |             |
| hypothetical gene su   | hs 2q36.1   |
| ubiquitin specific pe  | hs 11q23.3  |
| arylsulfatase family,  | hs 5q33.1   |
| nuclear receptor sub   | hs 12q13.13 |
| hypothetical LOC643    | hs 4q21.1   |
| MORN repeat conta      | hs 1p36.33  |
|                        | hs 4p15.33  |
| chondroitin sulfate p  | hs 15q24.2  |
|                        | hs 19p13.3  |
|                        | hs 18q11.2  |
| signal transducer an   | hs 2q32.3   |
| chromosome 1 oper      | hs 1q31.3   |
| glutaredoxin 3         | hs 10q26.3  |
| sema domain, immu      | hs 10q24.31 |
| chloride channel, ca   | hs 1p22.3   |
| potassium large con    | hs 12q15    |
| melanoregulin          | hs 2q35     |
| contactin 3 (plasma    | hs 3p12.3   |
|                        | hs 6p12.1   |
| GLI pathogenesis-rel   | hs 12q21.1  |
|                        | hs 10q22.2  |
|                        | hs 10q24.32 |
|                        | hs 18q23    |
| RasGEF domain fam      | hs 5q35.3   |
| gap junction protein   | hs 7q22.1   |
| myosin, heavy chain    | hs 16p13.11 |
|                        | hs 9q34.11  |
| myosin VA (heavy ch    | hs 15q21.2  |
| protein kinase, Y-link | hs Yp11.2   |
| phosphoglucomutas      | hs 9q13     |
| calcium binding prot   | hs 13q14.2  |
| homeodomain inter      | hs 7q34     |
|                        | hs 6q15     |
| receptor (chemosen     | hs 3q27.3   |
|                        | hs 14q11.2  |
| CD40 molecule, TNF     | hs 20q13.12 |
|                        | hs 19p12    |

|                                                |             |
|------------------------------------------------|-------------|
|                                                | hs 1q25.2   |
| sterile alpha motif domain                     | hs 7q21.2   |
| homeodomain interdigitating                    | hs 7q34     |
| caspase recruitment domain                     | hs 17q25.3  |
| Cdon homolog (mouse)                           | hs 11q24.2  |
| slit homolog 3 (Drosophila)                    | hs 5q35.1   |
|                                                | hs 2q37.2   |
| chromosome 9 open reading frame                | hs 9q21.11  |
| gap junction protein gamma 2                   | hs 13q12.11 |
| Sec61 alpha 2 subunit                          | hs 10p14    |
| bradykinin receptor type 2                     | hs 14q32.2  |
|                                                | hs 11q21    |
|                                                |             |
| leukocyte immunoglobulin-like receptor 1       | hs 19q13.42 |
| keratin 9 (epidermal)                          | hs 17q21.2  |
| heme oxygenase (delta)                         | hs 22q12.3  |
| S100 calcium binding protein beta              | hs 1q21.3   |
| hypothetical protein                           | hs 16p12.3  |
| creatine kinase, mitochondrial                 | hs 15q15.3  |
|                                                | hs 2q23.3   |
| sterol-C4-methyl oxidase                       | hs 4q32.3   |
|                                                | hs 6q22.31  |
| hepatitis A virus cell surface receptor        | hs 5q33.3   |
| carcinoembryonic antigen                       | hs 19q13.2  |
| Friend leukemia virus protein                  | hs 11q24.3  |
| lymphocyte antigen 96                          | hs 6p25.1   |
| Boc homolog (mouse)                            | hs 3q13.2   |
| RAP1 interacting factor                        | hs 2q23.3   |
| contactin 2 (axonal)                           | hs 1q32.1   |
| mal, T-cell differentiation                    | hs 2q11.1   |
| glucosaminyl (N-acetyl) transferase            | hs 15q22.2  |
| kelch repeat and BTB domain containing protein | hs 11q22.3  |
|                                                | hs 20q13.12 |
| keratin associated protein 1                   | hs 17q21.2  |
| vav 3 guanine nucleotide exchange factor       | hs 1p13.3   |
| phosphoserine phosphatase                      | hs 7p11.2   |
| sarcospan (Kras oncogene)                      | hs 12p12.1  |
| Kruppel-like factor 2                          | hs 19p13.11 |
|                                                | hs 12q23.3  |
| hypothetical protein                           | hs 22q13.33 |
| bone morphogenetic protein 1                   | hs 20q13.31 |
|                                                | hs 17q21.31 |
| PIP5K1A pseudogene                             | hs 6p24.3   |
| transcription factor 1                         | hs 10q25.3  |
| ubiquitin specific peptidase 4                 | hs 10q22.2  |
| insulin-like growth factor 1                   | hs 12q13.13 |
| serpin peptidase inhibitor 1                   | hs 11q12.1  |

|                        |             |
|------------------------|-------------|
| centrosomal protein    | hs 2p14     |
| glycerol kinase        | hs Xp21.2   |
| activating transcript  | hs 12p13.1  |
| family with sequenc    | hs 2q21.1   |
|                        | hs 7q34     |
| chitinase 3-like 1 (ca | hs 1q32.1   |
| neurobeachin           | hs 13q13.3  |
|                        | hs 8q24.21  |
|                        | hs Xq23     |
| placental growth fac   | hs 14q24.3  |
|                        | hs 10p15.1  |
|                        | hs 9p11.2   |
| oligodendrocyte tra    | hs 6q23.3   |
| family with sequenc    | hs 13q12.13 |
| docking protein 6      | hs 18q22.2  |
| importin 7             | hs 11p15.4  |
| CAP-GLY domain cor     | hs 2p23.2   |
| TBC1 domain family,    | hs 17q25.3  |
| polymerase (DNA di     | hs 8p11.21  |
| retinoic acid early tr | hs 6q25.1   |
|                        | hs 22q13.31 |
| KIAA1211 protein       | hs 4q12     |
| intersectin 1 (SH3 do  | hs 21q22.11 |
| nebulin-related anch   | hs 10q25.3  |
| B-cell linker          | hs 10q23.33 |
| BAI1-associated prot   | hs 22q13.1  |
| mitochondrial ribosq   | hs 15q25.3  |
| leukotriene C4 synth   | hs 5q35.3   |
|                        | hs 4q34.1   |
|                        | hs 22q11.23 |
| RAB3B, member RAS      | hs 1p32.3   |
|                        | hs Xq22.3   |
| chromosome 10 ope      | hs 10q21.3  |
| dynein, axonemal, h    | hs 17p13.1  |
|                        | hs 22q12.3  |
| chromosome 12 ope      | hs 12p13.32 |
| BARX homeobox 2        | hs 11q24.3  |
| nuclear factor I/B     | hs 9p23     |
| cytochrome P450, fa    | hs 12q14.1  |
|                        | hs 6p22.1   |
| olfactory receptor, f  | hs 3q11.2   |
| TAF9B RNA polymer      | hs Xq21.1   |
|                        |             |
| Kruppel-like factor 1  | hs 13q22.1  |
| hypothetical protein   | hs 11q23.2  |
|                        | hs 11q13.1  |
| nuclear receptor sub   | hs 4q31.23  |

|                                |             |
|--------------------------------|-------------|
| ovostatin 2                    | hs 12p11.21 |
| hypothetical protein           | hs 5q33.1   |
|                                | hs 20q13.2  |
| allograft inflammatory         | hs 6p21.33  |
| mitogen-activated protein      | hs 22q13.33 |
| zinc finger protein 4          | hs 19p12    |
| spectrin repeat cont           | hs 14q23.2  |
| olfactory receptor, family     | hs 6p22.1   |
| arachidonate 5-lipoxygenase    | hs 13q12.3  |
| protein tyrosine phosphatase   | hs 19q13.42 |
| zinc finger protein 1          | hs 19q13.43 |
| CD33 molecule                  | hs 19q13.33 |
| solute carrier family          | hs 13q14.11 |
|                                |             |
| glutathione S-transferase      | hs 1p13.3   |
| carnitine palmitoyltransferase | hs 11q13.2  |
| NUAK family, SNF1-like         | hs 12q23.3  |
| ELOVL family member            | hs 5q12.1   |
| pleckstrin homology            | hs 1q32.1   |
| von Willebrand factor          | hs 7p12.2   |
| kallikrein-related peptidase   | hs 19q13.33 |
| CD8a molecule                  | hs 2p11.2   |
| synapse defective 1, homolog   | hs 1p22.3   |
| remodeling and spacing         | hs 11q14.1  |
|                                | hs 3p25.1   |
| ADAM metalloproteinase         | hs 21q21.3  |
| family with sequence           | hs 17q21.33 |
| family with sequence           | hs 15q25.1  |
| capping protein (actin)        | hs 12p12.3  |
| solute carrier family          | hs 9q34.11  |
| purinergic receptor            | hs 3q25.1   |
| microtubule-associated         | hs 5q13.2   |
|                                | hs 3q29     |
| sorting nexin 10               | hs 7p15.2   |
| formin 1                       | hs 15q13.3  |
| myomesin (M-protein)           | hs 8p23.3   |
|                                | hs 2q21.2   |
| butyrophilin, subfamily        | hs 6p22.1   |
| SERTA domain containing        | hs 1q32.2   |
| phospholipase A2 related       | hs 2q24.2   |
| LIM domain containing          | hs 17q23.3  |
| transmembrane protein          | hs 6q23.1   |
| dual oxidase 1                 | hs 15q21.1  |
| calmodulin-like 5              | hs 10p15.1  |
| tumor necrosis factor          | hs 18q21.33 |
|                                | hs 3q27.1   |
| hypothetical protein           | hs 1q42.13  |

|                        |             |
|------------------------|-------------|
| nucleotide-binding d   | hs 16q12.1  |
| homeobox C10           | hs 12q13.13 |
| interleukin 6 signal t | hs 5q11.2   |
|                        | hs 2q23.3   |
| protease, serine 27    | hs 16p13.3  |
|                        | hs 1q42.3   |
| helicase (DNA) B       | hs 12q14.3  |
| tumor necrosis facto   | hs 8p21.3   |
| Williams Beuren syn    | hs 7q11.23  |
|                        | hs Xq13.1   |
| SRY (sex determinin    | hs 12p12.1  |
|                        | hs 5q35.2   |
| carnitine palmitoyltr  | hs 11q13.2  |
|                        | hs Xq21.33  |
|                        | hs 2q14.3   |
|                        | hs 8q21.3   |
| ephrin-A5              | hs 5q21.3   |
| carboxypeptidase A4    | hs 7q32.2   |
| NHL repeat containi    | hs 13q13.3  |
| peroxisome prolifer    | hs 6p21.31  |
|                        | hs 22q13.1  |
| ras homolog gene fa    | hs 1q42.13  |
| hypothetical protein   | hs 2q37.3   |
| SHC (Src homology 2    | hs 9q22.1   |
| plasminogen activat    | hs 10q22.2  |
| regulator of G-prote   | hs 1q31.2   |
| wingless-type MMTV     | hs 7q31.31  |
| FH2 domain contain     | hs 4q31.3   |
| transforming growth    | hs 2p13.3   |
| potassium channel t    | hs 22q12.3  |
| glioma tumor suppre    | hs 19q13.32 |
| SH2 domain contain     | hs 1p36.12  |
| integrin, beta 8       | hs 7p15.3   |
|                        | hs 14q23.1  |
|                        | hs 11p15.4  |
|                        | hs 22q12.3  |
| transforming, acidic   | hs 8p11.23  |
|                        | hs 16q24.3  |
| SRY (sex determinin    | hs 3q26.33  |
| eukaryotic translati   | hs 10q22.2  |
|                        | hs 4p14     |
| zinc finger and BTB d  | hs 12q13.3  |
| myosin regulatory lig  | hs 6p22.3   |
| LOC440173              | hs 9q21.33  |
| exportin, tRNA (nucl   | hs 12q14.2  |
| C-type lectin domain   | hs 3p21.31  |
| dyslexia susceptibilit | hs 15q21.3  |

|                                           |             |
|-------------------------------------------|-------------|
| FK506 binding prote                       | hs 6p21.31  |
| casein kinase 2, alph                     | hs 16q21    |
| KDEL (Lys-Asp-Glu-Le                      | hs 11q22.3  |
| zinc finger protein 6                     | hs 1p22.2   |
| NADH dehydrogenase, subunit 3 (complex I) |             |
| tissue factor pathwa                      | hs 2q32.1   |
| Ras association (RalG                     | hs 10q11.21 |
|                                           | hs 2q21.2   |
| lymphocyte transme                        | hs 1q32.1   |
| choroideremia (Rab                        | hs Xq21.2   |
| par-3 partitioning de                     | hs 2q33.3   |
|                                           | hs Xq24     |
| protein tyrosine pho                      | hs 10q26.2  |
| par-3 partitioning de                     | hs 10p11.22 |
| kazrin                                    | hs 1p36.21  |
| solute carrier family                     | hs 17q21.31 |
| melanoma associate                        | hs 19p13.3  |
| solute carrier family                     | hs 6p12.3   |
| small G protein sign                      | hs 22q11.23 |
| tweety homolog 1 (D                       | hs 19q13.42 |
| activin A receptor, ty                    | hs 3p22.2   |
| pleckstrin homology                       | hs 14q24.1  |
| homeodomain inter                         | hs 7q34     |
| chromosome 6 oper                         | hs 6q14.3   |
| phosphodiesterase 9                       | hs 21q22.3  |
| RE1-silencing transcr                     | hs 4q12     |
| OTU domain, ubiquit                       | hs 14q32.13 |
| similar to hCG16402                       | hs 11q13.4  |
|                                           | hs 22q11.22 |
| ATP-binding cassette                      | hs 2q35     |
| carcinoembryonic an                       | hs 19q13.2  |
| phosphatidylinositol                      | hs 17p11.2  |
| hypothetical LOC349                       | hs 8p23.1   |
|                                           | hs 10q11.22 |
| G protein-coupled re                      | hs Xq22.1   |
| solute carrier family                     | hs 17q24.2  |
| chromosome 9 oper                         | hs 9p22.3   |
| GTPase, IMAP family                       | hs 7q36.1   |
| chromosome 7 oper                         | hs 7p15.3   |
|                                           | hs Xp11.4   |
| NADH dehydrogenase, subunit 2 (complex I) |             |
| interferon-induced p                      | hs 10q23.31 |
| B-cell CLL/lymphoma                       | hs 18q21.33 |
| glycerol kinase 5 (pu                     | hs 3q23     |
| annexin A1                                | hs 9q21.13  |
| transmembrane pro                         | hs 22q12.3  |
|                                           | hs 10q22.2  |



|                        |             |
|------------------------|-------------|
| zinc finger and BTB d  | hs Xq24     |
| TAF13 RNA polymer      | hs 1p13.3   |
|                        | hs 16q12.1  |
| inhibin, beta B        | hs 2q14.2   |
| zinc finger and BTB d  | hs 3q23     |
| hypothetical LOC341    | hs 12p11.23 |
| exostoses (multiple)   | hs 8p21.1   |
|                        | hs 5q31.1   |
| ankyrin repeat doma    | hs 2q11.2   |
|                        | hs 9p11.2   |
| cadherin, EGF LAG s    | hs 3p21.31  |
| transmembrane pro      | hs 19p13.11 |
| hairy/enhancer-of-s    | hs 1p34.2   |
| THAP domain contain    | hs 7q31.1   |
| complement compo       | hs 12p13.31 |
| zinc finger and BTB d  | hs 3q23     |
| A kinase (PRKA) anch   | hs 15q25.3  |
|                        | hs 4q35.1   |
| leukemia inhibitory f  | hs 5p13.1   |
| tetraspanin 9          | hs 12p13.32 |
| uncoupling protein 2   | hs 11q13.4  |
| BCL2-like 11 (apopto   | hs 2q13     |
| chromosome 20 open     | hs 20q13.12 |
| tRNA splicing endon    | hs 17q25.1  |
| leucine rich repeat d  | hs 1p22.2   |
| Bardet-Biedl syndrom   | hs 2q31.1   |
| interferon regulator   | hs 5q31.1   |
| decorin                | hs 12q21.33 |
| chromosome 15 open     | hs 15q15.1  |
| coagulation factor II  | hs 5q13.3   |
| tenascin XB            | hs 6p21.32  |
| major facilitator sup  | hs 1q32.1   |
| phospholipase A2, g    | hs 15q15.1  |
| TBC1 domain family     | hs 20p13    |
| SH3 domain contain     | hs 2p25.3   |
| coiled-coil domain c   | hs 13q14.11 |
|                        | hs 19p13.3  |
|                        |             |
|                        | hs 6p22.3   |
| collagen, type VI, alp | hs 21q22.3  |
|                        | hs 17q25.3  |
|                        | hs 14q22.1  |
| myocyte enhancer fa    | hs 19p13.11 |
| transmembrane 7 su     | hs 11q13.1  |
| filamin binding LIM p  | hs 1p36.21  |
|                        | hs 12q24.11 |
| hypoxia-inducible pr   | hs 7q32.1   |

|                        |             |
|------------------------|-------------|
| nucleosome assembl     | hs Xq13.2   |
|                        | hs 17q23.2  |
| intercellular adhesio  | hs 19p13.2  |
| vascular endothelial   | hs 6p21.1   |
|                        | hs 9q21.13  |
| cyclin D1              | hs 11q13.2  |
| chromosome 9 oper      | hs 9q21.11  |
| ATPase, class I, type  | hs 19p13.3  |
| monoamine oxidase      | hs Xp11.3   |
|                        | hs 14q13.1  |
|                        | hs 5q32     |
| matrix metallopeptid   | hs 17q12    |
| HRAS-like suppressor   | hs 11q12.3  |
| zinc finger protein 1  | hs 19q13.43 |
| desmoglein 2           | hs 18q12.1  |
| histone cluster 1, H2  | hs 6p22.1   |
|                        | hs 17p13.3  |
|                        | hs 1q21.3   |
| chromosome 14 open     | hs 14q32.13 |
| neuralized homolog     | hs 10q24.33 |
| elongation of very lo  | hs 6q14.1   |
|                        | hs 15q25.2  |
| ring finger and FYVE   | hs 17q12    |
|                        | hs 1p36.33  |
|                        |             |
| protein phosphatase    | hs 20q11.23 |
| ribosomal protein S2   | hs 16q22.1  |
| major histocompatit    | hs 6p21.32  |
| proprotein converta    | hs 19p13.3  |
| six transmembrane c    | hs 7q21.13  |
| thrombospondin 1       | hs 15q14    |
| FYN binding protein    | hs 5p13.1   |
|                        | hs 2p25.3   |
|                        | hs 14q32.31 |
| cat eye syndrome ch    | hs 22q11.21 |
| chromosome 22 open     | hs 22q11.21 |
| chromosome 4 open      | hs 4q32.1   |
| regulator of G-prote   | hs 1q31.2   |
| major histocompatit    | hs 6p21.33  |
| phosphoserine phos     | hs 7p11.2   |
| chromosome 7 open      | hs 7p13     |
| ankyrin repeat doma    | hs 11q14.1  |
| Rho-associated, coil   | hs 18q11.1  |
|                        | hs Yq11.21  |
| sine oculis binding p  | hs 6q21     |
| hepatitis A virus cell | hs 5q33.3   |
| bleomycin hydrolase    | hs 17q11.2  |

|                        |             |
|------------------------|-------------|
| Fanconi anemia, con    | hs 16q24.3  |
|                        | hs 11p11.2  |
| family with sequenc    | hs 2p25.3   |
| zinc finger protein in | hs 19q13.43 |
| prostaglandin E rece   | hs 5p13.1   |
| RUN domain contain     | hs 17q21.31 |
| ribosomal protein L3   | hs 16p13.3  |
| glutamate receptor,    | hs 10q23.1  |
| bradykinin receptor    | hs 14q32.2  |
|                        | hs 3q27.2   |
| nucleoporin 43kDa      | hs 6q25.1   |
| cytochrome P450, fa    | hs 1p33     |
| solute carrier family  | hs Xp11.3   |
| tubulin, alpha 1c      | hs 12q13.12 |
| KIAA1328               | hs 18q12.2  |
| crystallin, beta B2    | hs 22q11.23 |
| intercellular adhesio  | hs 19p13.2  |
| RUN domain contain     | hs 7q21.12  |
| complement compo       | hs 6p21.32  |
| NIMA (never in mito    | hs 3q22.1   |
| progesterin and adipo  | hs 1p36.11  |
| mitogen-activated p    | hs 14q24.2  |
|                        | hs 18q21.2  |
| melanoregulin          | hs 2q35     |
|                        | hs 17q25.3  |
| KIAA1539               | hs 9p13.3   |
| sema domain, trans     | hs 15q21.1  |
| myeloid/lymphoid o     | hs 6q27     |
| progesterin and adipo  | hs 6p12.2   |
| forkhead box S1        | hs 20q11.21 |
| chromosome 5 oper      | hs 5p13.3   |
| TBC1 domain family,    | hs 13q22.2  |
| calcyphosine 2         | hs 12q21.1  |
| histone cluster 1, H4  | hs 6p22.1   |
| platelet derived gro   | hs 4q32.1   |
|                        | hs 15q22.2  |
| toll-like receptor 3   | hs 4q35.1   |
| low density lipoprot   | hs 22q11.23 |
| coiled-coil domain c   | hs 5q23.2   |
| sema domain, immu      | hs 2q11.2   |
|                        | hs 1p34.1   |
|                        | hs 3p14.1   |
| early growth respon    | hs 5q31.2   |
| similar to CG14853-f   | hs 2q31.1   |
| calmodulin-like 3      | hs 10p15.1  |
| trophoblast glycopro   | hs 6q14.1   |
| tumor necrosis facto   | hs 17p13.1  |

|                        |             |
|------------------------|-------------|
| mastermind-like 2 (D   | hs 11q21    |
| chromosome 18 open     | hs 18p11.21 |
| PHD finger protein 1   | hs 5q31.1   |
| chemokine (C-C motif)  | hs 17q12    |
| zinc finger protein 7  | hs Xq21.1   |
| NEDD4 binding protein  | hs 13q13.1  |
| palmitoyl-protein thio | hs 6p21.32  |
|                        | hs 11p15.4  |
| laminin, beta 4        | hs 7q31.1   |
| dihydrouridine synthet | hs 7q22.3   |
| glucuronidase, beta    | hs 5q13.2   |
| lipase, endothelial    | hs 18q21.1  |
| CD302 molecule         | hs 2q24.2   |
| zinc finger protein 2  | hs 17p12    |
| adhesion molecule v    | hs 1p13.3   |
| keratin 16 (focal non  | hs 17q21.2  |
| sphingomyelin phospho  | hs 16q22.1  |
| filaggrin              | hs 1q21.3   |
| N-deacetylase/N-sulf   | hs 5q33.1   |
| calmodulin-like 4      | hs 15q23    |
| KIAA1407               | hs 3q13.31  |
| polyserase 3           | hs 16p11.2  |
| hypothetical LOC375    | hs 18p11.21 |
| heat shock 70kDa pro   | hs 6p21.33  |
| cystatin A (stefin A)  | hs 3q21.1   |
| protease, serine, 23   | hs 11q14.2  |
|                        | hs 9q21.32  |
| gamma-aminobutyric     | hs 5q35.1   |
|                        | hs 7q31.32  |
| NAD synthetase 1       | hs 11q13.4  |
| transmembrane pro      | hs 17q21.2  |
| chromosome 10 open     | hs 10q11.21 |
| LIM domain only 2 (f   | hs 11p13    |
| hypothetical protein   | hs 9q34.11  |
| transmembrane pro      | hs 3p25.1   |
| prostaglandin I2 (pro  | hs 19q13.32 |
| tripeptidyl peptidase  | hs 11p15.4  |
| X antigen family, me   | hs Xp11.22  |
|                        | hs 19q13.41 |
| coiled-coil domain c   | hs 5q22.3   |
| cyclin-dependent kin   | hs 7q21.2   |
| src kinase associated  | hs 17q21.32 |
|                        | hs 1p36.23  |
| ankyrin repeat doma    | hs 4q13.3   |
| keratin 4              | hs 12q13.13 |
| chromosome 16 open     | hs 16q24.1  |
| solute carrier family  | hs 17q24.2  |

|                       |             |
|-----------------------|-------------|
| cytochrome P450, fa   | hs 2p13.3   |
| solute carrier family | hs 18q12.2  |
|                       | hs 9p13.3   |
| chromosome 12 open    | hs 12q23.3  |
| syndecan 1            | hs 2p24.1   |
| plexin A4             | hs 7q32.3   |
| sorting nexin 10      | hs 7p15.2   |
|                       | hs 12q13.13 |
|                       | hs Xq21.33  |
| discs, large homolog  | hs 10q22.3  |
| hepatocyte growth f   | hs 17q25.3  |
| hypothetical protein  | hs 13q34    |
| thioredoxin domain    | hs 20p12.3  |
| cysteine-rich protein | hs 14q32.33 |
|                       | hs 8q24.3   |
|                       | hs 5q14.3   |
| hypothetical protein  | hs 16q24.3  |
| myelin protein zero-  | hs 1q24.2   |
|                       | hs 4q35.1   |
|                       | hs 6p24.3   |
| hypothetical LOC645   | hs 17p11.2  |
| essential meiotic en  | hs 16p13.3  |
| chromosome 9 open     | hs 9p22.3   |
| Nipped-B homolog (    | hs 5p13.2   |
|                       | hs 18q21.2  |
|                       | hs 2q24.1   |
| adrenergic, beta-2-,  | hs 5q33.1   |
| KIAA1632              | hs 18q12.3  |
| transmembrane pro     | hs 2q35     |
|                       | hs 9q34.3   |
| XK, Kell blood group  | hs Xq22.1   |
| msh homeobox 1        | hs 4p16.2   |
| interferon, alpha-inc | hs 14q32.13 |
| AXL receptor tyrosin  | hs 19q13.2  |
| BMS1 pseudogene 5     | hs 10q11.22 |
| pim-1 oncogene        | hs 6p21.2   |
| protein kinase, cAM   | hs 7p22.3   |
| hypothetical protein  | hs 3p22.1   |
| cathepsin B           | hs 8p23.1   |
| vitrin                | hs 2p22.2   |
| centromere protein    | hs 22q13.2  |
| spondin 2, extracellu | hs 4p16.3   |
|                       | hs 22q12.2  |
|                       | hs 1p36.21  |
| lysophosphatidylcho   | hs 5p15.33  |
| hypothetical protein  | hs 2q33.3   |
| neuregulin 1          | hs 8p12     |

|                        |             |
|------------------------|-------------|
|                        | hs 2p22.2   |
| retinoic acid induced  | hs Xp22.13  |
|                        | hs 9p21.3   |
| peroxisomal membr      | hs 20q11.22 |
| transmembrane pro      | hs 1q32.3   |
| acyl-Coenzyme A de     | hs 11q25    |
|                        | hs Xq26.2   |
|                        | hs 1p36.33  |
| serine/threonine kin   | hs 5q35.1   |
| carboxypeptidase A4    | hs 7q32.2   |
|                        | hs 5p12     |
| chromosome 6 oper      | hs 6q22.31  |
| adducin 3 (gamma)      | hs 10q25.2  |
| collagen, type IV, alp | hs Xq22.3   |
| protocadherin beta     | hs 5q31.3   |
|                        | hs 12p13.31 |
| family with sequenc    | hs 4p15.33  |
| calcitonin receptor-l  | hs 2q32.1   |
| transmembrane and      | hs 12q22    |
| annexin A11            | hs 10q22.3  |
| purinergic receptor    | hs 3q25.2   |
| chromosome 22 ope      | hs 22q13.31 |
|                        | hs 4q23     |
| acyl-Coenzyme A ox     | hs 4p16.1   |
| zinc finger protein 8  | hs 19q13.43 |
|                        | hs 4q33     |
| hypothetical LOC151    | hs 2p13.1   |
| family with sequenc    | hs 1q42.2   |
| casein kinase 1, alph  | hs 13q13.3  |
| chromosome 6 oper      | hs 6q21     |
| hypothetical gene su   | hs 1q23.3   |
| chromosome 13 ope      | hs 13q14.11 |
| FERM, RhoGEF and p     | hs 2q37.3   |
| tumor necrosis facto   | hs 6p12.3   |
| spire homolog 1 (Dro   | hs 18p11.21 |
| class II, major histoc | hs 16p13.13 |
|                        | hs 12q21.33 |
| NOL1/NOP2/Sun do       | hs 4p14     |
| similar to hCG18129    | hs 2q14.2   |
|                        | hs 16p13.3  |
| CREB binding protei    | hs 16p13.3  |
|                        | hs 19q13.33 |
|                        | hs 9q34.11  |
| interferon-induced p   | hs 10q23.31 |
| synaptotagmin XVII     | hs 16p12.3  |
| kinase D-interacting   | hs 2p25.1   |
| inhibitor of DNA bin   | hs 20q11.21 |

|                        |             |
|------------------------|-------------|
| Kruppel-like factor 6  | hs 10p15.1  |
| hypothetical protein   | hs 1q25.2   |
| dual-specificity tyros | hs 21q22.13 |
|                        | hs 15q22.2  |
| opsin 1 (cone pigme    | hs Xq28     |
| potassium voltage-g    | hs 2p21     |
|                        | hs 1p34.1   |
| family with sequenc    | hs 4p15.33  |
| lymphocyte antigen     | hs 2q24.2   |
|                        | hs 8p11.21  |
| forkhead box P2        | hs 7q31.1   |
| keratinocyte growth    | hs 9p11.2   |
| telomerase reverse t   | hs 5p15.33  |
|                        | hs 21q22.3  |
| HIV-1 Tat interactive  | hs 11p15.1  |
| prostaglandin E rece   | hs 5p13.1   |
| shroom family mem      | hs 5q31.1   |
| chromosome 15 ope      | hs 15q14    |
| hypothetical protein   | hs 16p11.2  |
| chromosome 13 ope      | hs 13q14.11 |
| GATA binding protei    | hs 10p14    |
| MYST histone acetyl    | hs 10q22.2  |
|                        | hs 2q11.2   |
|                        | hs 13q12.12 |
| transmembrane pro      | hs 5q13.2   |
|                        | hs 16p13.3  |
| hypothetical protein   | hs 9q34.3   |
| BCL6 co-repressor      | hs Xp11.4   |
| inhibin, beta B        | hs 2q14.2   |
| chemokine (C-X-C m     | hs 4q13.3   |
| RIMS binding protei    | hs 22q11.21 |
| HtrA serine peptidas   | hs 4p16.1   |
| chromosome 3 oper      | hs 3p14.3   |
| collagen, type XXI, a  | hs 6p12.1   |
| zinc finger and BTB d  | hs 11q23.2  |
|                        |             |
| leukocyte receptor d   | hs 19q13.42 |
| karyopherin alpha 5    | hs 6q22.2   |
| chromodomain heli      | hs 16q12.2  |
|                        | hs 19q13.2  |
|                        | hs 5q11.2   |
|                        | hs 3q28     |
| G kinase anchoring p   | hs 9q21.32  |
| PHD finger protein 6   | hs Xq26.2   |
| family with sequenc    | hs 5p15.2   |
| zinc finger protein 4  | hs 19q13.43 |
| transmembrane pro      | hs 17q25.3  |

|                                                                         |             |
|-------------------------------------------------------------------------|-------------|
| deoxyribonuclease I                                                     | hs 16p13.3  |
| chromosome 12 open reading frame 1                                      | hs 12p13.32 |
| unc-84 homolog A (Caenorhabditis elegans)                               | hs 7p22.3   |
|                                                                         | hs 9p13.3   |
| hypothetical protein                                                    | hs 11q14.1  |
| major histocompatibility complex class II, invariant chain              | hs 1q25.3   |
|                                                                         | hs 5q33.2   |
| cingulin                                                                | hs 1q21.3   |
| zinc finger protein 4                                                   | hs 19p12    |
| heat shock protein 90 alpha class B member 1                            | hs 6p21.1   |
|                                                                         | hs 10q22.2  |
| TBK1 binding protein                                                    | hs 17q21.32 |
| chromosome 1 open reading frame 1                                       | hs 1q41     |
|                                                                         | hs 10p12.32 |
|                                                                         | hs Xp22.33  |
| MRE11 meiotic recombination endonuclease                                | hs 11q21    |
| KIAA0913                                                                | hs 10q22.2  |
| chromosome 21 open reading frame 1                                      | hs 21q22.11 |
|                                                                         | hs 1p36.22  |
| exportin, tRNA (nuclear) specific                                       | hs 12q14.2  |
| protein phosphatase 2C, cytosolic                                       | hs 8p23.1   |
| iron-sulfur cluster assembly protein                                    | hs 9q21.33  |
| hematopoietic cell stem factor                                          | hs 19q13.12 |
| chromosome 1 open reading frame 1                                       | hs 1p36.11  |
| hypothetical protein                                                    | hs 16p12.3  |
| myelin protein zero                                                     | hs 11q23.3  |
| oxysterol binding protein                                               | hs 22q12.2  |
| cadherin-like 23                                                        | hs 10q22.1  |
| activin A receptor type 1                                               | hs 12q13.13 |
| keratin associated protein 1                                            | hs 17q21.2  |
| cyclin-dependent kinase 2                                               | hs 9p21.3   |
| fibrinogen C domain                                                     | hs 9q34.12  |
| ANKRD26-like family                                                     | hs 2q21.1   |
| laminin, alpha 3                                                        | hs 18q11.2  |
| cytochrome b5 reductase                                                 | hs 22q13.2  |
| solute carrier family 12 member 1                                       | hs 20p13    |
| chemokine (C motif) subfamily 1                                         | hs 3p21.31  |
| chemokine (C-X-C motif) subfamily 1                                     | hs 10q11.21 |
| family with sequence similarity 100 member A                            | hs 15q25.1  |
| ankyrin repeat domain                                                   | hs 9p12     |
| similar to peptidylprolyl isomerase                                     | hs 11q22.1  |
| GLIS family zinc finger 1                                               | hs 16p13.3  |
| solute carrier family 11 member 1                                       | hs 11q12.1  |
| sodium channel and voltage-gated potassium channel superfamily member 1 | hs 4q28.2   |
| transducin (beta)-like 1                                                | hs 3q26.32  |
| kinesin family member 1                                                 | hs 20q11.21 |
| CSAG family, member 1                                                   | hs Xq28     |



|                               |             |
|-------------------------------|-------------|
| heterogeneous nucleosome      | hs 5q31.2   |
| homeodomain interdigitated    | hs 7q34     |
| cytochrome b                  |             |
| zinc finger protein 8         | hs 19q13.12 |
| epsin 3                       | hs 17q21.33 |
| glia maturation factor        | hs 19q13.2  |
| C-type lectin domain          | hs 12p13.31 |
| E2F transcription factor      | hs 6p22.3   |
| KIAA0913                      | hs 10q22.2  |
| calcium channel, voltage      | hs 7q21.11  |
| fibroblast growth factor      | hs 10q26.13 |
|                               | hs 4q22.1   |
| cancer susceptibility         | hs 15q15.3  |
|                               | hs 5q11.2   |
| coiled-coil domain containing | hs 5q23.2   |
| l(3)mbt-like (Drosophila)     | hs 20q13.12 |
| T cell receptor alpha         | hs 14q11.2  |
| NIMA (never in mitosis)       | hs 4q33     |
| cyclin F                      | hs 16p13.3  |
| platelet-activating factor    | hs 1p35.3   |
| troponin T type 2 (cardiac)   | hs 1q32.1   |
| chromosome 15 open reading    | hs 15q15.1  |
|                               | hs 8p23.1   |
| chromosome 20 open reading    | hs 20q13.31 |
|                               | hs 11p11.2  |
| butyrylcholinesterase         | hs 3q26.1   |
| E74-like factor 5 (ets)       | hs 11p13    |
| armadillo repeat containing   | hs Xq22.1   |
| CCR4-NOT transcription        | hs 5q35.3   |
| Ly6/neurotoxin 1              | hs 8q24.3   |
| cyclin-dependent kinase       | hs 12p13.1  |
| GTPase activating Ras         | hs 17p13.3  |
| enhancer of polycomb          | hs 10p11.22 |
|                               | hs 8q22.3   |
| serine/threonine kinase       | hs 20q13.12 |
| Hox transcript antisense      | hs 12q13.13 |
| homeobox A10                  | hs 7p15.2   |
| family with sequence          | hs 6q14.1   |
| TSPY-like 2                   | hs Xp11.22  |
| FCH and double SH3            | hs 5q31.3   |
|                               | hs 7q22.1   |
| Meis homeobox 3 protein       | hs 17p11.2  |
| zinc finger protein 5         | hs 10q23.33 |
| coiled-coil domain containing | hs 12q21.1  |
| ribosomal protein S6          | hs 6q27     |
| zinc finger protein 3         | hs 10q21.2  |
|                               | hs 6p22.3   |

|                        |            |
|------------------------|------------|
| solute carrier family  | hs 17p11.2 |
| interleukin 28A (inte  | hs 19q13.2 |
| meteorin, glial cell d | hs 17q25.3 |
